# Supplementary material for: Mitochondrial Genome Sequence of Salvia officinalis (Lamiales: Lamiaceae) Suggests Diverse Genome Structures in Cogeneric Species and Finds the Stop Gain of Genes through RNA Editing Events
Source: MDPI journal article supplement (doi:10.3390/ijms24065372), 2023-03-11

# Mitochondrial Genome Sequence of *Salvia officinalis* (Lamiales: Lamiaceae) Suggests Diverse Genome Structures in Cogeneric Species and Finds the Stop Gain of Genes through RNA Editing Events

Heyu Yang <sup>1,2</sup>, Haimei Chen <sup>2</sup>, Yang Ni <sup>2</sup>, Jingling Li <sup>2</sup>, Yisha Cai <sup>2</sup>, Jiehua Wang <sup>1,\*</sup> and Chang Liu <sup>2,\*</sup>

<sup>1</sup> School of Environmental Science and Engineering, Tianjin University, Tianjin 300072, China

<sup>2</sup> Institute of Medicinal Plant Development, Chinese Academy of Medical Sciences, Peking Union Medical College, Beijing 100193, China

\* Correspondence: jiehuawang@tju.edu.cn (J.W.); cliu@implad.ac.cn (C.L.); Tel.: +86-022-8740-2072 (J.W.); +86-10-5783-3111 (C.L.); Fax: +86-022-2740-7956 (J.W.); +86-10-62899715 (C.L.)

Table S1 Statistic summary of the sequencing data generated by Nanopore and Illumina platforms.

| Sequencing descriptors                     | Sequencing platform        |                                 |
|--------------------------------------------|----------------------------|---------------------------------|
|                                            | Nanopore                   | Illumina                        |
| Total number of nucleotides (raw data, bp) | 11,326,908,802             | 16,380,908,800                  |
| Total Number of Reads                      | 505,210                    | 163,809,088                     |
| Mean Read Length (bp)                      | 22,420                     | 100                             |
| Total Number of Mapped Reads               | 23,959 (MC1), 13,431(MC2)  | 3,291,507 (MC1), 1,021,009(MC2) |
| Average Coverage Depth                     | 327.77 (MC1), 396.13 (MC2) | 969.556 (MC1), 903.15 (MC2)     |



Table S2 Results for mapping Nanopore long reads to the four possible conformations associated with three HSPs (r01–r52). “MC1/2”: mitogenome chromosome 1/2. The recombination frequency was calculated as the number of reads mapped to conformations having less number of mapped reads divided by that mapped to all four conformations.

| ID of the HSP | Query sequence | Subject sequence | Identity (%) | Alignment Length | Numbers of Mismatches | Numbers of Gap openings | Positions of Repeat Copy 1 |        | Positions of Repeat Copy 2 |        | E-value  | Type     | Numbers of Long Reads Mapped to Each Conformation |    |    |    | Recombination frequency (%) |
|---------------|----------------|------------------|--------------|------------------|-----------------------|-------------------------|----------------------------|--------|----------------------------|--------|----------|----------|---------------------------------------------------|----|----|----|-----------------------------|
|               |                |                  |              |                  |                       |                         | Start                      | End    | Start                      | End    |          |          | c1                                                | c2 | c3 | c4 |                             |
| r03           | MC1            | MC1              | 87.861       | 173              | 15                    | 6                       | 190502                     | 190671 | 94435                      | 94266  | 1.26E-49 | inverted | 15                                                | 32 | 0  | 0  | 0                           |
| r04           | MC1            | MC1              | 100          | 80               | 0                     | 0                       | 226961                     | 227040 | 28759                      | 28838  | 1.28E-34 | direct   | 23                                                | 26 | 0  | 0  | 0                           |
| r05           | MC1            | MC1              | 97.5         | 80               | 2                     | 0                       | 166752                     | 166831 | 29701                      | 29780  | 2.78E-31 | direct   | 0                                                 | 7  | 0  | 0  | 0                           |
| r06           | MC1            | MC1              | 94.937       | 79               | 1                     | 1                       | 221621                     | 221696 | 28709                      | 28631  | 2.8E-26  | inverted | 26                                                | 26 | 0  | 0  | 0                           |
| r07           | MC1            | MC1              | 98.507       | 67               | 1                     | 0                       | 181259                     | 181325 | 82141                      | 82075  | 1.01E-25 | inverted | 20                                                | 13 | 1  | 0  | 0                           |
| r08           | MC1            | MC1              | 100          | 61               | 0                     | 0                       | 253935                     | 253995 | 237908                     | 237848 | 4.68E-24 | inverted | 17                                                | 29 | 1  | 0  | 0                           |
| r09           | MC1            | MC1              | 98.387       | 62               | 1                     | 0                       | 222237                     | 222298 | 183614                     | 183675 | 6.06E-23 | direct   | 17                                                | 19 | 0  | 0  | 0                           |
| r10           | MC1            | MC1              | 93.243       | 74               | 4                     | 1                       | 242683                     | 242756 | 29375                      | 29303  | 2.18E-22 | inverted | 15                                                | 26 | 0  | 0  | 0                           |

|     |     |     |            |    |   |   |            |            |            |            |          |              |    |    |   |   |   |
|-----|-----|-----|------------|----|---|---|------------|------------|------------|------------|----------|--------------|----|----|---|---|---|
| r11 | MC1 | MC1 | 100        | 53 | 0 | 0 | 5835<br>2  | 5840<br>4  | 4704<br>6  | 4709<br>8  | 1.31E-19 | direct       | 20 | 23 | 0 | 0 | 0 |
| r12 | MC1 | MC1 | 100        | 53 | 0 | 0 | 2308<br>17 | 2308<br>69 | 5840<br>4  | 5835<br>2  | 1.31E-19 | invert<br>ed | 15 | 20 | 0 | 0 | 0 |
| r13 | MC1 | MC1 | 100        | 52 | 0 | 0 | 8179<br>4  | 8184<br>5  | 3821<br>3  | 3816<br>2  | 4.71E-19 | invert<br>ed | 20 | 31 | 0 | 0 | 0 |
| r14 | MC1 | MC1 | 100        | 46 | 0 | 0 | 2348<br>54 | 2348<br>99 | 4594<br>8  | 4599<br>3  | 1.02E-15 | direct       | 25 | 37 | 0 | 0 | 0 |
| r15 | MC1 | MC1 | 97.95<br>9 | 49 | 0 | 1 | 2277<br>88 | 2278<br>35 | 1603<br>05 | 1603<br>53 | 3.67E-15 | direct       | 17 | 20 | 0 | 0 | 0 |
| r16 | MC1 | MC1 | 91.37<br>9 | 58 | 5 | 0 | 1385<br>05 | 1385<br>62 | 6555<br>3  | 6561<br>0  | 4.75E-14 | direct       | 18 | 28 | 0 | 0 | 0 |
| r17 | MC1 | MC1 | 97.72<br>7 | 44 | 1 | 0 | 1496<br>21 | 1496<br>64 | 2616<br>10 | 2615<br>67 | 6.14E-13 | invert<br>ed | 25 | 28 | 0 | 0 | 0 |
| r18 | MC1 | MC1 | 100        | 40 | 0 | 0 | 1710<br>82 | 1711<br>21 | 1929<br>6  | 1933<br>5  | 2.21E-12 | direct       | 21 | 25 | 0 | 0 | 0 |
| r19 | MC1 | MC1 | 100        | 40 | 0 | 0 | 1823<br>55 | 1823<br>94 | 9107<br>7  | 9111<br>6  | 2.21E-12 | direct       | 12 | 22 | 0 | 0 | 0 |
| r20 | MC1 | MC1 | 95.34<br>9 | 43 | 2 | 0 | 9825<br>0  | 9829<br>2  | 2739<br>5  | 2735<br>3  | 1.03E-10 | invert<br>ed | 18 | 26 | 0 | 0 | 0 |
| r21 | MC1 | MC1 | 100        | 37 | 0 | 0 | 1288<br>25 | 1288<br>61 | 1266<br>75 | 1267<br>11 | 1.03E-10 | direct       | 26 | 23 | 0 | 0 | 0 |
| r22 | MC1 | MC1 | 91.66<br>7 | 48 | 3 | 1 | 1799<br>01 | 1799<br>48 | 6802<br>0  | 6797<br>4  | 1.33E-09 | invert<br>ed | 20 | 13 | 0 | 0 | 0 |
| r23 | MC1 | MC1 | 100        | 35 | 0 | 0 | 8604<br>8  | 8608<br>2  | 8593<br>1  | 8596<br>5  | 1.33E-09 | direct       | 3  | 16 | 0 | 0 | 0 |

|     |     |     |        |     |    |   |        |        |        |        |            |          |    |    |   |   |   |
|-----|-----|-----|--------|-----|----|---|--------|--------|--------|--------|------------|----------|----|----|---|---|---|
| r24 | MC1 | MC1 | 100    | 35  | 0  | 0 | 188677 | 188711 | 129203 | 129237 | 1.33E-09   | direct   | 12 | 19 | 0 | 0 | 0 |
| r25 | MC1 | MC1 | 90.196 | 51  | 4  | 1 | 67974  | 68023  | 179948 | 179898 | 1.33E-09   | inverted | 16 | 21 | 0 | 0 | 0 |
| r26 | MC1 | MC1 | 100    | 34  | 0  | 0 | 186062 | 186095 | 59133  | 59100  | 4.78E-09   | inverted | 7  | 24 | 0 | 0 | 0 |
| r27 | MC1 | MC1 | 97.222 | 36  | 1  | 0 | 110507 | 110542 | 27781  | 27746  | 1.72E-08   | inverted | 29 | 36 | 0 | 0 | 0 |
| r28 | MC1 | MC1 | 97.222 | 36  | 1  | 0 | 135779 | 135814 | 126679 | 126644 | 1.72E-08   | inverted | 16 | 27 | 0 | 0 | 0 |
| r29 | MC1 | MC1 | 94.872 | 39  | 2  | 0 | 236663 | 236701 | 166693 | 166731 | 1.72E-08   | direct   | 26 | 2  | 0 | 0 | 0 |
| r30 | MC1 | MC1 | 100    | 30  | 0  | 0 | 189917 | 189946 | 58633  | 58604  | 0.0000008  | inverted | 11 | 25 | 0 | 0 | 0 |
| r31 | MC1 | MC1 | 100    | 29  | 0  | 0 | 96839  | 96867  | 95259  | 95287  | 0.00000288 | direct   | 17 | 24 | 0 | 0 | 0 |
| r32 | MC1 | MC2 | 100    | 90  | 0  | 0 | 28822  | 28911  | 6978   | 7067   | 3.54E-40   | direct   | 23 | 18 | 0 | 0 | 0 |
| r33 | MC1 | MC2 | 97.674 | 86  | 2  | 0 | 26796  | 26881  | 12509  | 12424  | 1.28E-34   | direct   | 20 | 14 | 0 | 0 | 0 |
| r34 | MC1 | MC2 | 98.611 | 72  | 1  | 0 | 138426 | 138497 | 12641  | 12570  | 1.67E-28   | direct   | 20 | 15 | 0 | 0 | 0 |
| r35 | MC1 | MC2 | 95.062 | 81  | 0  | 1 | 164744 | 164824 | 34518  | 34594  | 2.16E-27   | direct   | 50 | 23 | 0 | 0 | 0 |
| r36 | MC1 | MC2 | 85.981 | 107 | 11 | 2 | 26755  | 26857  | 7617   | 7511   | 1.68E-23   | direct   | 25 | 19 | 0 | 0 | 0 |

|     |     |     |            |    |   |   |            |            |           |           |                 |        |    |    |   |   |   |
|-----|-----|-----|------------|----|---|---|------------|------------|-----------|-----------|-----------------|--------|----|----|---|---|---|
| r37 | MC1 | MC2 | 100        | 46 | 0 | 0 | 1451<br>08 | 1451<br>53 | 4177      | 4132      | 1.02E-15        | direct | 30 | 19 | 0 | 0 | 0 |
| r38 | MC1 | MC2 | 97.95<br>9 | 49 | 1 | 0 | 9674<br>5  | 9679<br>3  | 5625      | 5577      | 1.02E-15        | direct | 33 | 7  | 0 | 0 | 0 |
| r39 | MC1 | MC2 | 85.89<br>7 | 78 | 7 | 2 | 5838<br>7  | 5846<br>0  | 2643<br>4 | 2635<br>7 | 4.75E-14        | direct | 30 | 12 | 0 | 0 | 0 |
| r40 | MC1 | MC2 | 100        | 40 | 0 | 0 | 1164<br>73 | 1165<br>12 | 3550<br>3 | 3546<br>4 | 2.21E-12        | direct | 28 | 14 | 0 | 0 | 0 |
| r41 | MC1 | MC2 | 100        | 37 | 0 | 0 | 2307<br>06 | 2307<br>42 | 2633<br>0 | 2636<br>6 | 1.03E-10        | direct | 8  | 17 | 0 | 0 | 0 |
| r42 | MC1 | MC2 | 95.34<br>9 | 43 | 1 | 1 | 1430<br>45 | 1430<br>86 | 8716      | 8674      | 3.7E-10         | direct | 21 | 17 | 0 | 0 | 0 |
| r43 | MC1 | MC2 | 91.48<br>9 | 47 | 2 | 1 | 1775<br>00 | 1775<br>44 | 7245      | 7199      | 4.78E-09        | direct | 17 | 19 | 0 | 0 | 0 |
| r44 | MC1 | MC2 | 100        | 31 | 0 | 0 | 1070<br>17 | 1070<br>47 | 3662<br>3 | 3665<br>3 | 0.000000<br>222 | direct | 23 | 23 | 0 | 0 | 0 |
| r45 | MC1 | MC2 | 100        | 29 | 0 | 0 | 6555<br>3  | 6558<br>1  | 1251<br>9 | 1249<br>1 | 0.000002<br>88  | direct | 28 | 16 | 0 | 0 | 0 |
| r46 | MC1 | MC2 | 90.24<br>4 | 41 | 4 | 0 | 2030<br>11 | 2030<br>51 | 2032<br>2 | 2036<br>2 | 0.000002<br>88  | direct | 30 | 18 | 0 | 0 | 0 |
| r48 | MC1 | MC2 | 95.83<br>3 | 48 | 2 | 0 | 1385<br>95 | 1385<br>48 | 7487      | 7534      | 2.53E-14        | direct | 11 | 7  | 0 | 0 | 0 |
| r49 | MC1 | MC2 | 94.28<br>6 | 35 | 0 | 2 | 6559<br>2  | 6555<br>8  | 2641<br>5 | 2644<br>7 | 0.000001<br>54  | direct | 14 | 24 | 0 | 0 | 0 |
| r50 | MC1 | MC2 | 96.77<br>4 | 31 | 1 | 0 | 1283<br>21 | 1282<br>91 | 2179<br>8 | 2182<br>8 | 0.000001<br>54  | direct | 20 | 22 | 0 | 0 | 0 |

|     |     |     |            |    |   |   |            |            |           |           |                |        |    |    |   |   |   |
|-----|-----|-----|------------|----|---|---|------------|------------|-----------|-----------|----------------|--------|----|----|---|---|---|
| r51 | MC1 | MC2 | 100        | 28 | 0 | 0 | 1385<br>44 | 1385<br>17 | 2641<br>5 | 2644<br>2 | 0.000001<br>54 | direct | 13 | 18 | 0 | 0 | 0 |
| r52 | MC2 | MC2 | 96.22<br>6 | 53 | 2 | 0 | 1244<br>8  | 1250<br>0  | 7511      | 7563      | 4.21E-17       | direct | 2  | 24 | 0 | 0 | 0 |

---

Table S3 PCR primers used to detect the homologous recombination of the three repeats in the *S. officinalis* mitogenome.

| Primer Name | Corresponding DBS ID | Corresponding Repetitive sequence ID | Primer Sequence (5'→3') |
|-------------|----------------------|--------------------------------------|-------------------------|
| saof-r01-F1 | DBS01                | r01                                  | TGGCAACAACCAGAATGAAA    |
| saof-r01-R1 | DBS01                | r01                                  | CGCTATTCAGGCCGTTACTC    |
| saof-r01-F2 | DBS01                | r01                                  | AATCAACCGAAGAGGGGACT    |
| saof-r01-R2 | DBS01                | r01                                  | CACCTCTTCTTTTGCCTTCG    |
| saof-r02-F1 | DBS02                | r02                                  | CGCTCTCTCAGACGTTTCCA    |
| saof-r02-R1 | DBS02                | r02                                  | CGATTTTCGTTCCGCTGCTAC   |
| saof-r02-F2 | DBS02                | r02                                  | GGTTGGCATTGGGGAAGTCT    |
| saof-r02-R2 | DBS02                | r02                                  | TTGGGCTTTGCTCTTACCGA    |
| saof-r03-F1 | DBS03                | r47                                  | AGATACCTTCCCCCGGACTT    |
| saof-r03-R1 | DBS03                | r47                                  | CAATGGACTATGCCTGCTGC    |
| saof-r03-F2 | DBS03                | r47                                  | CCCTTAGCTTTTGGCGTTTCG   |
| saof-r03-R2 | DBS03                | r47                                  | GGAAGAGCGGAGCAGTCAAA    |

Table S4 Simple sequence repeats in the *S. officinalis* mitogenome. MC1/2: mitogenome chromosome 1/2.

[illegible]

Table S5 Detailed information of the simple sequence repeats in the *S. officinalis* mitogenome. MC1/2: mitogenome chromosome 1/2. The simple sequence repeats in the exonic regions of genes are highlighted with asterisks.

| Chromosome | ID     | Start  | End    | Repeat type | Repeat unit |
|------------|--------|--------|--------|-------------|-------------|
| MC1        | SSR1   | 2062   | 2073   | tetra-      | (ATTC)3     |
| MC1        | SSR2   | 9248   | 9259   | mono-       | (A)12       |
| MC1        | SSR3   | 15954  | 15965  | tetra-      | (TTTC)3     |
| MC1        | SSR4   | 22901  | 22915  | penta-      | (AAGAG)3    |
| MC1        | SSR5   | 27147  | 27158  | tetra-      | (TGCC)3     |
| MC1        | SSR6   | 29637  | 29648  | di-         | (CT)6       |
| MC1        | SSR7   | 29887  | 29896  | di-         | (CT)5       |
| MC1        | SSR8   | 41762  | 41773  | tetra-      | (GGTC)3     |
| MC1        | SSR9   | 43093  | 43107  | tri-        | (AAT)5      |
| MC1        | SSR10  | 47505  | 47516  | tetra-      | (CTTT)3     |
| MC1        | SSR11  | 49986  | 49997  | tri-        | (AGA)4      |
| MC1        | SSR12  | 51577  | 51588  | tetra-      | (CCAA)3     |
| MC1        | SSR13  | 53213  | 53224  | tetra-      | (AAGA)3     |
| MC1        | SSR14  | 57328  | 57339  | tri-        | (GAA)4      |
| MC1        | SSR15  | 60765  | 60774  | di-         | (TG)5       |
| MC1        | SSR16  | 63084  | 63093  | di-         | (TA)5       |
| MC1        | SSR17* | 66156  | 66167  | tetra-      | (TCTT)3     |
| MC1        | SSR18* | 72382  | 72396  | penta-      | (CTTTT)3    |
| MC1        | SSR19  | 74363  | 74377  | tri-        | (TTC)5      |
| MC1        | SSR20  | 81956  | 81967  | tetra-      | (GCTA)3     |
| MC1        | SSR21  | 83825  | 83842  | hexa-       | (TTAGAG)3   |
| MC1        | SSR22  | 84906  | 84917  | tri-        | (GAA)4      |
| MC1        | SSR23  | 91667  | 91681  | penta-      | (GAAAG)3    |
| MC1        | SSR24  | 92866  | 92877  | tetra-      | (AAGA)3     |
| MC1        | SSR25  | 97264  | 97281  | hexa-       | (TTTATA)3   |
| MC1        | SSR26  | 104007 | 104018 | tri-        | (TTA)4      |
| MC1        | SSR27  | 105009 | 105018 | di-         | (GA)5       |
| MC1        | SSR28  | 113445 | 113459 | penta-      | (AGCTA)3    |
| MC1        | SSR29  | 124448 | 124459 | tetra-      | (GAAA)3     |
| MC1        | SSR30  | 132713 | 132724 | tetra-      | (CCTC)3     |
| MC1        | SSR31  | 135514 | 135525 | tri-        | (AGT)4      |
| MC1        | SSR32  | 138876 | 138893 | hexa-       | (CTATTA)3   |
| MC1        | SSR33  | 142826 | 142837 | tetra-      | (GCTC)3     |
| MC1        | SSR34  | 147535 | 147546 | tri-        | (CTT)4      |
| MC1        | SSR35  | 148000 | 148011 | tetra-      | (GAAA)3     |
| MC1        | SSR36  | 148634 | 148645 | tetra-      | (AAAG)3     |
| MC1        | SSR37  | 152086 | 152095 | di-         | (CT)5       |
| MC1        | SSR38  | 153889 | 153900 | tri-        | (AGA)4      |
| MC1        | SSR39  | 165316 | 165327 | tetra-      | (TTTC)3     |



|     |        |        |        |        |           |
|-----|--------|--------|--------|--------|-----------|
| MC1 | SSR40  | 172992 | 173003 | tetra- | (CATT)3   |
| MC1 | SSR41  | 178918 | 178932 | tri-   | (TAT)5    |
| MC1 | SSR42* | 184739 | 184750 | tetra- | (CATT)3   |
| MC1 | SSR43  | 194172 | 194182 | mono-  | (T)11     |
| MC1 | SSR44  | 202376 | 202387 | di-    | (AG)6     |
| MC1 | SSR45  | 204811 | 204822 | tri-   | (CTA)4    |
| MC1 | SSR46  | 205986 | 205997 | tetra- | (TTTG)3   |
| MC1 | SSR47  | 209291 | 209302 | tetra- | (TAAA)3   |
| MC1 | SSR48  | 212121 | 212132 | tri-   | (ACT)4    |
| MC1 | SSR49  | 214541 | 214550 | di-    | (AG)5     |
| MC1 | SSR50  | 215994 | 216008 | penta- | (CAATA)3  |
| MC1 | SSR51  | 216372 | 216383 | tetra- | (TTTC)3   |
| MC1 | SSR52  | 217234 | 217245 | tetra- | (CTGG)3   |
| MC1 | SSR53  | 221348 | 221357 | di-    | (AG)5     |
| MC1 | SSR54  | 224542 | 224553 | tetra- | (GCCG)3   |
| MC1 | SSR55  | 236633 | 236650 | hexa-  | (TTTACA)3 |
| MC1 | SSR56  | 236833 | 236842 | mono-  | (T)10     |
| MC1 | SSR57  | 241691 | 241700 | di-    | (CT)5     |
| MC1 | SSR58* | 242042 | 242051 | mono-  | (T)10     |
| MC1 | SSR59* | 244673 | 244687 | penta- | (CTAGT)3  |
| MC1 | SSR60  | 247011 | 247022 | tri-   | (TAA)4    |
| MC1 | SSR61  | 247555 | 247566 | tetra- | (TCTT)3   |
| MC1 | SSR62  | 249767 | 249778 | tetra- | (AGAT)3   |
| MC1 | SSR63  | 252341 | 252350 | di-    | (AT)5     |
| MC1 | SSR64  | 255694 | 255705 | tetra- | (AGAA)3   |
| MC1 | SSR65  | 261609 | 261620 | tetra- | (TTCT)3   |
| MC1 | SSR66  | 263325 | 263336 | tetra- | (AAGC)3   |
| MC1 | SSR67  | 265540 | 265551 | tetra- | (AGAA)3   |
| MC2 | SSR68  | 830    | 839    | di-    | (TC)5     |
| MC2 | SSR69  | 5103   | 5112   | di-    | (AT)5     |
| MC2 | SSR70  | 9766   | 9775   | di-    | (TC)5     |
| MC2 | SSR71  | 18627  | 18641  | penta- | (TATAA)3  |
| MC2 | SSR72  | 20392  | 20403  | tetra- | (TCTA)3   |
| MC2 | SSR73* | 25215  | 25226  | tetra- | (AAGA)3   |
| MC2 | SSR74  | 25703  | 25714  | tetra- | (AATA)3   |
| MC2 | SSR75  | 26570  | 26581  | tetra- | (AGTG)3   |
| MC2 | SSR76  | 37406  | 37415  | mono-  | (A)10     |
| MC2 | SSR77  | 37494  | 37503  | mono-  | (A)10     |
| MC2 | SSR78  | 38492  | 38501  | mono-  | (A)10     |

---

Table S6 Long tandem repeats in the mitogenome of *S. officinalis*. The tandem repeats units in the exonic regions of genes were highlighted with the asterisks.

| Chromosomes | ID   | Indices       | Period size(bp) | Copy Number | Consensus Size (bp) | Percent Matches | Percent Indels | Score | Bases number |    |    |    | Entropy (0–2) |
|-------------|------|---------------|-----------------|-------------|---------------------|-----------------|----------------|-------|--------------|----|----|----|---------------|
|             |      |               |                 |             |                     |                 |                |       | A            | G  | C  | T  |               |
| MC1         | TR1  | 34927-35003   | 18              | 4.3         | 18                  | 90              | 6              | 102   | 33           | 6  | 25 | 33 | 1.82          |
| MC1         | TR2  | 34928-35003   | 36              | 2.1         | 36                  | 90              | 0              | 116   | 34           | 6  | 25 | 34 | 1.82          |
| MC1         | TR3  | 57560-57594   | 17              | 2           | 18                  | 88              | 5              | 54    | 25           | 20 | 31 | 22 | 1.98          |
| MC1         | TR4  | 66206-66278   | 33              | 2.3         | 31                  | 84              | 11             | 87    | 28           | 15 | 8  | 47 | 1.73          |
| MC1         | TR5  | 167466-167500 | 17              | 2           | 18                  | 94              | 5              | 63    | 48           | 22 | 0  | 28 | 1.51          |
| MC1         | TR6  | 167493-167538 | 23              | 2           | 23                  | 86              | 0              | 65    | 60           | 6  | 6  | 26 | 1.46          |
| MC1         | TR7  | 190941-190979 | 20              | 2           | 20                  | 84              | 0              | 51    | 69           | 7  | 17 | 5  | 1.32          |
| MC2         | TR8* | 25104-25176   | 33              | 2.3         | 31                  | 84              | 11             | 87    | 47           | 8  | 15 | 28 | 1.73          |
| MC2         | TR9  | 25792-25817   | 12              | 2.2         | 12                  | 100             | 0              | 52    | 19           | 30 | 7  | 42 | 1.79          |

Table S7 List of mitochondrial plastid DNA (MTPT) in the *S. officinalis* mitogenome. MC1/2: mitogenomic chromosomes 1/2.

| MTPT ID | Chromosome | Identity (%) | Alignment Length (bp) | Number of Mismatches | Number of Gap openings | Positions on the Chloroplast Genome |        | Positions on the Mitochondrial Genome |        | Genes Located in the MTPT Fragments | E value   | Score    |
|---------|------------|--------------|-----------------------|----------------------|------------------------|-------------------------------------|--------|---------------------------------------|--------|-------------------------------------|-----------|----------|
|         |            |              |                       |                      |                        | Start                               | End    | Start                                 | End    |                                     |           |          |
| mtpt01  | MC1        | 100          | 4261                  | 0                    | 0                      | 141708                              | 145968 | 37176                                 | 32916  | <i>ycf2</i> fragment, <i>ycf15</i>  | 0         | 7869     |
| mtpt02  | MC1        | 100          | 1447                  | 0                    | 0                      | 149035                              | 150481 | 55242                                 | 56688  | <i>rpl23</i> , <i>trnI</i> -CAU     | 0         | 2673     |
| mtpt03  | MC1        | 98.582       | 141                   | 2                    | 0                      | 36259                               | 36399  | 62423                                 | 62283  |                                     | 1.93E-65  | 250      |
| mtpt04  | MC1        | 98.485       | 66                    | 1                    | 0                      | 54329                               | 54394  | 64471                                 | 64536  |                                     | 2.04E-25  | 1.17E+02 |
| mtpt05  | MC1        | 94.118       | 85                    | 4                    | 1                      | 126934                              | 127017 | 105341                                | 105425 | <i>trnN</i> -GUU                    | 9.42E-29  | 1.28E+02 |
| mtpt06  | MC1        | 92           | 50                    | 3                    | 1                      | 134881                              | 134930 | 130404                                | 130452 |                                     | 5.79E-11  | 6.94E+01 |
| mtpt07  | MC1        | 93.75        | 80                    | 5                    | 0                      | 51266                               | 51345  | 136496                                | 136575 | <i>trnM</i> -CAU                    | 1.58E-26  | 1.21E+02 |
| mtpt08  | MC1        | 100          | 386                   | 0                    | 0                      | 43011                               | 43396  | 159908                                | 159523 |                                     | 0         | 7.13E+02 |
| mtpt09  | MC1        | 75.599       | 459                   | 100                  | 11                     | 10034                               | 10486  | 160245                                | 160697 |                                     | 1.95E-55  | 2.17E+02 |
| mtpt10  | MC1        | 79.705       | 882                   | 139                  | 31                     | 98634                               | 99497  | 166520                                | 165661 |                                     | 4.62E-171 | 6.01E+02 |
| mtpt11  | MC1        | 99.972       | 3598                  | 1                    | 0                      | 135731                              | 139328 | 167076                                | 170673 | <i>rps7</i>                         | 0         | 6.64E+03 |
| mtpt12  | MC1        | 100          | 41                    | 0                    | 0                      | 115938                              | 115978 | 168353                                | 168393 |                                     | 3.46E-13  | 7.68E+01 |
| mtpt13  | MC1        | 100          | 43                    | 0                    | 0                      | 55410                               | 55452  | 195019                                | 195061 |                                     | 2.67E-14  | 8.05E+01 |
| mtpt14  | MC1        | 97.531       | 81                    | 2                    | 0                      | 8                                   | 88     | 200038                                | 200118 | <i>trnH</i> -GUG                    | 4.35E-32  | 1.39E+02 |
| mtpt15  | MC1        | 89.313       | 131                   | 13                   | 1                      | 29441                               | 29570  | 218815                                | 218685 | <i>trnD</i> -GUC                    | 2.58E-39  | 1.63E+02 |
| mtpt16  | MC1        | 88.95        | 181                   | 16                   | 2                      | 44071                               | 44251  | 219338                                | 219514 |                                     | 1.51E-56  | 2.20E+02 |
| mtpt17  | MC1        | 78.889       | 90                    | 16                   | 3                      | 7827                                | 7915   | 219501                                | 219414 | <i>trnS</i> -GGA                    | 1.25E-07  | 5.84E+01 |

|        |     |        |      |    |   |       |       |        |        |                 |          |          |
|--------|-----|--------|------|----|---|-------|-------|--------|--------|-----------------|----------|----------|
| mtpt18 | MC1 | 87.64  | 178  | 11 | 4 | 44790 | 44967 | 219520 | 219686 |                 | 2.55E-49 | 1.96E+02 |
| mtpt19 | MC1 | 97.561 | 164  | 4  | 0 | 33546 | 33709 | 245207 | 245044 |                 | 6.83E-75 | 2.81E+02 |
| mtpt20 | MC1 | 100    | 1698 | 0  | 0 | 31491 | 33188 | 246897 | 245200 | <i>psbD</i>     | 0        | 3.14E+03 |
| mtpt21 | MC1 | 92.661 | 109  | 3  | 2 | 71222 | 71329 | 252451 | 252347 |                 | 5.59E-36 | 1.52E+02 |
| mtpt22 | MC2 | 100    | 196  | 0  | 0 | 65279 | 65474 | 11286  | 11481  | <i>trnP-UGG</i> | 2.4E-99  | 363      |
| mtpt23 | MC2 | 100    | 128  | 0  | 0 | 65075 | 65202 | 11110  | 11237  | <i>trnW-CCA</i> | 1.5E-61  | 237      |

---

Table S8 Summary of RNA editing sites detected in the PCGs of the *S. officinalis* mitogenome. “Nt Pos” and “AA Pos” mean the positions of the RNA editing sites in the nucleotide and amino acid sequences of the PCGs. P: the sequence was successfully validated by both PCR amplification and Sanger sequencing experiments. N: the sequence was successfully amplified by PCR but the Sanger sequencing results differed from those expected. NA: the sequence was not validated by PCR and Sanger sequencing experiments. The 193 sites of *S. officinalis* mitogenome homologous to those of the *S. miltiorrhiza* mitogenome are underlined.

| Gene | Nt Pos     | AA Pos | Reference Nt | Nt coverage | Nt Base Count [A,C,G,T] | Nt allsubs | Nt Frequency | Effect             | PCR Success | Codon Position |
|------|------------|--------|--------------|-------------|-------------------------|------------|--------------|--------------------|-------------|----------------|
| atp4 | 59         | 20     | C            | 4474        | [0, 31, 0, 4443]        | CT         | 0.99         | TCT (S) => TTT (F) | P           | 2              |
| atp4 | 71         | 24     | C            | 5250        | [1, 27, 0, 5222]        | CT CA      | 0.99         | TCA (S) => TTA (L) | P           | 2              |
| atp4 | <u>89</u>  | 30     | C            | 4834        | [0, 107, 0, 4727]       | CT         | 0.98         | TCA (S) => TTA (L) | P           | 2              |
| atp4 | 118        | 40     | C            | 5023        | [0, 18, 0, 5005]        | CT         | 1            | CGT (R) => TGT (C) | P           | 1              |
| atp4 | <u>215</u> | 72     | C            | 6007        | [1, 39, 0, 5967]        | CT CA      | 0.99         | TCG (S) => TTG (L) | P           | 2              |
| atp4 | 227        | 76     | C            | 6076        | [0, 84, 1, 5991]        | CT CG      | 0.99         | CCC (P) => CTC (L) | P           | 2              |
| atp4 | <u>248</u> | 83     | C            | 5278        | [0, 27, 0, 5251]        | CT         | 0.99         | CCT (P) => CTT (L) | P           | 2              |
| atp4 | <u>251</u> | 84     | C            | 5577        | [0, 37, 1, 5539]        | CT CG      | 0.99         | CCG (P) => CTG (L) | P           | 2              |
| atp4 | <u>395</u> | 132    | C            | 2771        | [0, 9, 0, 2762]         | CT         | 1            | TCA (S) => TTA (L) | P           | 2              |
| atp4 | <u>407</u> | 136    | C            | 2590        | [1, 5, 0, 2584]         | CT CA      | 1            | CCA (P) => CTA (L) | P           | 2              |
| atp4 | 416        | 139    | C            | 2323        | [0, 23, 0, 2300]        | CT         | 0.99         | ACT (T) => ATT (I) | P           | 2              |
| atp6 | <u>26</u>  | 9      | C            | 9490        | [1, 84, 0, 9405]        | CT CA      | 0.99         | TCA (S) => TTA (L) | NA          | 2              |
| atp6 | <u>77</u>  | 26     | C            | 10579       | [0, 30, 1, 10548]       | CT CG      | 1            | CCG (P) => CTG (L) | NA          | 2              |
| atp6 | <u>146</u> | 49     | C            | 8603        | [0, 53, 0, 8550]        | CT         | 0.99         | TCG (S) => TTG (L) | NA          | 2              |
| atp6 | 164        | 55     | C            | 8739        | [0, 78, 1, 8660]        | CT CG      | 0.99         | TCG (S) => TTG (L) | NA          | 2              |
| atp6 | 172        | 58     | C            | 7290        | [0, 14, 0, 7276]        | CT         | 1            | CGT (R) => TGT (C) | NA          | 1              |
| atp6 | <u>311</u> | 104    | C            | 10524       | [0, 41, 0, 10483]       | CT         | 1            | TCA (S) => TTA (L) | NA          | 2              |

|      |            |     |   |      |                    |       |      |                    |    |   |
|------|------------|-----|---|------|--------------------|-------|------|--------------------|----|---|
| atp6 | 370        | 124 | C | 9843 | [0, 32, 0, 9811]   | CT    | 1    | CCT (P) => TCT (S) | NA | 1 |
| atp6 | <u>373</u> | 125 | C | 9878 | [0, 48, 0, 9830]   | CT    | 1    | CAT (H) => TAT (Y) | NA | 1 |
| atp8 | 30         | 16  | C | 3042 | [0, 1434, 0, 1608] | CT    | 0.53 | TCA (S) => TTA (L) | NA | 2 |
| atp8 | 58         | 20  | C | 2774 | [0, 131, 1, 2642]  | CT CG | 0.95 | CTC (L) => TTC (F) | P  | 1 |
| atp9 | 212        | 71  | C | 1446 | [0, 5, 0, 1441]    | CT    | 1    | TCA (S) => TTA (L) | NA | 2 |
| ccmB | 28         | 10  | C | 57   | [0, 29, 0, 28]     | CT    | 0.49 | CAT (H) => TAT (Y) | NA | 1 |
| ccmB | <u>80</u>  | 27  | C | 30   | [0, 20, 0, 10]     | CT    | 0.33 | TCG (S) => TTG (L) | NA | 2 |
| ccmB | 87         | 87  | C | 39   | [0, 25, 0, 14]     | CT    | 0.36 | ATC (I) => ATT (I) | NA | 3 |
| ccmB | <u>128</u> | 43  | C | 34   | [4, 0, 30, 0]      | CT    | 0.12 | TCA (S) => TTA (L) | NA | 2 |
| ccmB | 286        | 96  | C | 36   | [0, 25, 0, 11]     | CT    | 0.31 | CGG (R) => TGG (W) | NA | 1 |
| ccmB | <u>304</u> | 102 | C | 38   | [0, 26, 0, 12]     | CT    | 0.32 | CGT (R) => TGT (C) | NA | 1 |
| ccmB | 313        | 105 | C | 40   | [0, 25, 0, 15]     | CT    | 0.38 | CGT (R) => TGT (C) | NA | 1 |
| ccmB | 338        | 113 | C | 39   | [0, 26, 0, 13]     | CT    | 0.33 | CCG (P) => CTG (L) | NA | 2 |
| ccmB | <u>367</u> | 123 | C | 39   | [0, 34, 0, 5]      | CT    | 0.13 | CGG (R) => TGG (W) | NA | 1 |
| ccmB | 380        | 127 | C | 37   | [0, 29, 0, 8]      | CT    | 0.22 | CCA (P) => CTA (L) | NA | 2 |
| ccmB | <u>424</u> | 142 | C | 25   | [0, 22, 0, 3]      | CT    | 0.12 | CGT (R) => TGT (C) | NA | 1 |
| ccmB | <u>428</u> | 143 | C | 27   | [0, 20, 0, 7]      | CT    | 0.26 | TCG (S) => TTG (L) | NA | 2 |
| ccmB | <u>551</u> | 184 | C | 7    | [1, 0, 6, 0]       | CT    | 0.14 | TCA (S) => TTA (L) | NA | 2 |
| ccmC | <u>38</u>  | 13  | C | 487  | [0, 40, 0, 447]    | CT    | 0.92 | TCA (S) => TTA (L) | NA | 2 |
| ccmC | 76         | 26  | C | 398  | [0, 12, 0, 386]    | CT    | 0.97 | CGG (R) => TGG (W) | NA | 1 |
| ccmC | <u>103</u> | 35  | C | 347  | [0, 5, 0, 342]     | CT    | 0.99 | CAT (H) => TAT (Y) | NA | 1 |
| ccmC | 115        | 39  | C | 305  | [0, 16, 0, 289]    | CT    | 0.95 | CGG (R) => TGG (W) | NA | 1 |
| ccmC | 133        | 45  | C | 310  | [0, 23, 0, 287]    | CT    | 0.93 | CTT (L) => TTT (F) | NA | 1 |
| ccmC | <u>161</u> | 54  | C | 235  | [0, 6, 0, 229]     | CT    | 0.97 | CCC (P) => CTC (L) | NA | 2 |
| ccmC | 179        | 60  | C | 194  | [0, 2, 0, 192]     | CT    | 0.99 | GCG (A) => GTG (V) | NA | 2 |
| ccmC | 184        | 62  | C | 195  | [0, 4, 0, 191]     | CT    | 0.98 | CGG (R) => TGG (W) | NA | 1 |

|       |            |     |   |     |                 |    |      |                    |    |   |
|-------|------------|-----|---|-----|-----------------|----|------|--------------------|----|---|
| ccmC  | 253        | 85  | C | 139 | [0, 124, 0, 15] | CT | 0.11 | CTT (L) => TTT (F) | NA | 1 |
| ccmC  | 281        | 94  | C | 65  | [0, 8, 0, 57]   | CT | 0.88 | ACA (T) => ATA (I) | NA | 2 |
| ccmC  | <u>299</u> | 100 | C | 41  | [0, 21, 0, 20]  | CT | 0.49 | TCT (S) => TTT (F) | NA | 2 |
| ccmC  | <u>331</u> | 111 | C | 27  | [0, 11, 0, 16]  | CT | 0.59 | CGG (R) => TGG (W) | NA | 1 |
| ccmC  | <u>395</u> | 132 | C | 18  | [0, 14, 0, 4]   | CT | 0.22 | TCG (S) => TTG (L) | NA | 2 |
| ccmC  | 399        | 133 | C | 18  | [0, 10, 0, 8]   | CT | 0.44 | TTC (F) => TTT (F) | NA | 3 |
| ccmC  | 400        | 134 | C | 18  | [0, 14, 0, 4]   | CT | 0.22 | CTT (L) => TTT (F) | NA | 1 |
| ccmC  | <u>436</u> | 146 | C | 16  | [0, 13, 0, 3]   | CT | 0.19 | CCT (P) => TCT (S) | NA | 1 |
| ccmC  | 446        | 149 | C | 15  | [0, 13, 0, 2]   | CT | 0.13 | CCG (P) => CTG (L) | NA | 2 |
| ccmC  | 458        | 153 | C | 14  | [0, 12, 0, 2]   | CT | 0.14 | TCA (S) => TTA (L) | NA | 2 |
| ccmC  | <u>548</u> | 183 | C | 4   | [0, 3, 0, 1]    | CT | 0.25 | TCT (S) => TTT (F) | NA | 2 |
| ccmC  | <u>568</u> | 190 | C | 4   | [0, 3, 0, 1]    | CT | 0.25 | CCT (P) => TCT (S) | NA | 1 |
| ccmC  | 575        | 192 | C | 4   | [0, 3, 0, 1]    | CT | 0.25 | CCC (P) => CTC (L) | NA | 2 |
| ccmC  | 605        | 202 | C | 4   | [0, 3, 0, 1]    | CT | 0.25 | TCC (S) => TTC (F) | NA | 2 |
| ccmC  | <u>608</u> | 203 | C | 4   | [0, 0, 0, 4]    | CT | 1    | CCC (P) => CTC (L) | NA | 2 |
| ccmC  | 614        | 205 | C | 4   | [0, 1, 0, 3]    | CT | 0.75 | TCA (S) => TTA (L) | NA | 2 |
| ccmC  | <u>650</u> | 217 | C | 4   | [0, 0, 0, 4]    | CT | 1    | CCT (P) => CTT (L) | NA | 2 |
| ccmC  | 673        | 225 | C | 4   | [0, 1, 0, 3]    | CT | 0.75 | CCT (P) => TCT (S) | NA | 1 |
| ccmFc | <u>16</u>  | 6   | C | 319 | [0, 270, 0, 49] | CT | 0.15 | CAC (H) => TAC (Y) | NA | 1 |
| ccmFc | <u>38</u>  | 13  | C | 312 | [0, 25, 0, 287] | CT | 0.92 | TCC (S) => TTC (F) | NA | 2 |
| ccmFc | 50         | 17  | C | 247 | [0, 15, 0, 232] | CT | 0.94 | CCT (P) => CTT (L) | NA | 2 |
| ccmFc | 52         | 18  | C | 263 | [0, 22, 0, 241] | CT | 0.92 | CGT (R) => TGT (C) | NA | 1 |
| ccmFc | <u>103</u> | 35  | C | 288 | [0, 5, 0, 283]  | CT | 0.98 | CCC (P) => TCC (S) | NA | 1 |
| ccmFc | 122        | 41  | C | 360 | [0, 13, 0, 347] | CT | 0.96 | TCC (S) => TTC (F) | NA | 2 |
| ccmFc | <u>146</u> | 49  | C | 363 | [0, 2, 0, 361]  | CT | 0.99 | CCT (P) => CTT (L) | NA | 2 |
| ccmFc | <u>151</u> | 51  | C | 370 | [0, 5, 0, 365]  | CT | 0.99 | CCT (P) => TCT (S) | NA | 1 |

|       |            |     |   |      |                   |       |      |                    |    |   |
|-------|------------|-----|---|------|-------------------|-------|------|--------------------|----|---|
| ccmFc | <u>155</u> | 52  | C | 370  | [0, 15, 0, 355]   | CT    | 0.96 | TCA (S) => TTA (L) | NA | 2 |
| ccmFc | 310        | 104 | C | 479  | [0, 9, 0, 470]    | CT    | 0.98 | CGT (R) => TGT (C) | NA | 1 |
| ccmFc | 321        | 107 | C | 503  | [0, 422, 0, 81]   | CT    | 0.16 | CCC (P) => CCT (P) | NA | 3 |
| ccmFc | 334        | 112 | C | 455  | [0, 175, 0, 280]  | CT    | 0.62 | CTT (L) => TTT (F) | NA | 1 |
| ccmFc | <u>378</u> | 126 | C | 397  | [0, 131, 0, 266]  | CT    | 0.67 | TTC (F) => TTT (F) | NA | 3 |
| ccmFc | 390        | 130 | C | 431  | [0, 389, 0, 42]   | CT    | 0.1  | CTC (L) => CTT (L) | NA | 3 |
| ccmFc | 406        | 136 | C | 437  | [0, 15, 0, 422]   | CT    | 0.97 | CGT (R) => TGT (C) | NA | 1 |
| ccmFc | 1228       | 410 | C | 64   | [0, 2, 0, 62]     | CT    | 0.97 | CGG (R) => TGG (W) | NA | 1 |
| ccmFc | 1233       | 411 | C | 61   | [0, 55, 0, 6]     | CT    | 0.1  | ATC (I) => ATT (I) | NA | 3 |
| ccmFn | <u>38</u>  | 13  | C | 1934 | [0, 8, 0, 1926]   | CT    | 1    | CCG (P) => CTG (L) | NA | 2 |
| ccmFn | <u>98</u>  | 33  | C | 1456 | [0, 157, 0, 1299] | CT    | 0.89 | CCT (P) => CTT (L) | NA | 2 |
| ccmFn | <u>137</u> | 46  | C | 727  | [0, 51, 0, 676]   | CT    | 0.93 | TCG (S) => TTG (L) | NA | 2 |
| ccmFn | 142        | 48  | C | 772  | [0, 70, 0, 702]   | CT    | 0.91 | CGT (R) => TGT (C) | NA | 1 |
| ccmFn | <u>151</u> | 51  | C | 763  | [0, 100, 0, 663]  | CT    | 0.87 | CCT (P) => TCT (S) | NA | 1 |
| ccmFn | 165        | 55  | C | 750  | [0, 609, 0, 141]  | CT    | 0.19 | TCC (S) => TCT (S) | NA | 3 |
| ccmFn | <u>248</u> | 83  | C | 1184 | [0, 60, 0, 1124]  | CT    | 0.95 | TCA (S) => TTA (L) | NA | 2 |
| ccmFn | 256        | 86  | C | 1305 | [0, 52, 0, 1253]  | CT    | 0.96 | CGG (R) => TGG (W) | NA | 1 |
| ccmFn | 283        | 95  | C | 1315 | [0, 42, 0, 1273]  | CT    | 0.97 | CTT (L) => TTT (F) | NA | 1 |
| ccmFn | 371        | 124 | C | 1198 | [0, 34, 0, 1164]  | CT    | 0.97 | TCG (S) => TTG (L) | NA | 2 |
| ccmFn | <u>378</u> | 126 | C | 1173 | [1, 179, 0, 993]  | CT CA | 0.85 | TTC (F) => TTT (F) | NA | 3 |
| ccmFn | <u>713</u> | 238 | C | 631  | [1, 27, 0, 603]   | CT CA | 0.96 | CCT (P) => CTT (L) | NA | 2 |
| ccmFn | 722        | 241 | C | 612  | [0, 60, 0, 552]   | CT    | 0.9  | TCA (S) => TTA (L) | NA | 2 |
| ccmFn | 732        | 244 | C | 640  | [0, 481, 0, 159]  | CT    | 0.25 | TCC (S) => TCT (S) | NA | 3 |
| ccmFn | 760        | 254 | C | 761  | [1, 25, 0, 735]   | CT CA | 0.97 | CGT (R) => TGT (C) | NA | 1 |
| ccmFn | 782        | 261 | C | 866  | [0, 76, 0, 790]   | CT    | 0.91 | TCA (S) => TTA (L) | NA | 2 |
| ccmFn | 794        | 265 | C | 983  | [0, 45, 0, 938]   | CT    | 0.95 | CCA (P) => CTA (L) | NA | 2 |



|       |            |     |   |      |                    |       |      |                    |    |   |
|-------|------------|-----|---|------|--------------------|-------|------|--------------------|----|---|
| ccmFn | <u>809</u> | 270 | C | 985  | [0, 48, 0, 937]    | CT    | 0.95 | TCA (S) => TTA (L) | NA | 2 |
| ccmFn | 867        | 289 | C | 1158 | [0, 420, 0, 738]   | CT    | 0.64 | GGC (G) => GGT (G) | NA | 3 |
| ccmFn | <u>958</u> | 320 | C | 1275 | [0, 37, 0, 1238]   | CT    | 0.97 | CGC (R) => TGC (C) | NA | 1 |
| ccmFn | 1276       | 426 | C | 886  | [0, 62, 0, 824]    | CT    | 0.93 | CGG (R) => TGG (W) | NA | 1 |
| ccmFn | 1304       | 435 | C | 892  | [0, 56, 0, 836]    | CT    | 0.94 | CCA (P) => CTA (L) | NA | 2 |
| ccmFn | 1321       | 441 | C | 970  | [0, 60, 0, 910]    | CT    | 0.94 | CAT (H) => TAT (Y) | NA | 1 |
| ccmFn | 1336       | 446 | C | 957  | [0, 57, 0, 900]    | CT    | 0.94 | CGG (R) => TGG (W) | NA | 1 |
| ccmFn | 1354       | 452 | C | 1161 | [0, 71, 0, 1090]   | CT    | 0.94 | CGG (R) => TGG (W) | NA | 1 |
| ccmFn | 1387       | 463 | C | 1292 | [0, 64, 0, 1228]   | CT    | 0.95 | CGG (R) => TGG (W) | NA | 1 |
| ccmFn | 1448       | 483 | C | 1704 | [0, 19, 0, 1685]   | CT    | 0.99 | TCC (S) => TTC (F) | NA | 2 |
| ccmFn | 1472       | 491 | C | 1660 | [0, 27, 0, 1633]   | CT    | 0.98 | CCA (P) => CTA (L) | NA | 2 |
| ccmFn | 1484       | 495 | C | 1597 | [0, 30, 0, 1567]   | CT    | 0.98 | TCA (S) => TTA (L) | NA | 2 |
| ccmFn | 1519       | 507 | C | 1212 | [0, 28, 0, 1184]   | CT    | 0.98 | CCC (P) => TCC (S) | NA | 1 |
| cob   | 114        | 38  | C | 4575 | [1, 3354, 0, 1220] | CT CA | 0.27 | TTC (F) => TTT (F) | NA | 3 |
| cob   | 180        | 60  | C | 4081 | [0, 3256, 0, 825]  | CT    | 0.2  | TAC (Y) => TAT (Y) | NA | 3 |
| cob   | <u>298</u> | 100 | C | 3977 | [0, 26, 0, 3951]   | CT    | 0.99 | CAC (H) => TAC (Y) | NA | 1 |
| cob   | 325        | 109 | C | 3603 | [0, 35, 0, 3568]   | CT    | 0.99 | CAT (H) => TAT (Y) | NA | 1 |
| cob   | 358        | 120 | C | 3628 | [0, 49, 1, 3578]   | CT CG | 0.99 | CGG (R) => TGG (W) | NA | 1 |
| cob   | <u>568</u> | 190 | C | 3727 | [0, 32, 0, 3695]   | CT    | 0.99 | CAT (H) => TAT (Y) | NA | 1 |
| cob   | 853        | 285 | C | 5247 | [0, 36, 0, 5211]   | CT    | 0.99 | CAT (H) => TAT (Y) | NA | 1 |
| cob   | 908        | 303 | C | 4047 | [0, 36, 0, 4011]   | CT    | 0.99 | TCA (S) => TTA (L) | NA | 2 |
| cob   | 982        | 328 | C | 2417 | [0, 163, 0, 2254]  | CT    | 0.93 | CAC (H) => TAC (Y) | NA | 1 |
| cob   | 1015       | 339 | C | 1949 | [0, 39, 0, 1910]   | CT    | 0.98 | CGC (R) => TGC (C) | NA | 1 |
| cob   | 1084       | 362 | C | 1072 | [0, 19, 0, 1053]   | CT    | 0.98 | CCT (P) => TCT (S) | NA | 1 |
| cob   | 1160       | 387 | C | 393  | [0, 264, 0, 129]   | CT    | 0.33 | ACG (P) => ATG (M) | NA | 2 |
| cox1  | <u>242</u> | 81  | C | 6994 | [0, 27, 0, 6967]   | CT    | 1    | TCT (S) => TTT (F) | P  | 2 |

|      |            |     |   |      |                    |    |      |                    |    |   |
|------|------------|-----|---|------|--------------------|----|------|--------------------|----|---|
| cox1 | <u>254</u> | 85  | C | 8482 | [0, 31, 0, 8451]   | CT | 1    | TCT (S) => TTT (F) | P  | 2 |
| cox1 | <u>452</u> | 151 | C | 3351 | [0, 11, 0, 3340]   | CT | 1    | TCT (S) => TTT (F) | P  | 2 |
| cox1 | 515        | 172 | C | 1820 | [0, 5, 0, 1815]    | CT | 1    | TCC (S) => TTC (F) | P  | 2 |
| cox1 | <u>551</u> | 184 | C | 1139 | [0, 5, 0, 1134]    | CT | 1    | TCA (S) => TTA (L) | P  | 2 |
| cox1 | 590        | 197 | C | 578  | [0, 3, 0, 575]     | CT | 0.99 | CCA (P) => CTA (L) | P  | 2 |
| cox1 | 715        | 239 | C | 48   | [0, 0, 0, 48]      | CT | 1    | CGG (R) => TGG (W) | P  | 1 |
| cox1 | 761        | 254 | C | 2262 | [0, 48, 0, 2214]   | CT | 0.98 | TCC (S) => TTC (F) | N  | 2 |
| cox1 | 1078       | 360 | C | 8275 | [0, 6261, 0, 2014] | CT | 0.24 | CTG (L) => TTG (L) | N  | 1 |
| cox1 | 1186       | 396 | C | 9741 | [0, 5, 0, 9736]    | CT | 1    | CAC (H) => TAC (Y) | P  | 1 |
| cox1 | 1405       | 469 | C | 4684 | [0, 30, 0, 4654]   | CT | 0.99 | CGT (R) => TGT (C) | P  | 1 |
| cox1 | 1413       | 471 | C | 4508 | [0, 2153, 0, 2355] | CT | 0.52 | TTC (F) => TTT (F) | N  | 3 |
| cox1 | 1433       | 478 | C | 3399 | [0, 14, 0, 3385]   | CT | 1    | TCA (S) => TTA (L) | P  | 2 |
| cox1 | 1489       | 497 | C | 1439 | [0, 6, 0, 1433]    | CT | 1    | CCA (P) => TCA (S) | N  | 1 |
| cox1 | 1499       | 500 | C | 1238 | [0, 11, 0, 1227]   | CT | 0.99 | CCA (P) => CTA (L) | P  | 2 |
| cox2 | <u>47</u>  | 16  | C | 5613 | [0, 63, 0, 5550]   | CT | 0.99 | TCT (S) => TTT (F) | NA | 2 |
| cox2 | <u>419</u> | 140 | C | 3296 | [0, 72, 0, 3224]   | CT | 0.98 | ACG (P) => ATG (M) | NA | 2 |
| cox2 | 437        | 146 | C | 2919 | [0, 118, 0, 2801]  | CT | 0.96 | CCA (P) => CTA (L) | NA | 2 |
| cox2 | <u>452</u> | 151 | C | 2567 | [0, 131, 0, 2436]  | CT | 0.95 | TCA (S) => TTA (L) | NA | 2 |
| cox2 | 520        | 174 | C | 872  | [0, 31, 0, 841]    | CT | 0.96 | CCT (P) => TCT (S) | NA | 1 |
| cox2 | 533        | 178 | C | 664  | [0, 34, 0, 630]    | CT | 0.95 | CCT (P) => CTT (L) | NA | 2 |
| cox2 | 595        | 199 | C | 228  | [58, 170, 0, 0]    | CA | 0.25 | CAG (Q) => AAG (K) | NA | 1 |
| cox2 | <u>608</u> | 203 | C | 161  | [0, 2, 0, 159]     | CT | 0.99 | TCG (S) => TTG (L) | NA | 2 |
| cox2 | 697        | 233 | C | 44   | [0, 3, 0, 41]      | CT | 0.93 | CCT (P) => TCT (S) | NA | 1 |
| cox2 | 718        | 240 | C | 53   | [0, 5, 0, 48]      | CT | 0.91 | CGG (R) => TGG (W) | NA | 1 |
| cox3 | 174        | 58  | C | 4400 | [0, 3807, 0, 593]  | CT | 0.13 | TTC (F) => TTT (F) | N  | 3 |
| cox3 | 245        | 82  | C | 3733 | [0, 32, 0, 3701]   | CT | 0.99 | CCT (P) => CTT (L) | P  | 2 |

|      |             |     |   |      |                    |       |      |                    |    |   |
|------|-------------|-----|---|------|--------------------|-------|------|--------------------|----|---|
| cox3 | <u>304</u>  | 102 | C | 2928 | [0, 32, 3, 2893]   | CT CG | 0.99 | CGG (R) => TGG (W) | P  | 1 |
| cox3 | <u>311</u>  | 104 | C | 2931 | [0, 120, 2, 2809]  | CT CG | 0.96 | TCT (S) => TTT (F) | P  | 2 |
| cox3 | 314         | 105 | C | 2893 | [0, 56, 0, 2837]   | CT    | 0.98 | TCT (S) => TTT (F) | P  | 2 |
| cox3 | <u>419</u>  | 140 | C | 5644 | [0, 50, 0, 5594]   | CT    | 0.99 | CCC (P) => CTC (L) | P  | 2 |
| cox3 | 422         | 141 | C | 5327 | [0, 93, 0, 5234]   | CT    | 0.98 | CCT (P) => CTT (L) | P  | 2 |
| cox3 | 566         | 189 | C | 8247 | [1, 110, 0, 8136]  | CT CA | 0.99 | TCC (S) => TTC (F) | P  | 2 |
| cox3 | 567         | 189 | C | 8377 | [0, 4704, 0, 3673] | CT    | 0.44 | TCC (S) => TTT (F) | N  | 3 |
| cox3 | 754         | 252 | C | 697  | [0, 7, 0, 690]     | CT    | 0.99 | CGG (R) => TGG (W) | P  | 1 |
| cox3 | 764         | 255 | C | 627  | [0, 16, 0, 611]    | CT    | 0.97 | CCA (P) => CTA (L) | P  | 2 |
| matR | 32          | 11  | C | 1325 | [0, 31, 0, 1294]   | CT    | 0.98 | TCC (S) => TTC (F) | NA | 2 |
| matR | 43          | 15  | C | 1270 | [0, 54, 0, 1216]   | CT    | 0.96 | CCC (P) => TCC (S) | NA | 1 |
| matR | 237         | 79  | C | 317  | [0, 276, 0, 41]    | CT    | 0.13 | TCC (S) => TCT (S) | NA | 3 |
| matR | <u>254</u>  | 85  | C | 327  | [0, 251, 0, 76]    | CT    | 0.23 | TCC (S) => TTC (F) | NA | 2 |
| matR | 258         | 86  | C | 341  | [0, 261, 0, 80]    | CT    | 0.23 | GCC (A) => GCT (A) | NA | 3 |
| matR | 326         | 109 | C | 375  | [0, 15, 0, 360]    | CT    | 0.96 | CCA (P) => CTA (L) | NA | 2 |
| matR | 413         | 138 | C | 362  | [0, 18, 0, 344]    | CT    | 0.95 | TCG (S) => TTG (L) | NA | 2 |
| matR | <u>1400</u> | 467 | C | 939  | [0, 799, 0, 140]   | CT    | 0.15 | TCG (S) => TTG (L) | NA | 2 |
| matR | 1522        | 508 | C | 996  | [0, 799, 0, 197]   | CT    | 0.2  | CCC (P) => TCT (S) | NA | 1 |
| matR | 1524        | 508 | C | 1009 | [0, 778, 0, 231]   | CT    | 0.23 | CCC (P) => TCT (S) | NA | 3 |
| matR | 1658        | 553 | C | 1363 | [0, 37, 0, 1326]   | CT    | 0.97 | TCC (S) => TTC (F) | NA | 2 |
| matR | 1679        | 560 | C | 1133 | [0, 59, 0, 1074]   | CT    | 0.95 | CCT (P) => CTT (L) | NA | 2 |
| matR | 1699        | 567 | C | 1004 | [0, 63, 0, 941]    | CT    | 0.94 | CGC (R) => TGC (C) | NA | 1 |
| matR | 1713        | 571 | C | 1011 | [0, 258, 0, 753]   | CT    | 0.74 | TAC (Y) => TAT (Y) | NA | 3 |
| matR | 1735        | 579 | C | 937  | [0, 49, 0, 888]    | CT    | 0.95 | CAC (H) => TAC (Y) | NA | 1 |
| matR | 1766        | 589 | C | 793  | [0, 29, 0, 764]    | CT    | 0.96 | CCG (P) => CTG (L) | NA | 2 |
| matR | 1805        | 602 | C | 698  | [0, 29, 0, 669]    | CT    | 0.96 | CCA (P) => CTA (L) | NA | 2 |

|      |            |     |   |     |                  |    |      |                    |    |   |
|------|------------|-----|---|-----|------------------|----|------|--------------------|----|---|
| matR | 1823       | 608 | C | 586 | [0, 30, 0, 556]  | CT | 0.95 | TCA (S) => TTA (L) | NA | 2 |
| mttB | <u>16</u>  | 6   | C | 310 | [0, 207, 0, 103] | CT | 0.33 | CAT (H) => TAT (Y) | P  | 1 |
| mttB | <u>26</u>  | 9   | C | 339 | [0, 73, 0, 266]  | CT | 0.78 | CCG (P) => CTG (L) | P  | 2 |
| mttB | <u>64</u>  | 22  | C | 319 | [0, 28, 0, 291]  | CT | 0.91 | CGG (R) => TGG (W) | P  | 1 |
| mttB | <u>100</u> | 34  | C | 176 | [0, 75, 0, 101]  | CT | 0.57 | CGT (R) => TGT (C) | P  | 1 |
| mttB | 112        | 38  | C | 154 | [0, 46, 0, 108]  | CT | 0.7  | CCG (P) => TCG (S) | P  | 1 |
| mttB | <u>128</u> | 43  | C | 115 | [0, 72, 0, 43]   | CT | 0.37 | TCT (S) => TTT (F) | P  | 2 |
| mttB | 131        | 44  | C | 108 | [0, 50, 0, 58]   | CT | 0.54 | CCA (P) => CTA (L) | P  | 2 |
| mttB | 178        | 60  | C | 158 | [0, 20, 0, 138]  | CT | 0.87 | CGT (R) => TGT (C) | P  | 1 |
| mttB | <u>188</u> | 63  | C | 160 | [0, 26, 0, 134]  | CT | 0.84 | TCA (S) => TTA (L) | P  | 2 |
| mttB | 201        | 67  | C | 173 | [0, 150, 0, 23]  | CT | 0.13 | TTC (F) => TTT (F) | N  | 3 |
| mttB | 202        | 68  | C | 172 | [0, 51, 0, 121]  | CT | 0.7  | CCG (P) => TCG (S) | P  | 1 |
| mttB | 236        | 79  | C | 184 | [0, 93, 0, 91]   | CT | 0.49 | TCT (S) => TTT (F) | P  | 2 |
| mttB | 262        | 88  | C | 192 | [0, 16, 0, 176]  | CT | 0.92 | CAT (H) => TAT (Y) | P  | 1 |
| mttB | <u>328</u> | 110 | C | 112 | [0, 49, 0, 63]   | CT | 0.56 | CTC (L) => TTC (F) | P  | 1 |
| mttB | <u>331</u> | 111 | C | 112 | [0, 23, 0, 89]   | CT | 0.79 | CAT (H) => TAT (Y) | P  | 1 |
| mttB | <u>344</u> | 115 | C | 98  | [0, 58, 0, 40]   | CT | 0.41 | TCT (S) => TTT (F) | P  | 2 |
| mttB | 346        | 116 | C | 102 | [0, 34, 0, 68]   | CT | 0.67 | CGC (R) => TGC (C) | P  | 1 |
| mttB | <u>373</u> | 125 | C | 80  | [0, 56, 0, 24]   | CT | 0.3  | CTT (L) => TTT (F) | P  | 1 |
| mttB | <u>376</u> | 126 | C | 74  | [0, 21, 0, 53]   | CT | 0.72 | CCC (P) => TCC (S) | P  | 1 |
| mttB | 379        | 127 | C | 84  | [0, 56, 0, 28]   | CT | 0.33 | CGG (R) => TGG (W) | P  | 1 |
| mttB | <u>407</u> | 136 | C | 347 | [0, 10, 0, 337]  | CT | 0.97 | CCA (P) => CTA (L) | P  | 2 |
| mttB | 472        | 158 | C | 573 | [0, 16, 0, 557]  | CT | 0.97 | CAT (H) => TAT (Y) | P  | 1 |
| mttB | <u>497</u> | 166 | C | 617 | [0, 26, 0, 591]  | CT | 0.96 | TCG (S) => TTG (L) | P  | 2 |
| mttB | 505        | 169 | C | 635 | [0, 26, 0, 609]  | CT | 0.96 | CCA (P) => TCA (S) | P  | 1 |
| mttB | 541        | 181 | C | 517 | [0, 46, 0, 471]  | CT | 0.91 | CGT (R) => TGT (C) | P  | 1 |

|      |            |     |   |     |                  |    |      |                    |    |   |
|------|------------|-----|---|-----|------------------|----|------|--------------------|----|---|
| mttB | 554        | 185 | C | 365 | [0, 85, 0, 280]  | CT | 0.77 | CCA (P) => CTA (L) | P  | 2 |
| mttB | <u>578</u> | 193 | C | 245 | [0, 37, 0, 208]  | CT | 0.85 | TCC (S) => TTC (F) | P  | 2 |
| mttB | 610        | 204 | C | 152 | [0, 6, 0, 146]   | CT | 0.96 | CCG (P) => TCG (S) | P  | 1 |
| mttB | 616        | 206 | C | 149 | [0, 17, 0, 132]  | CT | 0.89 | CTC (L) => TTC (F) | P  | 1 |
| mttB | 667        | 223 | C | 73  | [0, 5, 0, 68]    | CT | 0.93 | CGT (R) => TGT (C) | P  | 1 |
| mttB | 672        | 224 | C | 128 | [0, 19, 0, 109]  | CT | 0.85 | TTC (F) => TTT (F) | N  | 3 |
| mttB | <u>713</u> | 238 | C | 97  | [0, 4, 0, 93]    | CT | 0.96 | TCG (S) => TTG (L) | P  | 2 |
| nad1 | <u>215</u> | 72  | C | 642 | [0, 17, 0, 625]  | CT | 0.97 | TCC (S) => TTC (F) | NA | 2 |
| nad1 | 265        | 89  | C | 324 | [0, 13, 0, 311]  | CT | 0.96 | CGG (R) => TGG (W) | NA | 1 |
| nad1 | <u>307</u> | 103 | C | 114 | [0, 3, 0, 111]   | CT | 0.97 | CCG (P) => TTG (S) | NA | 1 |
| nad1 | <u>308</u> | 103 | C | 108 | [0, 1, 0, 107]   | CT | 0.99 | CCG (P) => TTG (L) | NA | 2 |
| nad1 | <u>376</u> | 126 | C | 40  | [0, 0, 0, 40]    | CT | 1    | CGG (R) => TGG (W) | NA | 1 |
| nad1 | <u>401</u> | 134 | C | 43  | [0, 11, 0, 32]   | CT | 0.74 | TCT (S) => TTT (F) | NA | 2 |
| nad1 | <u>436</u> | 146 | C | 28  | [0, 6, 0, 22]    | CT | 0.79 | CCT (P) => TCT (S) | NA | 1 |
| nad1 | 490        | 164 | C | 48  | [0, 22, 0, 26]   | CT | 0.54 | CCC (P) => TCT (S) | NA | 1 |
| nad1 | 492        | 164 | C | 46  | [0, 36, 0, 10]   | CT | 0.22 | CCC (P) => TCT (S) | NA | 3 |
| nad1 | 493        | 165 | C | 43  | [0, 11, 0, 32]   | CT | 0.74 | CGT (R) => TGT (C) | NA | 1 |
| nad1 | 500        | 167 | C | 47  | [0, 11, 0, 36]   | CT | 0.77 | TCG (S) => TTG (L) | NA | 2 |
| nad1 | 536        | 179 | C | 47  | [0, 6, 0, 41]    | CT | 0.87 | TCC (S) => TTC (F) | NA | 2 |
| nad1 | 635        | 212 | C | 13  | [0, 3, 0, 10]    | CT | 0.77 | TCA (S) => TTA (L) | NA | 2 |
| nad1 | <u>725</u> | 242 | C | 258 | [0, 30, 0, 228]  | CT | 0.88 | CCA (P) => CTA (L) | NA | 2 |
| nad1 | 734        | 245 | C | 279 | [0, 73, 0, 206]  | CT | 0.74 | TCG (S) => TTG (L) | NA | 2 |
| nad1 | <u>740</u> | 247 | C | 271 | [0, 67, 0, 204]  | CT | 0.75 | TCT (S) => TTT (F) | NA | 2 |
| nad1 | 743        | 248 | C | 275 | [0, 66, 0, 209]  | CT | 0.76 | CCA (P) => CTA (L) | NA | 2 |
| nad1 | 755        | 252 | C | 587 | [0, 160, 0, 427] | CT | 0.73 | CCG (P) => CTG (L) | NA | 2 |
| nad1 | 779        | 260 | C | 817 | [0, 68, 0, 749]  | CT | 0.92 | TCC (S) => TTC (F) | NA | 2 |

|      |             |     |   |      |                  |    |      |                    |    |   |
|------|-------------|-----|---|------|------------------|----|------|--------------------|----|---|
| nad1 | 792         | 264 | C | 956  | [0, 455, 0, 501] | CT | 0.52 | CCC (P) => CCT (P) | NA | 3 |
| nad1 | 823         | 275 | C | 1072 | [0, 18, 0, 1054] | CT | 0.98 | CTC (L) => TTC (F) | NA | 1 |
| nad1 | 898         | 300 | C | 1042 | [0, 17, 0, 1025] | CT | 0.98 | CGG (R) => TGG (W) | NA | 1 |
| nad1 | 909         | 303 | C | 832  | [0, 395, 0, 437] | CT | 0.53 | TTC (F) => TTT (F) | NA | 3 |
| nad1 | <u>928</u>  | 310 | C | 613  | [0, 12, 0, 601]  | CT | 0.98 | CGG (R) => TGG (W) | NA | 1 |
| nad2 | <u>26</u>   | 9   | C | 147  | [0, 6, 0, 141]   | CT | 0.96 | TCC (S) => TTC (F) | NA | 2 |
| nad2 | 223         | 75  | C | 550  | [0, 14, 0, 536]  | CT | 0.97 | CTT (L) => TTT (F) | NA | 1 |
| nad2 | 252         | 84  | C | 541  | [0, 159, 0, 382] | CT | 0.71 | TTC (F) => TTT (F) | NA | 3 |
| nad2 | 303         | 101 | C | 301  | [0, 117, 0, 184] | CT | 0.61 | TTC (F) => TTT (F) | NA | 3 |
| nad2 | <u>308</u>  | 103 | C | 266  | [0, 24, 0, 242]  | CT | 0.91 | TCT (S) => TTT (F) | NA | 2 |
| nad2 | <u>311</u>  | 104 | C | 265  | [0, 38, 0, 227]  | CT | 0.86 | TCC (S) => TTC (F) | NA | 2 |
| nad2 | 356         | 119 | C | 136  | [0, 15, 0, 121]  | CT | 0.89 | CCA (P) => CTA (L) | NA | 2 |
| nad2 | 361         | 121 | C | 130  | [0, 15, 0, 115]  | CT | 0.88 | CCT (P) => TCT (S) | NA | 1 |
| nad2 | <u>367</u>  | 123 | C | 125  | [0, 19, 0, 106]  | CT | 0.85 | CGC (R) => TGC (C) | NA | 1 |
| nad2 | <u>401</u>  | 134 | C | 105  | [0, 19, 0, 86]   | CT | 0.82 | TCA (S) => TTA (L) | NA | 2 |
| nad2 | <u>428</u>  | 143 | C | 92   | [0, 16, 0, 76]   | CT | 0.83 | CCT (P) => CTT (L) | NA | 2 |
| nad2 | <u>497</u>  | 166 | C | 39   | [0, 6, 0, 33]    | CT | 0.85 | TCG (S) => TTG (L) | NA | 2 |
| nad2 | 788         | 263 | C | 1447 | [0, 26, 0, 1421] | CT | 0.98 | TCT (S) => TTT (F) | NA | 2 |
| nad2 | 800         | 267 | C | 1565 | [0, 29, 0, 1536] | CT | 0.98 | TCA (S) => TTA (L) | NA | 2 |
| nad2 | <u>809</u>  | 270 | C | 1591 | [0, 37, 0, 1554] | CT | 0.98 | TCT (S) => TTT (F) | NA | 2 |
| nad2 | <u>928</u>  | 310 | C | 1218 | [0, 33, 0, 1185] | CT | 0.97 | CAT (H) => TAT (Y) | NA | 1 |
| nad2 | <u>958</u>  | 320 | C | 1031 | [0, 19, 0, 1012] | CT | 0.98 | CGT (R) => TGT (C) | NA | 1 |
| nad2 | <u>1028</u> | 343 | C | 498  | [0, 9, 0, 489]   | CT | 0.98 | TCA (S) => TTA (L) | NA | 2 |
| nad2 | 1058        | 353 | C | 356  | [0, 17, 0, 339]  | CT | 0.95 | TCA (S) => TTA (L) | NA | 2 |
| nad2 | <u>1298</u> | 433 | C | 199  | [0, 4, 0, 195]   | CT | 0.98 | GCG (A) => GTG (V) | NA | 2 |
| nad2 | <u>1400</u> | 467 | C | 320  | [0, 7, 0, 313]   | CT | 0.98 | TCA (S) => TTA (L) | NA | 2 |

|      |             |     |   |      |                   |    |      |                    |    |   |
|------|-------------|-----|---|------|-------------------|----|------|--------------------|----|---|
| nad2 | <u>1408</u> | 470 | C | 315  | [0, 10, 0, 305]   | CT | 0.97 | CCA (P) => TTA (S) | NA | 1 |
| nad2 | 1409        | 470 | C | 315  | [0, 4, 0, 311]    | CT | 0.99 | CCA (P) => TTA (L) | NA | 2 |
| nad2 | 1416        | 472 | C | 315  | [0, 21, 0, 294]   | CT | 0.93 | CCC (P) => CCT (P) | NA | 3 |
| nad2 | 1457        | 486 | C | 68   | [0, 0, 0, 68]     | CT | 1    | TCA (S) => TTA (L) | NA | 2 |
| nad3 | 44          | 15  | C | 333  | [0, 19, 0, 314]   | CT | 0.94 | TCG (S) => TTG (L) | P  | 2 |
| nad3 | 62          | 21  | C | 290  | [0, 20, 0, 270]   | CT | 0.93 | CCA (P) => CTA (L) | P  | 2 |
| nad3 | 79          | 27  | C | 220  | [0, 49, 0, 171]   | CT | 0.78 | CCA (P) => TTA (S) | P  | 1 |
| nad3 | <u>80</u>   | 27  | C | 219  | [0, 15, 0, 204]   | CT | 0.93 | CCA (P) => TTA (L) | P  | 2 |
| nad3 | 124         | 42  | C | 154  | [0, 13, 0, 141]   | CT | 0.92 | CAC (H) => TAC (Y) | P  | 1 |
| nad3 | <u>146</u>  | 49  | C | 111  | [0, 12, 0, 99]    | CT | 0.89 | TCC (S) => TTC (F) | P  | 2 |
| nad3 | 208         | 70  | C | 22   | [0, 5, 0, 17]     | CT | 0.77 | CCT (P) => TTT (F) | P  | 1 |
| nad3 | <u>209</u>  | 70  | C | 26   | [0, 6, 0, 20]     | CT | 0.77 | CCT (P) => TTT (F) | P  | 2 |
| nad3 | <u>215</u>  | 72  | C | 25   | [0, 7, 0, 18]     | CT | 0.72 | CCG (P) => CTG (L) | P  | 2 |
| nad3 | 230         | 77  | C | 18   | [0, 5, 0, 13]     | CT | 0.72 | TCC (S) => TTC (F) | P  | 2 |
| nad3 | 247         | 83  | C | 4    | [0, 3, 0, 1]      | CT | 0.25 | CCT (P) => TCT (S) | P  | 1 |
| nad3 | <u>251</u>  | 84  | C | 4    | [0, 3, 0, 1]      | CT | 0.25 | CCC (P) => CTC (L) | P  | 2 |
| nad3 | 266         | 89  | C | 10   | [0, 3, 0, 7]      | CT | 0.7  | CCC (P) => CTC (L) | P  | 2 |
| nad3 | <u>275</u>  | 92  | C | 12   | [0, 3, 0, 9]      | CT | 0.75 | TCT (S) => TTT (F) | P  | 2 |
| nad3 | 317         | 106 | C | 10   | [0, 1, 0, 9]      | CT | 0.9  | TCT (S) => TTT (F) | P  | 2 |
| nad3 | <u>344</u>  | 115 | C | 7    | [0, 0, 0, 7]      | CT | 1    | TCG (S) => TTG (L) | P  | 2 |
| nad3 | 349         | 117 | C | 9    | [0, 0, 0, 9]      | CT | 1    | CGG (R) => TGG (W) | P  | 1 |
| nad4 | <u>65</u>   | 22  | C | 1284 | [0, 138, 0, 1146] | CT | 0.89 | ACT (T) => ATT (I) | NA | 2 |
| nad4 | 68          | 23  | C | 1305 | [0, 8, 0, 1297]   | CT | 0.99 | CCT (P) => CTT (L) | NA | 2 |
| nad4 | 75          | 25  | C | 1342 | [0, 1031, 0, 311] | CT | 0.23 | TTC (F) => TTT (F) | NA | 3 |
| nad4 | <u>98</u>   | 33  | C | 1094 | [0, 10, 0, 1084]  | CT | 0.99 | CCG (P) => CTG (L) | NA | 2 |
| nad4 | <u>149</u>  | 50  | C | 659  | [0, 4, 0, 655]    | CT | 0.99 | CCT (P) => CTT (L) | NA | 2 |

|      |            |     |   |      |                   |       |      |                    |    |   |
|------|------------|-----|---|------|-------------------|-------|------|--------------------|----|---|
| nad4 | 157        | 53  | C | 722  | [0, 2, 0, 720]    | CT    | 1    | CGG (R) => TGG (W) | NA | 1 |
| nad4 | <u>188</u> | 63  | C | 516  | [0, 37, 0, 479]   | CT    | 0.93 | TCT (S) => TTT (F) | NA | 2 |
| nad4 | 353        | 118 | C | 51   | [0, 0, 0, 51]     | CT    | 1    | ACA (T) => ATA (I) | NA | 2 |
| nad4 | <u>359</u> | 120 | C | 47   | [0, 4, 0, 43]     | CT    | 0.91 | TCT (S) => TTT (F) | NA | 2 |
| nad4 | <u>367</u> | 123 | C | 46   | [0, 1, 0, 45]     | CT    | 0.98 | CGT (R) => TGT (C) | NA | 1 |
| nad4 | <u>407</u> | 136 | C | 16   | [0, 1, 0, 15]     | CT    | 0.94 | CCT (P) => CTT (L) | NA | 2 |
| nad4 | <u>424</u> | 142 | C | 12   | [0, 1, 0, 11]     | CT    | 0.92 | CTT (L) => TTT (F) | NA | 1 |
| nad4 | 427        | 143 | C | 9    | [0, 6, 0, 3]      | CT    | 0.33 | CCC (P) => TTC (S) | NA | 1 |
| nad4 | <u>428</u> | 143 | C | 11   | [0, 8, 0, 3]      | CT    | 0.27 | CCC (P) => TTC (F) | NA | 2 |
| nad4 | 440        | 147 | C | 12   | [0, 0, 0, 12]     | CT    | 1    | CCA (P) => CTA (L) | NA | 2 |
| nad4 | 599        | 200 | C | 2433 | [1, 4, 0, 2428]   | CT CA | 1    | TCA (S) => TTA (L) | NA | 2 |
| nad4 | 637        | 213 | C | 1726 | [0, 1435, 0, 291] | CT    | 0.17 | CTA (L) => TTA (L) | NA | 1 |
| nad4 | <u>650</u> | 217 | C | 1683 | [0, 10, 0, 1673]  | CT    | 0.99 | TCT (S) => TTT (F) | NA | 2 |
| nad4 | 758        | 253 | C | 385  | [0, 3, 0, 382]    | CT    | 0.99 | CCT (P) => CTT (L) | NA | 2 |
| nad4 | 810        | 270 | C | 223  | [0, 170, 0, 53]   | CT    | 0.24 | CCC (P) => CCT (P) | NA | 3 |
| nad4 | 847        | 283 | C | 118  | [0, 91, 0, 27]    | CT    | 0.23 | CCA (P) => TTA (S) | NA | 1 |
| nad4 | <u>848</u> | 283 | C | 110  | [0, 13, 0, 97]    | CT    | 0.88 | CCA (P) => TTA (L) | NA | 2 |
| nad4 | 878        | 293 | C | 79   | [0, 4, 0, 75]     | CT    | 0.95 | TCG (S) => TTG (L) | NA | 2 |
| nad4 | 997        | 333 | C | 628  | [0, 113, 0, 515]  | CT    | 0.82 | CTA (L) => TTA (L) | NA | 1 |
| nad4 | 1001       | 334 | C | 585  | [0, 47, 0, 538]   | CT    | 0.92 | CCG (P) => CTG (L) | NA | 2 |
| nad4 | 1007       | 336 | C | 632  | [0, 50, 0, 582]   | CT    | 0.92 | TCA (S) => TTA (L) | NA | 2 |
| nad4 | 1100       | 367 | C | 1068 | [0, 19, 0, 1049]  | CT    | 0.98 | TCA (S) => TTA (L) | NA | 2 |
| nad4 | 1120       | 374 | C | 821  | [0, 39, 0, 782]   | CT    | 0.95 | CTC (L) => TTC (F) | NA | 1 |
| nad4 | 1123       | 375 | C | 842  | [0, 46, 0, 796]   | CT    | 0.95 | CCT (P) => TCT (S) | NA | 1 |
| nad4 | 1142       | 381 | C | 759  | [0, 39, 0, 720]   | CT    | 0.95 | TCC (S) => TTC (F) | NA | 2 |
| nad4 | 1163       | 388 | C | 689  | [0, 7, 0, 682]    | CT    | 0.99 | TCA (S) => TTA (L) | NA | 2 |



|       |             |     |   |      |                  |    |      |                    |    |   |
|-------|-------------|-----|---|------|------------------|----|------|--------------------|----|---|
| nad4  | <u>1298</u> | 433 | C | 103  | [0, 7, 0, 96]    | CT | 0.93 | GCG (A) => GTG (V) | NA | 2 |
| nad4  | 1346        | 449 | C | 8    | [0, 0, 0, 8]     | CT | 1    | CCA (P) => CTA (L) | NA | 2 |
| nad4  | 1364        | 455 | C | 3    | [0, 0, 0, 3]     | CT | 1    | TCC (S) => TTC (F) | NA | 2 |
| nad4  | <u>1408</u> | 470 | C | 9    | [0, 1, 0, 8]     | CT | 0.89 | CAC (H) => TAC (Y) | NA | 1 |
| nad4  | 1424        | 475 | C | 7    | [0, 3, 0, 4]     | CT | 0.57 | CCG (P) => CTG (L) | NA | 2 |
| nad4L | 11          | 4   | C | 269  | [0, 13, 0, 256]  | CT | 0.95 | TCT (S) => TTT (F) | P  | 2 |
| nad4L | 17          | 6   | C | 286  | [0, 29, 0, 257]  | CT | 0.9  | TCA (S) => TTA (L) | P  | 2 |
| nad4L | 25          | 9   | C | 283  | [0, 16, 0, 267]  | CT | 0.94 | CGG (R) => TGG (W) | P  | 1 |
| nad4L | <u>56</u>   | 19  | C | 59   | [0, 11, 0, 48]   | CT | 0.81 | CCT (P) => CTT (L) | P  | 2 |
| nad4L | <u>65</u>   | 22  | C | 27   | [0, 22, 0, 5]    | CT | 0.19 | TCA (S) => TTA (L) | P  | 2 |
| nad4L | 70          | 24  | C | 30   | [0, 23, 0, 7]    | CT | 0.23 | CCA (P) => TCA (S) | P  | 1 |
| nad4L | <u>80</u>   | 27  | C | 37   | [0, 16, 0, 21]   | CT | 0.57 | TCA (S) => TTA (L) | P  | 2 |
| nad4L | <u>101</u>  | 34  | C | 240  | [0, 15, 0, 225]  | CT | 0.94 | TCG (S) => TTG (L) | P  | 2 |
| nad4L | <u>128</u>  | 43  | C | 377  | [0, 13, 0, 364]  | CT | 0.97 | TCG (S) => TTG (L) | P  | 2 |
| nad4L | <u>149</u>  | 50  | C | 476  | [0, 8, 0, 468]   | CT | 0.98 | TCA (S) => TTA (L) | P  | 2 |
| nad4L | 158         | 53  | C | 539  | [0, 23, 0, 516]  | CT | 0.96 | TCA (S) => TTA (L) | P  | 2 |
| nad4L | <u>167</u>  | 56  | C | 567  | [0, 25, 0, 542]  | CT | 0.96 | TCA (S) => TTA (L) | P  | 2 |
| nad4L | 222         | 74  | C | 641  | [0, 567, 0, 74]  | CT | 0.12 | TTC (F) => TTT (F) | P  | 3 |
| nad4L | <u>251</u>  | 84  | C | 377  | [0, 5, 0, 372]   | CT | 0.99 | TCT (S) => TTT (F) | P  | 2 |
| nad5  | <u>155</u>  | 52  | C | 48   | [0, 11, 0, 37]   | CT | 0.77 | CCG (P) => CTG (L) | NA | 2 |
| nad5  | <u>242</u>  | 81  | C | 239  | [0, 21, 0, 218]  | CT | 0.91 | CCG (P) => CTG (L) | NA | 2 |
| nad5  | <u>359</u>  | 120 | C | 440  | [0, 12, 0, 428]  | CT | 0.97 | TCT (S) => TTT (F) | NA | 2 |
| nad5  | 374         | 125 | C | 896  | [0, 26, 0, 870]  | CT | 0.97 | CCA (P) => CTA (L) | NA | 2 |
| nad5  | <u>398</u>  | 133 | C | 942  | [0, 17, 0, 925]  | CT | 0.98 | TCT (S) => TTT (F) | NA | 2 |
| nad5  | 539         | 180 | C | 1232 | [0, 35, 0, 1197] | CT | 0.97 | CCT (P) => CTT (L) | NA | 2 |
| nad5  | <u>548</u>  | 183 | C | 1280 | [0, 33, 0, 1247] | CT | 0.97 | TCG (S) => TTG (L) | NA | 2 |

|      |            |     |   |      |                   |       |      |                    |    |   |
|------|------------|-----|---|------|-------------------|-------|------|--------------------|----|---|
| nad5 | <u>608</u> | 203 | C | 1179 | [0, 32, 0, 1147]  | CT    | 0.97 | GCC (A) => GTC (V) | NA | 2 |
| nad5 | 609        | 203 | C | 1139 | [0, 906, 0, 233]  | CT    | 0.2  | GCC (A) => GTT (V) | NA | 2 |
| nad5 | 629        | 210 | C | 1189 | [0, 27, 0, 1162]  | CT    | 0.98 | TCT (S) => TTT (F) | NA | 2 |
| nad5 | 676        | 226 | C | 1044 | [0, 19, 0, 1025]  | CT    | 0.98 | CTT (L) => TTT (F) | NA | 1 |
| nad5 | <u>713</u> | 238 | C | 1203 | [0, 16, 0, 1187]  | CT    | 0.99 | TCG (S) => TTG (L) | NA | 2 |
| nad5 | <u>725</u> | 242 | C | 1279 | [0, 16, 0, 1263]  | CT    | 0.99 | TCA (S) => TTA (L) | NA | 2 |
| nad5 | 835        | 279 | C | 1166 | [0, 41, 0, 1125]  | CT    | 0.96 | CCG (P) => TCG (S) | NA | 1 |
| nad5 | 1310       | 437 | C | 103  | [0, 5, 0, 98]     | CT    | 0.95 | TCA (S) => TTA (L) | NA | 2 |
| nad5 | 1490       | 497 | C | 758  | [0, 68, 0, 690]   | CT    | 0.91 | CCC (P) => CTC (L) | NA | 2 |
| nad5 | 1550       | 517 | C | 1199 | [0, 95, 0, 1104]  | CT    | 0.92 | ACC (T) => ATC (I) | NA | 2 |
| nad5 | 1568       | 523 | C | 1197 | [0, 80, 0, 1117]  | CT    | 0.93 | CCG (P) => CTG (L) | NA | 2 |
| nad5 | 1580       | 527 | C | 1191 | [0, 84, 0, 1107]  | CT    | 0.93 | TCA (S) => TTA (L) | NA | 2 |
| nad5 | 1589       | 530 | C | 1103 | [0, 110, 0, 993]  | CT    | 0.9  | TCT (S) => TTT (F) | NA | 2 |
| nad5 | 1610       | 537 | C | 1351 | [0, 223, 0, 1128] | CT    | 0.83 | TCC (S) => TTC (F) | NA | 2 |
| nad5 | 1695       | 565 | C | 684  | [0, 586, 0, 98]   | CT    | 0.14 | TTC (F) => TTT (F) | NA | 3 |
| nad5 | 1895       | 632 | C | 78   | [0, 14, 0, 64]    | CT    | 0.82 | TCA (S) => TTA (L) | NA | 2 |
| nad5 | 1916       | 639 | C | 54   | [0, 12, 0, 42]    | CT    | 0.78 | TCT (S) => TTT (F) | NA | 2 |
| nad5 | 1918       | 640 | C | 56   | [0, 14, 0, 42]    | CT    | 0.75 | CGT (R) => TGT (C) | NA | 1 |
| nad5 | 1958       | 653 | C | 33   | [0, 4, 0, 29]     | CT    | 0.88 | TCG (S) => TTG (L) | NA | 2 |
| nad5 | 1981       | 661 | C | 30   | [0, 3, 0, 27]     | CT    | 0.9  | CGT (R) => TGT (C) | NA | 1 |
| nad6 | <u>26</u>  | 9   | C | 2037 | [0, 114, 1, 1922] | CT CG | 0.94 | CCT (P) => CTT (L) | NA | 2 |
| nad6 | 88         | 30  | C | 1440 | [0, 25, 0, 1415]  | CT    | 0.98 | CCC (P) => TTC (F) | NA | 1 |
| nad6 | <u>89</u>  | 30  | C | 1457 | [0, 31, 0, 1426]  | CT    | 0.98 | CCC (P) => TTC (F) | NA | 2 |
| nad6 | 95         | 32  | C | 1467 | [0, 95, 0, 1372]  | CT    | 0.94 | CCA (P) => CTA (L) | NA | 2 |
| nad6 | <u>103</u> | 35  | C | 1668 | [0, 32, 0, 1636]  | CT    | 0.98 | CGC (R) => TGC (C) | NA | 1 |
| nad6 | <u>161</u> | 54  | C | 2957 | [0, 62, 0, 2895]  | CT    | 0.98 | CCA (P) => CTA (L) | NA | 2 |

|      |            |     |   |      |                    |       |      |                    |    |   |
|------|------------|-----|---|------|--------------------|-------|------|--------------------|----|---|
| nad6 | 169        | 57  | C | 3157 | [0, 48, 0, 3109]   | CT    | 0.98 | CAT (H) => TAT (Y) | NA | 1 |
| nad6 | 191        | 64  | C | 3983 | [0, 27, 0, 3956]   | CT    | 0.99 | TCA (S) => TTA (L) | NA | 2 |
| nad6 | 306        | 102 | C | 6191 | [1, 4510, 0, 1680] | CT CA | 0.27 | TTC (F) => TTT (F) | NA | 3 |
| nad6 | 463        | 155 | C | 1391 | [0, 14, 0, 1377]   | CT    | 0.99 | CCT (P) => TCT (S) | NA | 1 |
| nad6 | 569        | 190 | C | 101  | [0, 2, 0, 99]      | CT    | 0.98 | TCT (S) => TTT (F) | NA | 2 |
| nad7 | 45         | 15  | C | 147  | [0, 115, 0, 32]    | CT    | 0.22 | TTC (F) => TTT (F) | NA | 3 |
| nad7 | <u>77</u>  | 26  | C | 70   | [0, 13, 0, 57]     | CT    | 0.81 | TCA (S) => TTA (L) | NA | 2 |
| nad7 | <u>137</u> | 46  | C | 18   | [0, 5, 0, 13]      | CT    | 0.72 | TCA (S) => TTA (L) | NA | 2 |
| nad7 | 200        | 67  | C | 17   | [0, 3, 0, 14]      | CT    | 0.82 | TCT (S) => TTT (F) | NA | 2 |
| nad7 | <u>209</u> | 70  | C | 17   | [0, 9, 0, 8]       | CT    | 0.47 | TCA (S) => TTA (L) | NA | 2 |
| nad7 | 244        | 82  | C | 1731 | [0, 48, 0, 1683]   | CT    | 0.97 | CAT (H) => TAT (Y) | NA | 1 |
| nad7 | <u>251</u> | 84  | C | 1743 | [0, 59, 0, 1684]   | CT    | 0.97 | TCA (S) => TTA (L) | NA | 2 |
| nad7 | <u>316</u> | 106 | C | 3061 | [0, 28, 0, 3033]   | CT    | 0.99 | CGT (R) => TGT (C) | NA | 1 |
| nad7 | 335        | 112 | C | 3450 | [0, 21, 0, 3429]   | CT    | 0.99 | TCA (S) => TTA (L) | NA | 2 |
| nad7 | <u>344</u> | 115 | C | 3572 | [0, 68, 0, 3504]   | CT    | 0.98 | TCA (S) => TTA (L) | NA | 2 |
| nad7 | 383        | 128 | C | 3372 | [0, 34, 0, 3338]   | CT    | 0.99 | TCA (S) => TTA (L) | NA | 2 |
| nad7 | 531        | 177 | C | 2232 | [0, 1905, 0, 327]  | CT    | 0.15 | TCC (S) => TCT (S) | NA | 3 |
| nad7 | 534        | 178 | C | 2263 | [0, 1936, 0, 327]  | CT    | 0.14 | TTC (F) => TTT (F) | NA | 3 |
| nad7 | <u>578</u> | 193 | C | 1586 | [0, 17, 0, 1569]   | CT    | 0.99 | TCA (S) => TTA (L) | NA | 2 |
| nad7 | 724        | 242 | C | 744  | [0, 24, 0, 720]    | CT    | 0.97 | CAT (H) => TAT (Y) | NA | 1 |
| nad7 | 739        | 247 | C | 599  | [0, 26, 0, 573]    | CT    | 0.96 | CCT (P) => TTT (F) | NA | 1 |
| nad7 | <u>740</u> | 247 | C | 609  | [0, 24, 0, 585]    | CT    | 0.96 | CCT (P) => TTT (F) | NA | 2 |
| nad7 | 769        | 257 | C | 487  | [0, 17, 0, 470]    | CT    | 0.97 | CGC (R) => TGC (C) | NA | 1 |
| nad7 | 926        | 309 | C | 1810 | [0, 1545, 0, 265]  | CT    | 0.15 | TCA (S) => TTA (L) | NA | 2 |
| nad7 | 944        | 315 | C | 2402 | [0, 51, 0, 2351]   | CT    | 0.98 | CCT (P) => CTT (L) | NA | 2 |
| nad7 | 1050       | 350 | C | 1882 | [0, 44, 0, 1838]   | CT    | 0.98 | CCC (P) => CCT (P) | NA | 3 |

|      |            |     |   |      |                   |             |      |                    |    |   |
|------|------------|-----|---|------|-------------------|-------------|------|--------------------|----|---|
| nad7 | 1057       | 353 | C | 1854 | [0, 110, 0, 1744] | CT          | 0.94 | CGT (R) => TGT (C) | NA | 1 |
| nad7 | 1103       | 368 | C | 745  | [0, 5, 0, 740]    | CT          | 0.99 | TCT (S) => TTT (F) | NA | 2 |
| nad7 | 1124       | 375 | C | 558  | [0, 0, 0, 558]    | CT          | 1    | CCA (P) => CTA (L) | NA | 2 |
| nad7 | 1137       | 379 | C | 473  | [0, 362, 0, 111]  | CT          | 0.23 | GTC (V) => GTT (V) | NA | 3 |
| nad7 | 1166       | 389 | C | 149  | [0, 10, 0, 139]   | CT          | 0.93 | TCT (S) => TTT (F) | NA | 2 |
| nad9 | 15         | 5   | C | 4345 | [0, 95, 0, 4250]  | CT          | 0.98 | TTC (F) => TTT (F) | P  | 3 |
| nad9 | <u>92</u>  | 31  | C | 4365 | [0, 37, 0, 4328]  | CT          | 0.99 | TCT (S) => TTT (F) | P  | 2 |
| nad9 | 113        | 38  | C | 5111 | [0, 253, 0, 4858] | CT          | 0.95 | CCA (P) => CTA (L) | P  | 2 |
| nad9 | <u>167</u> | 56  | C | 6302 | [0, 63, 0, 6239]  | CT          | 0.99 | TCG (S) => TTG (L) | P  | 2 |
| nad9 | <u>298</u> | 100 | C | 9255 | [0, 68, 1, 9186]  | CT CG       | 0.99 | CCG (P) => TCG (S) | P  | 1 |
| nad9 | <u>328</u> | 110 | C | 7221 | [1, 52, 1, 7167]  | CT CA<br>CG | 0.99 | CGG (R) => TGG (W) | P  | 1 |
| nad9 | 368        | 123 | C | 5797 | [0, 28, 0, 5769]  | CT          | 1    | TCC (S) => TTC (F) | P  | 2 |
| nad9 | <u>398</u> | 133 | C | 3982 | [0, 14, 0, 3968]  | CT          | 1    | TCA (S) => TTA (L) | P  | 2 |
| nad9 | 439        | 147 | C | 2185 | [0, 66, 0, 2119]  | CT          | 0.97 | CTT (L) => TTT (F) | P  | 1 |
| rpl5 | 8          | 3   | C | 550  | [0, 411, 0, 139]  | CT          | 0.25 | CCA (P) => CTA (L) | N  | 2 |
| rpl5 | 35         | 12  | C | 596  | [0, 71, 0, 525]   | CT          | 0.88 | TCA (S) => TTA (L) | P  | 2 |
| rpl5 | <u>47</u>  | 16  | C | 636  | [0, 121, 0, 515]  | CT          | 0.81 | CCG (P) => CTG (L) | P  | 2 |
| rpl5 | <u>64</u>  | 22  | C | 692  | [0, 390, 0, 302]  | CT          | 0.44 | CAC (H) => TAC (Y) | N  | 1 |
| rpl5 | 160        | 54  | C | 769  | [0, 90, 0, 679]   | CT          | 0.88 | CCG (P) => TTG (L) | P  | 1 |
| rpl5 | <u>161</u> | 54  | C | 795  | [0, 658, 0, 137]  | CT          | 0.17 | CCG (P) => TTG (L) | N  | 2 |
| rpl5 | 441        | 147 | C | 549  | [0, 178, 0, 371]  | CT          | 0.68 | ATC (I) => ATT (I) | N  | 3 |
| rpl5 | 509        | 170 | C | 396  | [0, 31, 0, 365]   | CT          | 0.92 | CCA (P) => CTA (L) | P  | 2 |
| rpl5 | <u>512</u> | 171 | C | 382  | [0, 27, 0, 355]   | CT          | 0.93 | CCG (P) => CTG (L) | P  | 2 |
| rpl5 | 529        | 177 | C | 398  | [0, 29, 0, 369]   | CT          | 0.93 | CAA (O) => TAA (*) | P  | 1 |
| rpl5 | 666        | 222 | C | 195  | [0, 159, 0, 36]   | CT          | 0.18 | ATC (I) => ATT (I) | N  | 3 |

|       |            |     |   |      |                   |       |      |                    |    |   |
|-------|------------|-----|---|------|-------------------|-------|------|--------------------|----|---|
| rpl10 | <u>101</u> | 34  | C | 361  | [0, 64, 0, 297]   | CT    | 0.82 | TCA (S) => TTA (L) | NA | 2 |
| rpl10 | 134        | 45  | C | 342  | [0, 170, 0, 172]  | CT    | 0.5  | CCA (P) => CTA (L) | NA | 2 |
| rpl16 | <u>221</u> | 74  | C | 414  | [0, 1, 0, 413]    | CT    | 1    | TCG (S) => TTG (L) | P  | 2 |
| rps3  | <u>92</u>  | 31  | C | 484  | [0, 13, 0, 471]   | CT    | 0.97 | TCA (S) => TTA (L) | NA | 2 |
| rps3  | <u>512</u> | 171 | C | 1912 | [0, 89, 0, 1823]  | CT    | 0.95 | TCA (S) => TTA (L) | NA | 2 |
| rps3  | <u>713</u> | 238 | C | 1950 | [0, 60, 0, 1890]  | CT    | 0.97 | TCG (S) => TTG (L) | NA | 2 |
| rps3  | 986        | 329 | C | 1603 | [0, 1299, 0, 304] | CT    | 0.19 | TCG (S) => TTG (L) | NA | 2 |
| rps3  | 1022       | 341 | C | 1013 | [1, 9, 0, 1003]   | CT CA | 0.99 | CCA (P) => CTA (L) | NA | 2 |
| rps3  | 1355       | 452 | C | 2246 | [0, 18, 0, 2228]  | CT    | 0.99 | CCG (P) => CTG (L) | NA | 2 |
| rps3  | 1496       | 499 | C | 979  | [0, 20, 0, 959]   | CT    | 0.98 | TCA (S) => TTA (L) | NA | 2 |
| rps3  | 1582       | 528 | C | 584  | [0, 9, 0, 575]    | CT    | 0.98 | CCT (P) => TCT (S) | NA | 1 |
| rps4  | 176        | 59  | C | 882  | [0, 37, 0, 845]   | CT    | 0.96 | TCA (S) => TTA (L) | NA | 2 |
| rps4  | 205        | 69  | C | 745  | [0, 30, 0, 715]   | CT    | 0.96 | CAT (H) => TAT (Y) | NA | 1 |
| rps4  | 219        | 73  | C | 736  | [0, 148, 0, 588]  | CT    | 0.8  | CCC (P) => CCT (P) | NA | 3 |
| rps4  | <u>275</u> | 92  | C | 691  | [0, 20, 0, 671]   | CT    | 0.97 | CCA (P) => CTA (L) | NA | 2 |
| rps4  | <u>287</u> | 96  | C | 661  | [0, 13, 0, 648]   | CT    | 0.98 | TCG (S) => TTG (L) | NA | 2 |
| rps4  | <u>299</u> | 100 | C | 727  | [0, 17, 0, 710]   | CT    | 0.98 | CCG (P) => CTG (L) | NA | 2 |
| rps4  | <u>316</u> | 106 | C | 726  | [0, 102, 0, 624]  | CT    | 0.86 | CGT (R) => TGT (C) | NA | 1 |
| rps4  | <u>344</u> | 115 | C | 730  | [0, 14, 0, 716]   | CT    | 0.98 | CCG (P) => CTG (L) | NA | 2 |
| rps4  | 443        | 148 | C | 901  | [0, 770, 0, 131]  | CT    | 0.15 | GCG (A) => GTG (V) | NA | 2 |
| rps4  | 483        | 161 | C | 1072 | [0, 924, 0, 148]  | CT    | 0.14 | ATC (I) => ATT (I) | NA | 3 |
| rps4  | 491        | 164 | C | 1038 | [1, 37, 0, 1000]  | CT CA | 0.96 | TCA (S) => TTA (L) | NA | 2 |
| rps4  | 592        | 198 | C | 1889 | [0, 1421, 0, 468] | CT    | 0.25 | CGC (R) => TGC (C) | NA | 1 |
| rps4  | <u>848</u> | 283 | C | 495  | [0, 443, 0, 52]   | CT    | 0.11 | TCG (S) => TTG (L) | NA | 2 |
| rps4  | 852        | 284 | C | 484  | [0, 371, 0, 113]  | CT    | 0.23 | ACC (T) => ACT (T) | NA | 3 |
| rps4  | 941        | 314 | C | 237  | [0, 3, 0, 234]    | CT    | 0.99 | TCG (S) => TTG (L) | NA | 2 |

|       |             |     |   |      |                  |    |      |                    |    |   |
|-------|-------------|-----|---|------|------------------|----|------|--------------------|----|---|
| rps4  | 952         | 318 | C | 223  | [0, 8, 0, 215]   | CT | 0.96 | CAT (H) => TAT (Y) | NA | 1 |
| rps4  | 962         | 321 | C | 182  | [0, 15, 0, 167]  | CT | 0.92 | CCA (P) => CTA (L) | NA | 2 |
| rps4  | 977         | 326 | C | 165  | [0, 8, 0, 157]   | CT | 0.95 | TCT (S) => TTT (F) | NA | 2 |
| rps4  | <u>1028</u> | 343 | C | 60   | [0, 1, 0, 59]    | CT | 0.98 | CCA (P) => CTA (L) | NA | 2 |
| rps4  | 1042        | 348 | C | 46   | [0, 2, 0, 44]    | CT | 0.96 | CGG (R) => TGG (W) | NA | 1 |
| rps10 | 102         | 34  | C | 186  | [0, 13, 0, 173]  | CT | 0.93 | GTC (V) => GTT (V) | NA | 3 |
| rps10 | 132         | 44  | C | 120  | [0, 107, 0, 13]  | CT | 0.11 | TCC (S) => TCT (S) | NA | 3 |
| rps10 | 210         | 70  | C | 44   | [0, 32, 0, 12]   | CT | 0.27 | TTC (F) => TTT (F) | NA | 3 |
| rps10 | 214         | 72  | C | 38   | [0, 0, 0, 38]    | CT | 1    | CGG (R) => TGG (W) | NA | 1 |
| rps10 | 278         | 93  | C | 19   | [0, 0, 0, 19]    | CT | 1    | TCG (S) => TTG (L) | NA | 2 |
| rps10 | <u>307</u>  | 103 | C | 9    | [0, 0, 0, 9]     | CT | 1    | CGA (O) => TGA (*) | NA | 1 |
| rps12 | 104         | 35  | C | 1162 | [0, 20, 0, 1142] | CT | 0.98 | CCG (P) => CTG (L) | NA | 2 |
| rps12 | 159         | 53  | C | 571  | [0, 474, 0, 97]  | CT | 0.17 | GCC (A) => GCT (A) | NA | 3 |
| rps12 | 196         | 66  | C | 366  | [0, 4, 0, 362]   | CT | 0.99 | CAC (H) => TAC (Y) | NA | 1 |
| rps12 | <u>221</u>  | 74  | C | 239  | [0, 10, 0, 229]  | CT | 0.96 | TCG (S) => TTG (L) | NA | 2 |
| rps12 | 284         | 95  | C | 73   | [0, 1, 0, 72]    | CT | 0.99 | TCC (S) => TTC (F) | NA | 2 |
| rps13 | <u>56</u>   | 19  | C | 1136 | [0, 41, 0, 1095] | CT | 0.96 | TCA (S) => TTA (L) | P  | 2 |
| rps13 | <u>100</u>  | 34  | C | 901  | [0, 34, 0, 867]  | CT | 0.96 | CGT (R) => TGT (C) | P  | 1 |
| rps13 | <u>287</u>  | 96  | C | 140  | [0, 1, 0, 139]   | CT | 0.99 | TCG (S) => TTG (L) | P  | 2 |

Table S9 Summary of single nucleotide polymorphisms (SNPs) detected in the PCGs of *S. officinalis* mitogenome. “Nt Pos” means the nucleotide position of a SNP in a PCG.

| Gene  | Nt Pos | Nt reference | Nt coverage | Nt Base Count [A,C,G,T] | Nt allsubs | Nt Frequency |
|-------|--------|--------------|-------------|-------------------------|------------|--------------|
| ccmFn | 1417   | G            | 152         | [15, 0, 137, 0]         | GA         | 0.1          |
| ccmFn | 1448   | C            | 161         | [0, 131, 0, 30]         | CT         | 0.19         |
| ccmFn | 1449   | C            | 157         | [10, 126, 21, 0]        | CG CA      | 0.14         |
| ccmFn | 1457   | A            | 154         | [135, 0, 19, 0]         | AG         | 0.12         |
| ccmFn | 1471   | C            | 156         | [0, 136, 0, 20]         | CT         | 0.13         |
| ccmFn | 1486   | G            | 157         | [29, 0, 128, 0]         | GA         | 0.18         |
| ccmFn | 1496   | C            | 153         | [0, 137, 0, 16]         | CT         | 0.1          |
| ccmFn | 1818   | G            | 113         | [21, 0, 92, 0]          | GA         | 0.19         |
| ccmc  | 45     | C            | 122         | [0, 110, 0, 12]         | CT         | 0.1          |
| ccmc  | 179    | C            | 165         | [19, 146, 0, 0]         | CA         | 0.12         |
| ccmc  | 190    | A            | 167         | [151, 0, 16, 0]         | AG         | 0.1          |
| rpl5  | 413    | C            | 279         | [0, 251, 0, 28]         | CT         | 0.1          |
| atp9  | 35     | C            | 132         | [13, 119, 0, 0]         | CA         | 0.1          |
| atp9  | 125    | C            | 145         | [0, 128, 0, 17]         | CT         | 0.12         |
| cox2  | 149    | C            | 56          | [0, 49, 0, 7]           | CT         | 0.12         |
| cox2  | 153    | C            | 49          | [0, 43, 0, 6]           | CT         | 0.12         |
| atp1  | 906    | C            | 739         | [0, 188, 0, 551]        | CT         | 0.75         |
| atp1  | 912    | A            | 712         | [191, 0, 521, 0]        | AG         | 0.73         |
| atp1  | 918    | C            | 719         | [533, 186, 0, 0]        | CA         | 0.74         |
| atp1  | 921    | T            | 715         | [0, 537, 0, 178]        | TC         | 0.75         |
| atp1  | 924    | C            | 614         | [0, 186, 0, 428]        | CT         | 0.7          |
| atp1  | 936    | G            | 666         | [0, 480, 186, 0]        | GC         | 0.72         |
| atp1  | 1002   | A            | 186         | [158, 0, 28, 0]         | AG         | 0.15         |
| atp1  | 1023   | T            | 1096        | [0, 919, 0, 177]        | TC         | 0.84         |
| atp1  | 1590   | C            | 99          | [0, 88, 11, 0]          | CG         | 0.11         |
| atp1  | 1604   | T            | 435         | [0, 83, 0, 352]         | TC         | 0.19         |
| rps3  | 21     | A            | 118         | [94, 0, 24, 0]          | AG         | 0.2          |
| rps3  | 27     | G            | 121         | [22, 0, 99, 0]          | GA         | 0.18         |
| rpl16 | 15     | C            | 149         | [0, 133, 0, 16]         | CT         | 0.11         |
| nad3  | 12     | T            | 184         | [0, 43, 0, 141]         | TC         | 0.23         |
| nad3  | 29     | A            | 137         | [123, 14, 0, 0]         | AC         | 0.1          |
| nad3  | 30     | T            | 142         | [14, 0, 0, 128]         | TA         | 0.1          |
| nad3  | 45     | G            | 144         | [0, 14, 130, 0]         | GC         | 0.1          |
| nad3  | 48     | A            | 137         | [123, 0, 14, 0]         | AG         | 0.1          |
| nad3  | 51     | T            | 139         | [0, 0, 14, 125]         | TG         | 0.1          |
| nad3  | 60     | T            | 172         | [0, 40, 0, 132]         | TC         | 0.23         |
| nad3  | 62     | C            | 170         | [0, 131, 0, 39]         | CT         | 0.23         |
| nad3  | 99     | G            | 183         | [46, 0, 137, 0]         | GA         | 0.25         |
| matR  | 1496   | G            | 164         | [16, 0, 148, 0]         | GA         | 0.1          |
| matR  | 1526   | T            | 129         | [0, 17, 0, 112]         | TC         | 0.13         |
| ccmFc | 583    | A            | 217         | [184, 33, 0, 0]         | AC         | 0.15         |
| ccmFc | 620    | C            | 218         | [0, 192, 26, 0]         | CG         | 0.12         |
| ccmFc | 405    | G            | 163         | [19, 0, 144, 0]         | GA         | 0.12         |

Table S10 PCR primers used to validate the RNA editing sites from eleven PCGs in the *S. officinalis* mitogenome.

| Primer Name | PCG name | Primer Sequence           |
|-------------|----------|---------------------------|
| so-atp4-F1  | atp4     | CCACTTCCCGTTCAGTTGCT      |
| so-atp4-R1  | atp4     | TGGATCCGCTCTTCTGTGAAC     |
| so-atp8-F1  | atp8     | ACACAATTCTTCTGGTCATGCCT   |
| so-atp8-R1  | atp8     | GCTCTTCCGAACGACCAAGT      |
| so-cox1-F1  | cox1     | GGGGAGCGGAACCTTTTAC       |
| so-cox1-R1  | cox1     | ACAGTCCCAGCATATAGCGCA     |
| so-cox1-F2  | cox1     | AGTAGAAGAGAGAAGCACCCCTG   |
| so-cox1-R2  | cox1     | AGTAGCAATCGGCGACCTTT      |
| so-cox3-F1  | cox3     | ACAACCGAGGCAAAGTGGTT      |
| so-cox3-R1  | cox3     | GGAGTTCTCTTTGTCTTCGAGC    |
| so-mttB-F1  | mttB     | TAAAGATGCGCCGGTCGTAG      |
| so-mttB-R1  | mttB     | TGTTGGTTGAGAATTGCTCTGG    |
| so-nad3-F1  | nad3     | TTTCCGGTATGTAGCTCCGC      |
| so-nad3-R1  | nad3     | GCATCGCTCTTTCCTTTGTCC     |
| so-nad4L-F1 | nad4L    | ATTCTACGTTCCCGACACGG      |
| so-nad4L-R1 | nad4L    | AAGAAAACGAAAGGAGAAATTCGT  |
| so-nad9-F1  | nad9     | CTTCATTTTTAGAGGAAGAAGCGGA |
| so-nad9-R1  | nad9     | TTCTATTGATTTGTCTCCTGGACT  |
| so-rpl5-F1  | rpl5     | CTTTTTGAAGGCGATAGTTCACAGT |
| so-rpl5-R1  | rpl5     | TGGATCAATAGAAAAGGGGCTCT   |
| so-rpl16-F1 | rpl16    | CTTTCATATCGAGCCATTGAAGCA  |
| so-rpl16-R1 | rpl16    | TTTTGAATCCCGGTCCGGTT      |
| so-rps13-F1 | rps13    | ACAGCCCATTCTGATTCCAGC     |
| so-rps13-R1 | rps13    | TCTTCAGCAGGTAGGCTGCAC     |



Figure S1 The alignment of the Nanopore reads to the four conformations of the three double bifurcating structures (DBS), named DBS01-DBS03, found in the unitig graph. The unitig graph was generated using Unicycler from Illumina reads that were filtered with GetOrganelle for mitochondrial reads. The major conformations (Mac) refer to the conformations in the DBS structure supported by more long reads. The minor conformations (Mic) refer to the conformations in the DBS structure supported by less long reads. It should be emphasized that the repetitive sequences affiliated with DBS01, DBS02, and DBS03 are identical to the high-scoring pairs (HSPs): r01, r02, and r47, respectively. Each figure can be divided into three parts from top to bottom. The top part shows the reference sequences with their coordinates. The middle part shows the read coverage bar chart in blue. The name and length of the repeat and the name of the conformation are shown above the coverage plot. The bottom part shows the reads' alignment to the reference sequences. The repeat region is shown as a double-headed arrow. The boundaries of the repeat regions of the DBS structure are indicated with red vertical lines.

a Mapping of long reads to the major conformation Mac1 of the DBS01/r01.

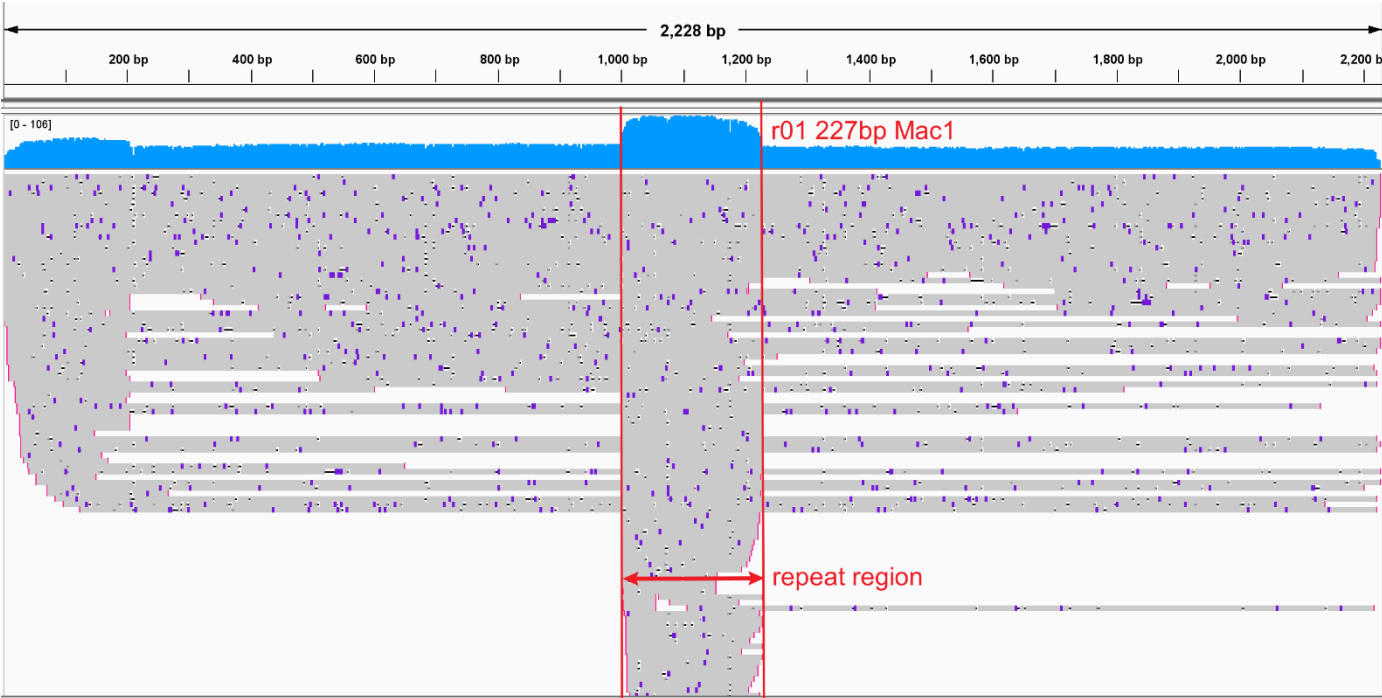

b Mapping of long reads to the major conformation Mac2 of the DBS01/r01.

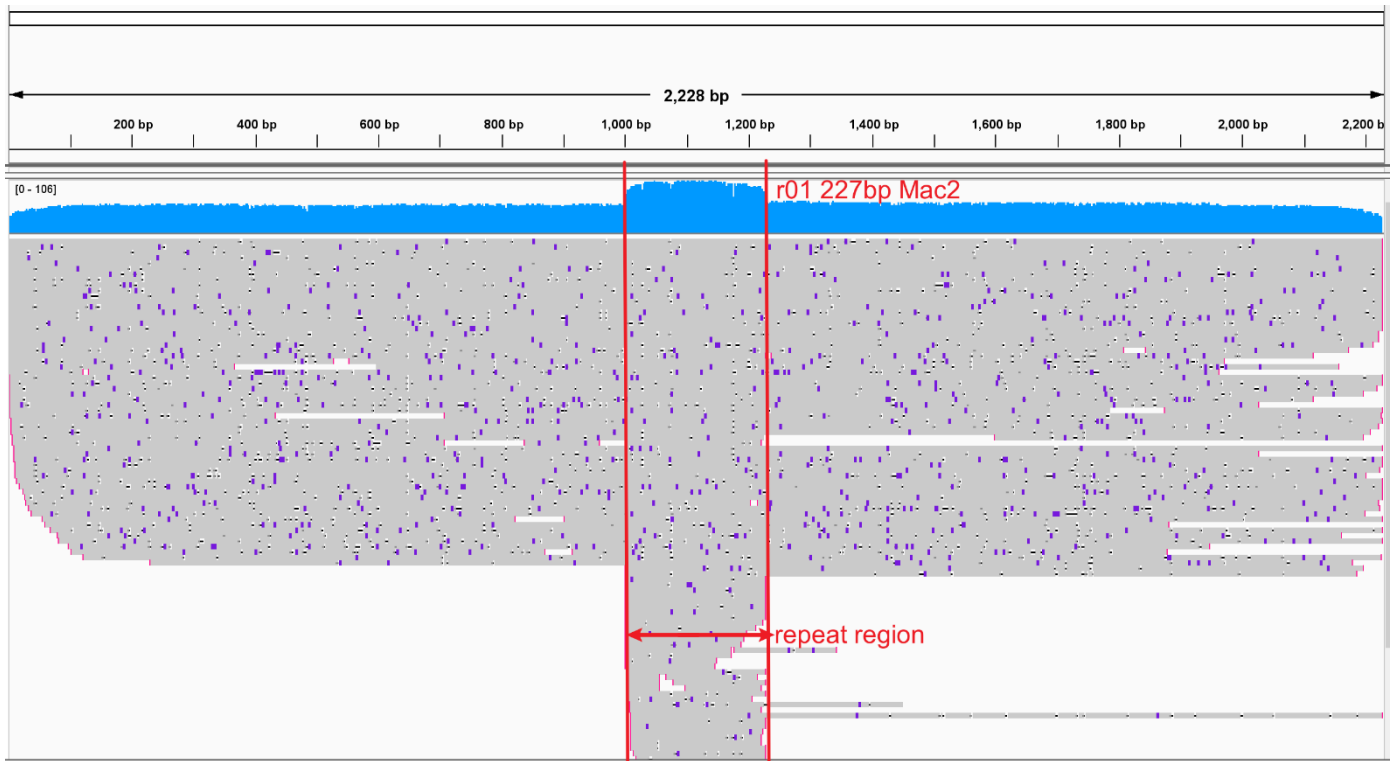

c Mapping of long reads to the minor conformation Mic1 of the DBS01/r01.

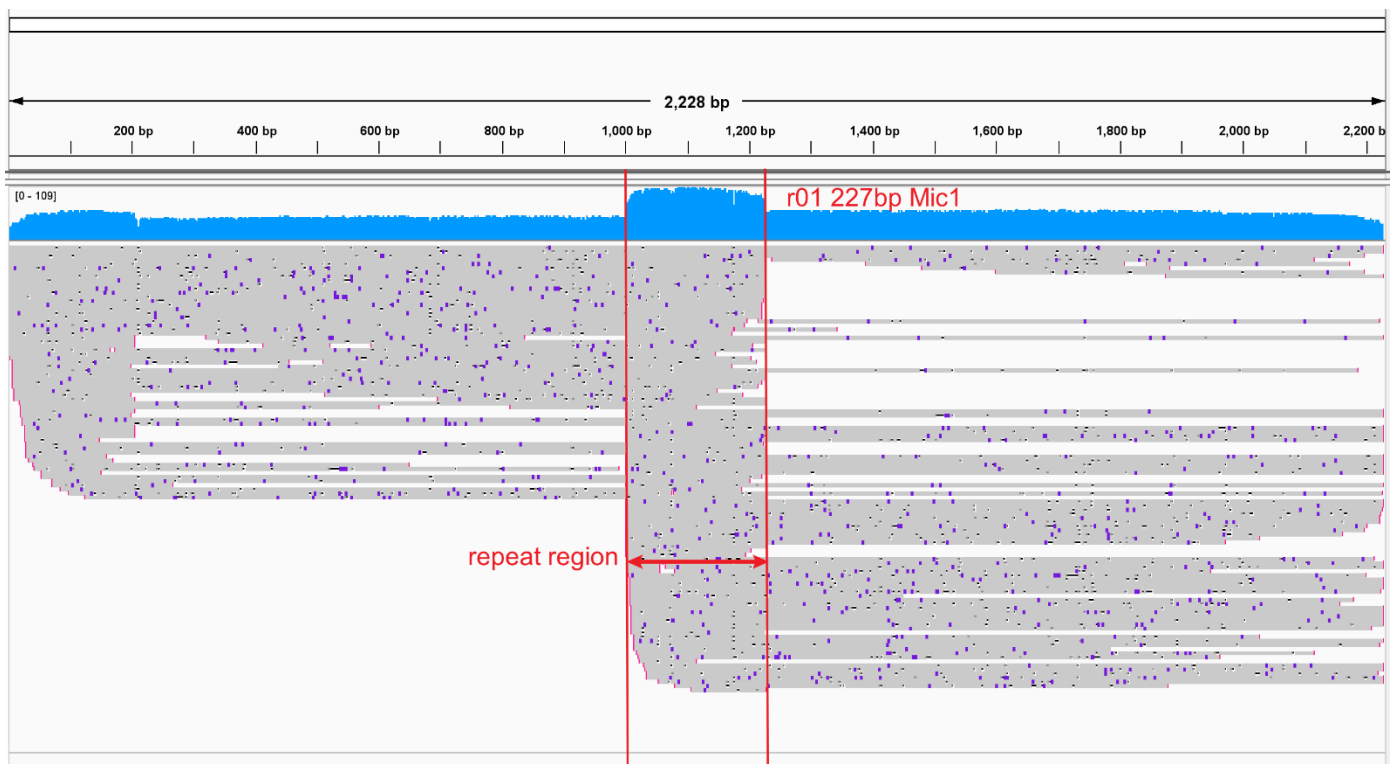

d Mapping of long reads to the minor conformation Mic2 of the DBS01/r01.

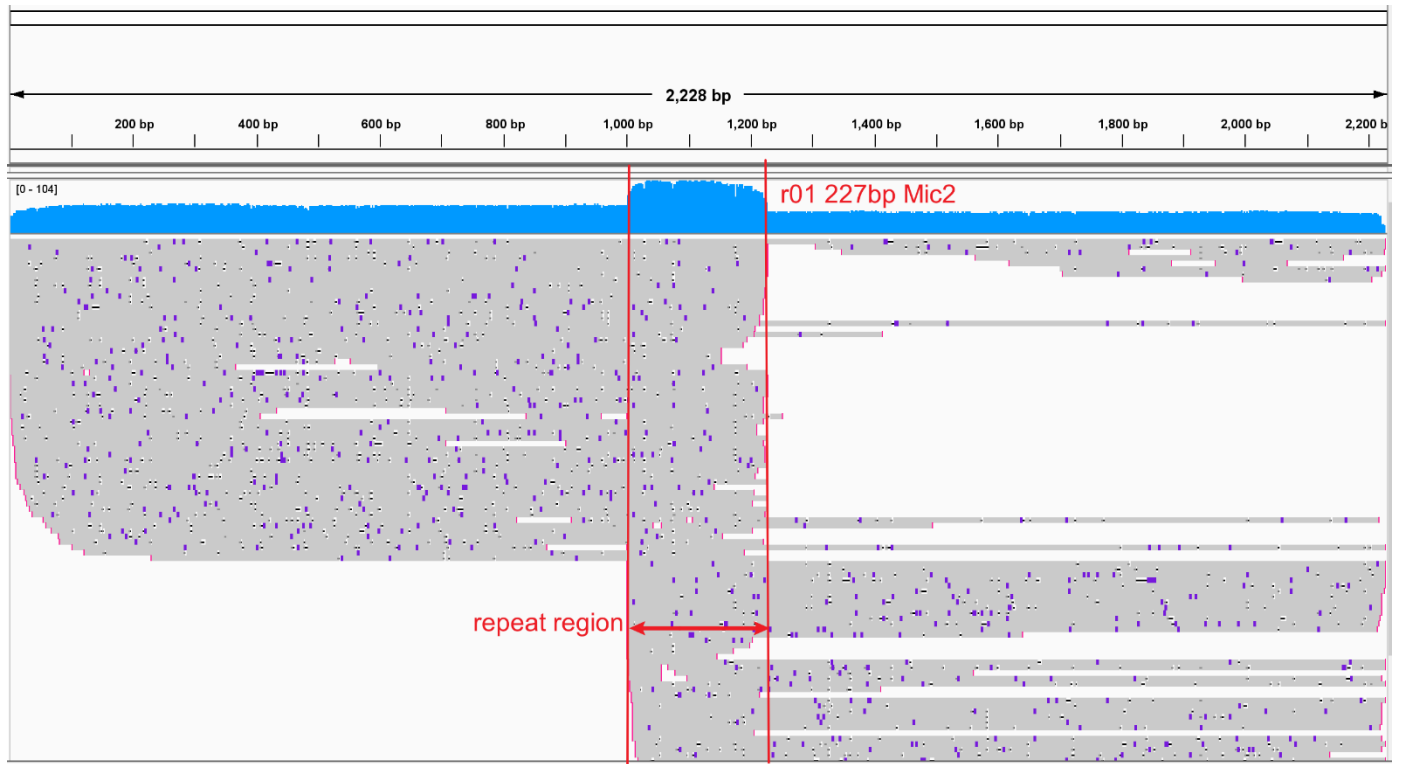

e Mapping of long reads to the major conformation Mac1 of the DBS02/r02.

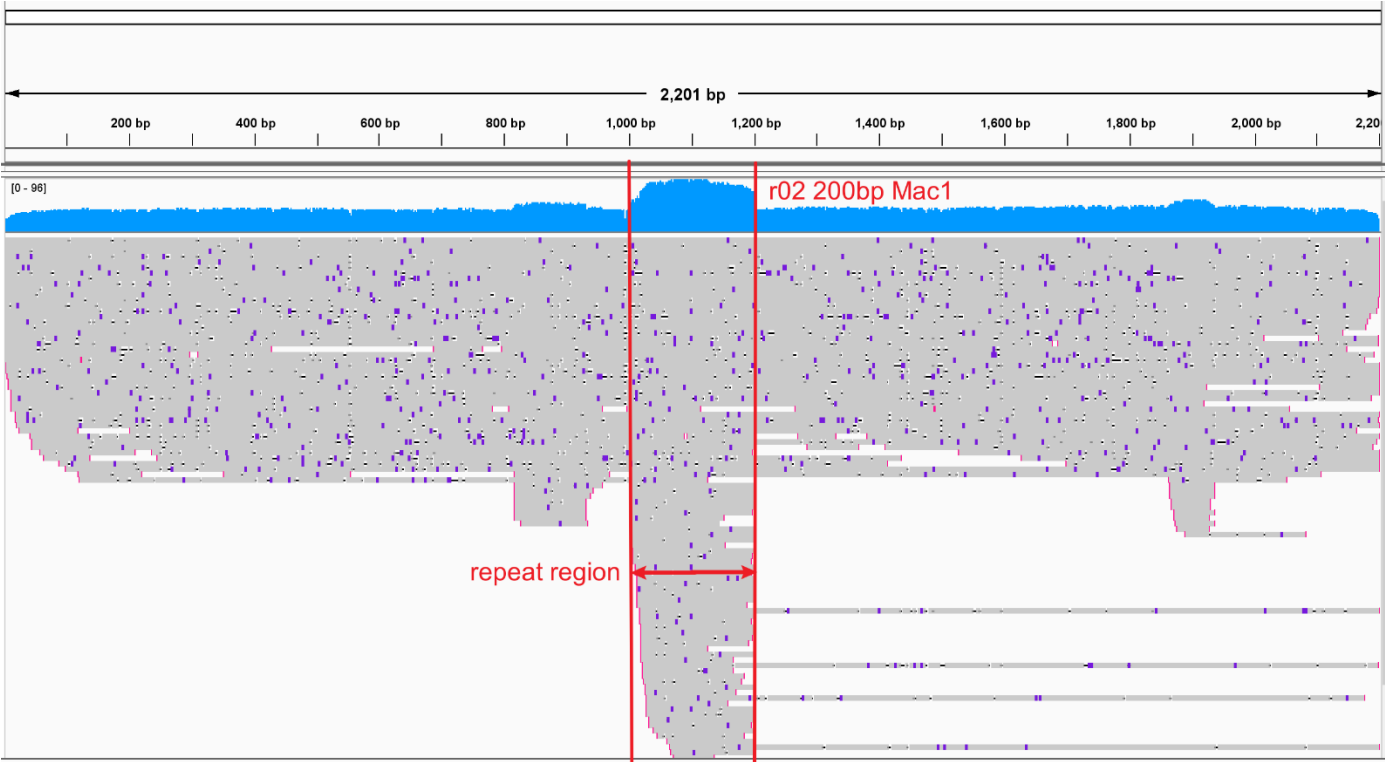

f Mapping of long reads to the major conformation Mac2 of the DBS02/r02.

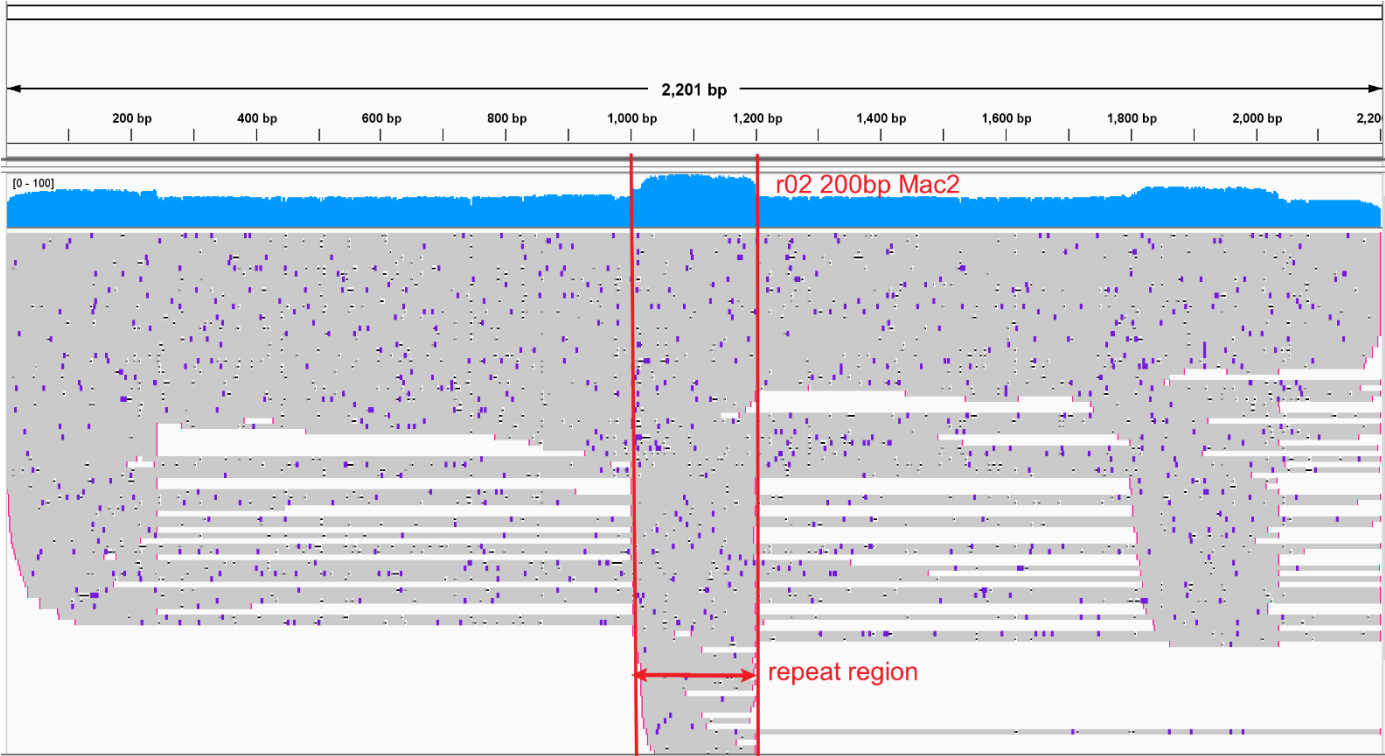

g Mapping of long reads to the minor conformation Mic1 of the DBS02/r02.

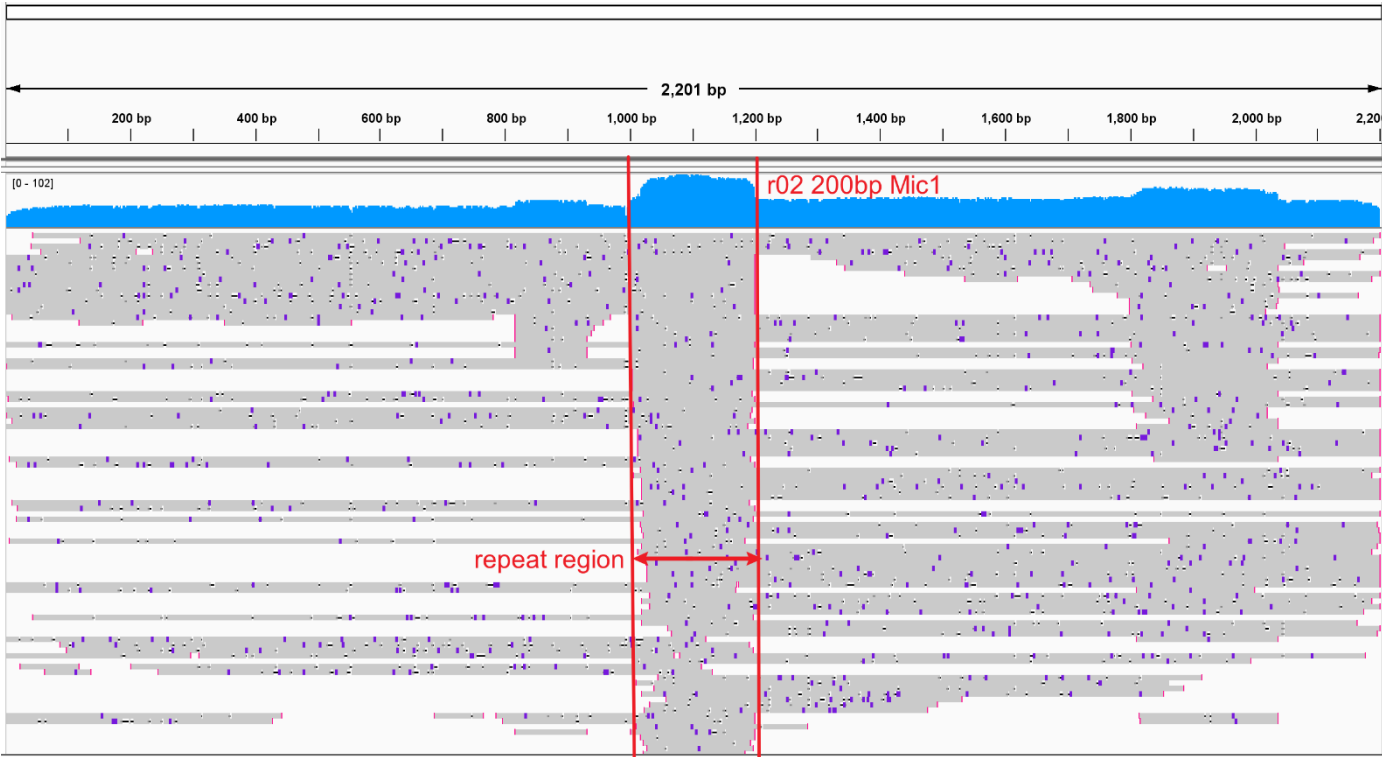

h Mapping of long reads to the minor conformation Mic1 of the DBS02/r02.

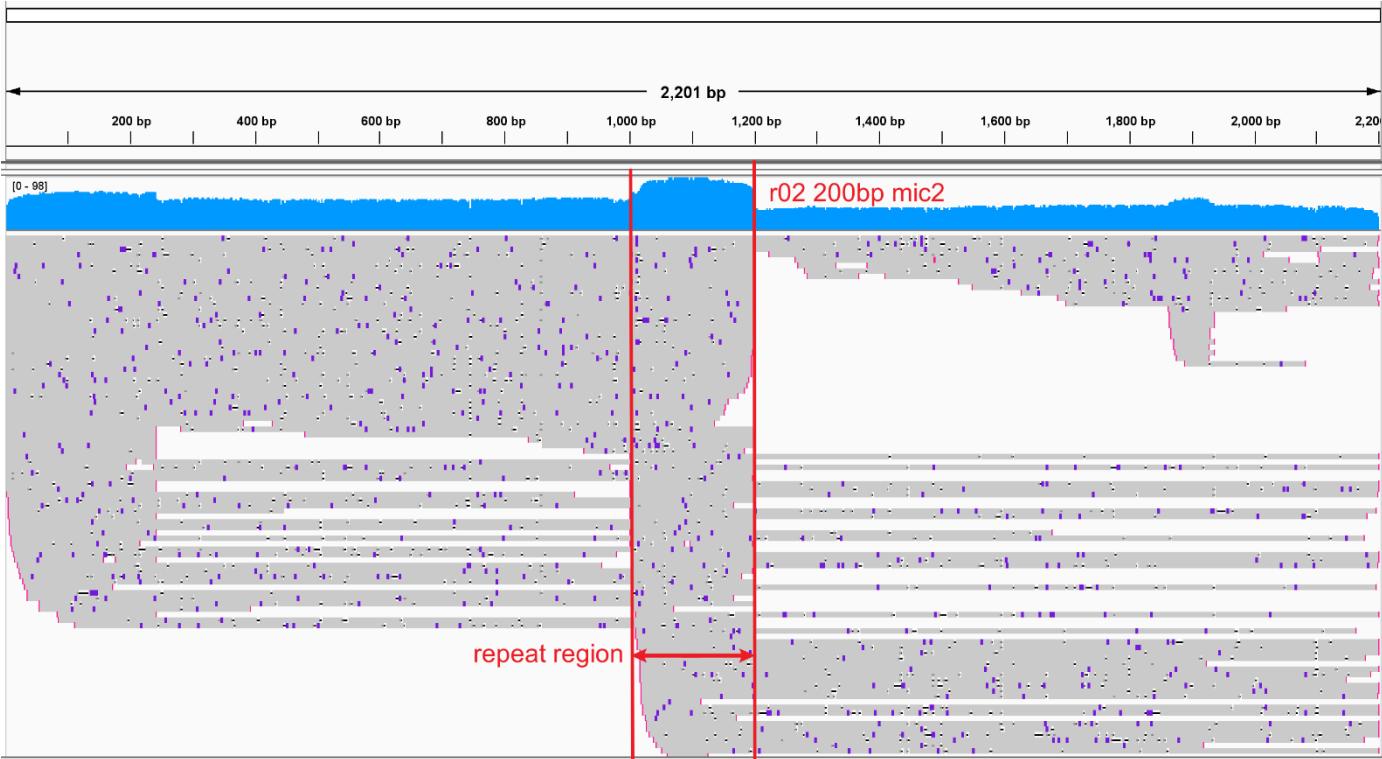

i Mapping of long reads to the major conformation Mac1 of the DBS03/r47.

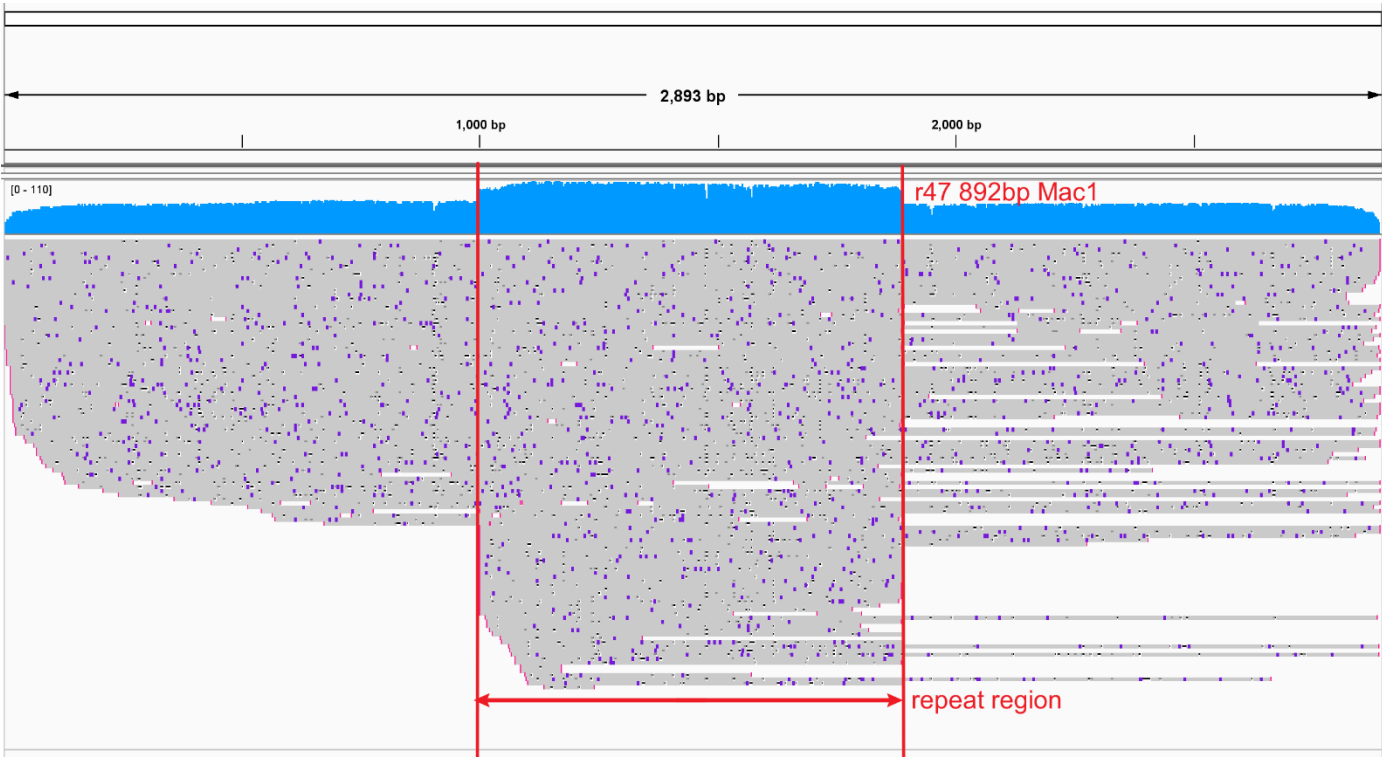

j Mapping of long reads to the major conformation Mac2 of the DBS03/r47.

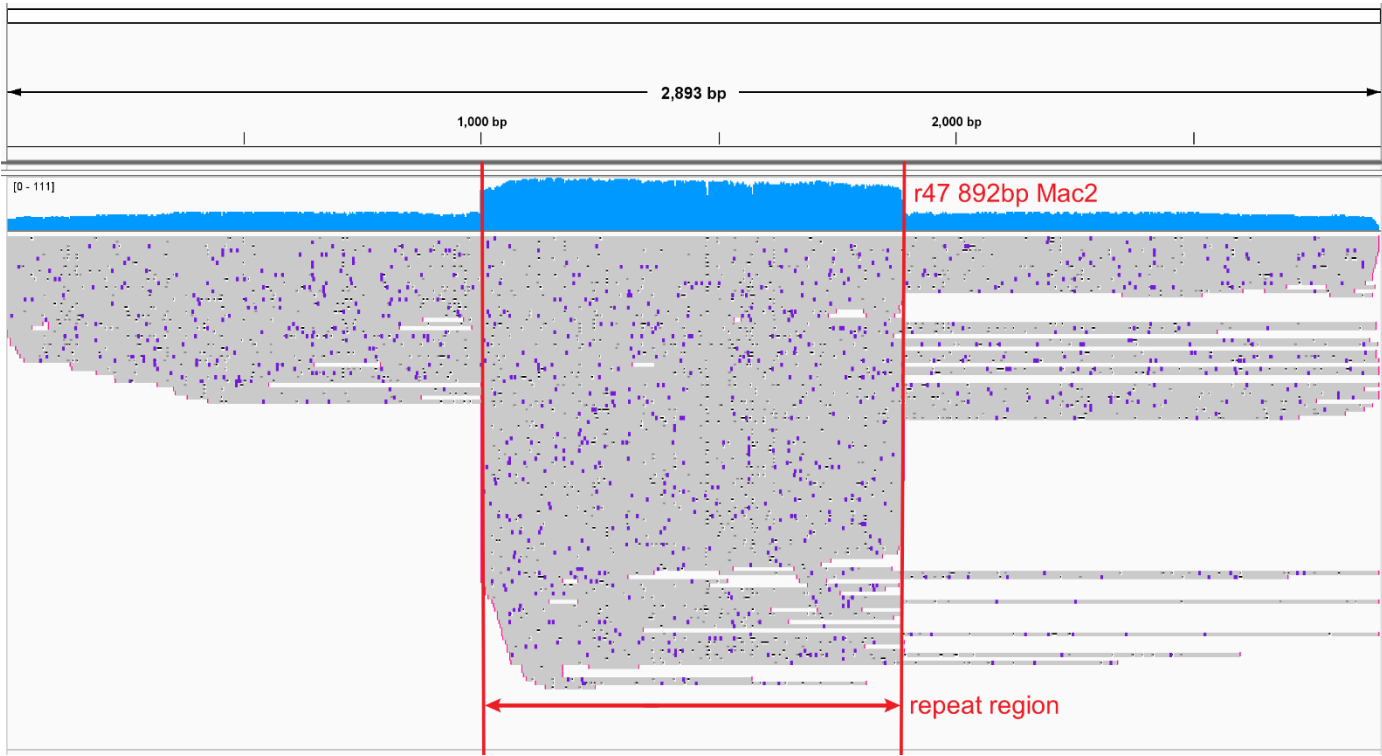

k Mapping of long reads to the minor conformation Mic1 of the DBS03//r47.

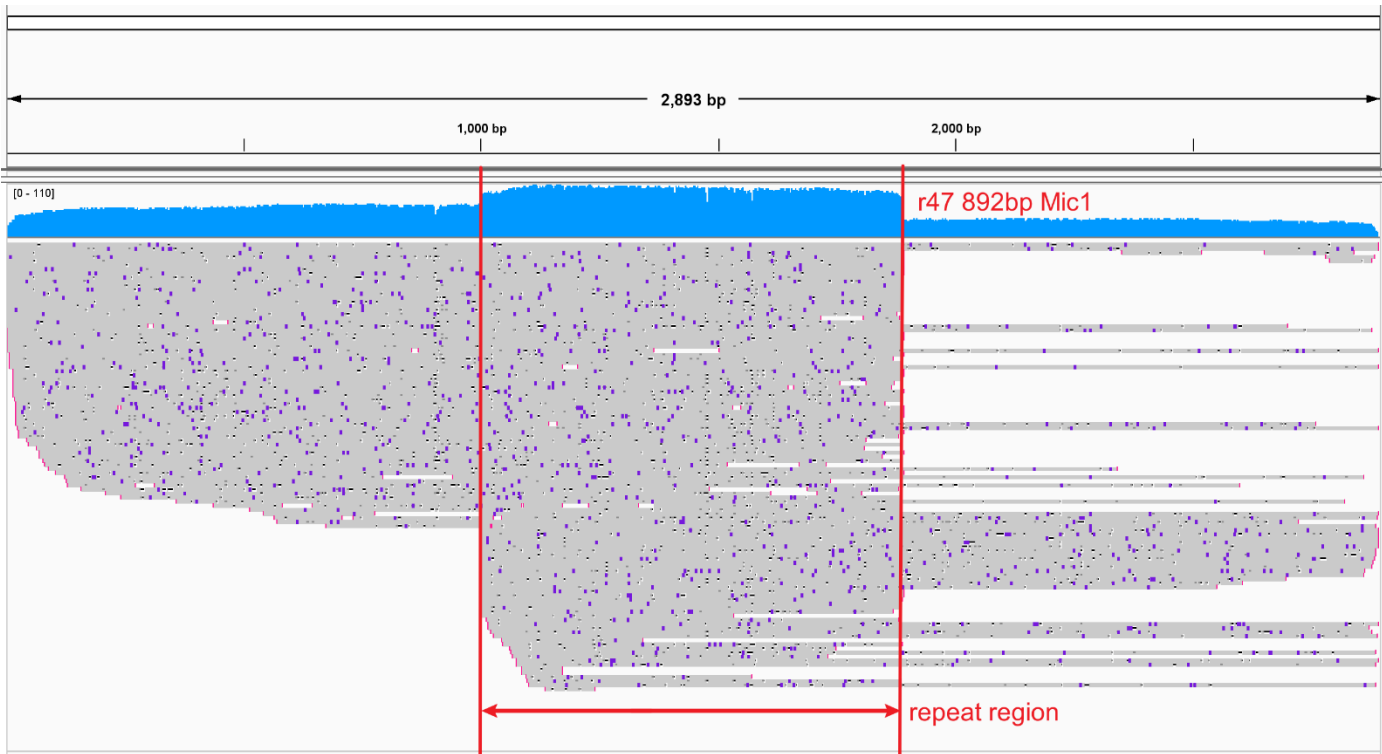

l Mapping of long reads to the minor conformation Mic1 of the DBS03/r47.

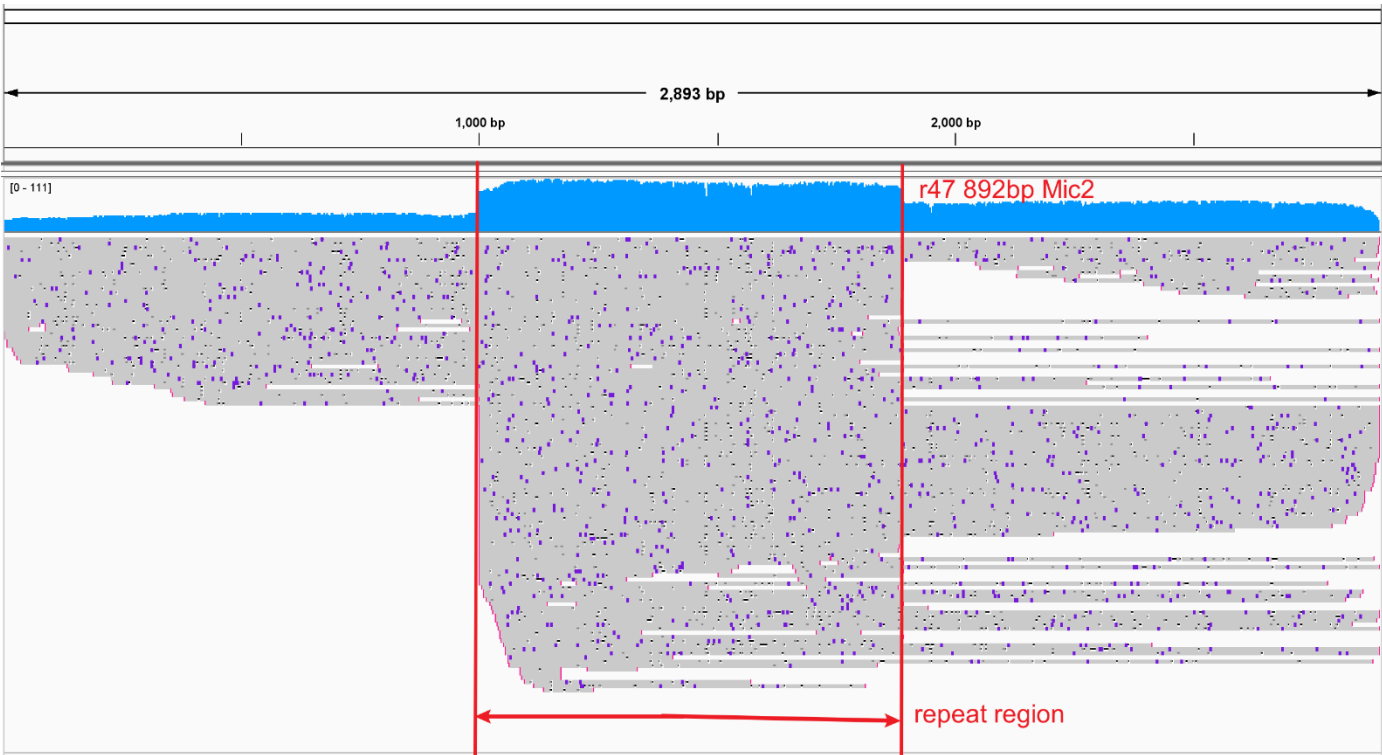

Figure S2 Mapping results of Nanopore and Illumina reads to the mitochondrial chromosomes 1 (MC1) and 2 (MC2) of the *S. officinalis*. Panels a and b show the mapping results of the Nanopore reads to MC1 and MC2, respectively. Panels c and d show the mapping results of all Illumina reads to the MC1 and MC2, respectively. The X-axis shows the nucleotide position, and the Y-axis shows the corresponding coverage depth.

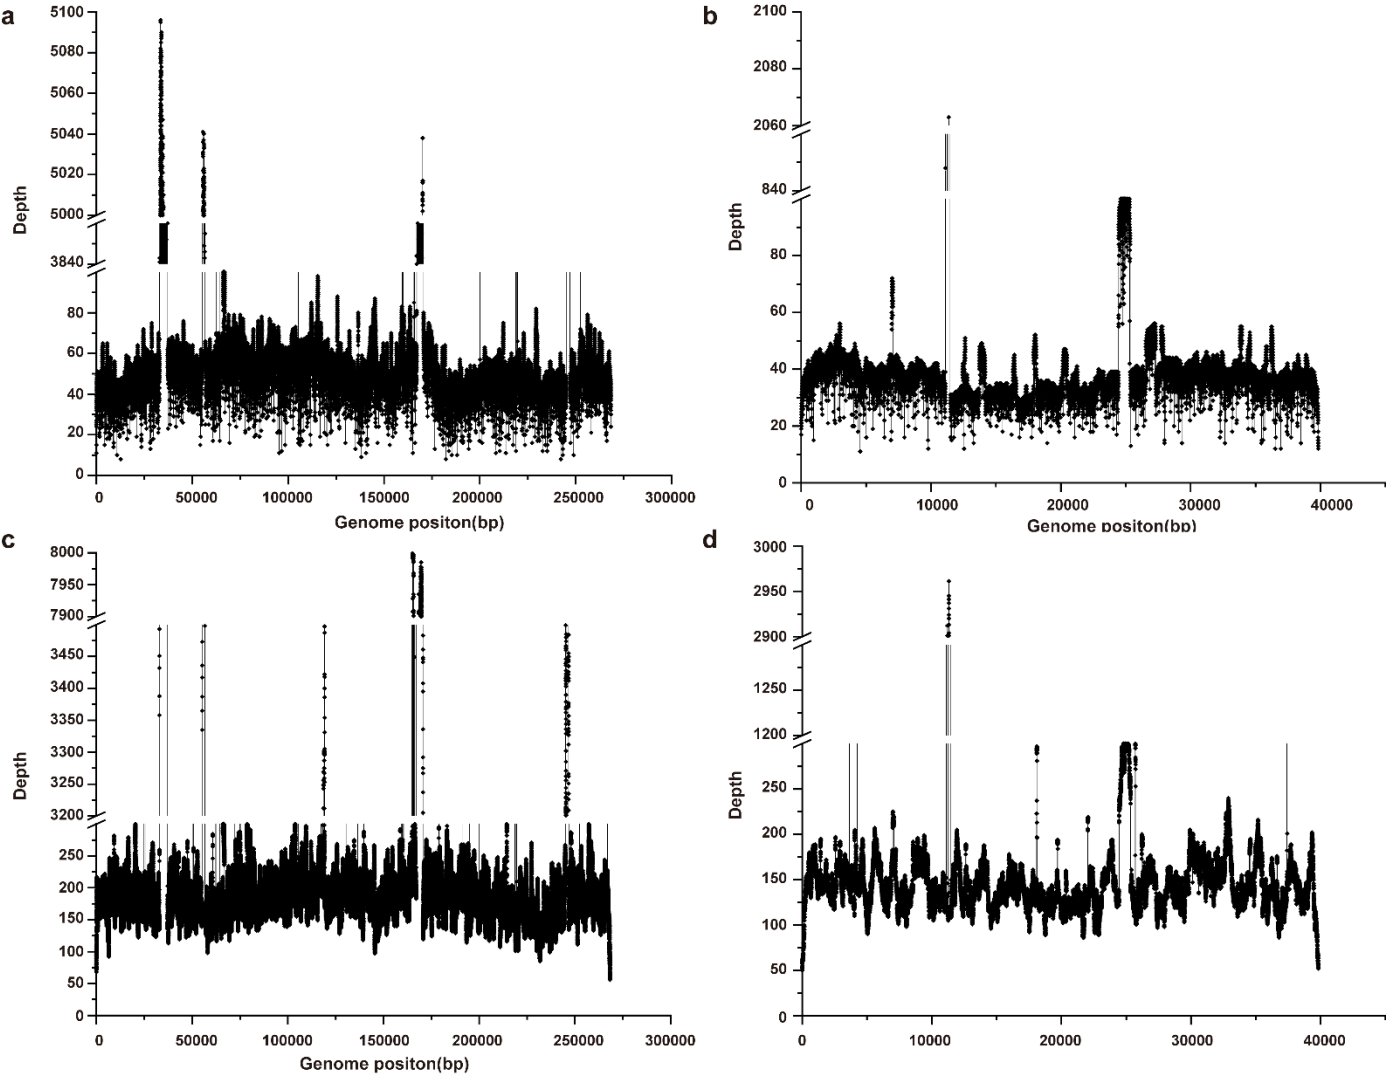



Figure S3 Validation of the presence of the four conformations c1-4 of DBS01, DBS02, and DBS03, corresponding to the recombination products mediated by the three repeats R01, R02, and R47. PCR primers were designed based on the four conformations. The genomic DNA were then amplified by PCR, and the PCR products were subject to Sanger sequencing. The sequencing chromatograms, the Sanger sequencing results (labeled with “PCR” and conformation number), the expected sequences (labeled with repeat id and conformation number), and the consensus sequences are shown at the top of chromatograms and below the chromatograms. Panels a-i correspond to DBS01, DBS02, and DBS03, affiliated with the repetitive sequences r01, r02, and r47. The sequences of r01, r02, and r047 were high-lighted in bold red.

a comparison of the sequence obtained from PCR amplification and Sanger sequencing (R01-C1) and the expected sequence.

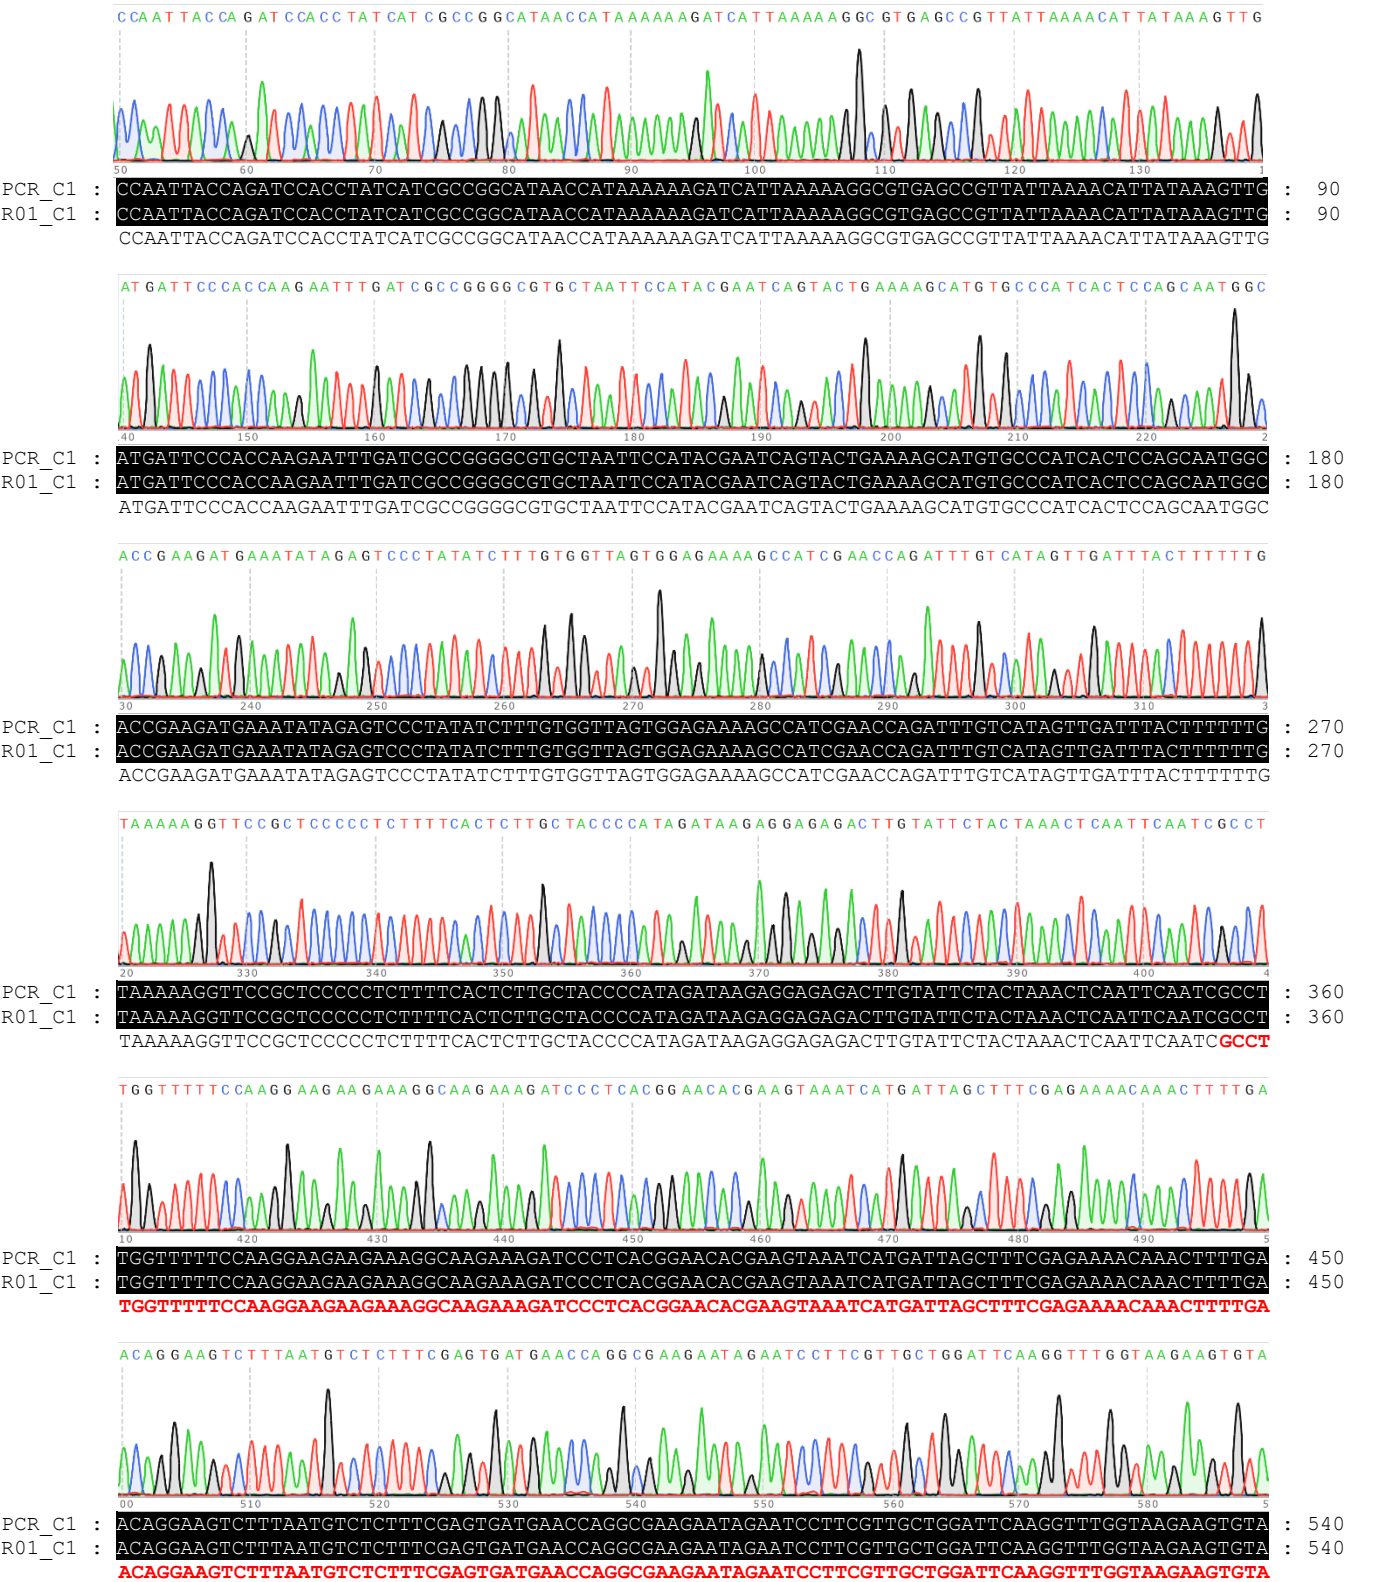

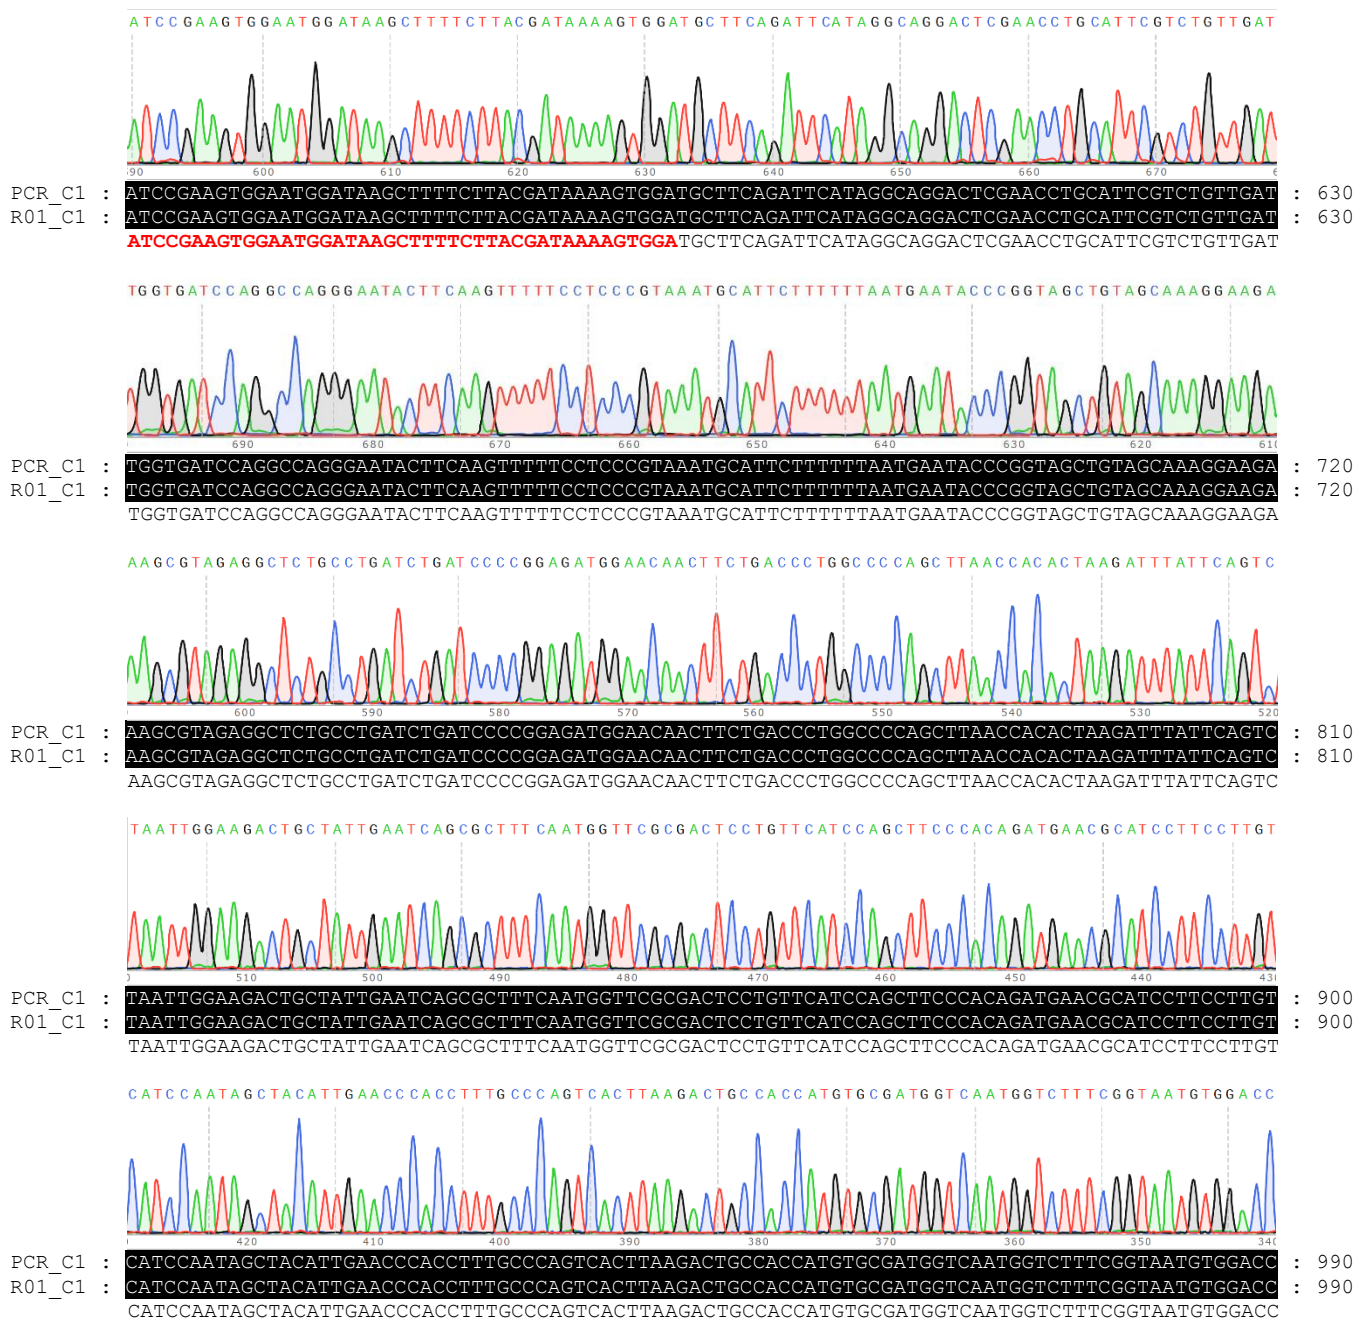

b comparison of the sequence obtained from PCR amplification and Sanger sequencing (R01-C2) and the expected sequence.

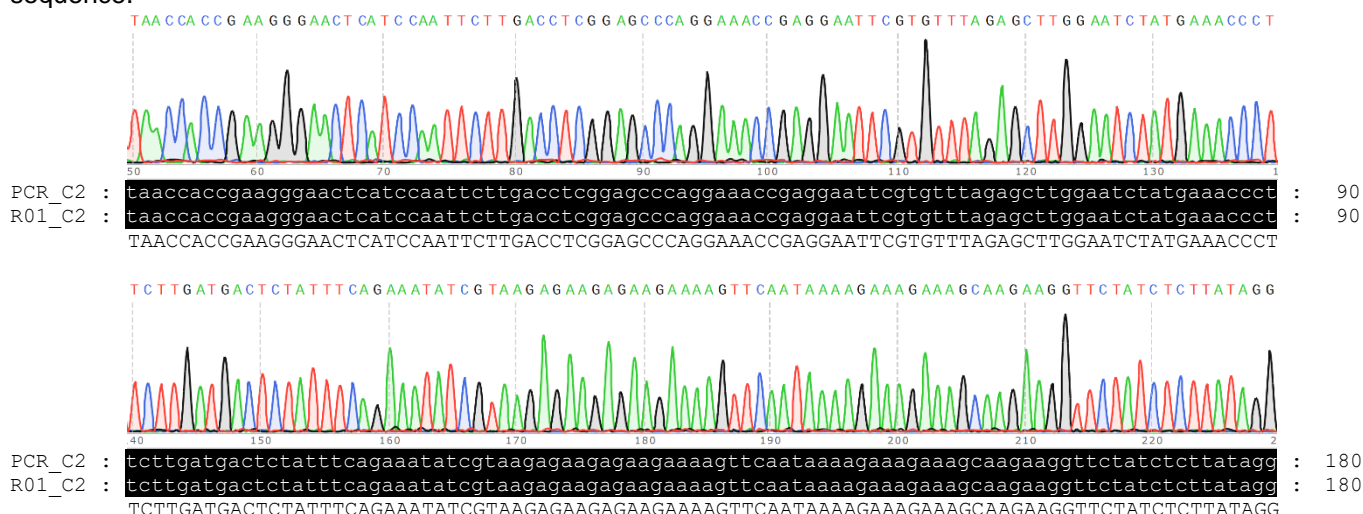

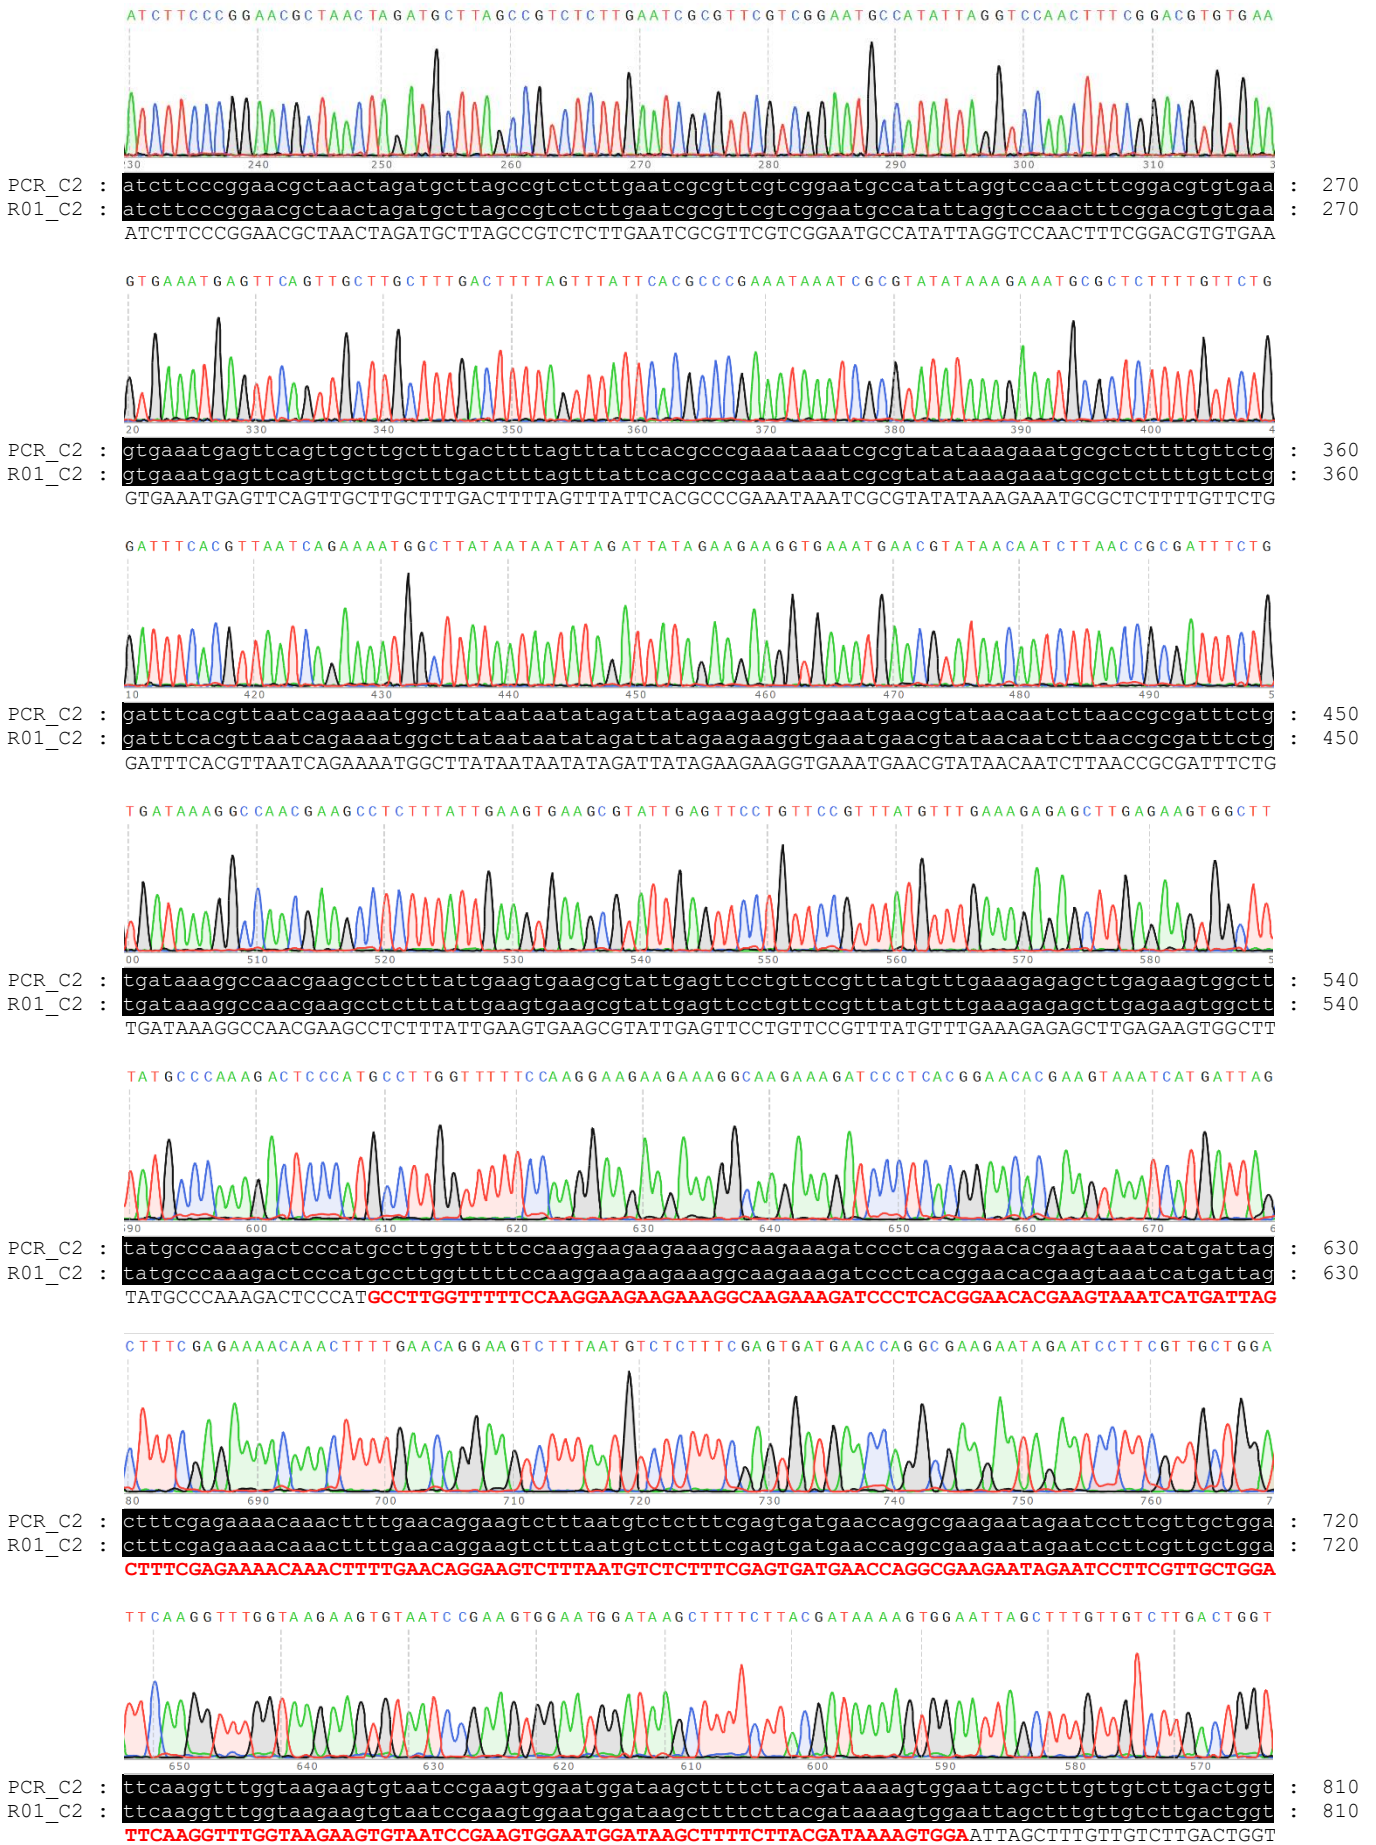



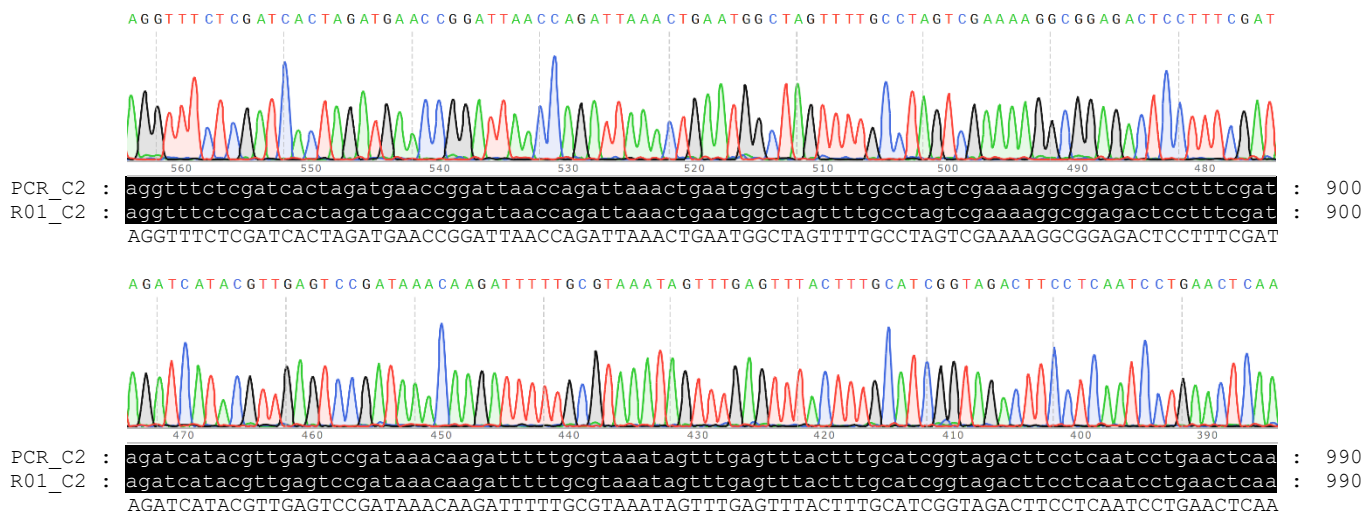

c comparison of the sequence obtained from PCR amplification and Sanger sequencing (R01-C3) and the expected sequence.

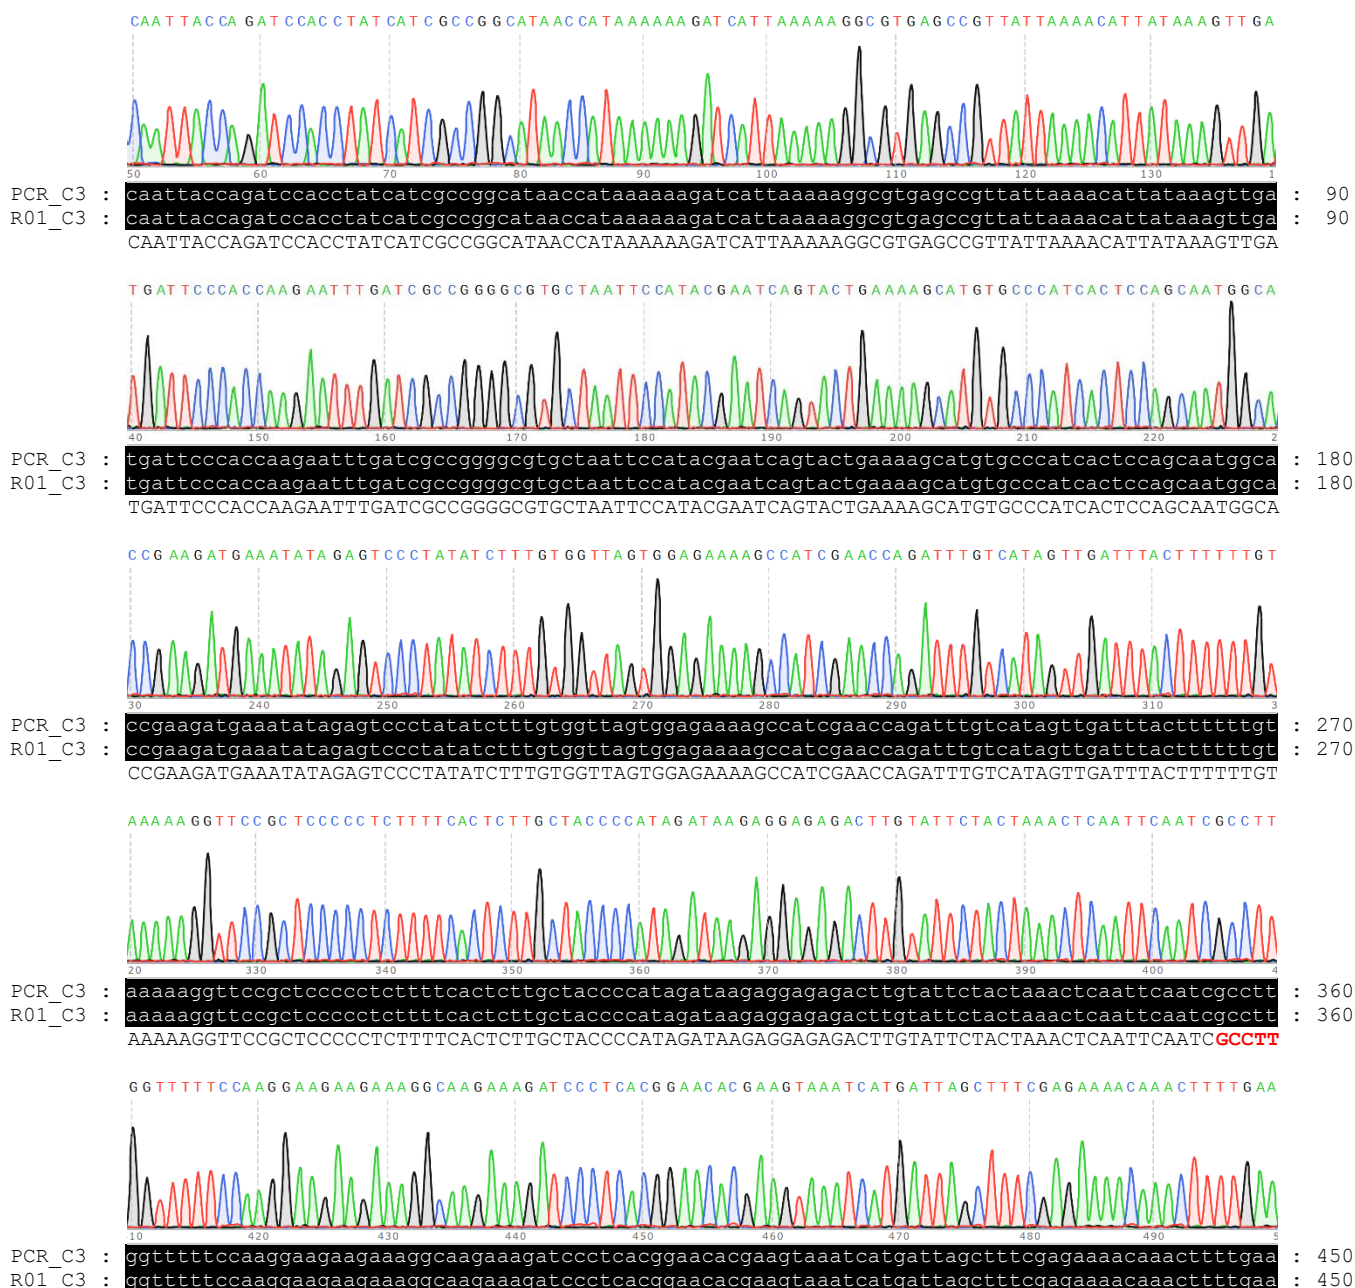

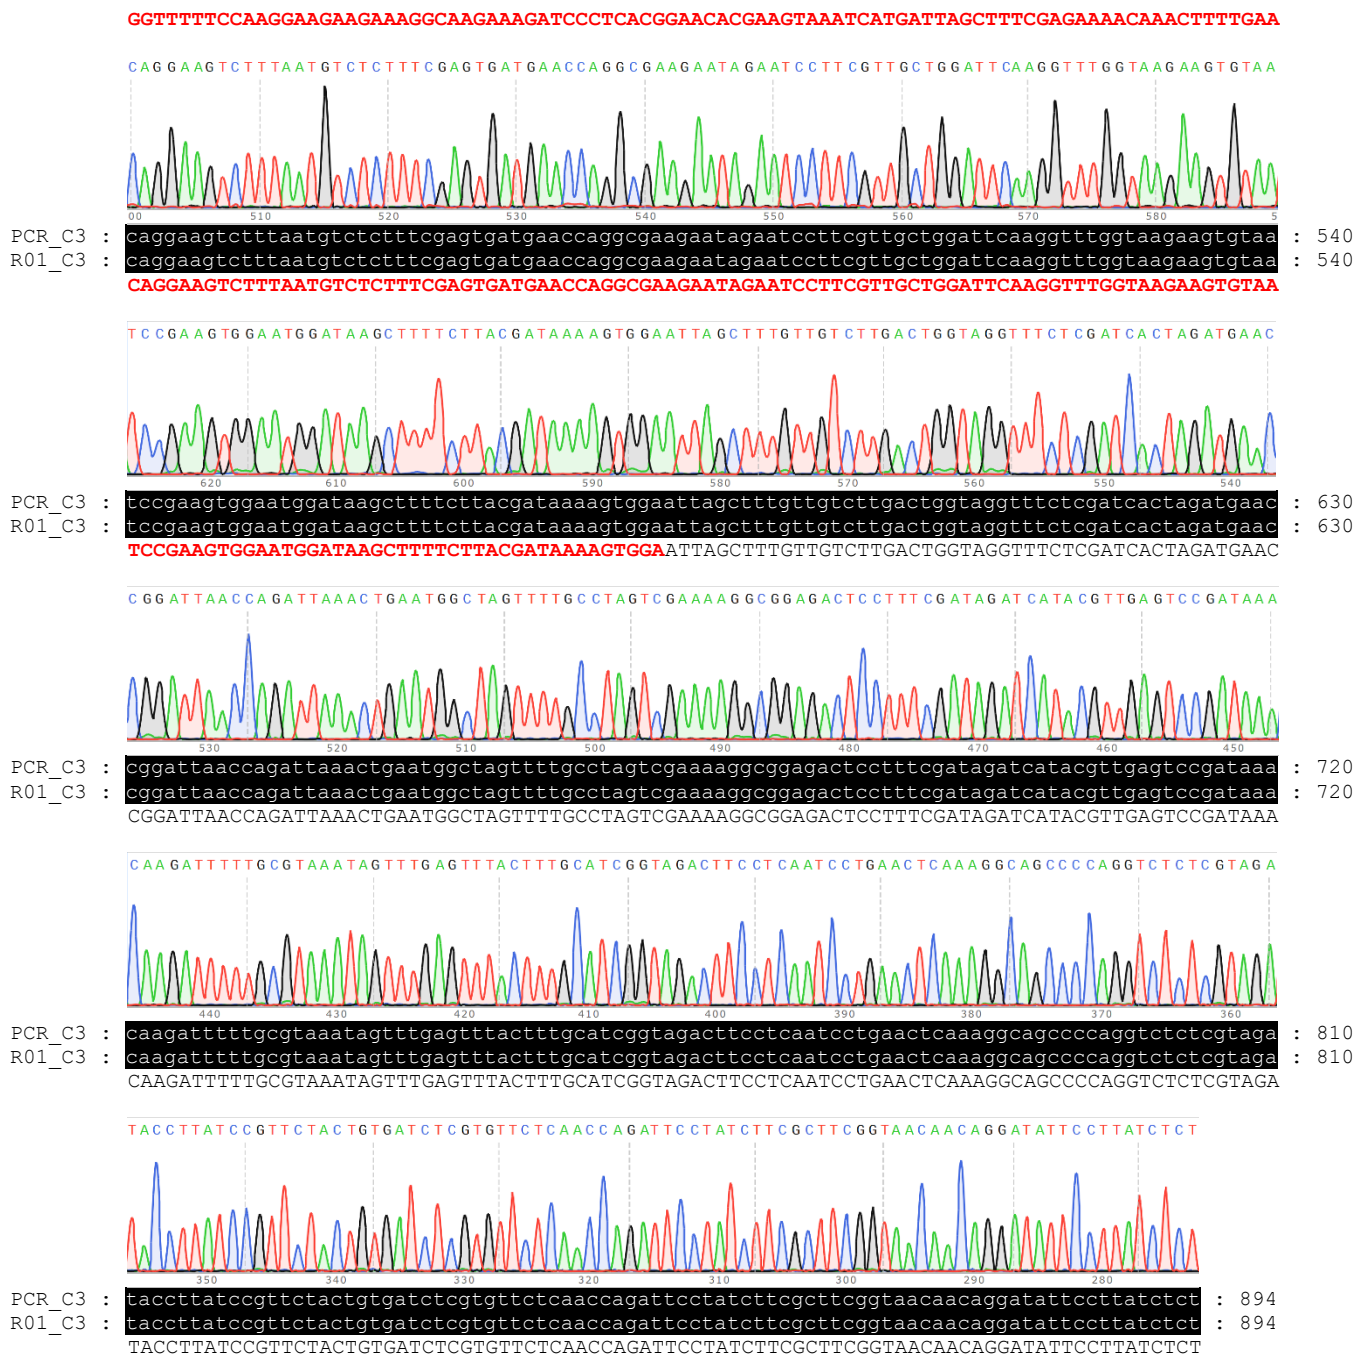

d comparison of the sequence obtained from PCR amplification and Sanger sequencing (R01-C4) and the expected sequence.

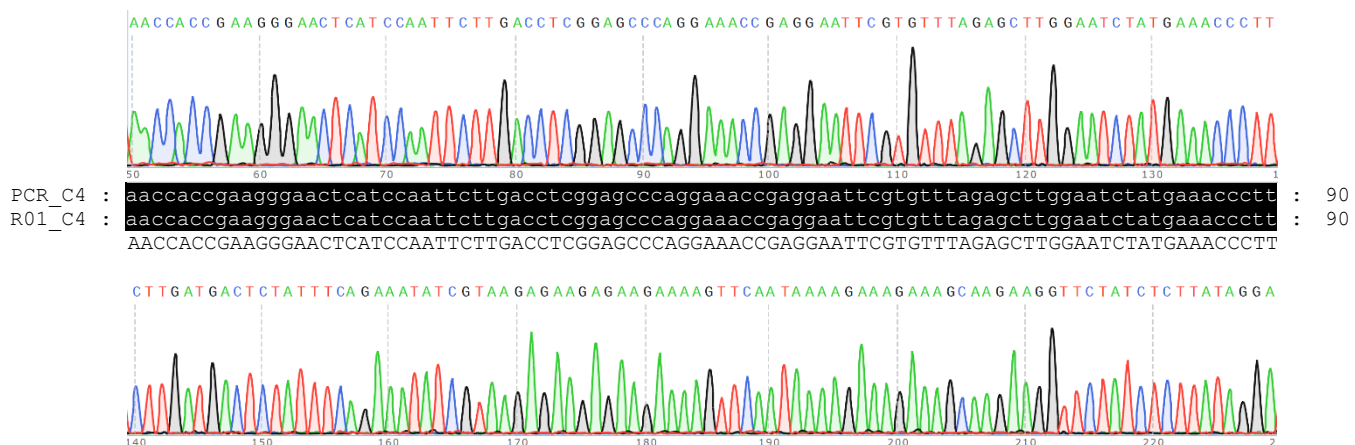

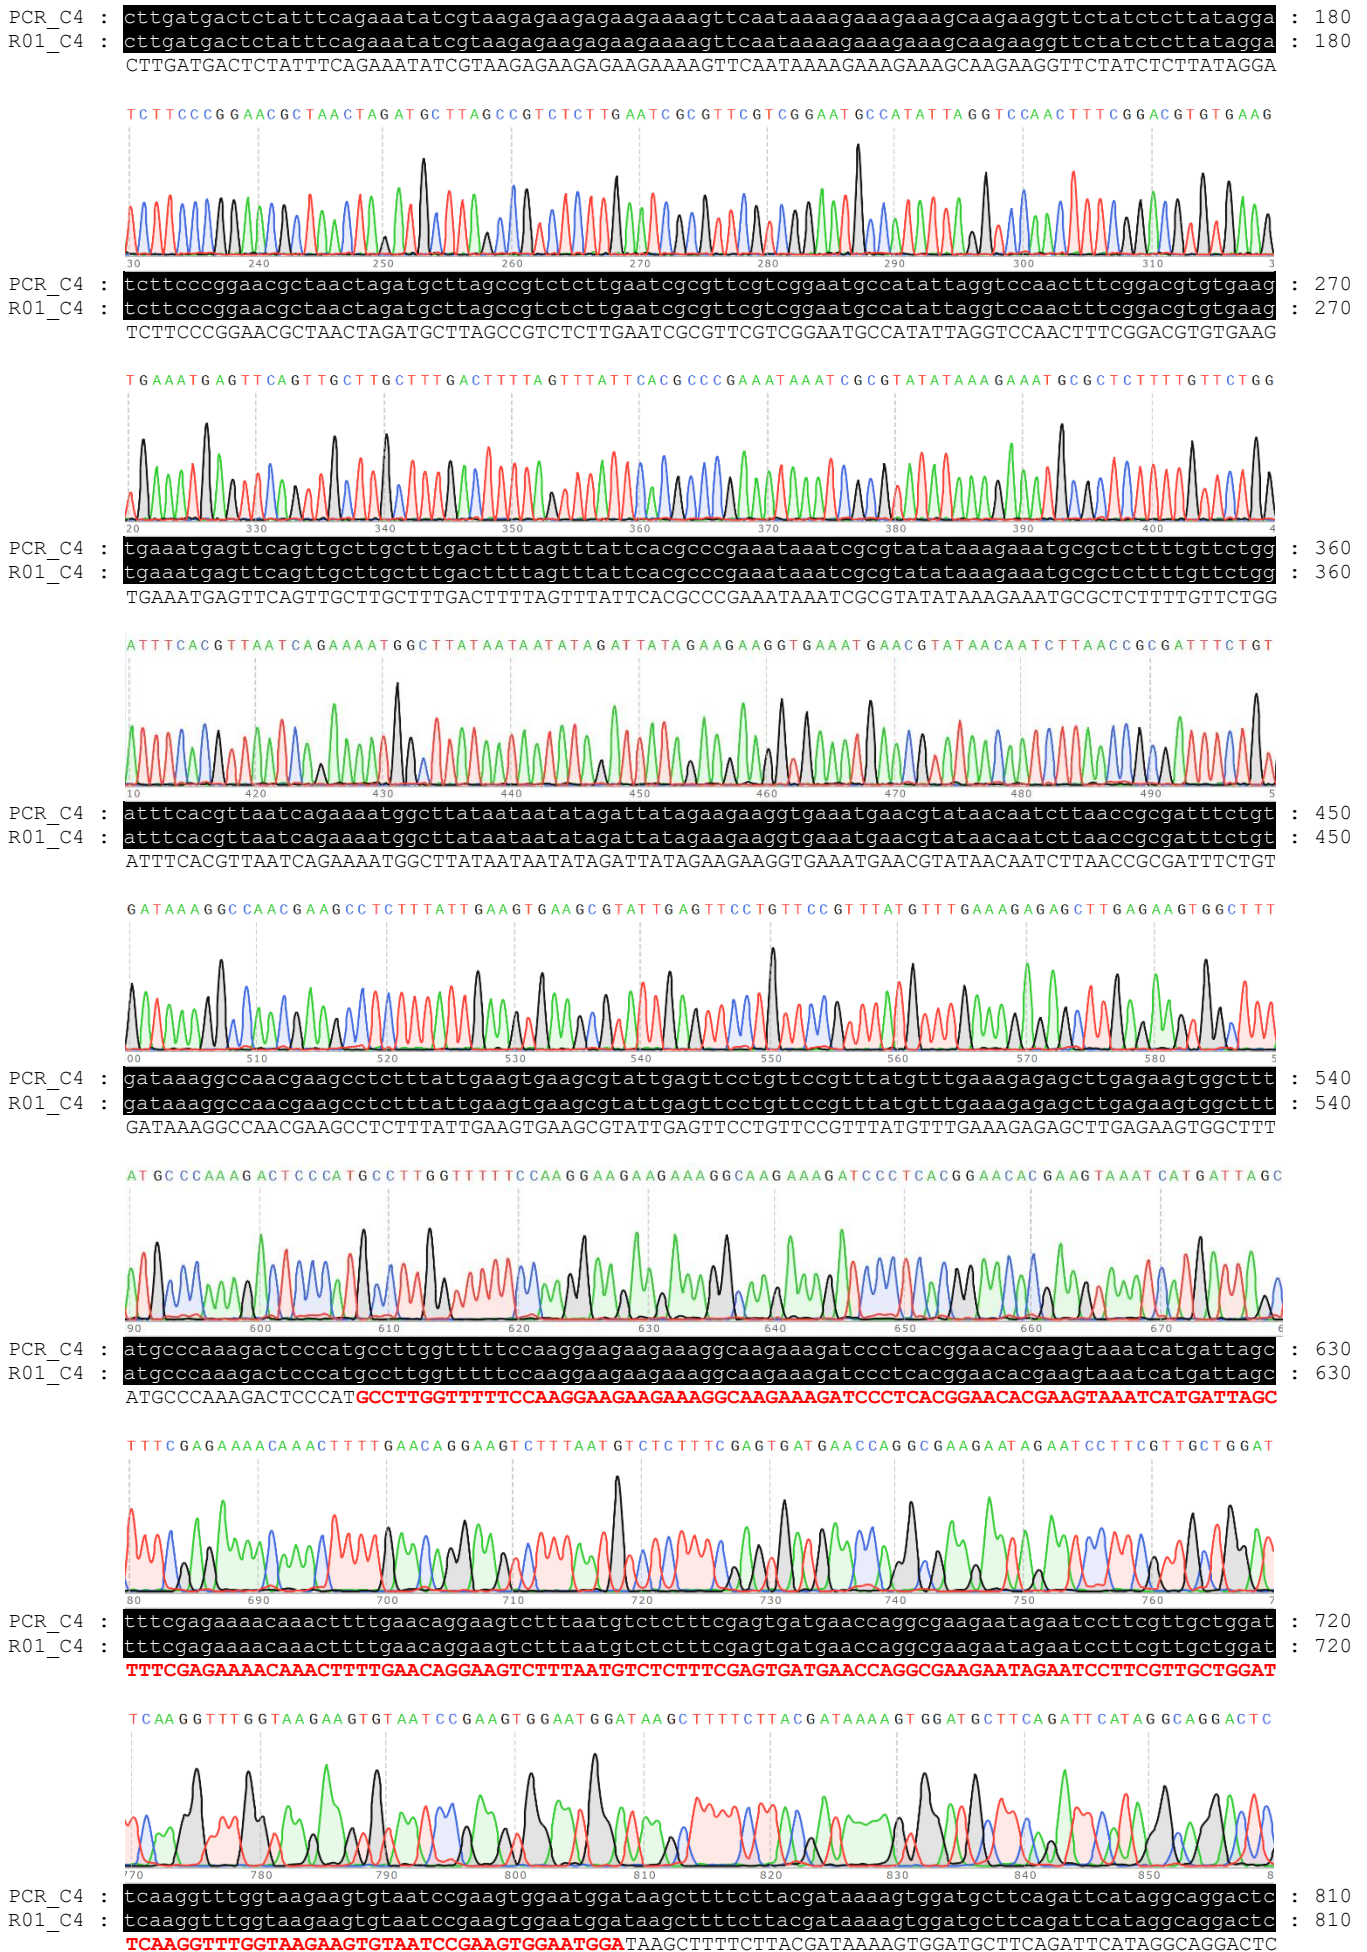



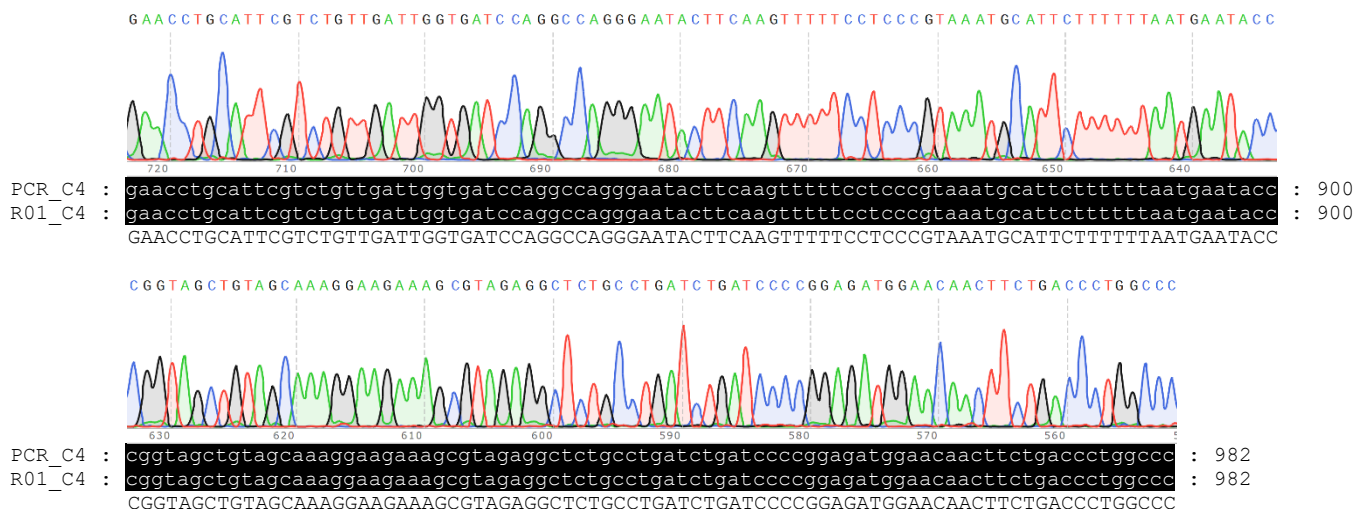

e comparison of the sequence obtained from PCR amplification and Sanger sequencing (R02-C1) and the expected sequence.

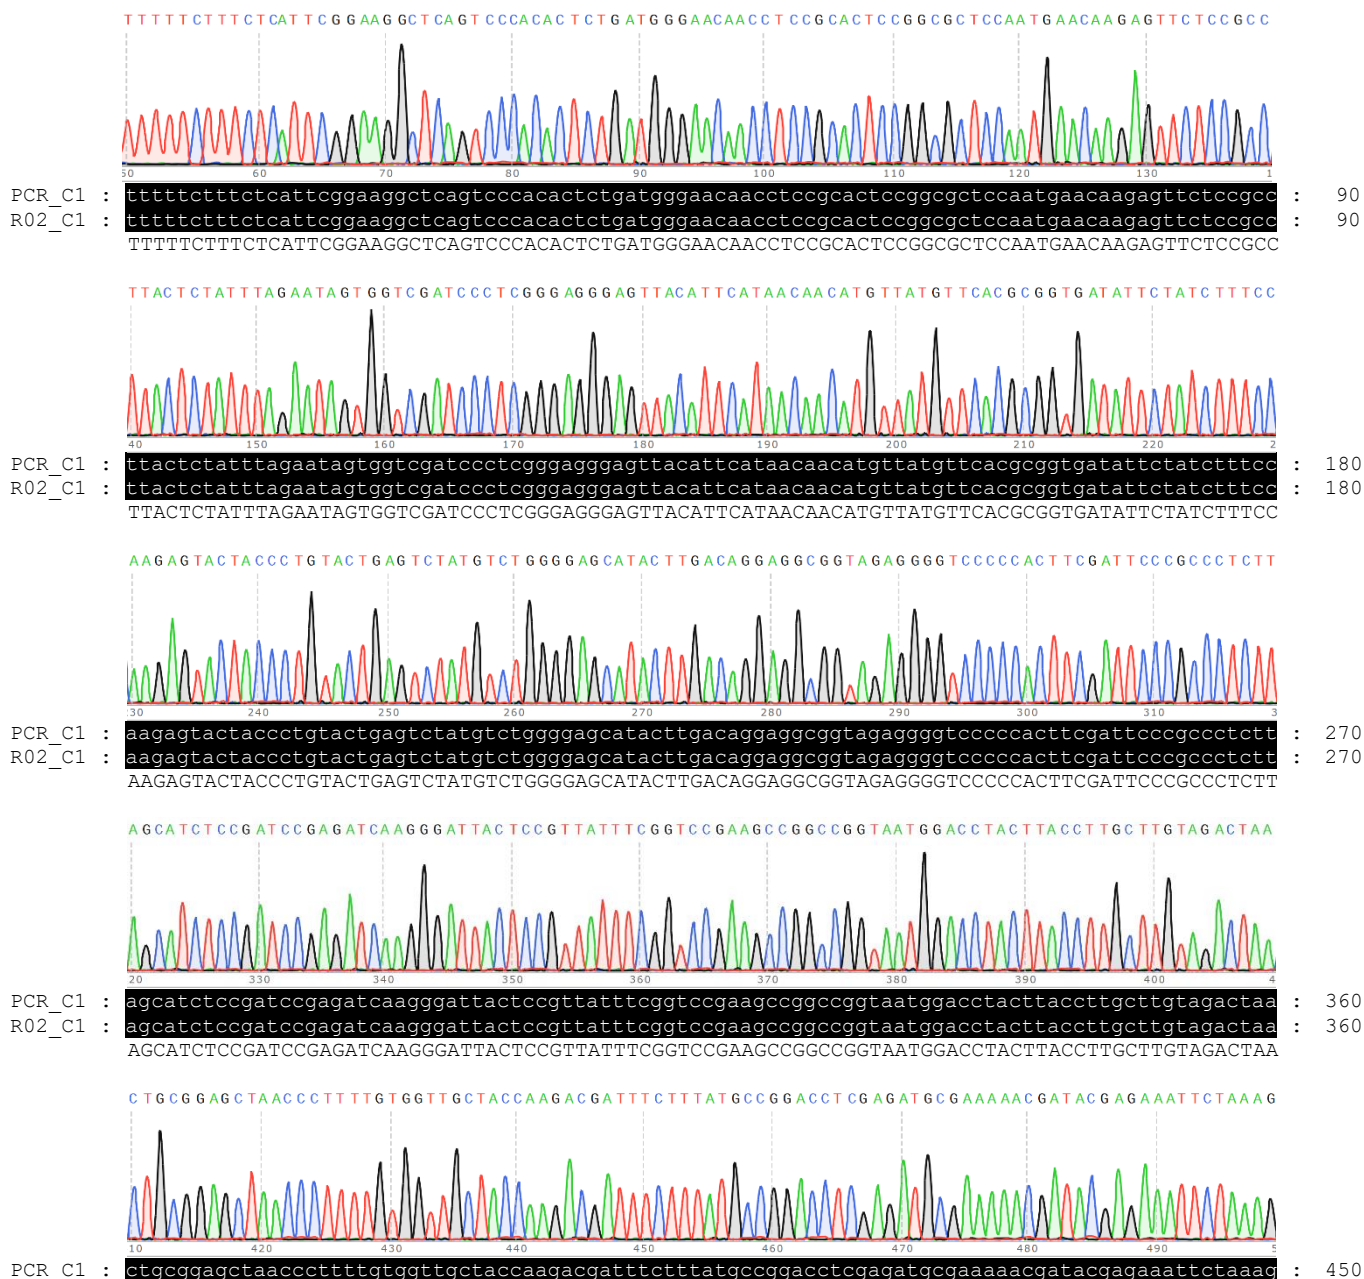

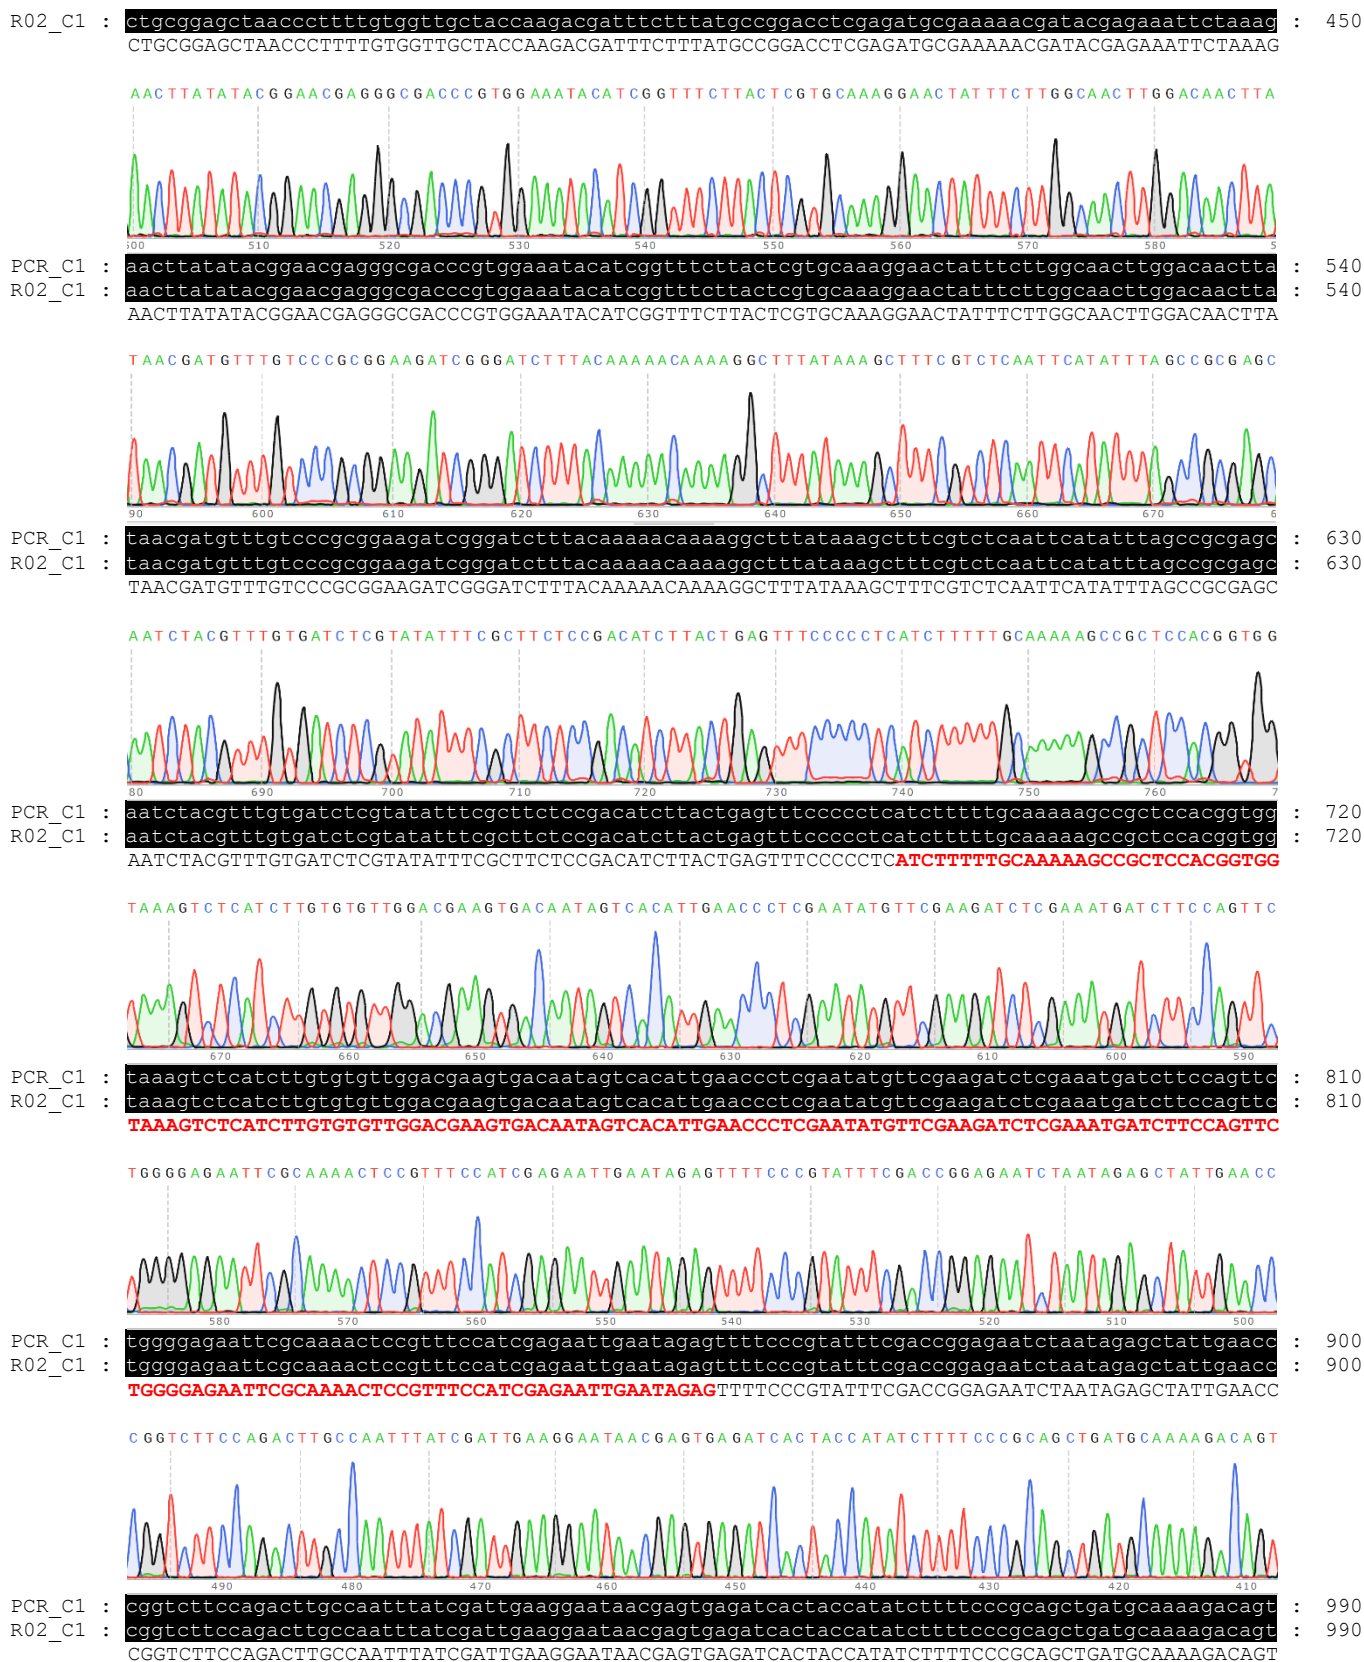

f comparison of the sequence obtained from PCR amplification and Sanger sequencing (R02-C2) and the expected sequence.





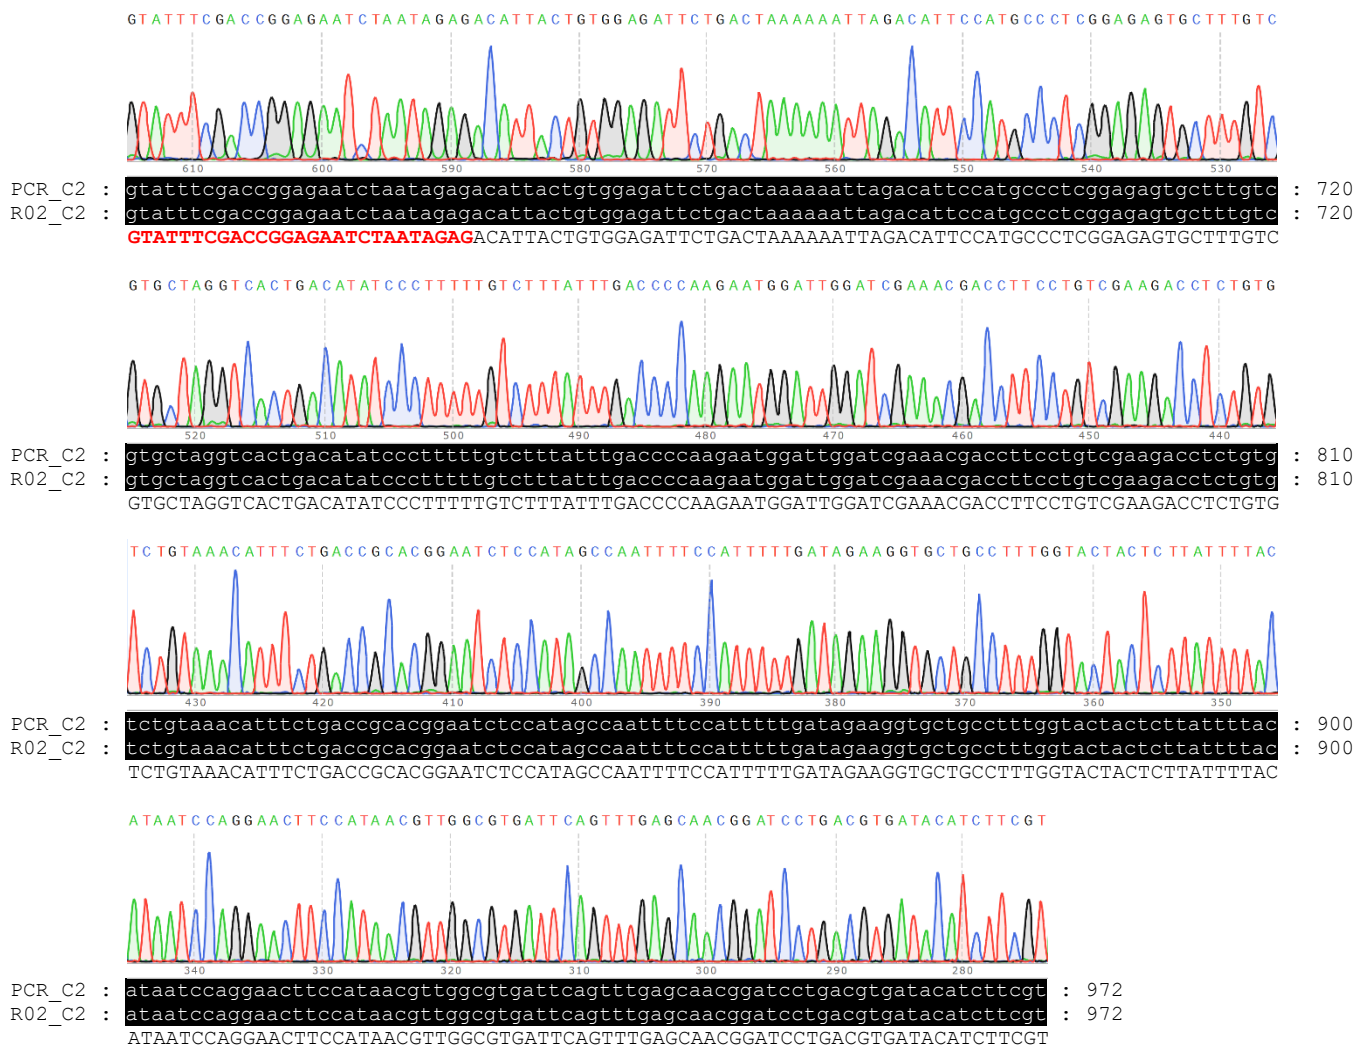

g comparison of the sequence obtained from PCR amplification and Sanger sequencing (R02-C3) and the expected sequence.

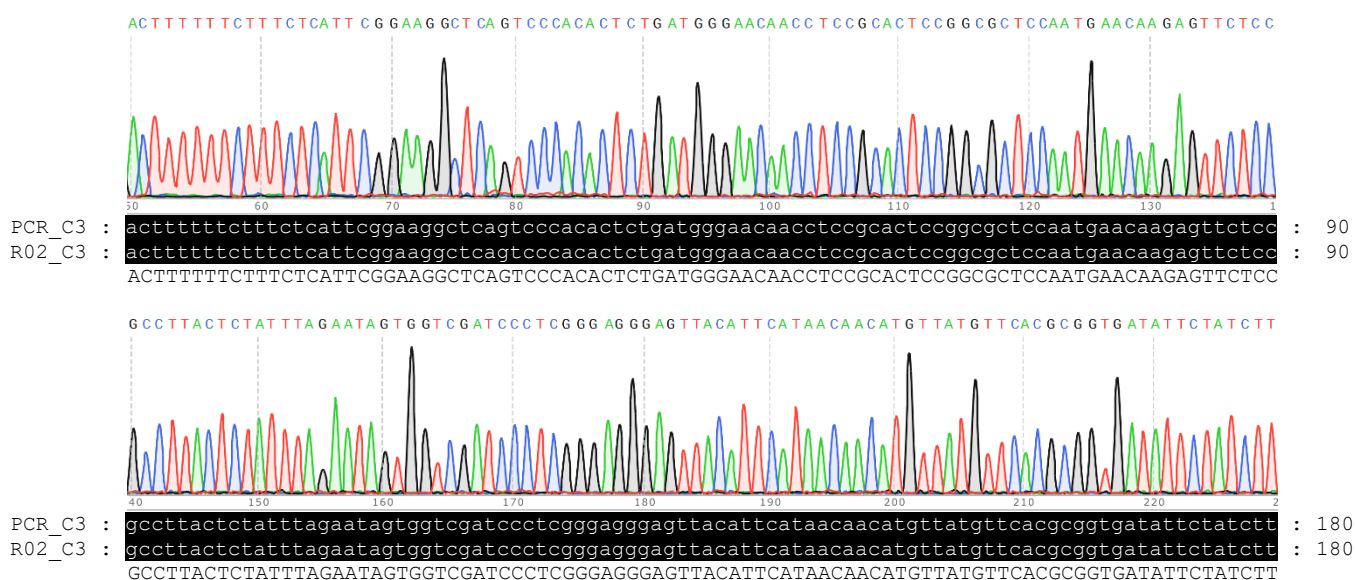

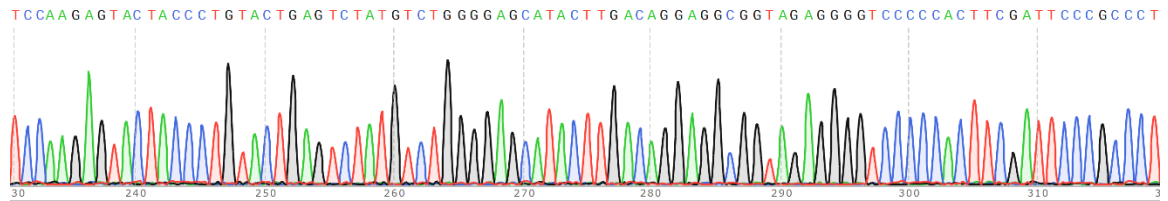

PCR\_C3 : tccaagagtactaccctgtactgagctatgtctgtgggagcatacttgacaggaggcggtagaggggtccccacttcgattcccgccct : 270  
 R02\_C3 : tccaagagtactaccctgtactgagctatgtctgtgggagcatacttgacaggaggcggtagaggggtccccacttcgattcccgccct : 270  
 TCCAAGAGTACTACCCCTGACTGAGTCTATGTCTGGGGAGCATACTTGACAGGAGGCGGTAGAGGGTCCCCACTTCGATTCCCGCCCT

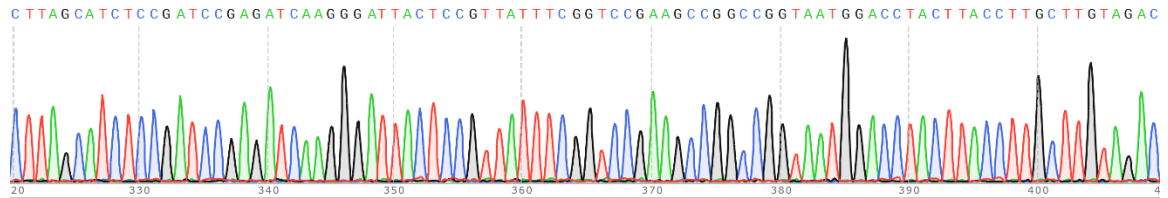

PCR\_C3 : cttagcatctccgatccgagatcaagggtactccgttatttcgggtccgaagcggcggtaatggacctacttaccttgcttgtagac : 360  
 R02\_C3 : cttagcatctccgatccgagatcaagggtactccgttatttcgggtccgaagcggcggtaatggacctacttaccttgcttgtagac : 360  
 CTTAGCATCTCCGATCCGAGATCAAGGGATTACTCCGTTATTTTCGGTCCGAAGCGGCGGTAATGGACCTACTTACCTTGCTTGAGAC

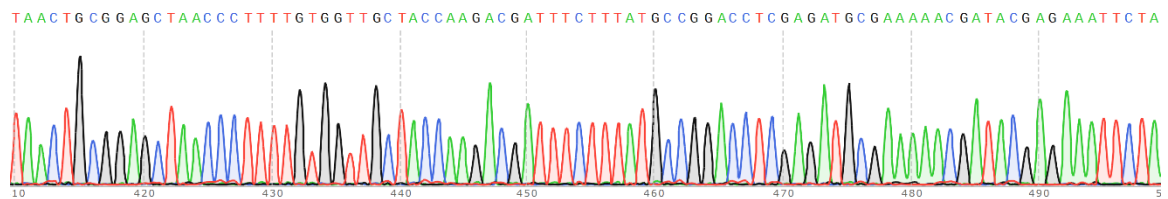

PCR\_C3 : taactgcgagctaaccttttgtggtgtctaccaagacgatttcttattgccggacctcgagatgcgaaaaacgatacagagaaattcta : 450  
 R02\_C3 : taactgcgagctaaccttttgtggtgtctaccaagacgatttcttattgccggacctcgagatgcgaaaaacgatacagagaaattcta : 450  
 TAACTGCGGAGCTAACCTTTTGTGGTGTCTACCAAGACGATTCTTTATGCCGGACCTCGAGATGCGAAAAACGATACGAGAAATTCTA

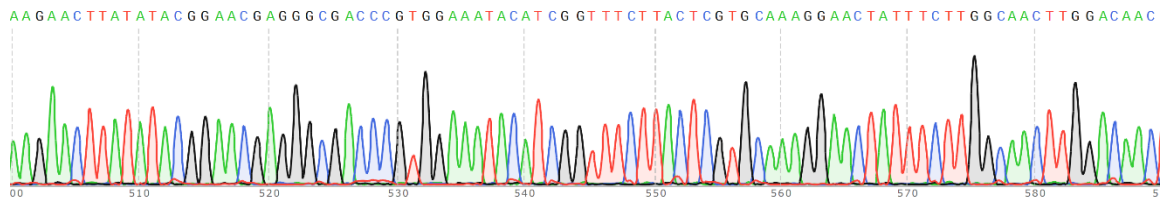

PCR\_C3 : aagaacttataatcgggaacgagggcgacccgtggaataacatcggtttcttactcgtgcaaaggaactatttcttggcaacttggacaac : 540  
 R02\_C3 : aagaacttataatcgggaacgagggcgacccgtggaataacatcggtttcttactcgtgcaaaggaactatttcttggcaacttggacaac : 540  
 AAGAACTTATATACGGAACGAGGCGACCCGTGGAATACATCGGTTTCTTACTCGTGCAAAGGAACCTATTCTTGGCAACTTGGACAAC

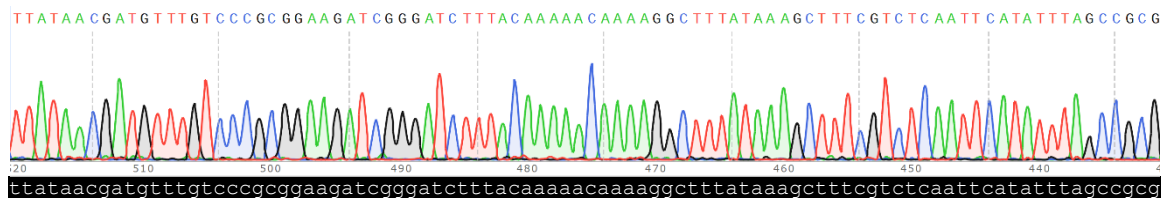

PCR\_C3 : ttataacgatgtttgtcccgcggaagatcgggatctttacaaaaacaaaaggctttataaagctttcgtctcaattcatatttagccgcg : 630  
 R02\_C3 : ttataacgatgtttgtcccgcggaagatcgggatctttacaaaaacaaaaggctttataaagctttcgtctcaattcatatttagccgcg : 630  
 TTATAACGATGTTTGTCCCGCGAAGATCGGGATCTTTACAAAAACAAAAGGCTTTATAAAGCTTTCGTCGAATTATTTAGCCGCG

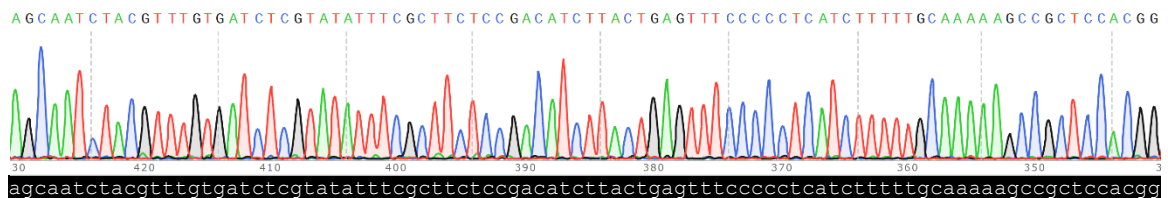

PCR\_C3 : agcaatctacgtttgtgatctcgtatatttcgcttctccgacatcttactgagtttccctctcatcttttgcacaaaagcgctccacgg : 720  
 R02\_C3 : agcaatctacgtttgtgatctcgtatatttcgcttctccgacatcttactgagtttccctctcatcttttgcacaaaagcgctccacgg : 720  
 AGCAATCTACGTTTGTGATCTCGTATTTTCGCTTCTCCGACATCTTACTGAGTTTCCCTCTCATTTTTGCAAAAAGCGCTCCACGG

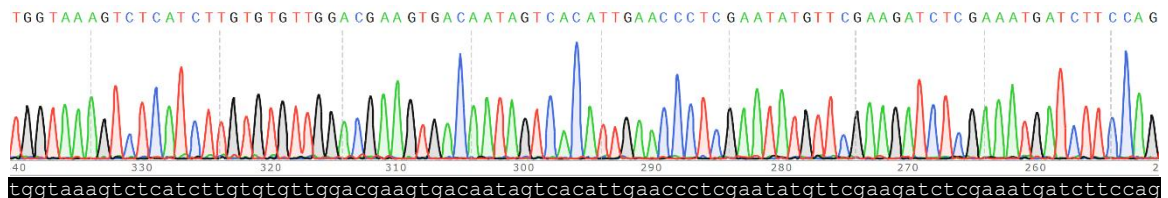

PCR\_C3 : tggtaaagtctcatcttgtgtgttggacgaagtgcacattgaacctcgaatatgttcgaagatctcgaaatgatcttccag : 810  
 R02\_C3 : tggtaaagtctcatcttgtgtgttggacgaagtgcacattgaacctcgaatatgttcgaagatctcgaaatgatcttccag : 810  
**TGGTAAAGTCTCATCTTGTGTTGGACGAAGTGACAAATAGTCACATTGAACCTCGAATATGTTTGAAGATCTCGAAATGATCTTCCAG**

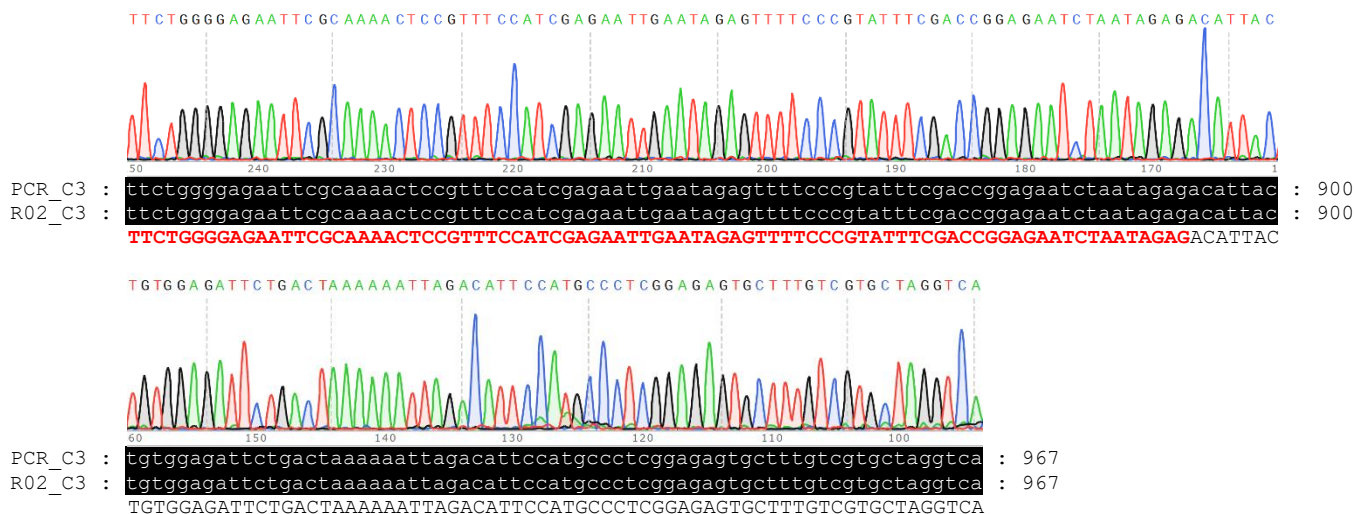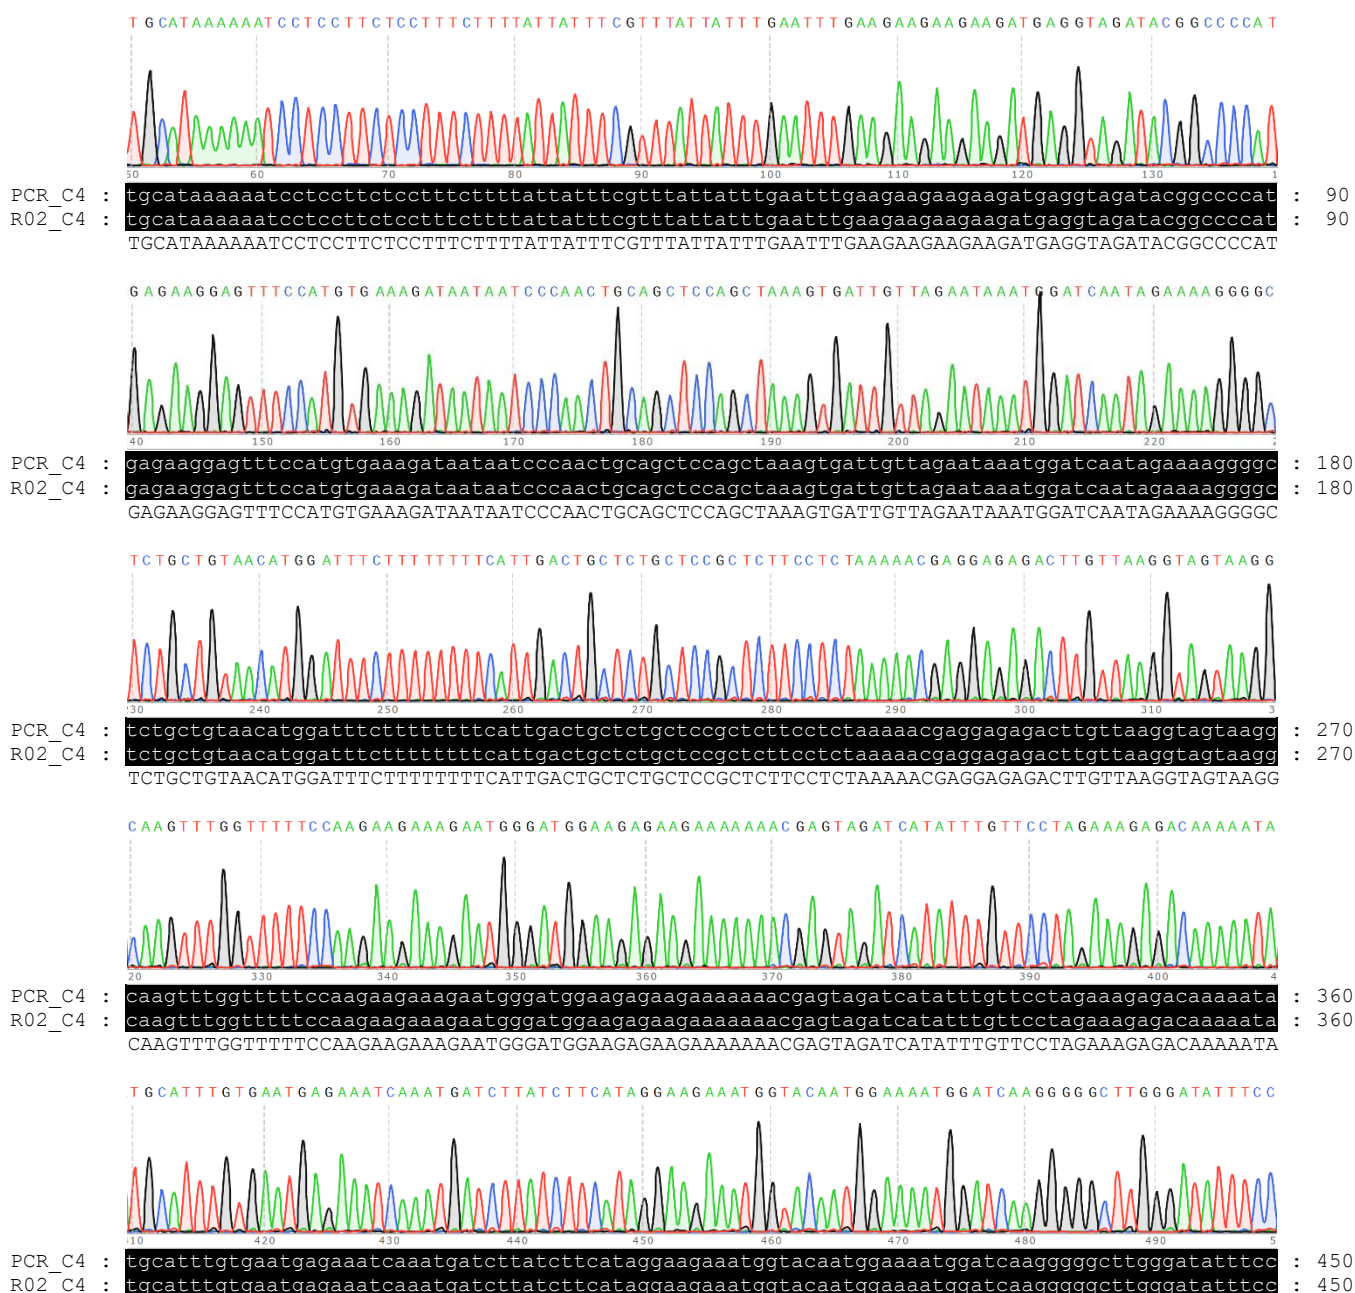



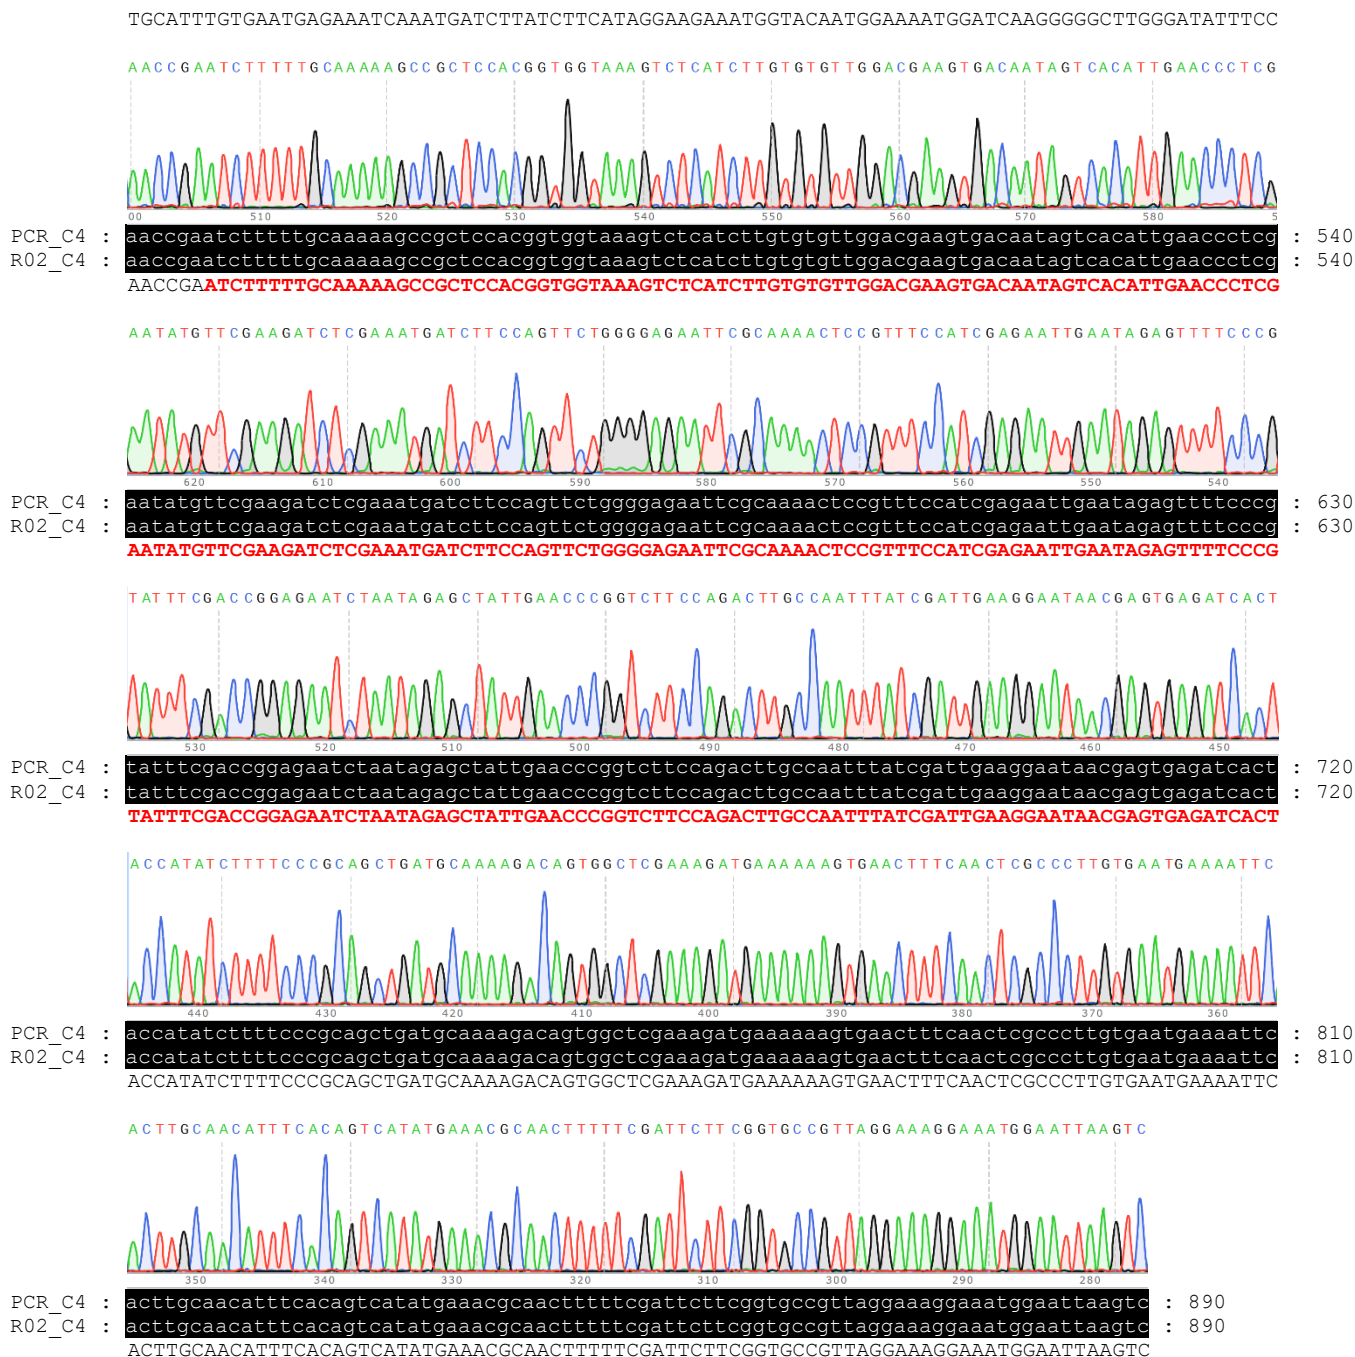

i comparison of the sequence obtained from PCR amplification and Sanger sequencing (R47-C1) and the expected sequence.

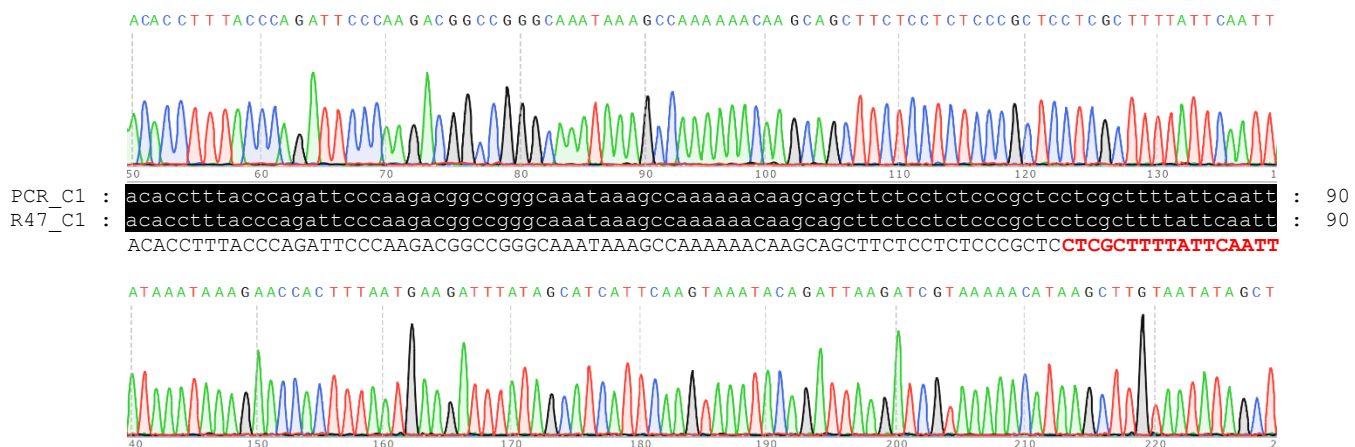

The figure displays 10 Sanger sequencing chromatograms, each representing a specific region of a DNA sequence. Each chromatogram compares two samples: PCR\_C1 (top trace) and R47\_C1 (bottom trace). The DNA sequence is shown above the traces, with a red highlight indicating a mismatch between the two samples. The chromatograms show peaks for A (green), C (blue), G (black), and T (red). The regions are numbered 1 through 10, corresponding to the sequence positions indicated in the table below.

| Region | PCR_C1 Sequence                                                                              | R47_C1 Sequence                                                                              | Mismatch                                                                                     |
|--------|----------------------------------------------------------------------------------------------|----------------------------------------------------------------------------------------------|----------------------------------------------------------------------------------------------|
| 1      | ataataaagaacacactttaatgaagatttatagcatcattccaagtaaatacagattaaagatcgtaaaaacataagcttgtaatatagct | ataataaagaacacactttaatgaagatttatagcatcattccaagtaaatacagattaaagatcgtaaaaacataagcttgtaatatagct | ATAAATAAGAACCACCTTTAATGAAGATTTATAGCATCATTC AAGTAAATACAGATTAAAGATCGTAAAAACATAAGCTTGTAATATAGCT |
| 2      | acgcctaattccagaccagtttaagtgaagaactataaagaagacgtgtagaccctatgaataaaaaagatcattcatatagcata       | acgcctaattccagaccagtttaagtgaagaactataaagaagacgtgtagaccctatgaataaaaaagatcattcatatagcata       | ACGCCTAATTCCAGACCAGTTAATGCAAGAACTATAAAGAAAGGACCTGTAGACCCTATGAATAAAAAAGATCATTTCATACATAGCATA   |
| 3      | gtccaagcgaaccacttaaaatctttactaaactatgacggccatcatattagcaataaacgtattcctaagcttaattgcgcgaaaa     | gtccaagcgaaccacttaaaatctttactaaactatgacggccatcatattagcaataaacgtattcctaagcttaattgcgcgaaaa     | GTCCAAGCGAACCCACTTAAATCTTTACTAAACTATGACCGGCCATCATATTAGCAAATAAACGTATTCTTAAGCTTAATGCGCGAAAA    |
| 4      | caatgagggattagctcaaggagtaactaaaaaaggggctaaggggaagtgggactcctgcgggtaatgagaagcttaaaaaatgaagacca | caatgagggattagctcaaggagtaactaaaaaaggggctaaggggaagtgggactcctgcgggtaatgagaagcttaaaaaatgaagacca | CAATGAGGGATTAGCTCAAGGAGTACTAAAAAAGGGGCTAAGGGAAGTGGGACTCCTGCGGGTAATGAGAAGCTTAAAAAATGAAGACCA   |
| 5      | ttctttacaaatcccactatagtaagtccaataaaaaagagaaaaatgagagacccaagtaacgataaaatgacttggtactgtgaagcta  | ttctttacaaatcccactatagtaagtccaataaaaaagagaaaaatgagagacccaagtaacgataaaatgacttggtactgtgaagcta  | TTCTTTACAAATCCCACCTATAGTAATGCCAATAAAAAAGAGAAAATGAGAGACCCAAAGTAACGATAAAATGACTTGTTACTGTGAAGCTA |
| 6      | taagggatcataccctgcagattacgaaataacgaaaaagtaaaagtaaccgagatgcaagggaaaaacggttggtttcacattgccagaa  | taagggatcataccctgcagattacgaaataacgaaaaagtaaaagtaaccgagatgcaagggaaaaacggttggtttcacattgccagaa  | TAAGGGATCATACCCTGCAGATTACGAAATAACGAAAAAGTAAAAAGTAACCGAGATGCAAGGGAAAAACGGTTGTTTCACATTGCCAGAA  |
| 7      | agaccacctaattgttgctttaccagggttcggaacaaaatcataaataaagctctaccagggttgccaagcatttggtactgactttcct  | agaccacctaattgttgctttaccagggttcggaacaaaatcataaataaagctctaccagggttgccaagcatttggtactgactttcct  | AGACCACCTATTGTTCGTTTACCAGGTTTCGGAACAAAATCATAAATAAGCTCTACCAGGGATTGCCAAGCATTGGTACTGACTTTTCCT   |
| 8      | cctcccttttttagtaactgtaactgaacgaaaaataaaaaatttagtaactgtaactgaatgaaaagaaatttgagtaactaaatgaaaa  | cctcccttttttagtaactgtaactgaacgaaaaataaaaaatttagtaactgtaactgaatgaaaagaaatttgagtaactaaatgaaaa  | CCTCCCTTTTTTAGTAACGTGTAACGTAACGAAAAATAAAAAATTTAGTAACGTGAATGAAAAGAAATTTGAGTAACATAATGAAAA      |
| 9      | ataataaagaacacactttaatgaagatttatagcatcattccaagtaaatacagattaaagatcgtaaaaacataagcttgtaatatagct | ataataaagaacacactttaatgaagatttatagcatcattccaagtaaatacagattaaagatcgtaaaaacataagcttgtaatatagct | ATAAATAAGAACCACCTTTAATGAAGATTTATAGCATCATTC AAGTAAATACAGATTAAAGATCGTAAAAACATAAGCTTGTAATATAGCT |
| 10     | acgcctaattccagaccagtttaagtgaagaactataaagaagacgtgtagaccctatgaataaaaaagatcattcatatagcata       | acgcctaattccagaccagtttaagtgaagaactataaagaagacgtgtagaccctatgaataaaaaagatcattcatatagcata       | ACGCCTAATTCCAGACCAGTTAATGCAAGAACTATAAAGAAAGGACCTGTAGACCCTATGAATAAAAAAGATCATTTCATACATAGCATA   |

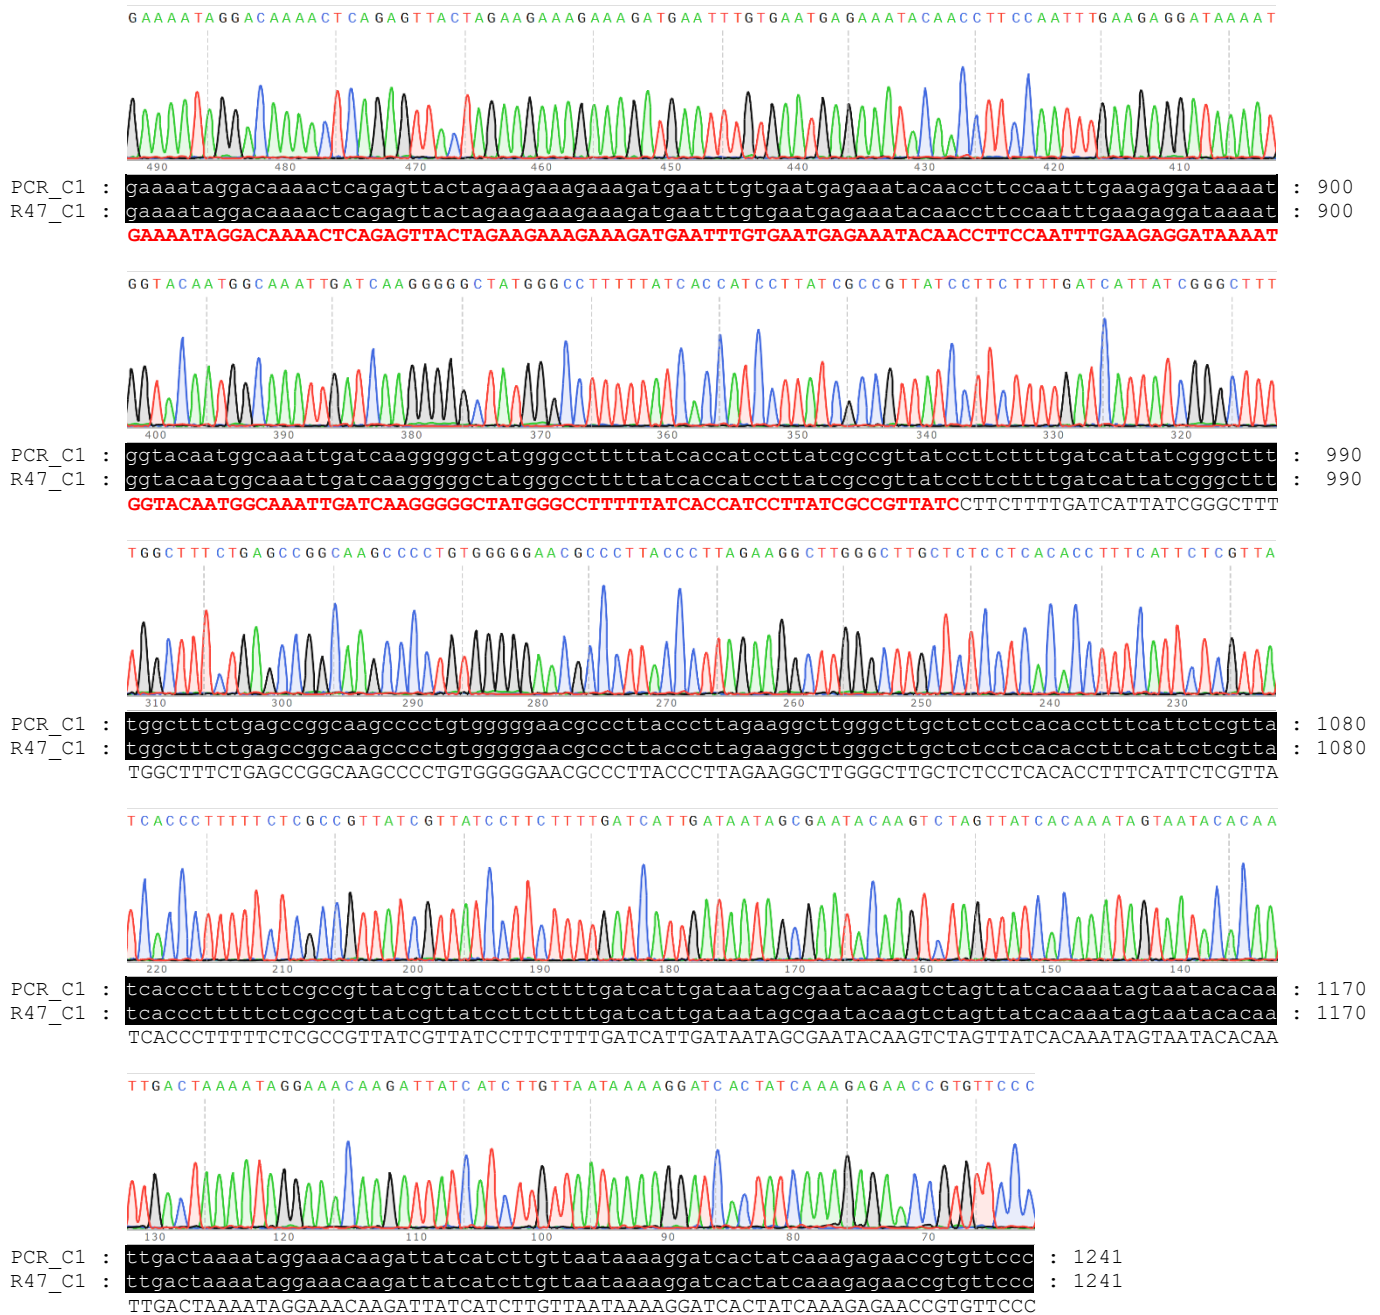

j comparison of the sequence obtained from PCR amplification and Sanger sequencing (R47-C2) and the expected sequence.

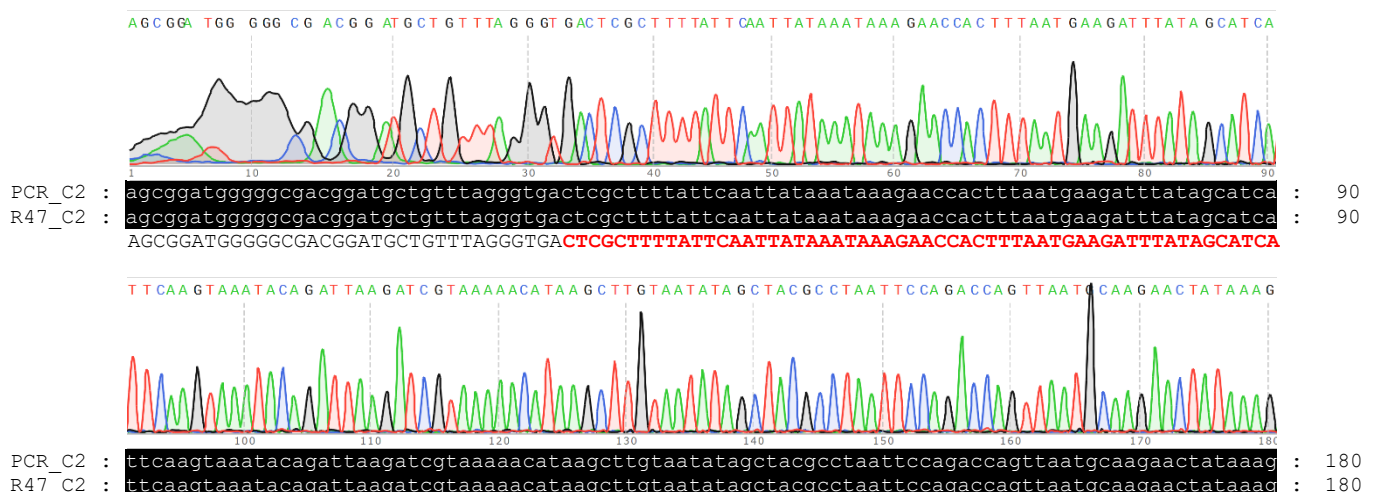





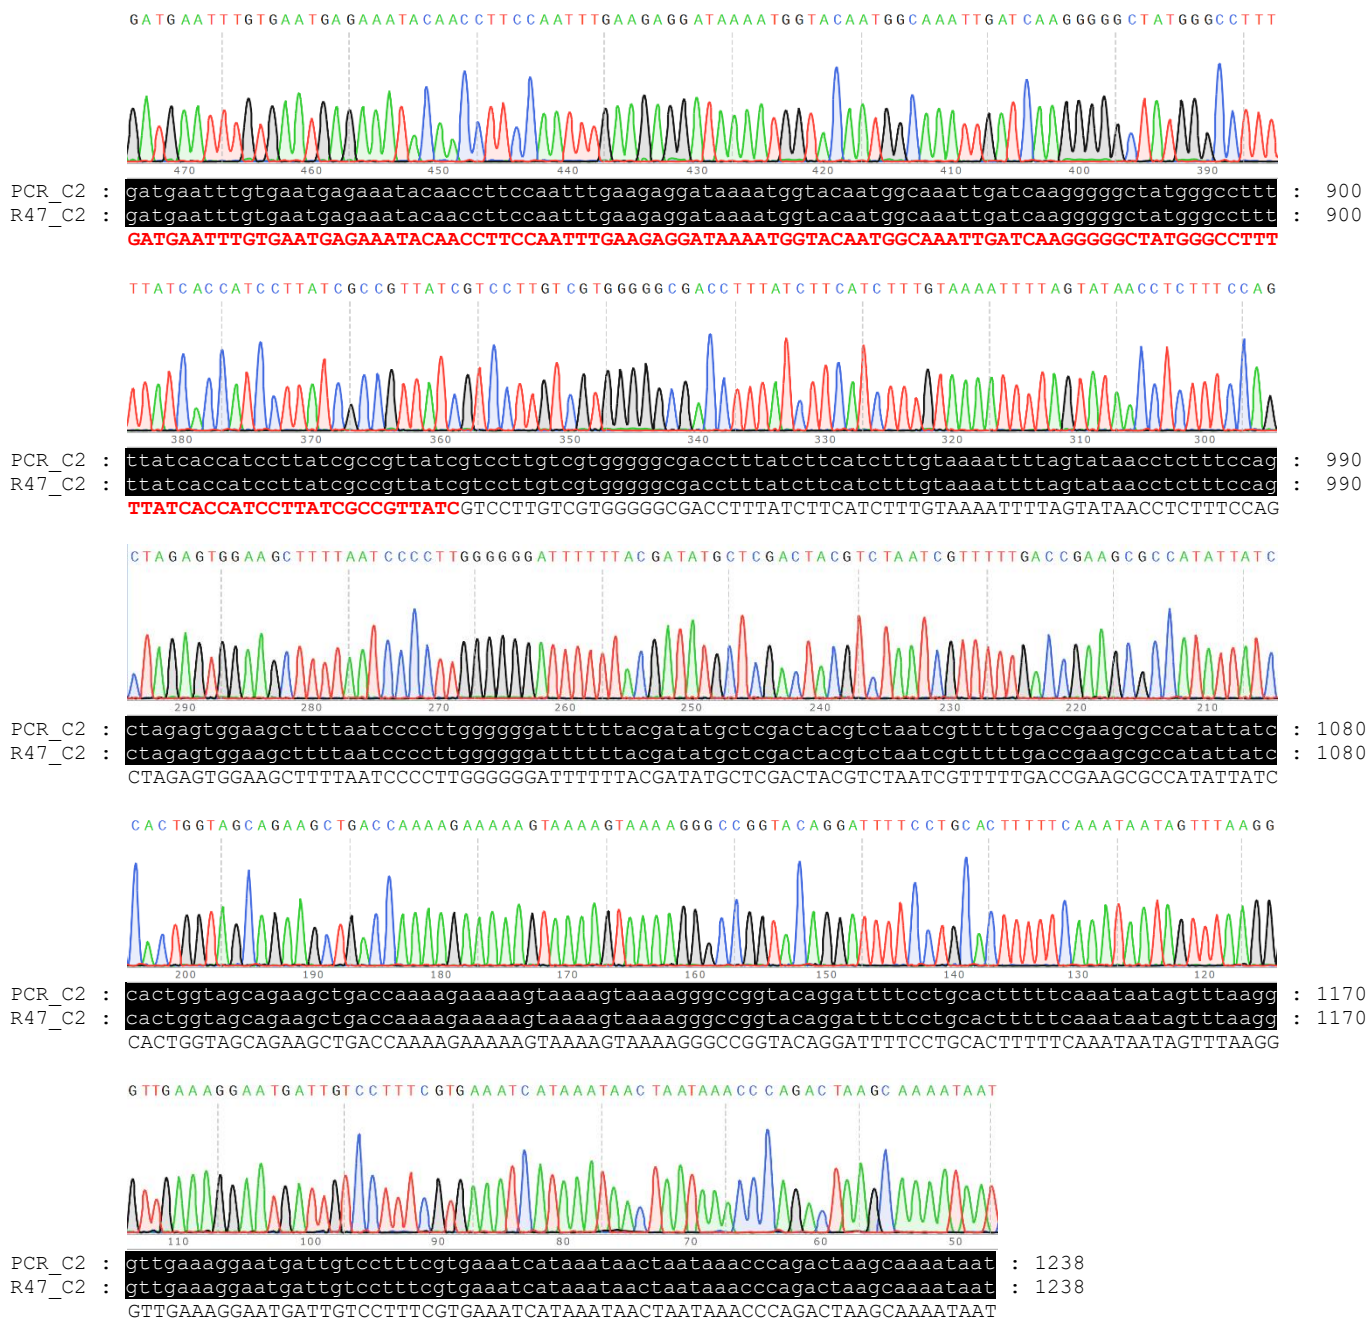

κ comparison of the sequence obtained from PCR amplification and Sanger sequencing (R47-C3) and the expected sequence.

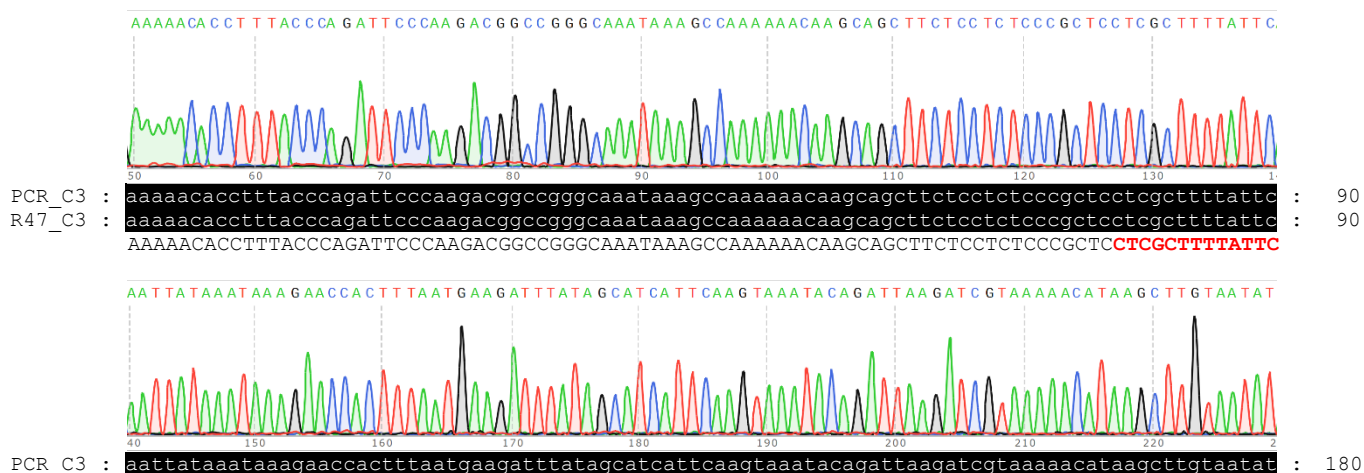

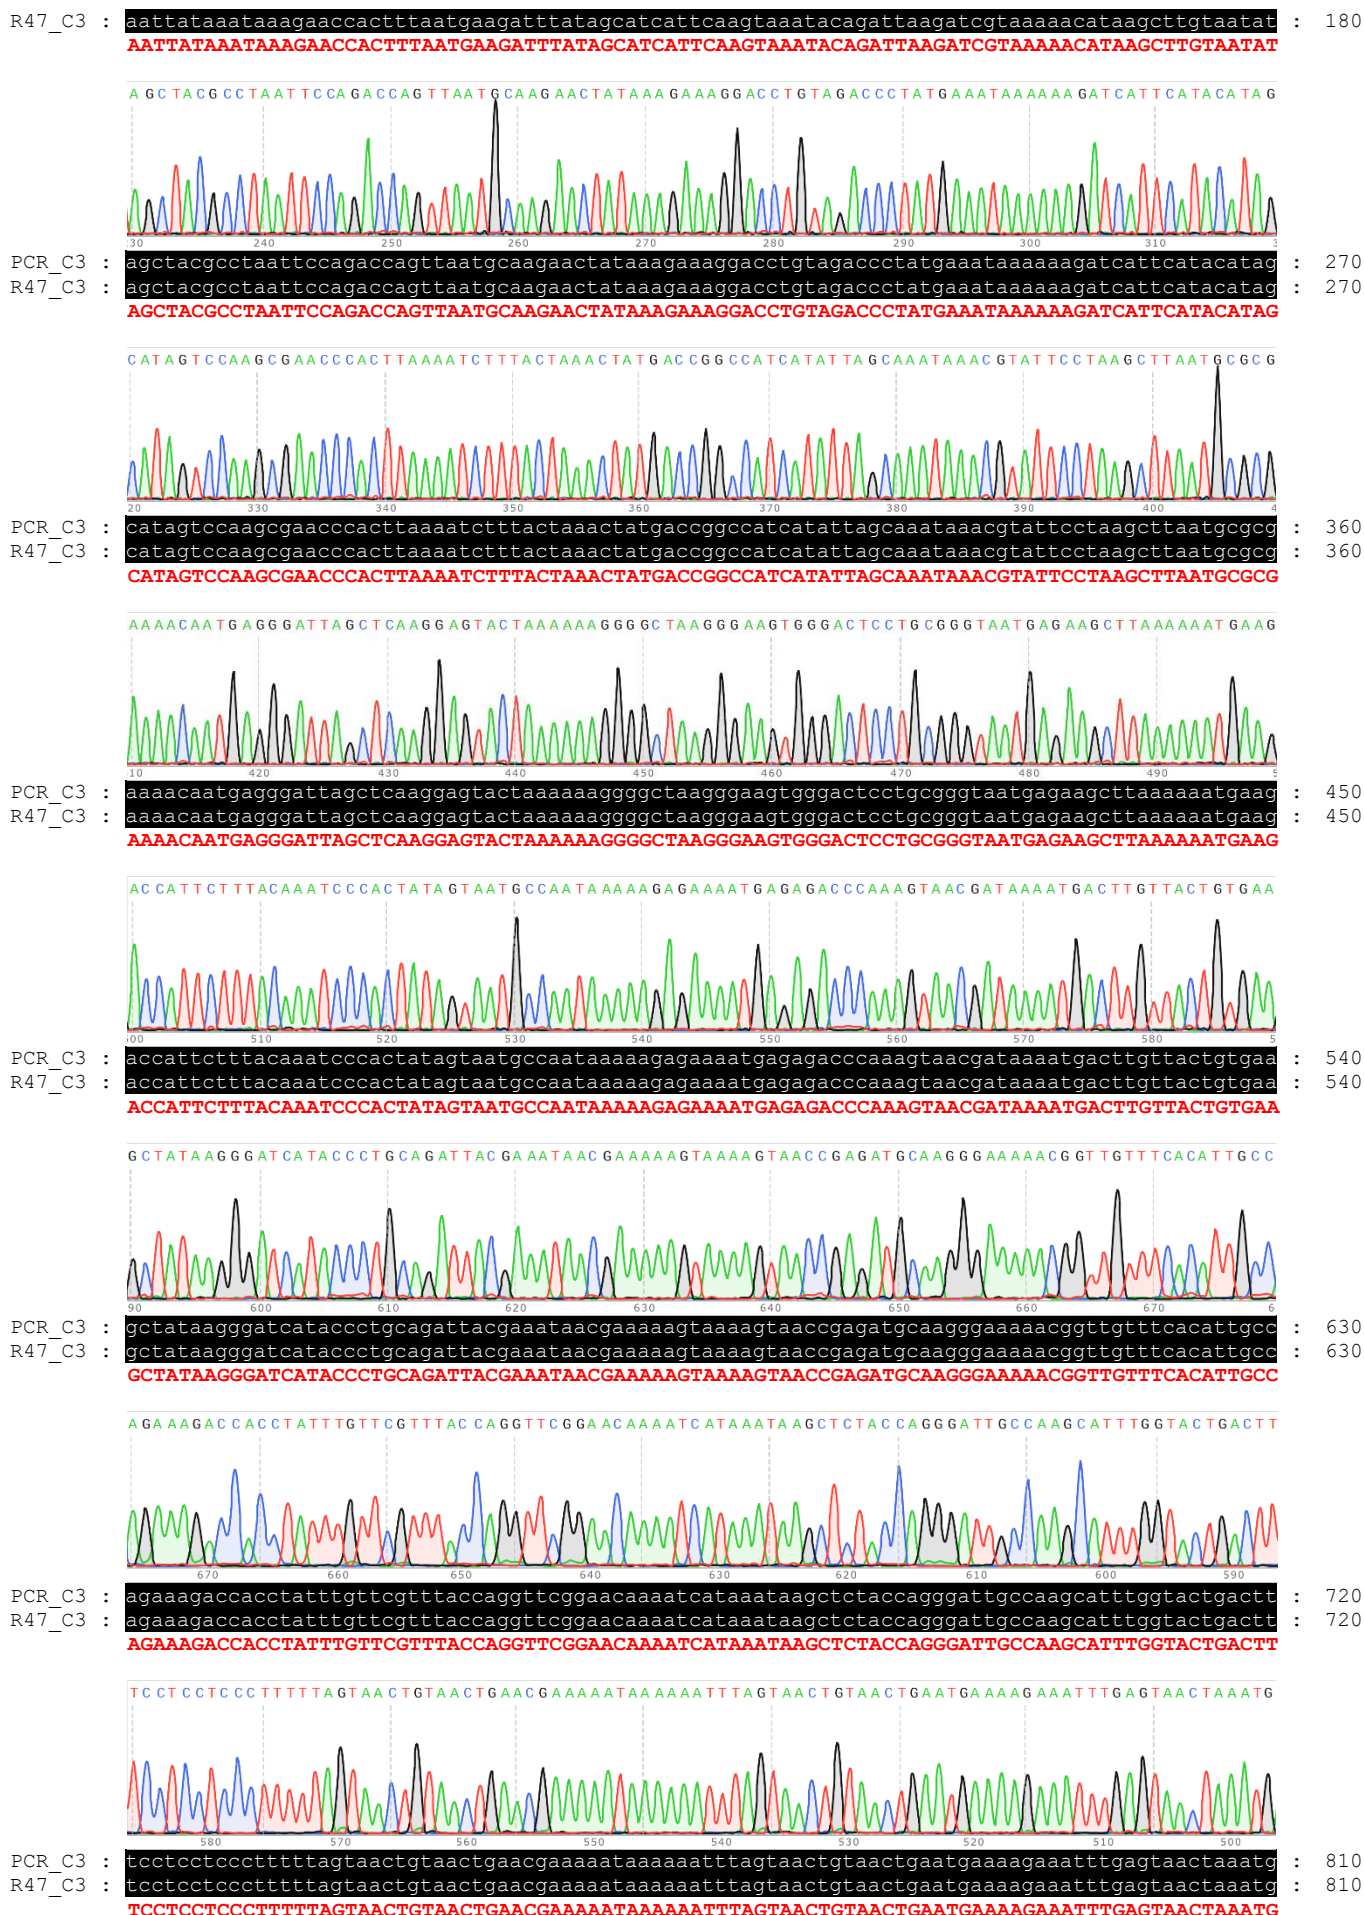

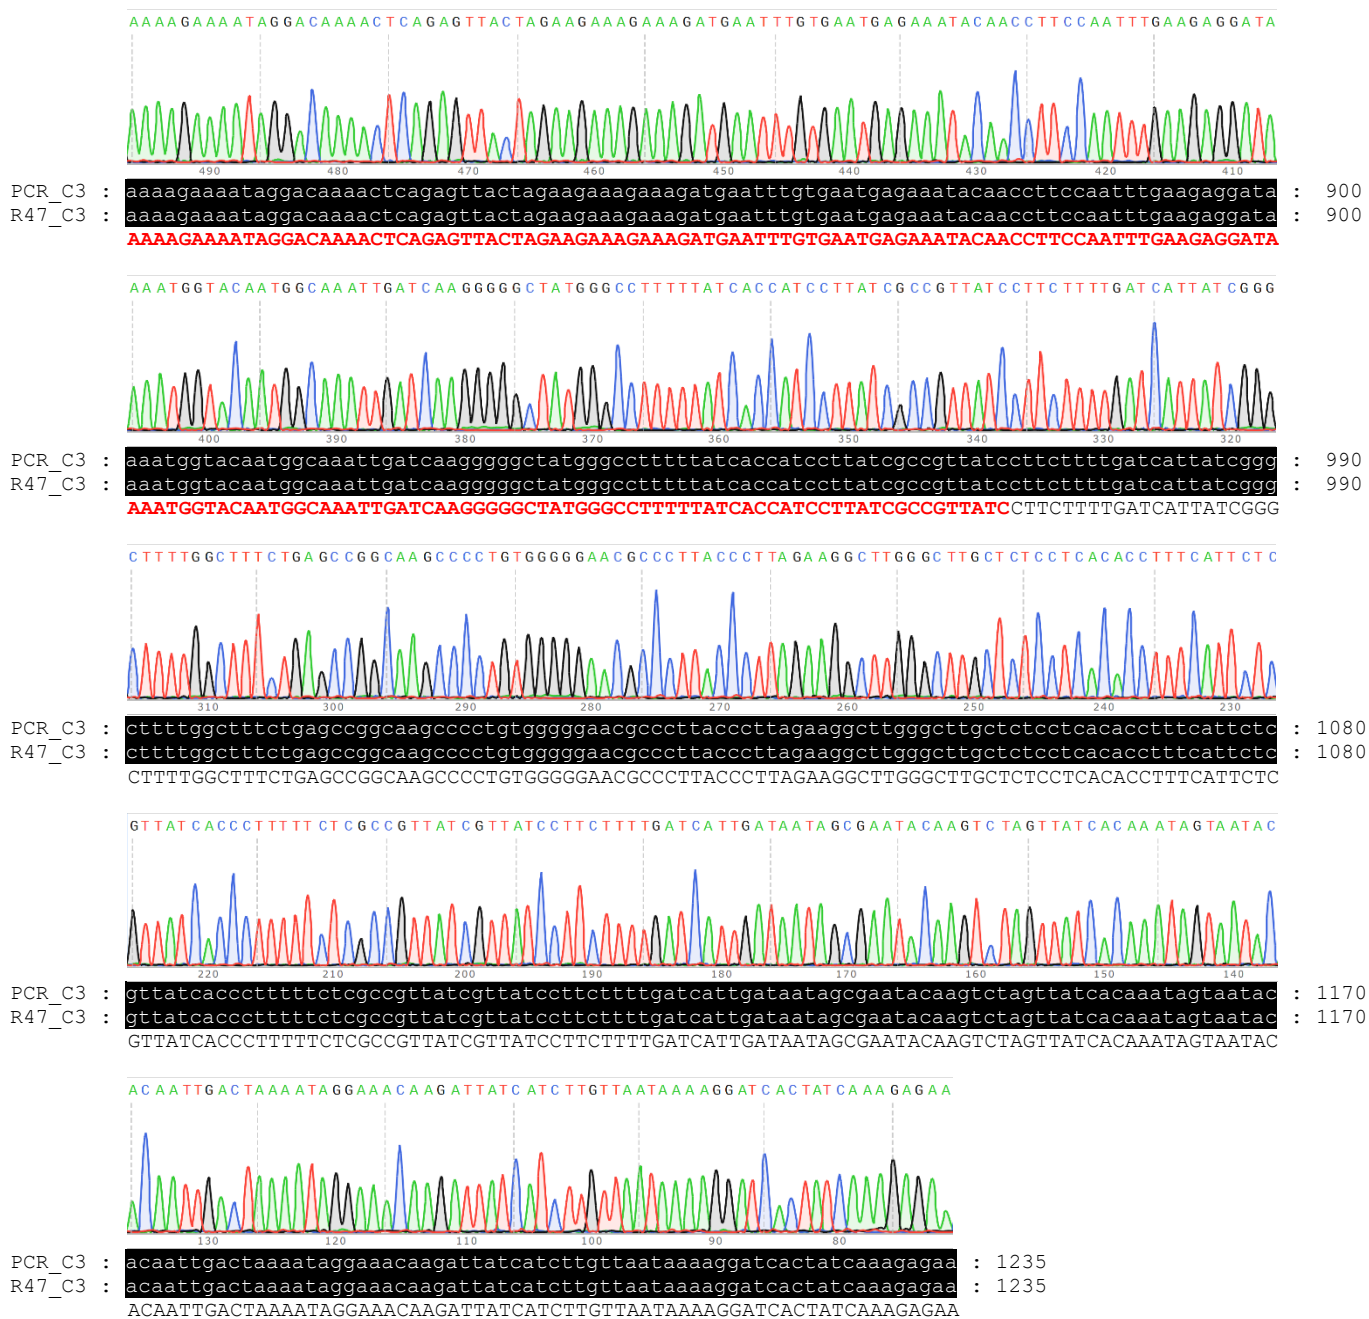

1 comparison of the sequence obtained from PCR amplification and Sanger sequencing (R47-C4) and the expected sequence.

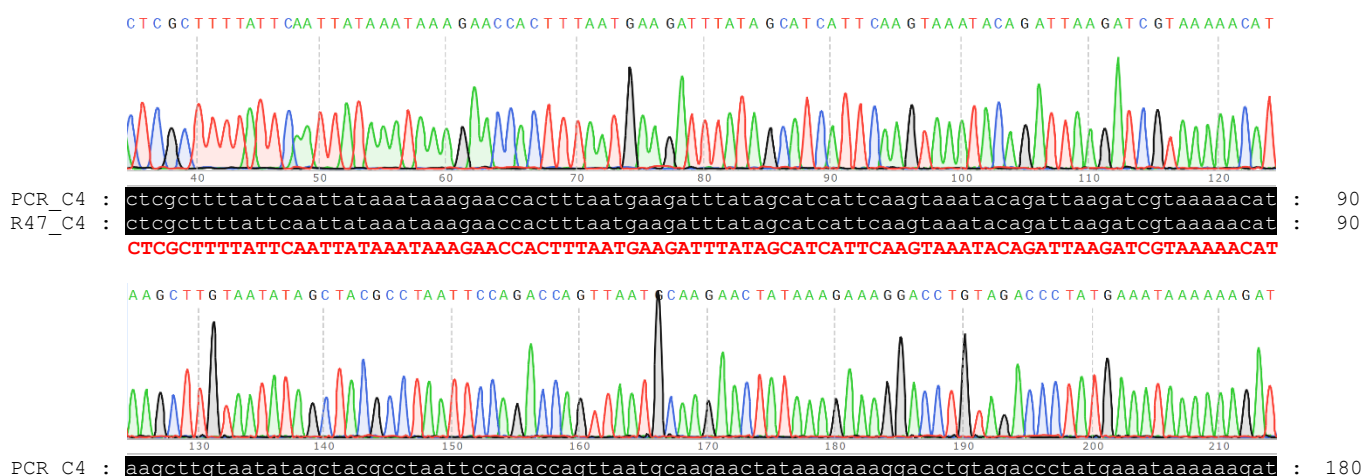

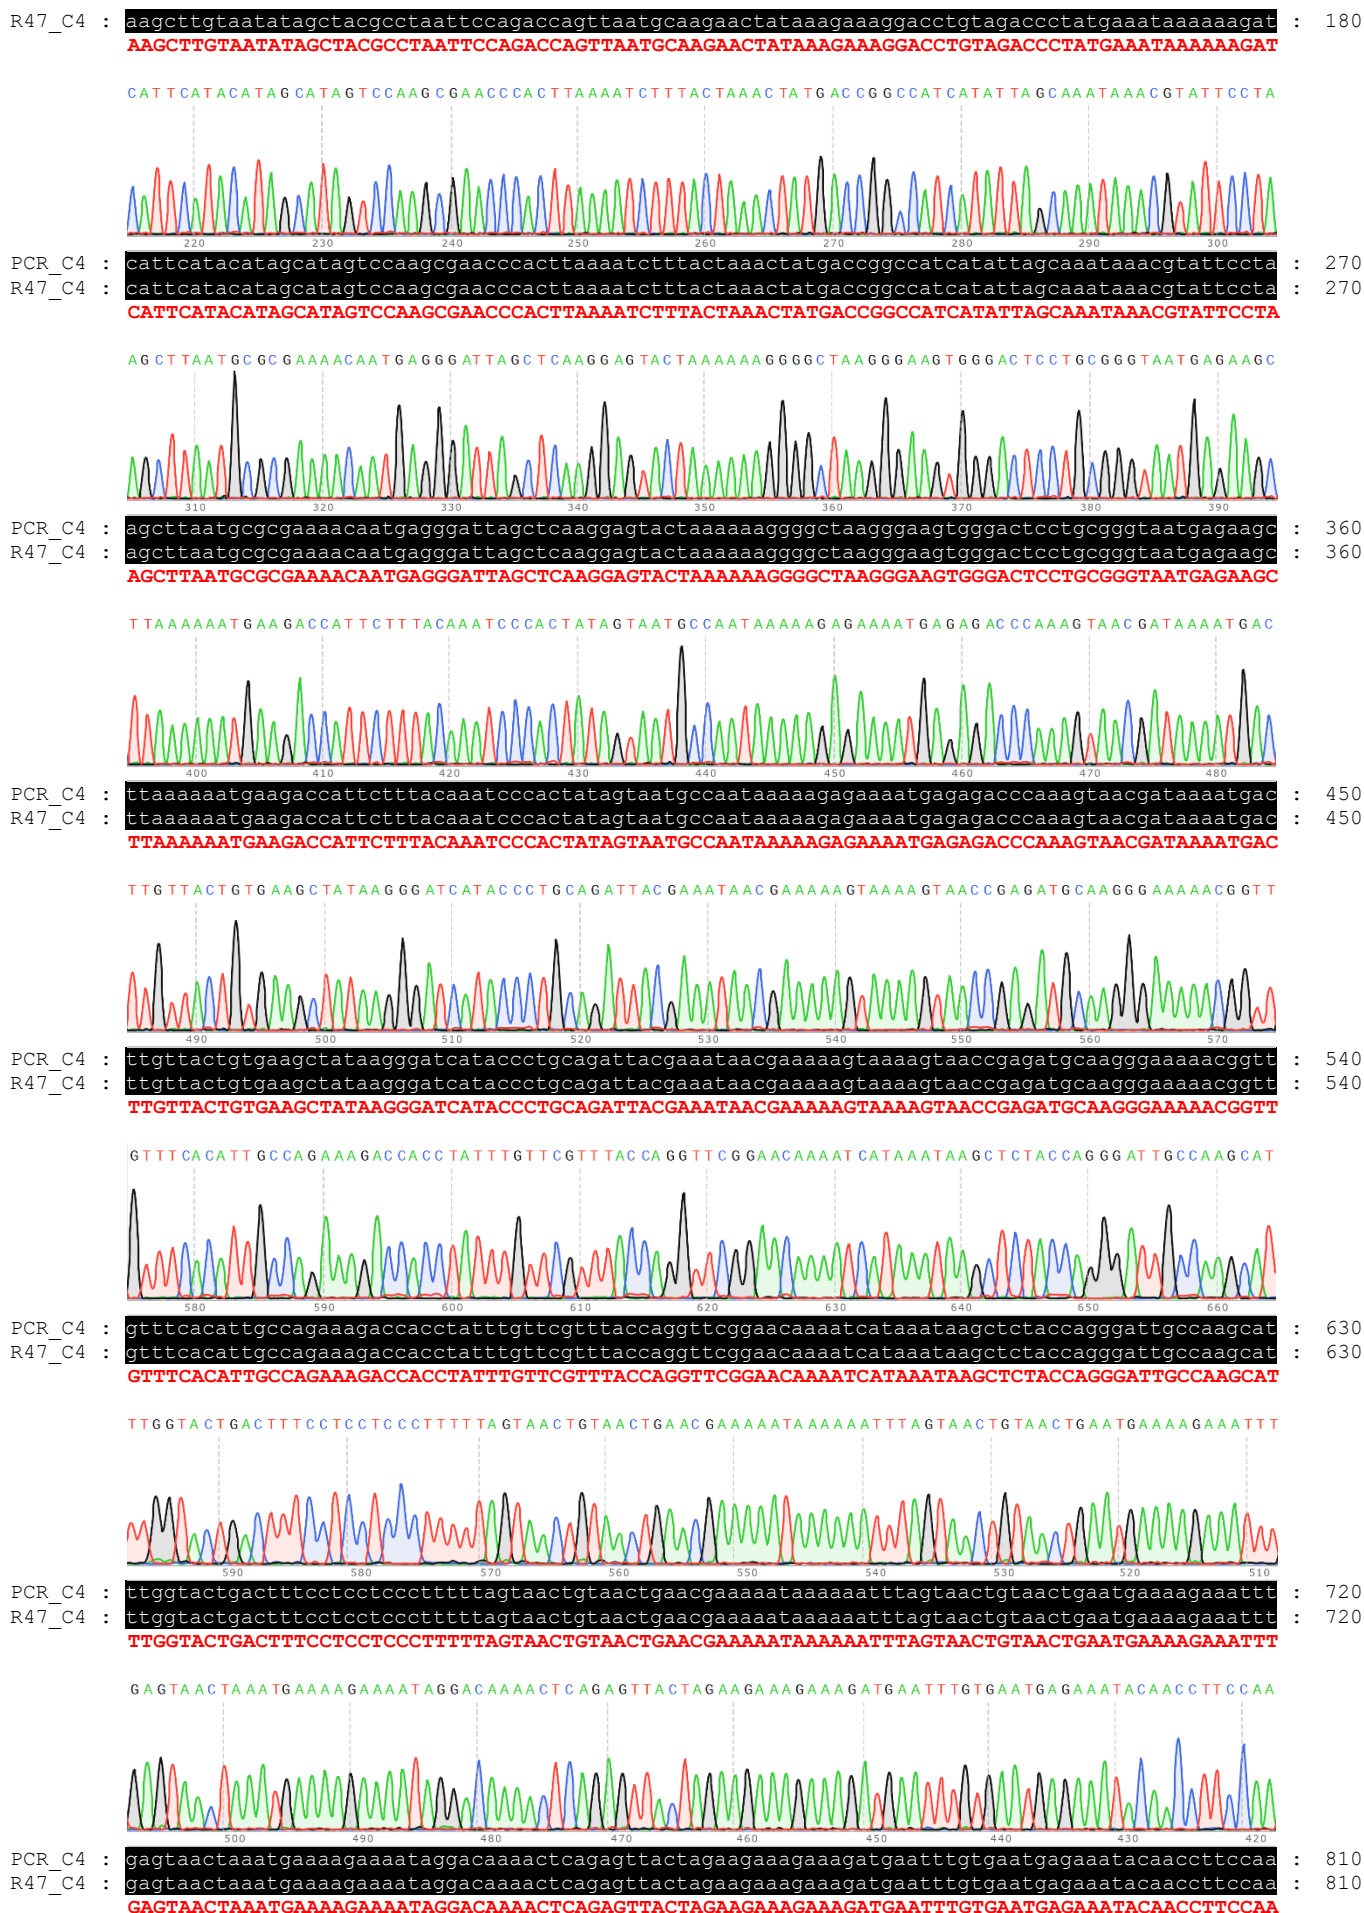



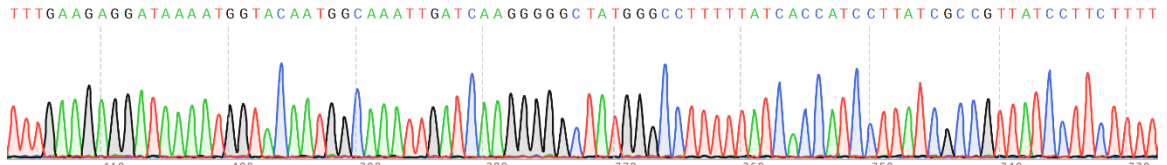

PCR\_C4 : tttgaagaggataaaaatggtacaatggcaaattgatcaagggggctatgggacctttttatcaccatccttategccggttatccttctttt : 900  
 R47\_C4 : tttgaagaggataaaaatggtacaatggcaaattgatcaagggggctatgggacctttttatcaccatccttategccggttatccttctttt : 900  
**TTTGAAGAGGATAAAATGGTACAAATGGCAAATTGATCAAGGGGGCTATGGGCTTTTTATCACCATCCTTATCGCCGTTATCCTTCTTTT**

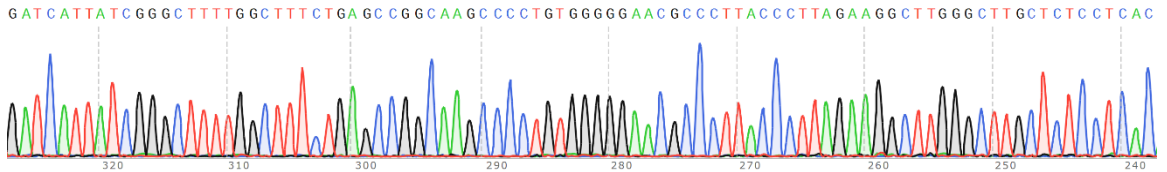

PCR\_C4 : gatcattatcgggcttttggctttctgagccggcaagcccctgtgggggaacgcccttacccttagaaggcttgggcttgctctcctcac : 990  
 R47\_C4 : gatcattatcgggcttttggctttctgagccggcaagcccctgtgggggaacgcccttacccttagaaggcttgggcttgctctcctcac : 990  
 GATCATTATCGGGCTTTTGGCTTTCTGAGCCGGCAAGCCCCTGTGGGGGAACGCCCTTACCCTTAGAAGGCTTGGGCTTGCTCTCCTCAC

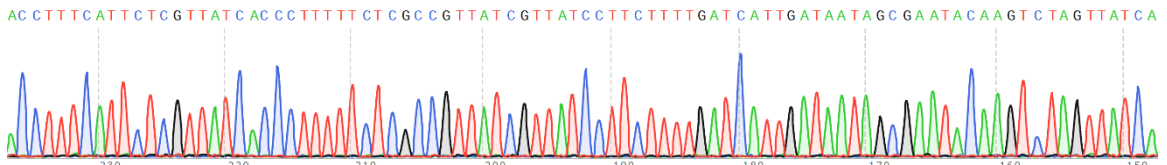

PCR\_C4 : acctttcattctcgttatcacctttttctcgccggttatcgttatccttcttttgatcattgataatagcgaataacaagtctagttatca : 1080  
 R47\_C4 : acctttcattctcgttatcacctttttctcgccggttatcgttatccttcttttgatcattgataatagcgaataacaagtctagttatca : 1080  
 ACCTTTCATTCTCGTTATCACCTTTTTCTCGCCGTTATCGTTATCCTTCTTTTGATCATTGATAATAGCGAATACAAGTCTAGTTATCA



Figure S5 Alignment of the Nanopore long reads to the MTPTs and their flanking sequences in the mitogenome of *S. officinalis*. Panels a-w show the alignment of the Nanopore long reads to the 21 MTPT sequences on MC1 (mtpt01 to mtpt21) and 2 MTPT sequences on MC2 (mtpt22 to mtpt23). The figures were generated using IGV. The MTPT sequence was shown on the top of each figure with its coordinates. The coverage depth was shown with a blue bar chart. The reads were represented with gray lines. The regions in gray represent a match. The purple regions represent small indels. Regions shown with other colors represent mismatched bases. The MTPT sequences are indicated with red lines that have arrowheads at each end. The flanking sequences that are 2000 bp long are indicated with red lines without arrowheads.

a alignment of Nanopore long reads to mtpt01 and its flanking sequences.

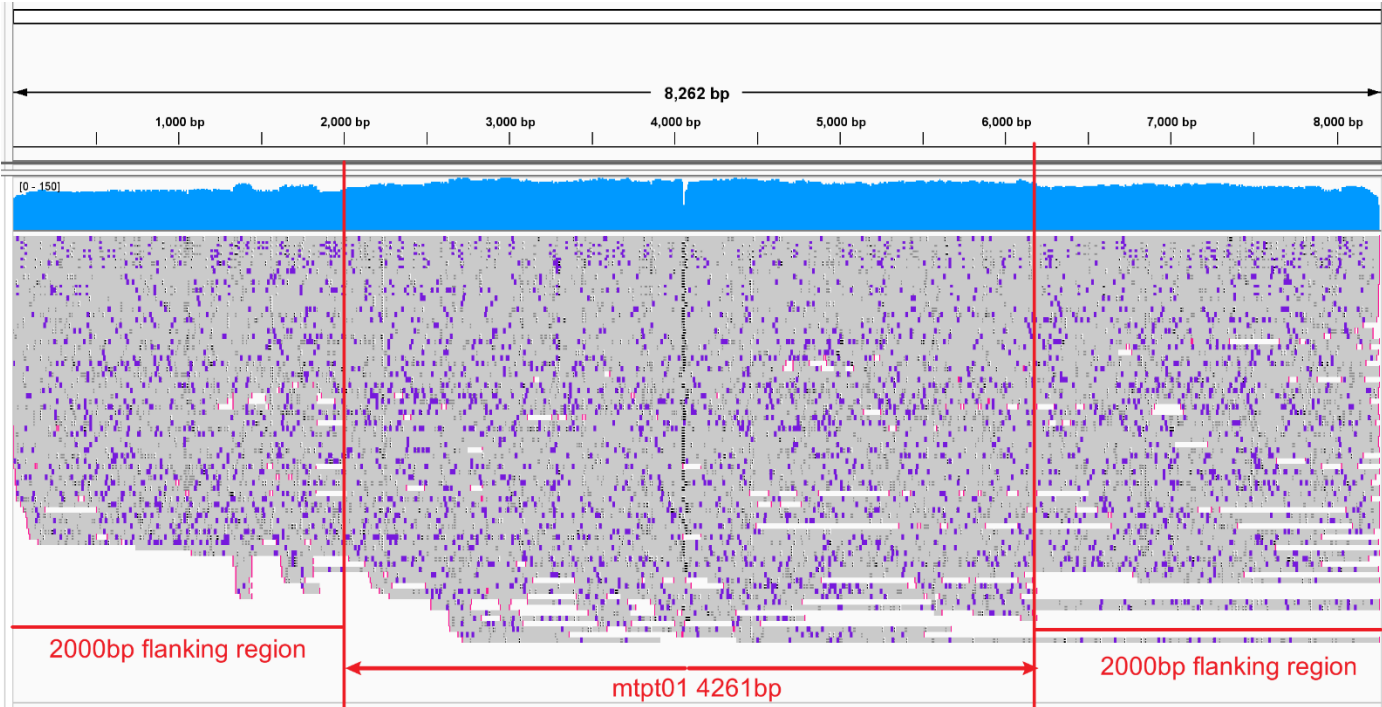

b alignment of Nanopore long reads to mtpt02 and its flanking sequences.

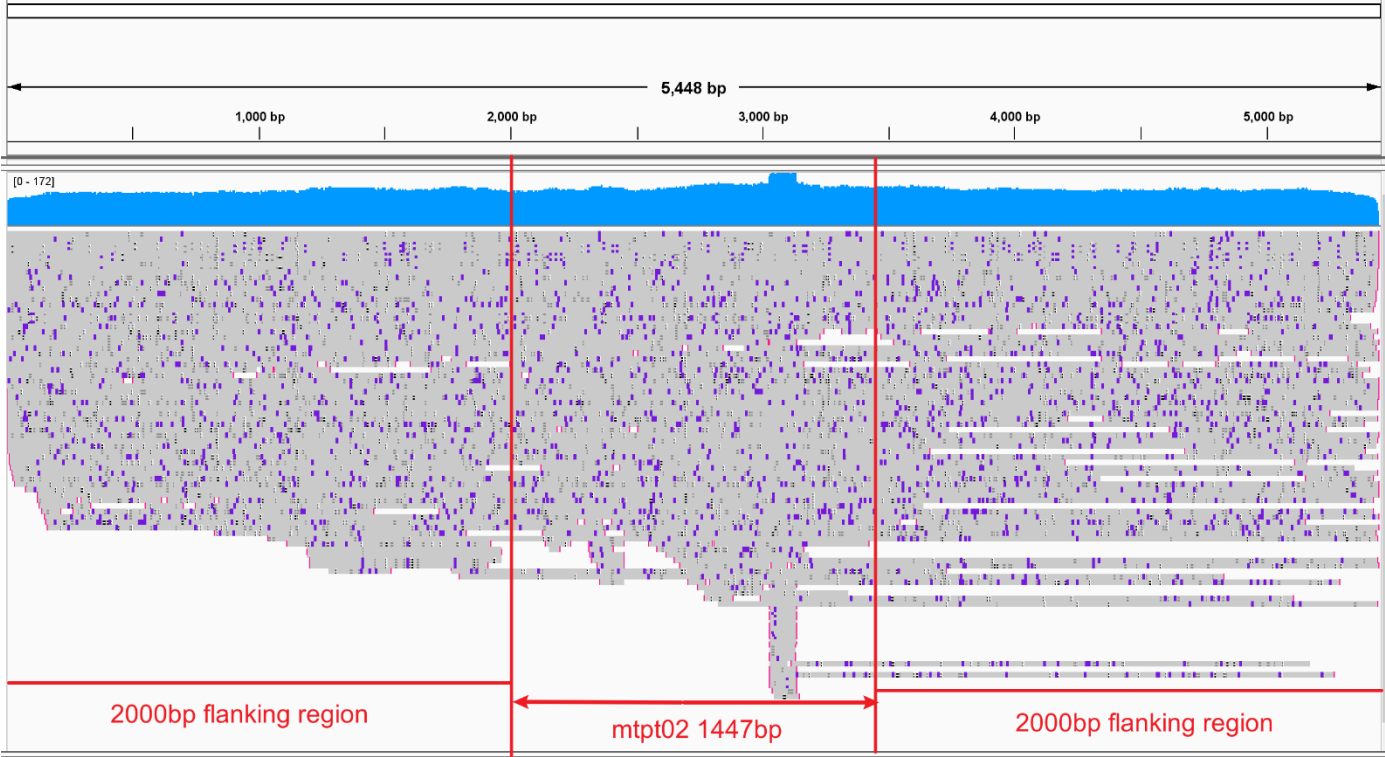



c alignment of Nanopore long reads to mtpt03 and its flanking sequences.

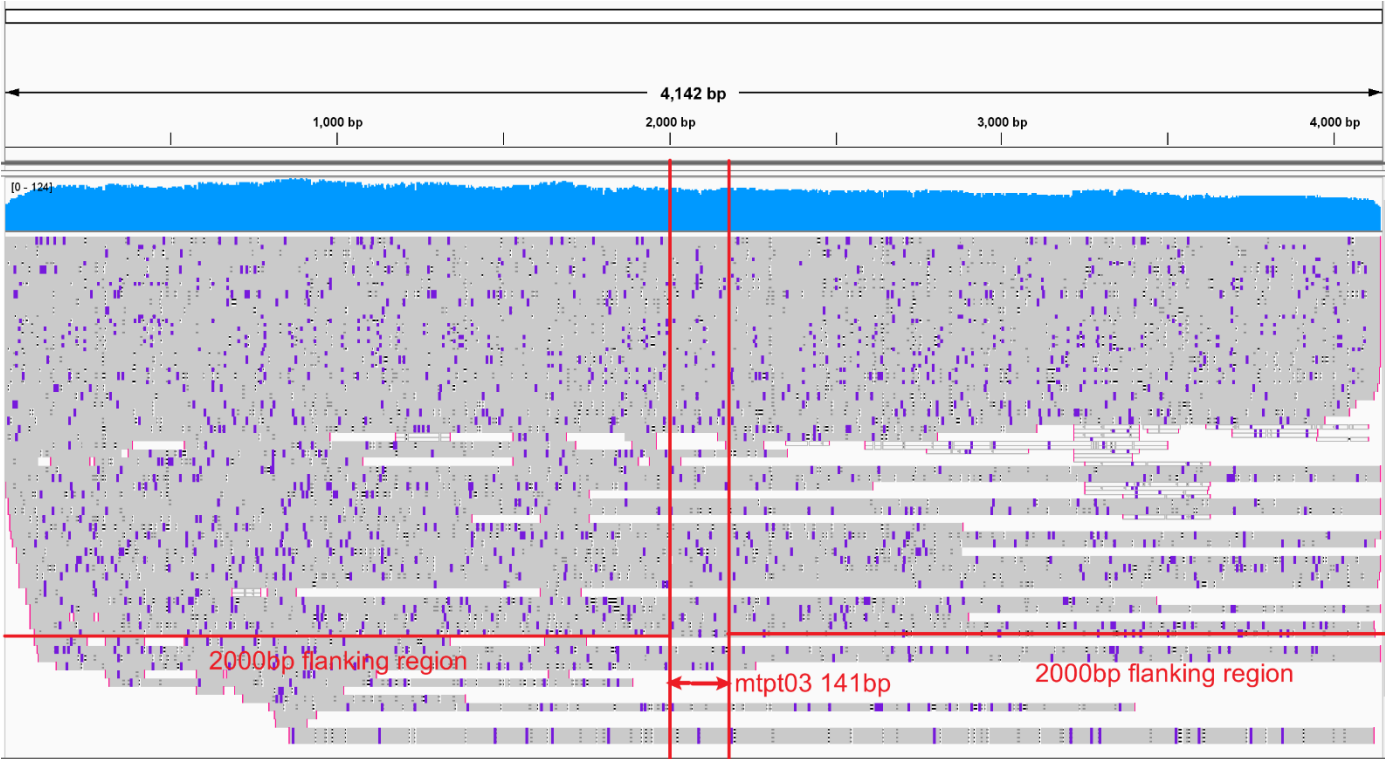

d alignment of Nanopore long reads to mtpt04 and its flanking sequences.

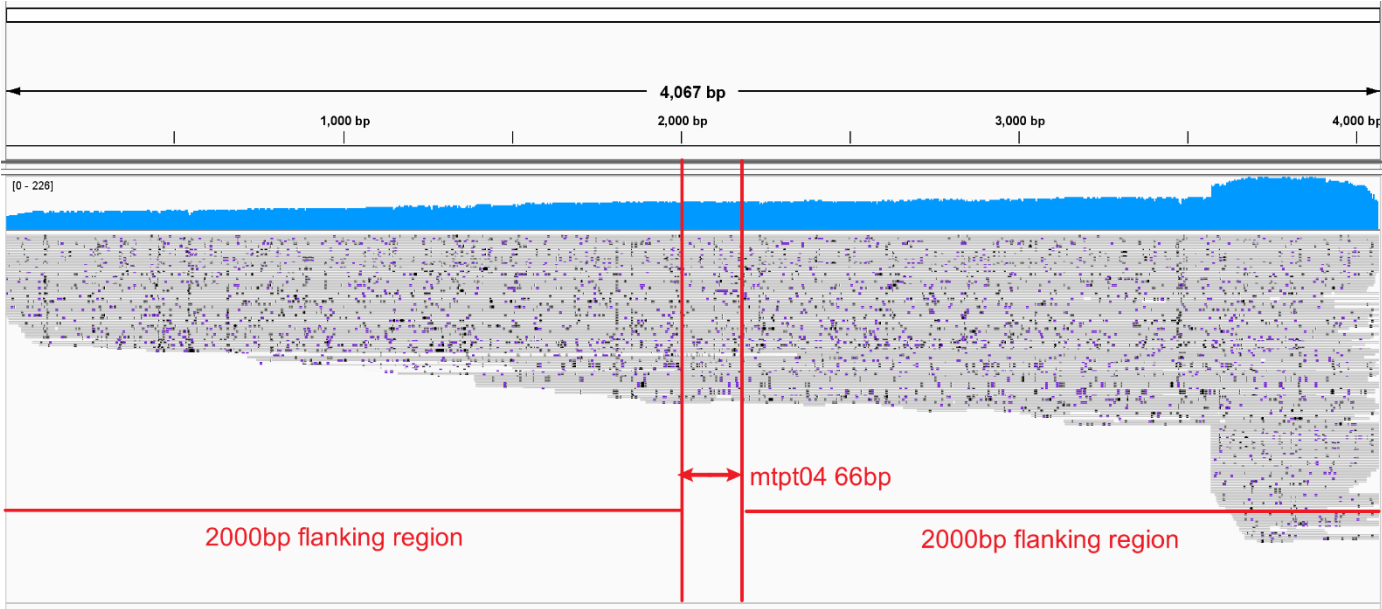

e alignment of Nanopore long reads to mtp05 and its flanking sequences.

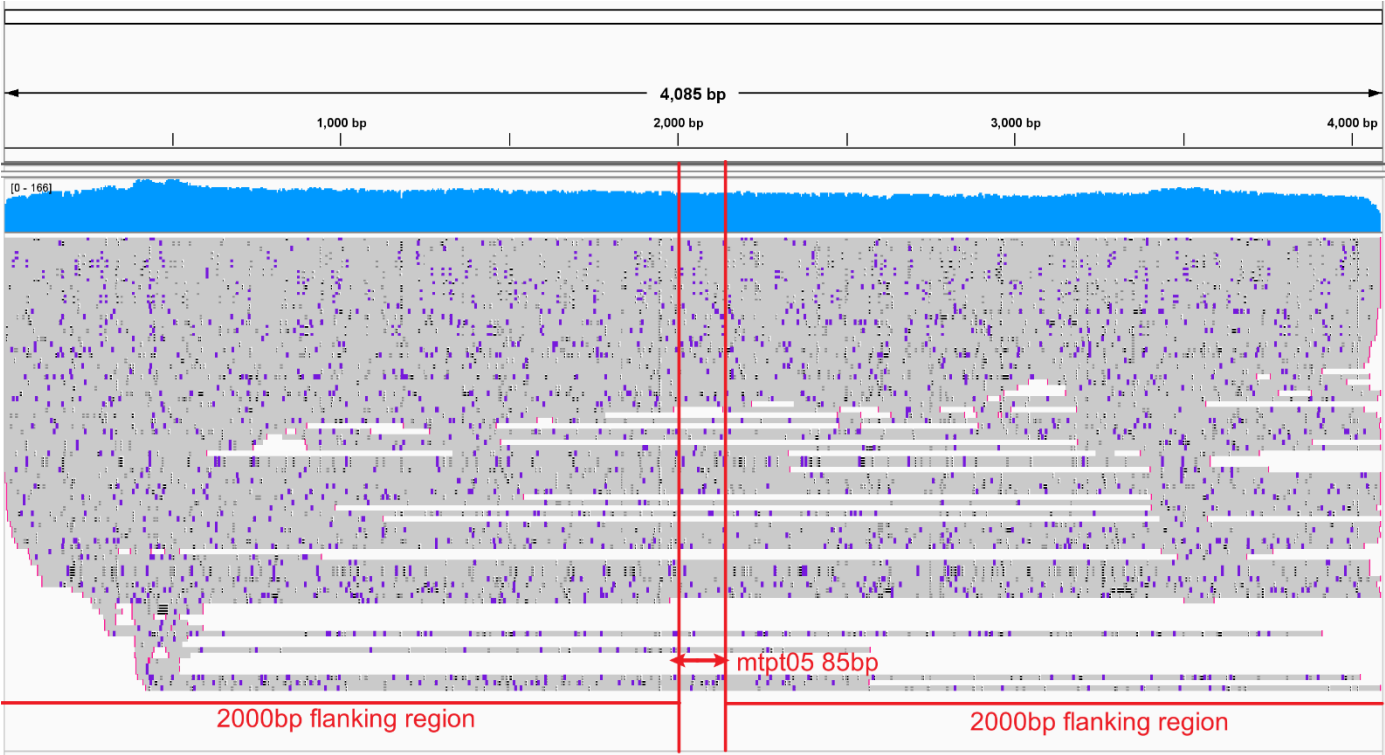

f alignment of Nanopore long reads to mtpt06 and its flanking sequences.

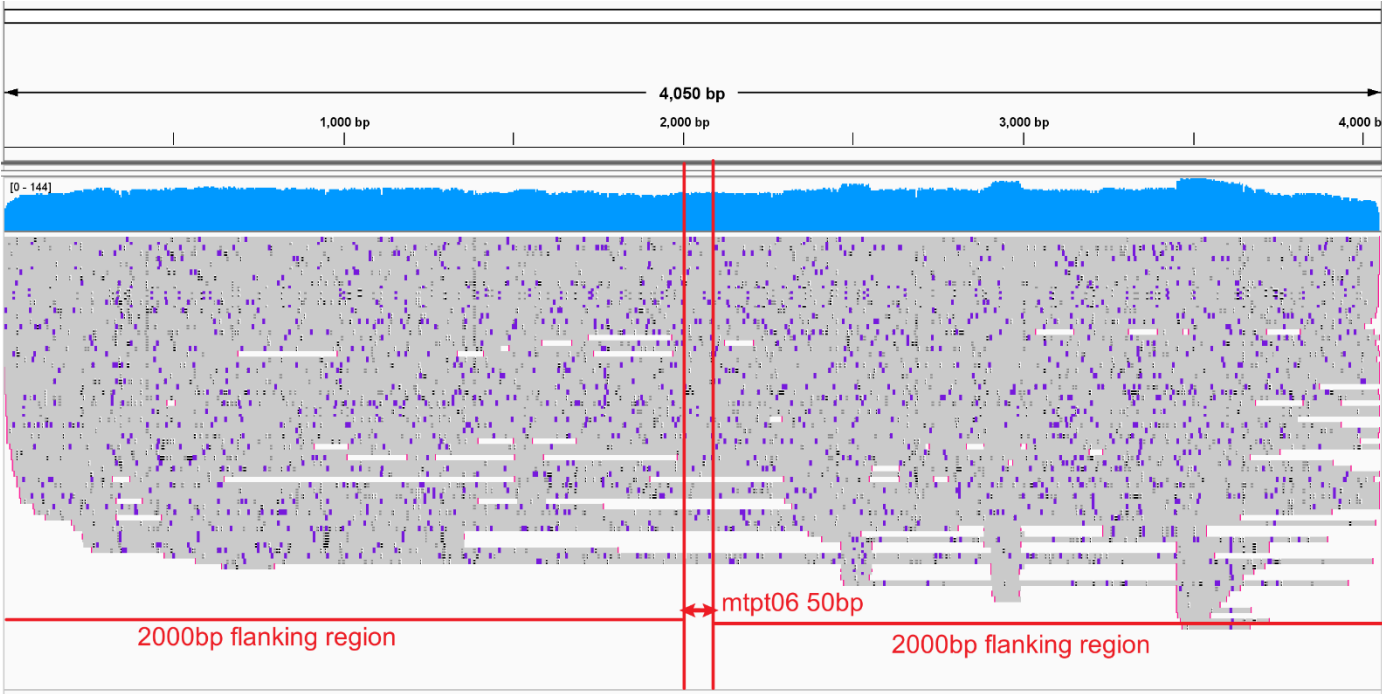

g alignment of Nanopore long reads to mtpt07 and its flanking sequences.

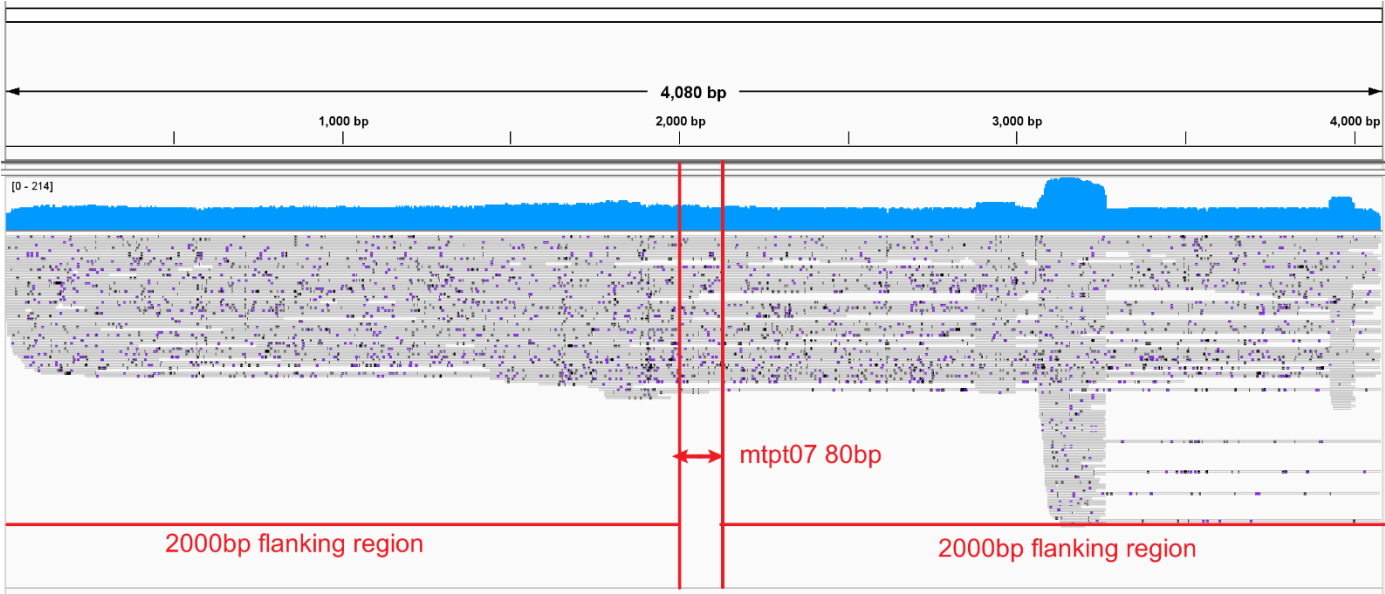

h alignment of Nanopore long reads to mtpt08 and its flanking sequences.

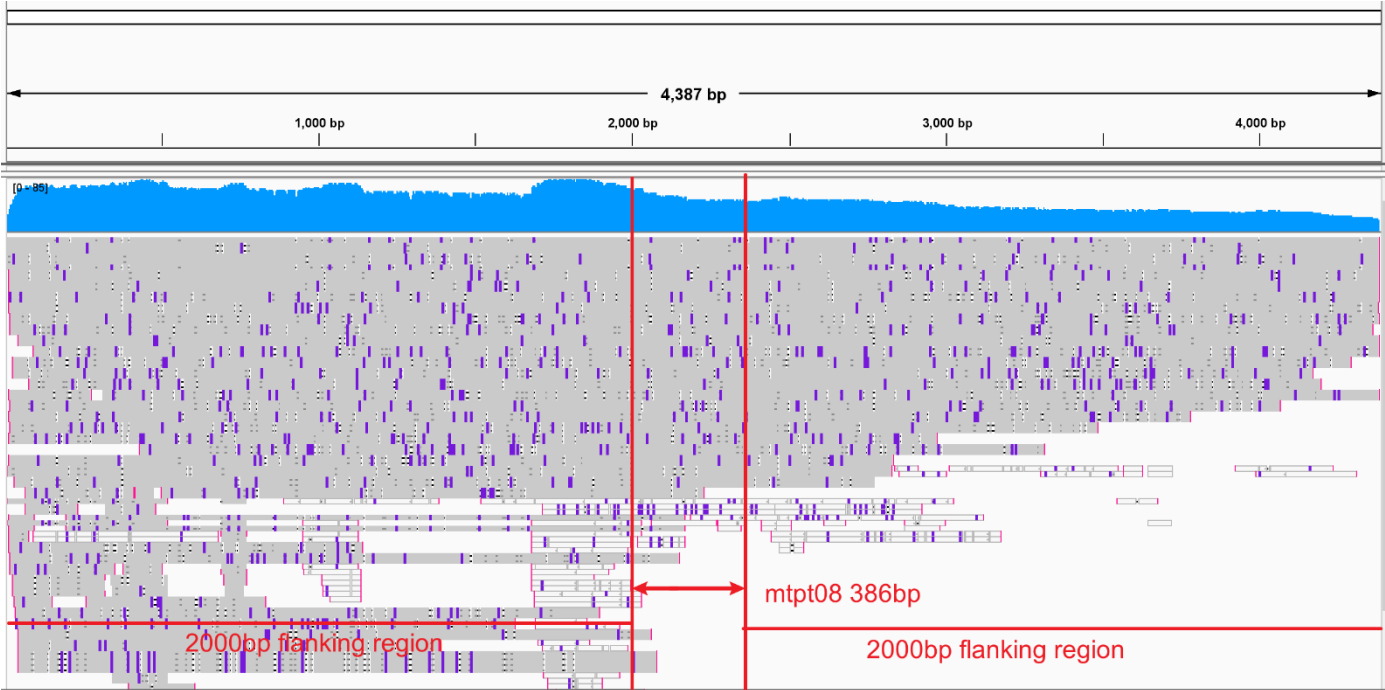

i alignment of Nanopore long reads to mtpt09 and its flanking sequences.

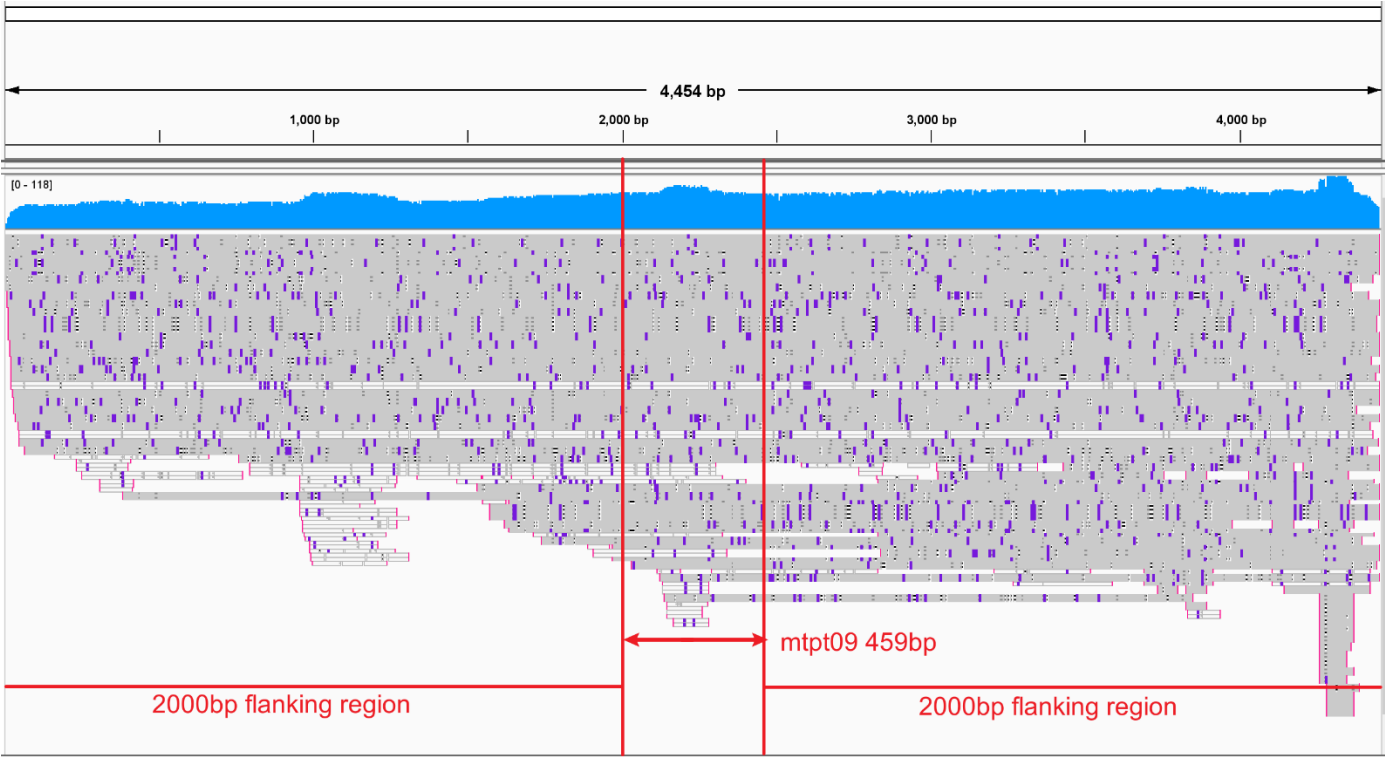

j alignment of Nanopore long reads to mtp10 and its flanking sequences.

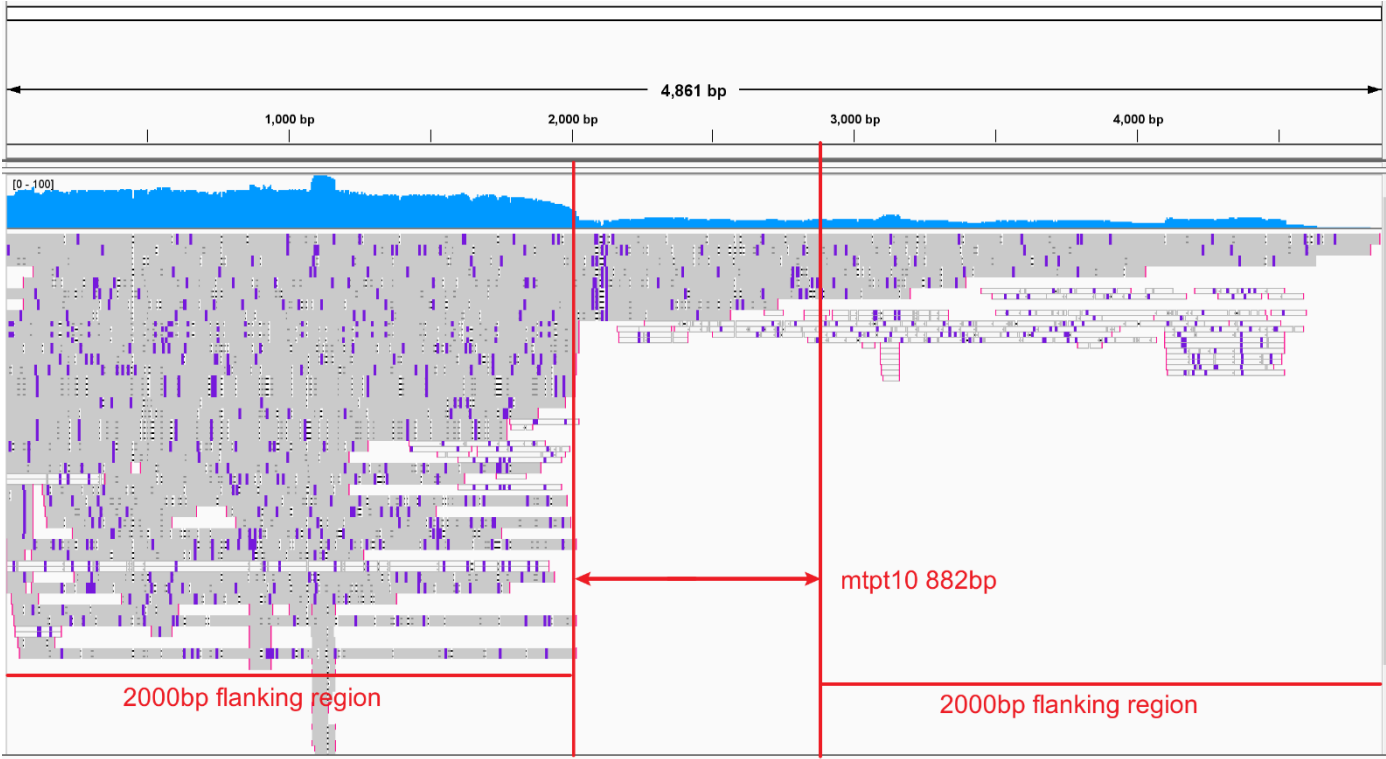



k alignment of Nanopore long reads to mtpt11 and its flanking sequences.

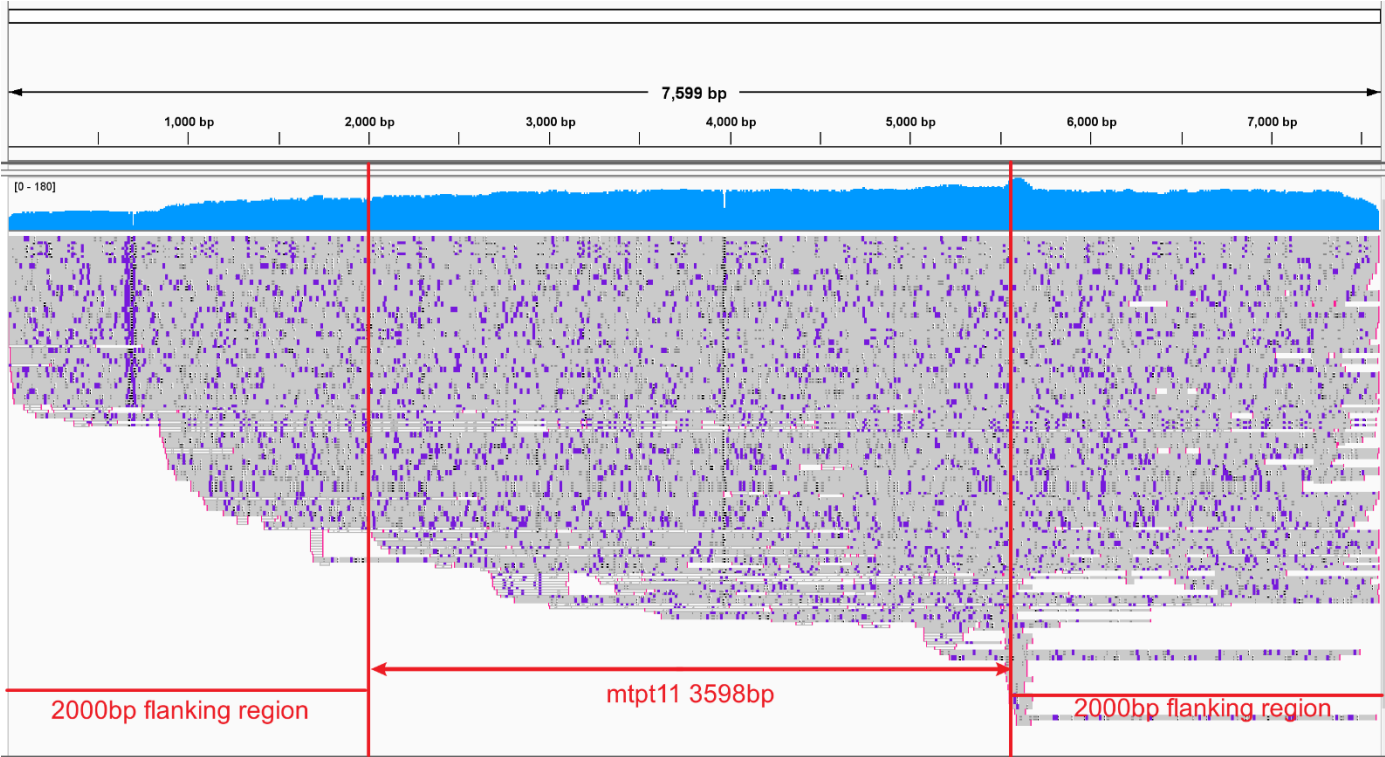

I alignment of Nanopore long reads to mtpt12 and its flanking sequences.

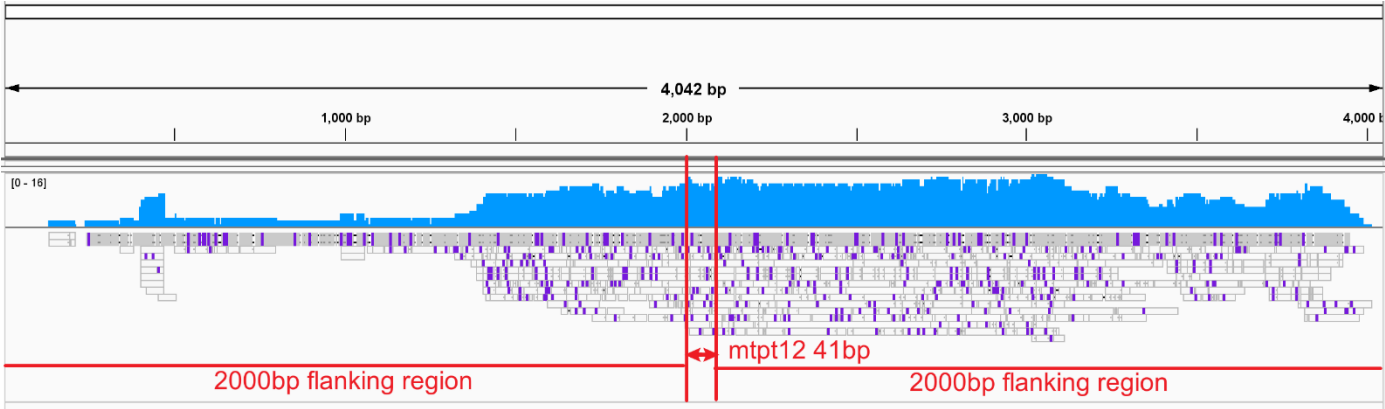

m alignment of Nanopore long reads to mtpt13 and its flanking sequences.

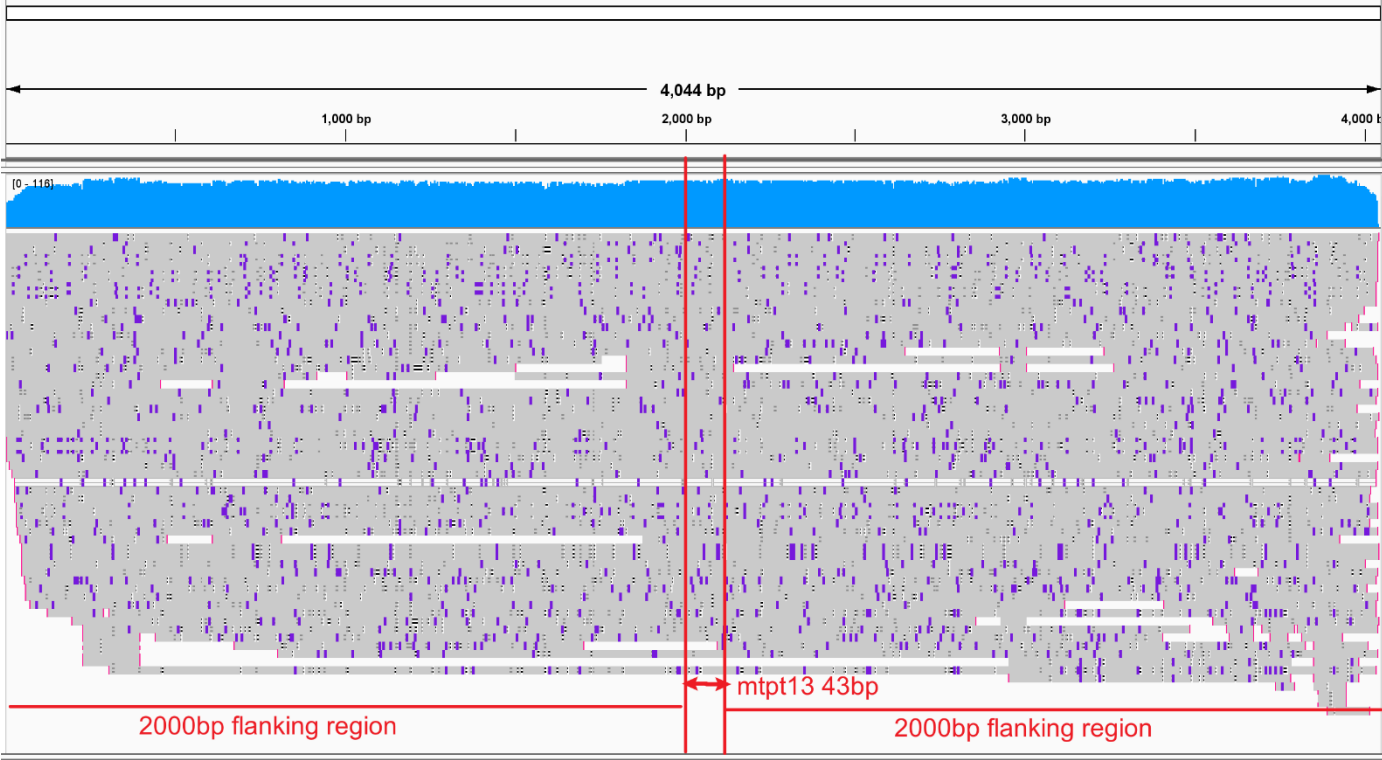

n alignment of Nanopore long reads to mtpt14 and its flanking sequences.

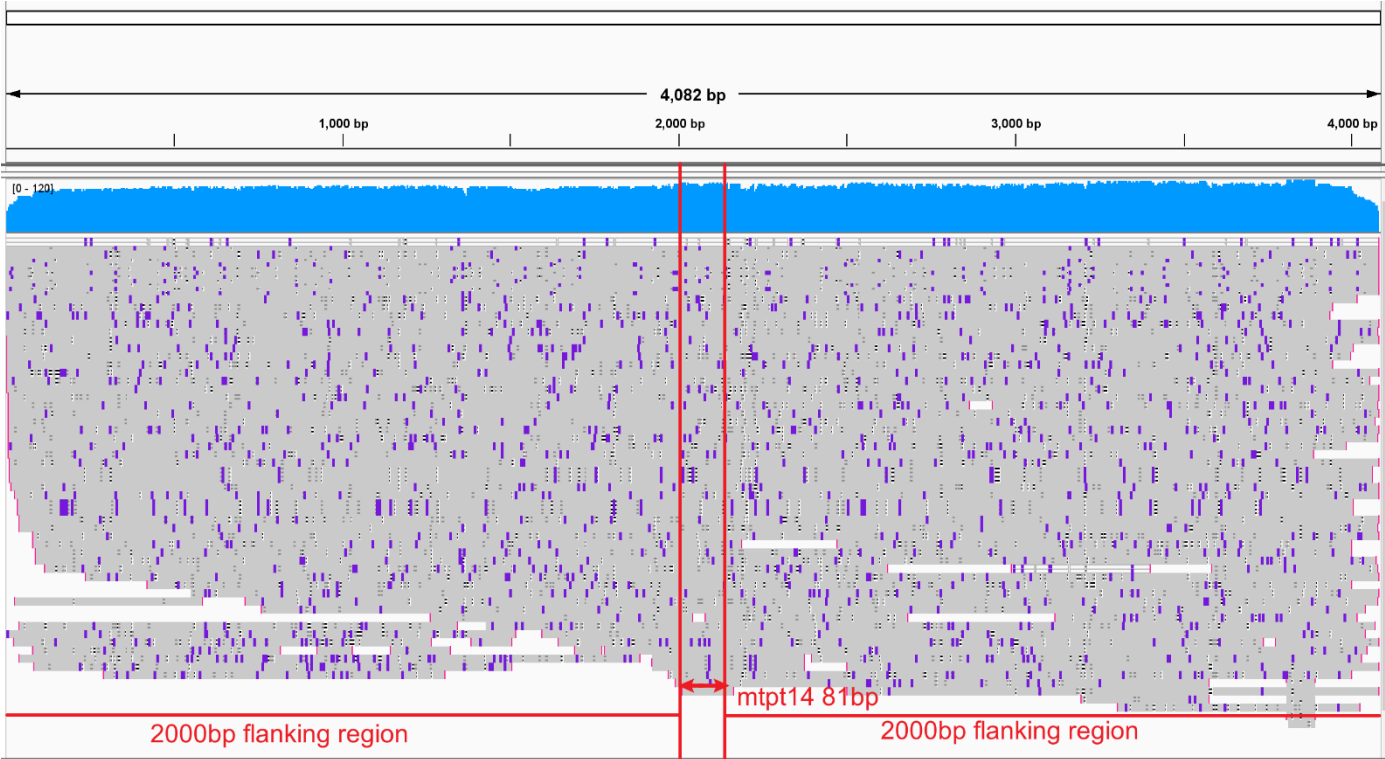

o alignment of Nanopore long reads to mtp15 and its flanking sequences.

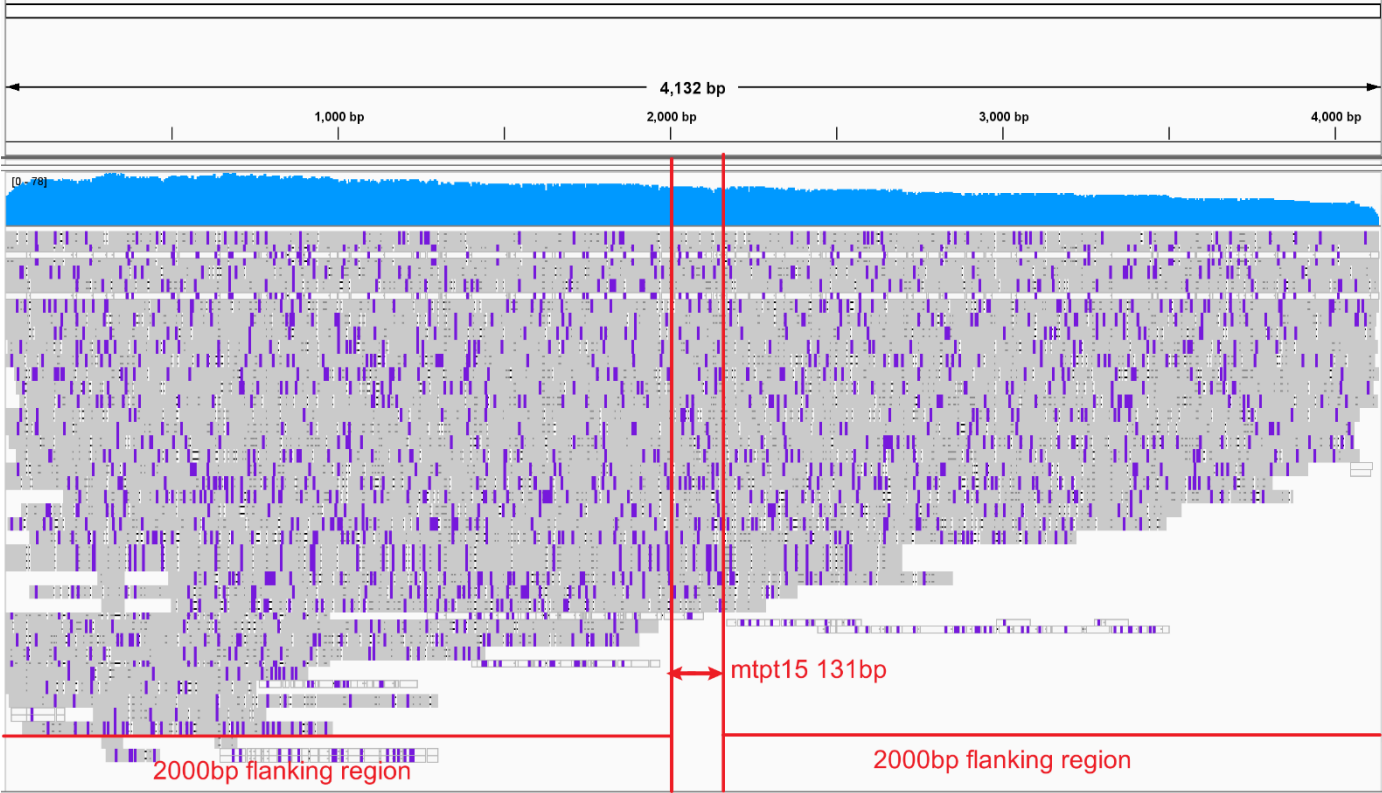

p alignment of Nanopore long reads to mtpt16 and its flanking sequences.

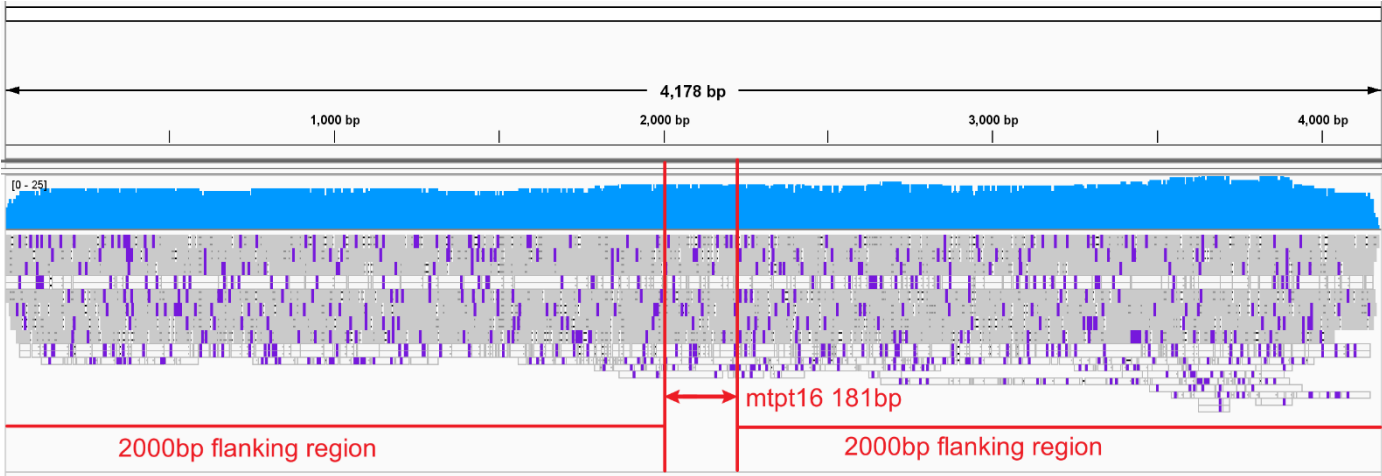

q alignment of Nanopore long reads to mtpt17 and its flanking sequences.

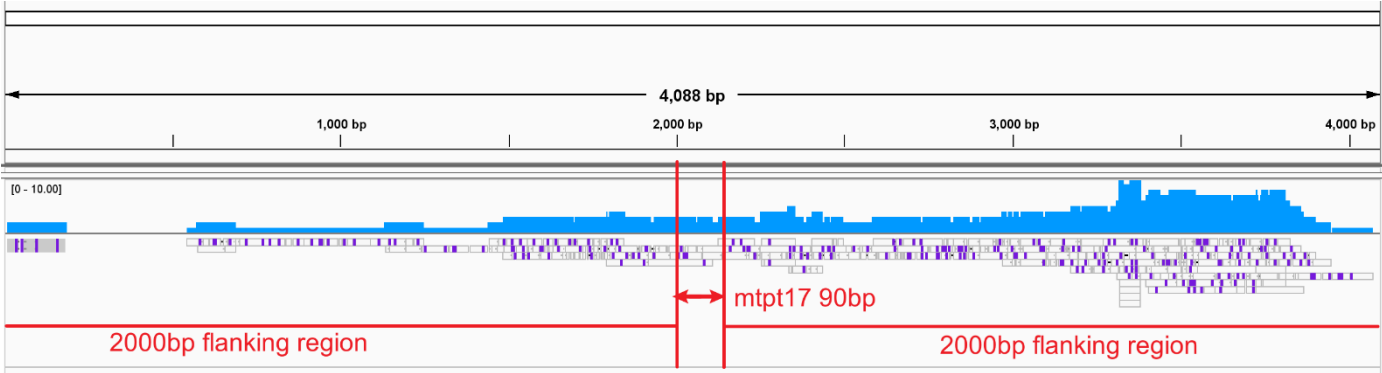

r alignment of Nanopore long reads to mtpt18 and its flanking sequences.

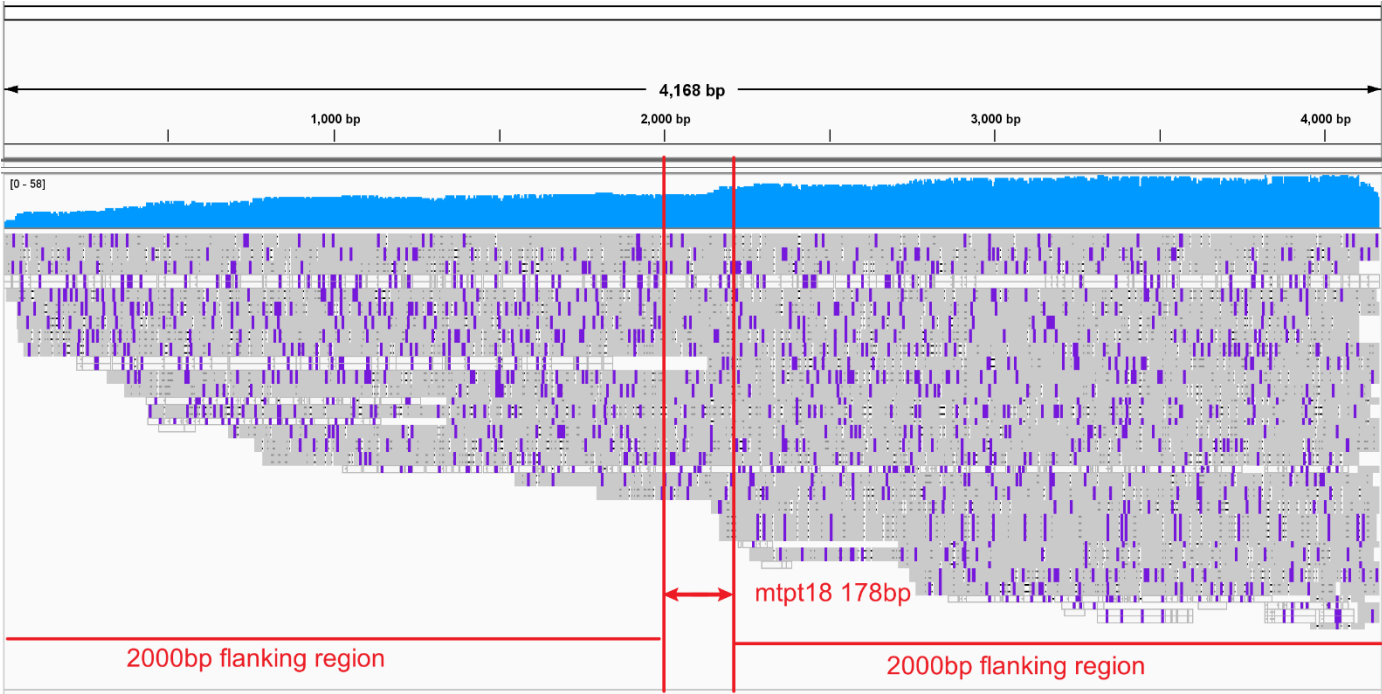



s alignment of Nanopore long reads to mtpt19 and its flanking sequences.

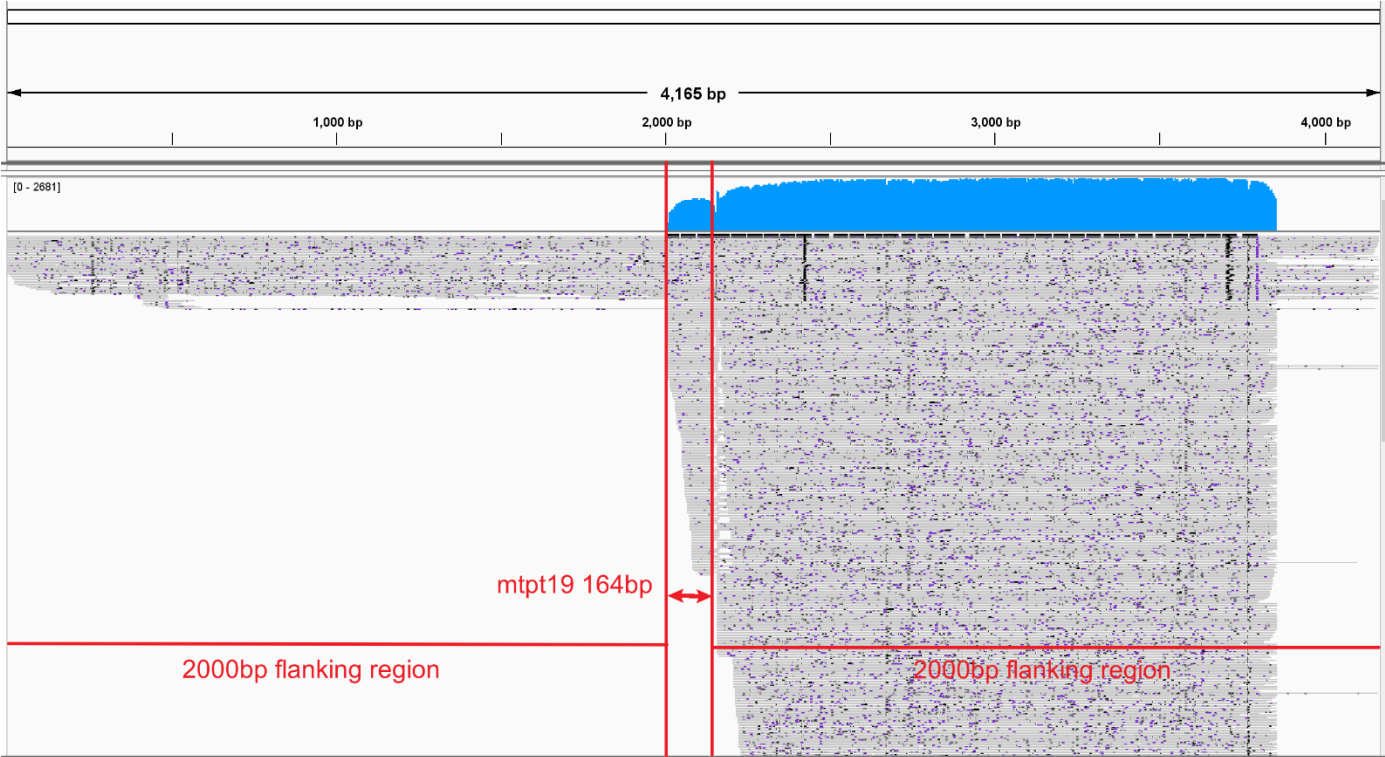

t alignment of Nanopore long reads to mtpt20 and its flanking sequences.

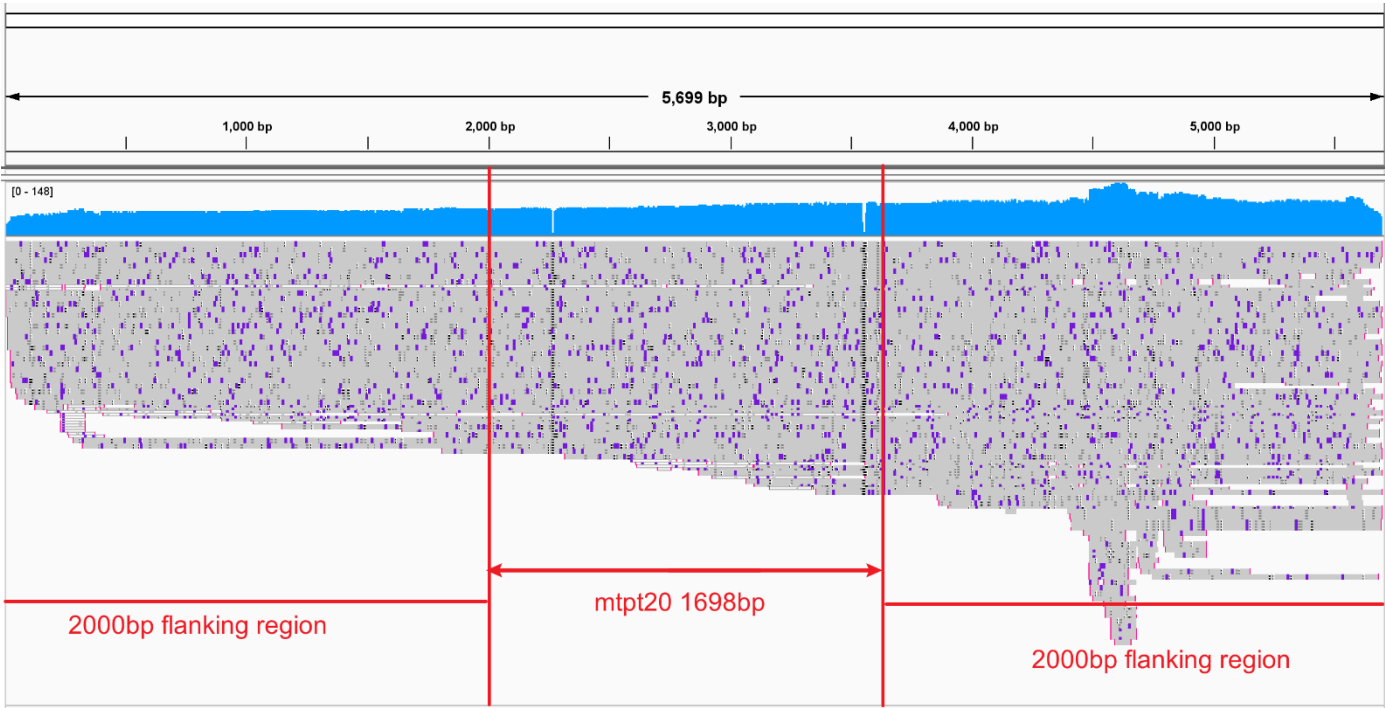

u alignment of Nanopore long reads to mtp21 and its flanking sequences.

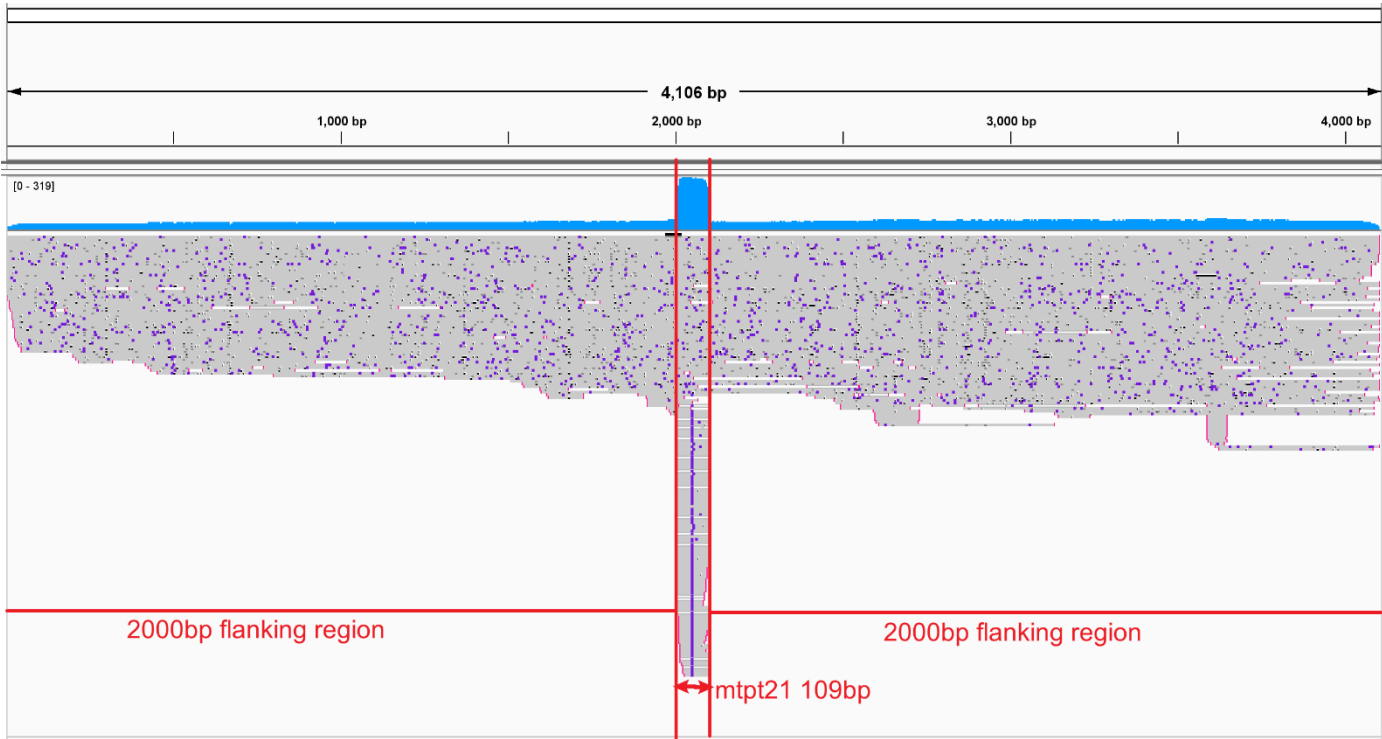

v alignment of Nanopore long reads to mtpt22 and its flanking sequences.

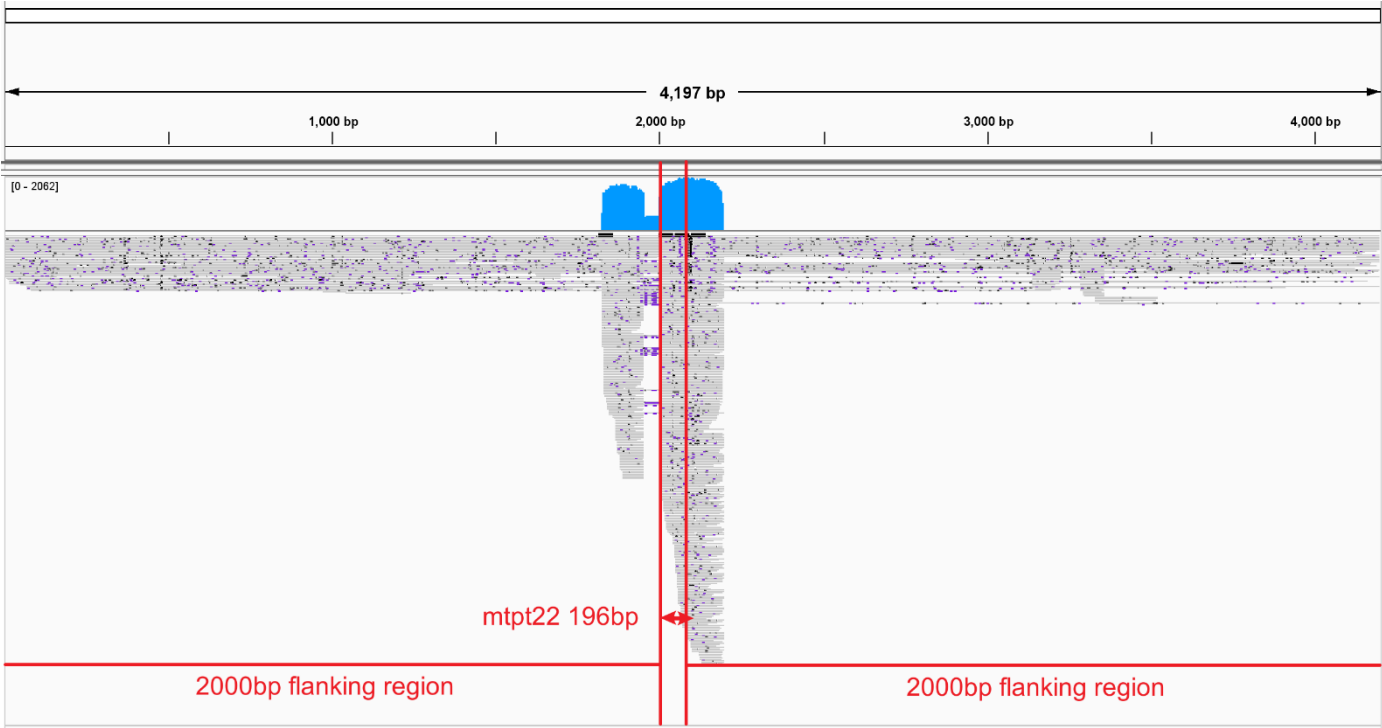

w alignment of Nanopore long reads to mtpt23 and its flanking sequences.

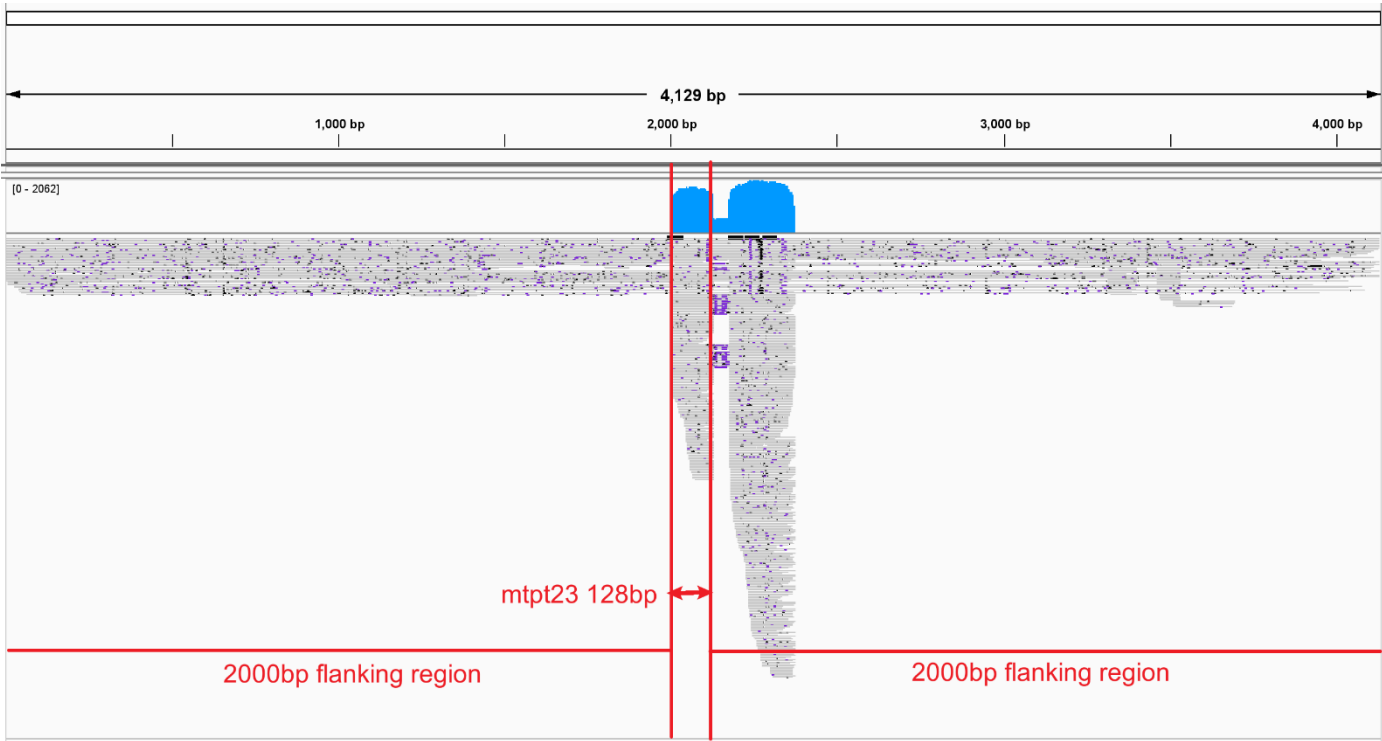

Figure S6 Alignments of the RNA sequencing reads to the coding sequences of twenty PCGs in the mitogenome of *S. officinalis*. The reference sequences are shown at the bottom. The gray lines above represent the reads mapped to the reference sequence. Bases matching those in the reference sequences are shaded in gray. Bases not matching those in the reference sequences are shown in green for “A”, brown for “G”, blue for “C”, and red for “T”. The RNA editing sites are shown in the red squares.

a alignment of RNA-seq reads to the coding sequence of *atp4*. 11 RNA-seq editing sites: atp4-59, 71, 89, 118, 215, 227, 248, 251, 395, 407, and 416 were highlighted in red squares.

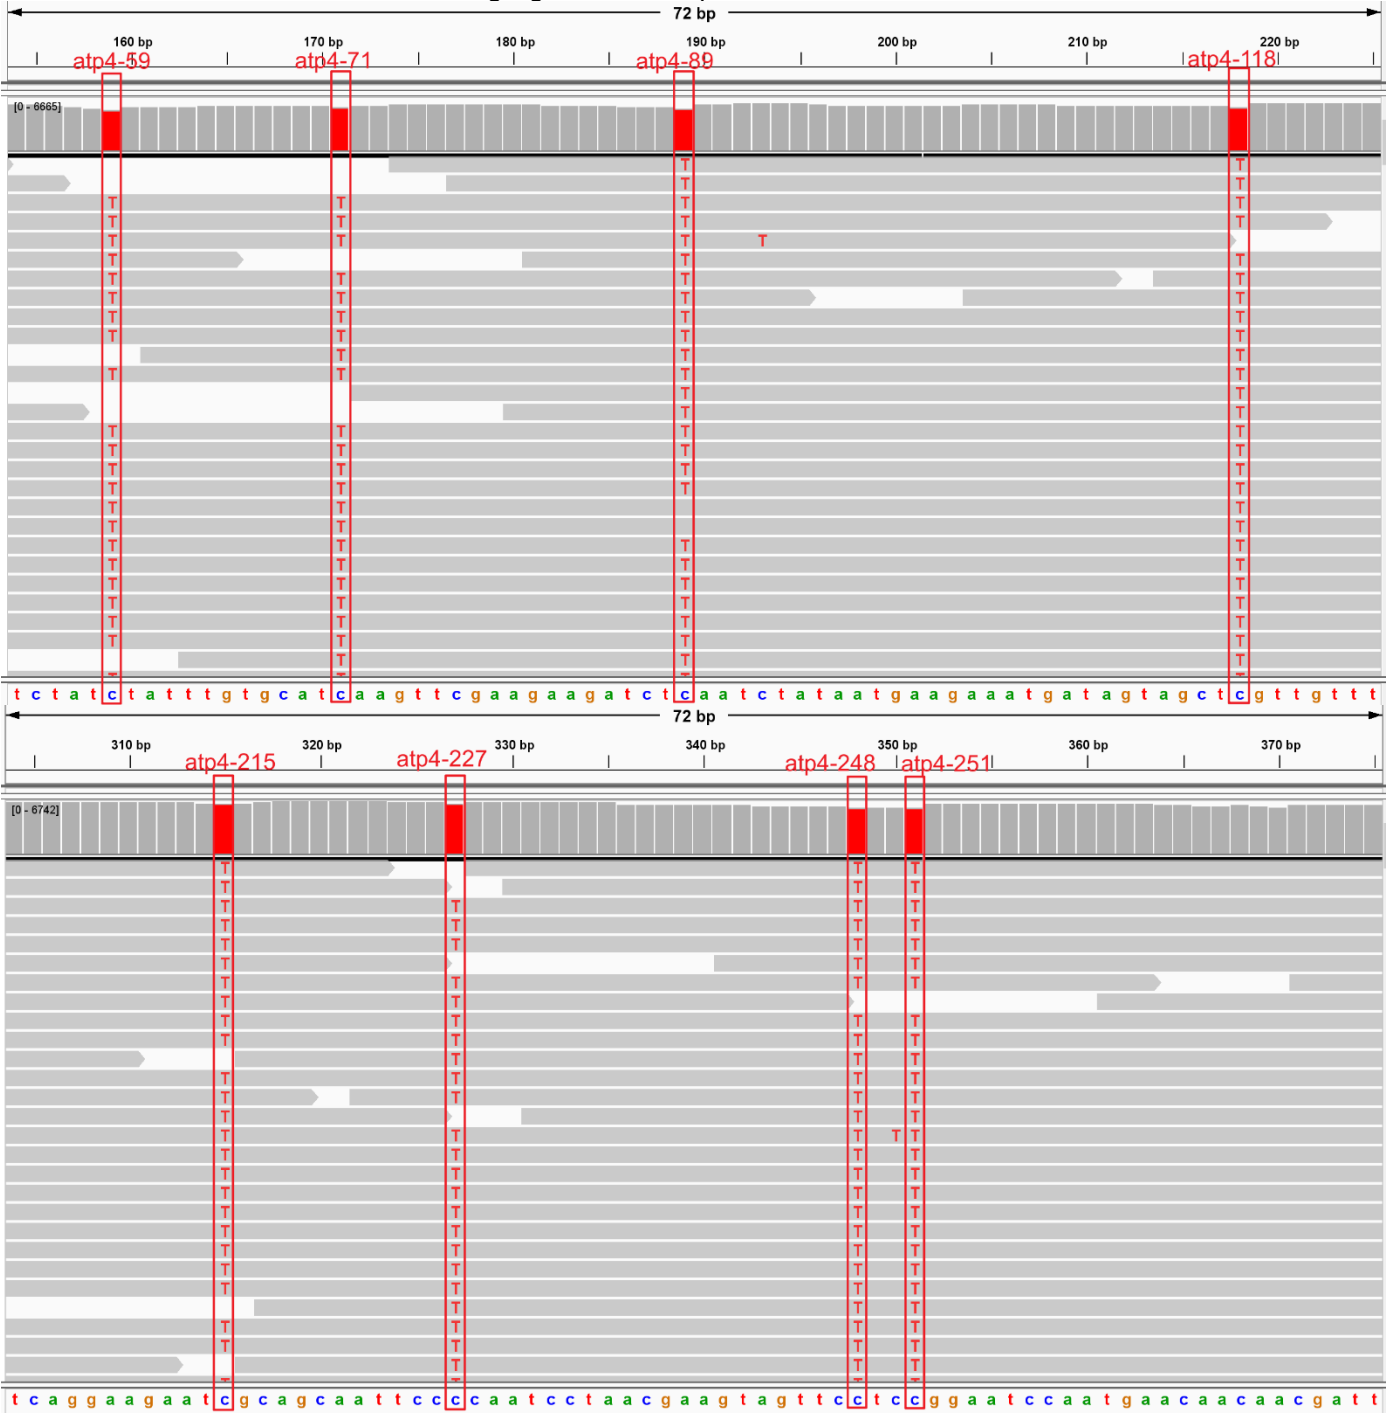

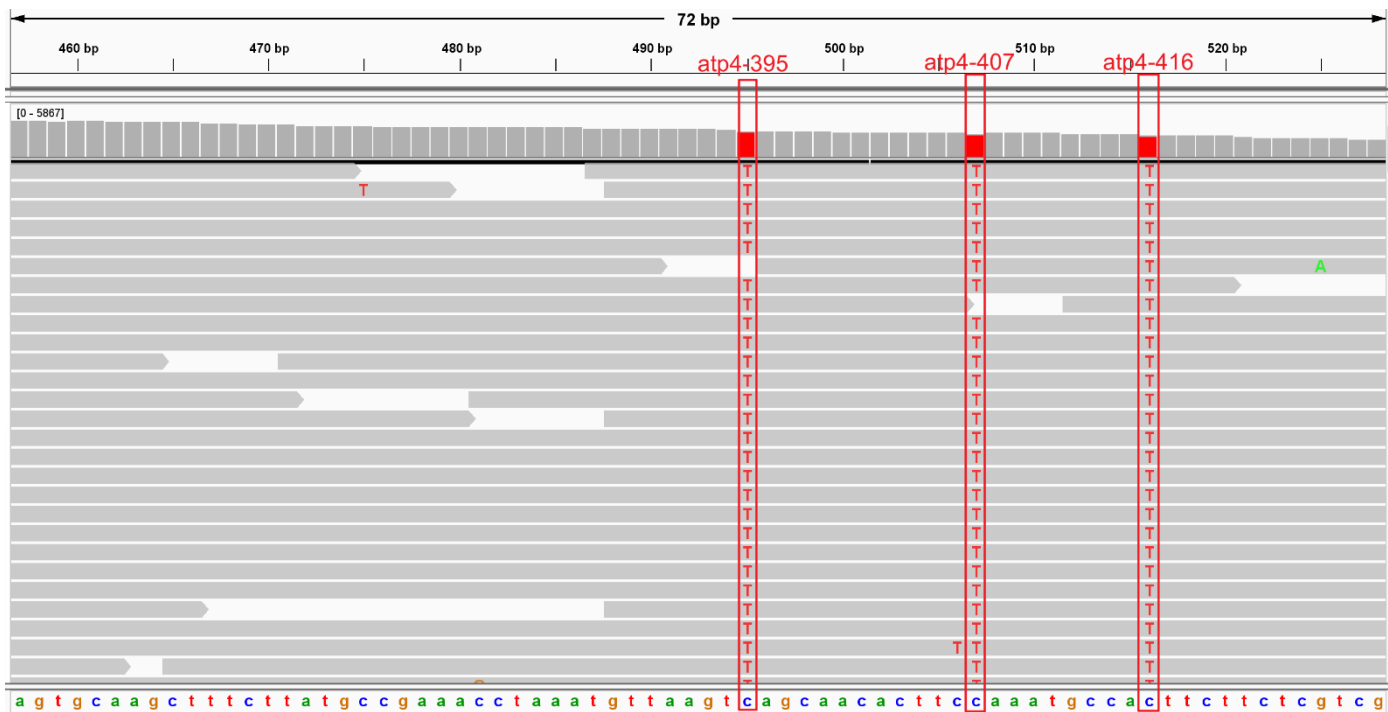

b alignment of RNA-seq reads to the coding sequence of *atp6*. Eight RNA-seq editing sites: *atp6*-26, 77, 146, 164, 172, 311, 370, and 372 were highlighted in red squares.

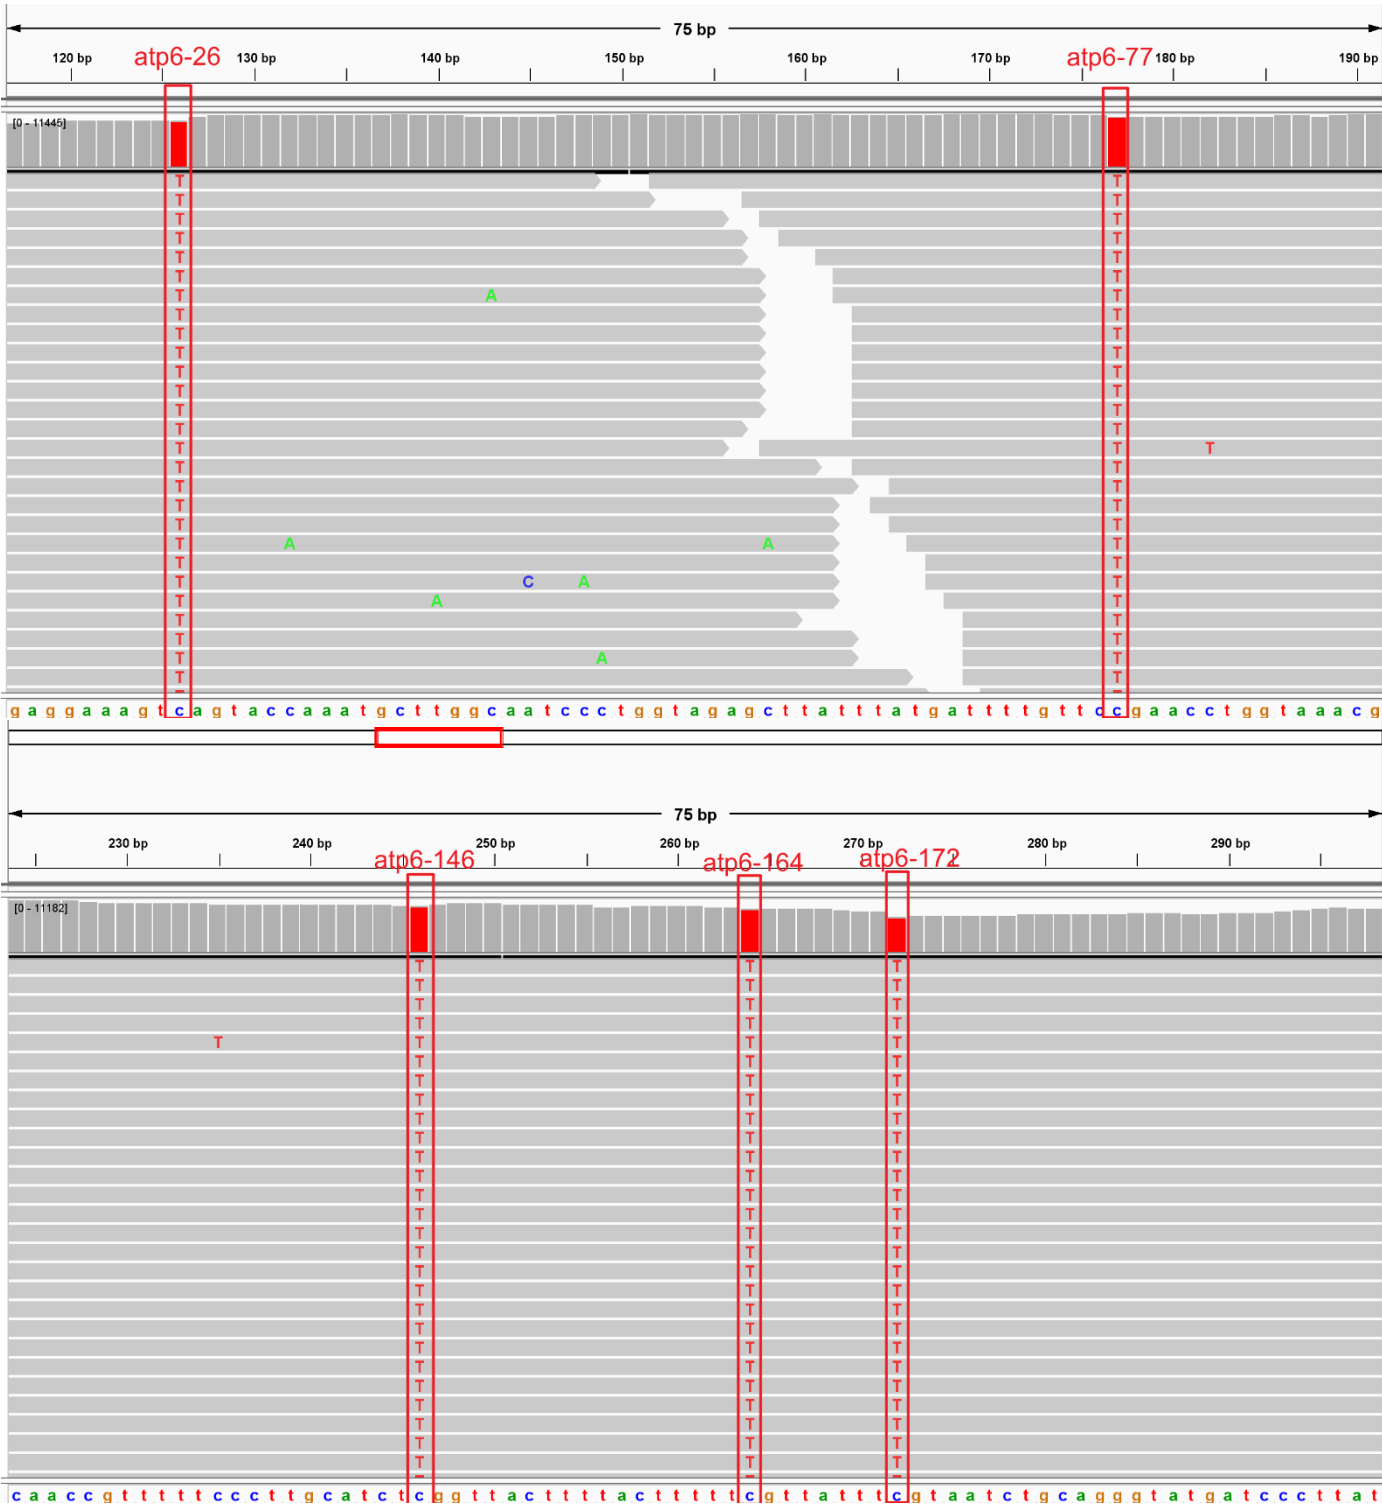



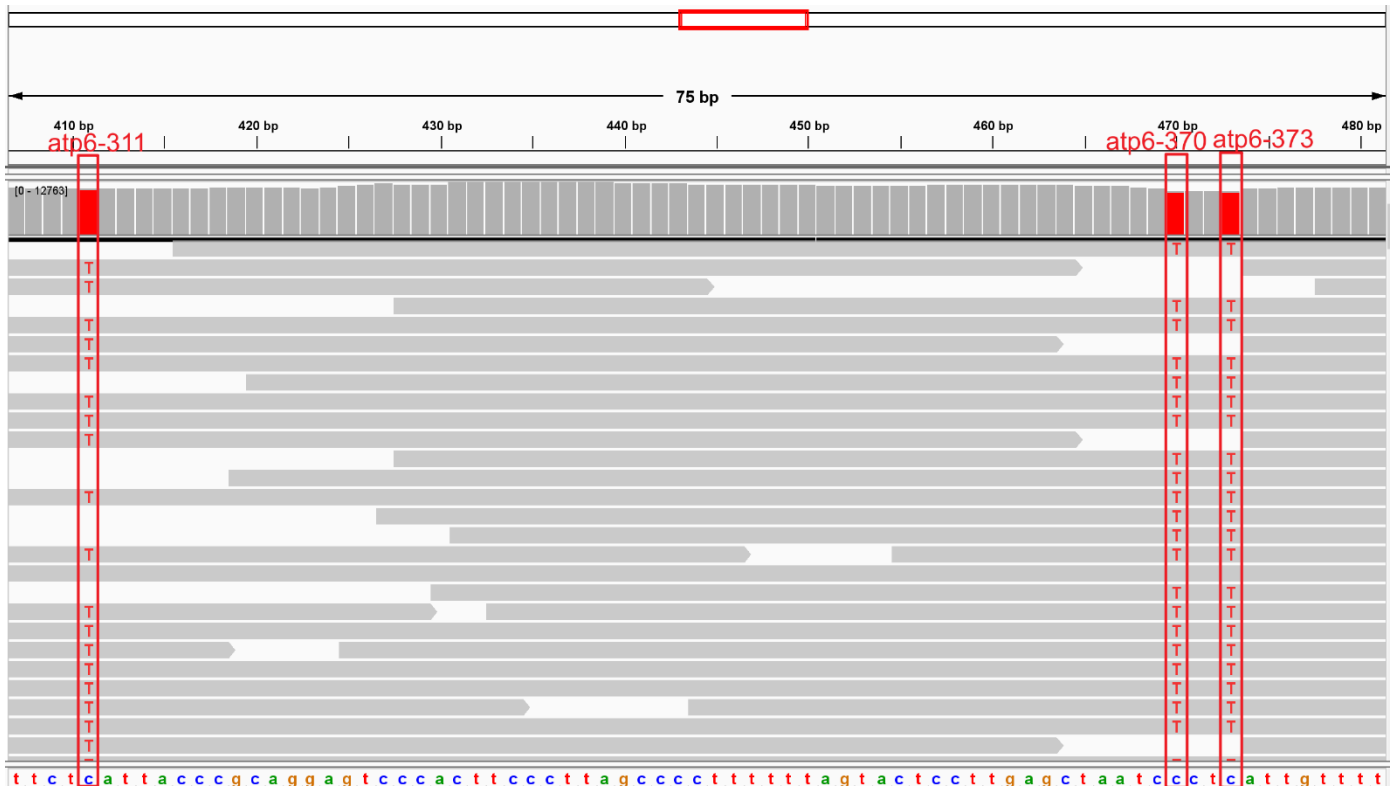

c alignment of RNA-seq reads to the coding sequence of *atp8*. Two RNA-seq editing sites: *atp8*-30 and 58 were highlighted in red squares.

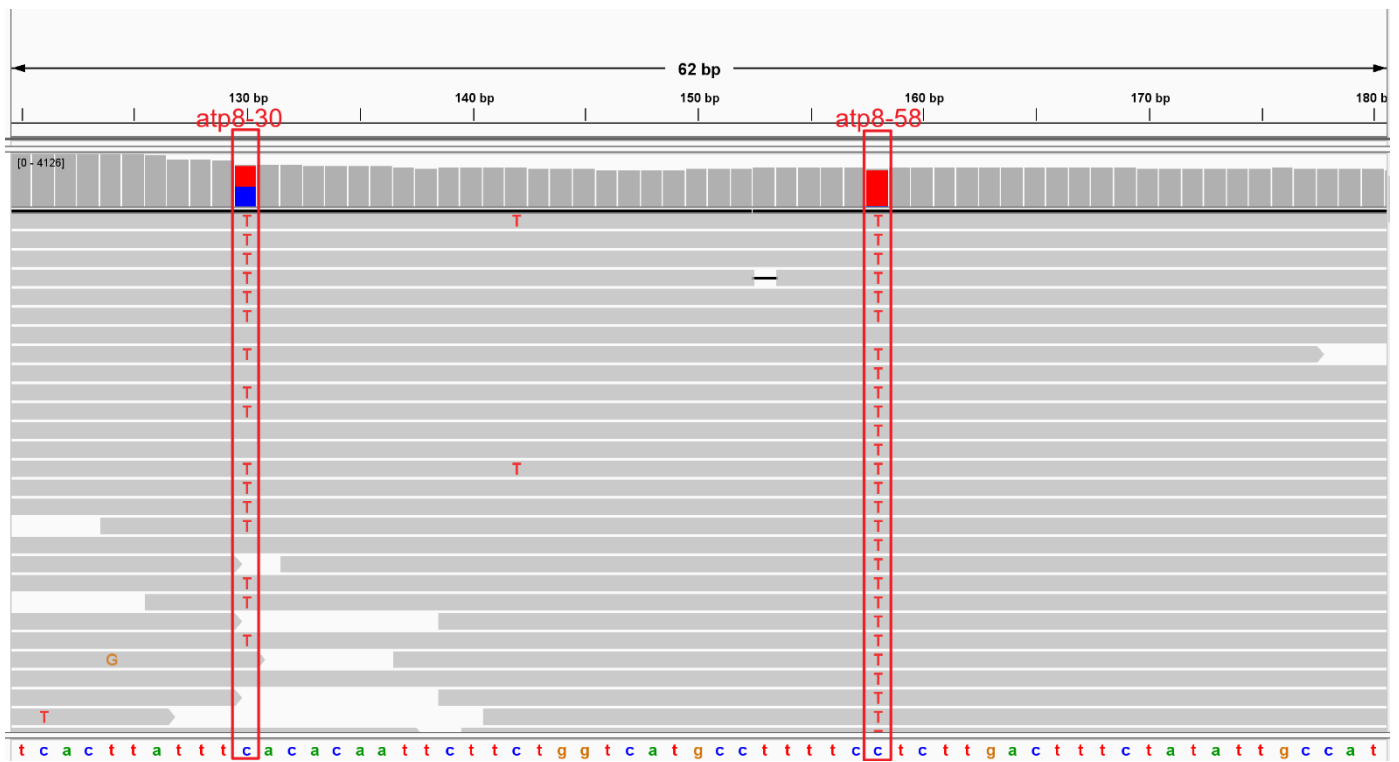

d alignment of RNA-seq reads to the coding sequence of *atp9*. One RNA-seq editing site: atp9-212 was highlighted in red squares.

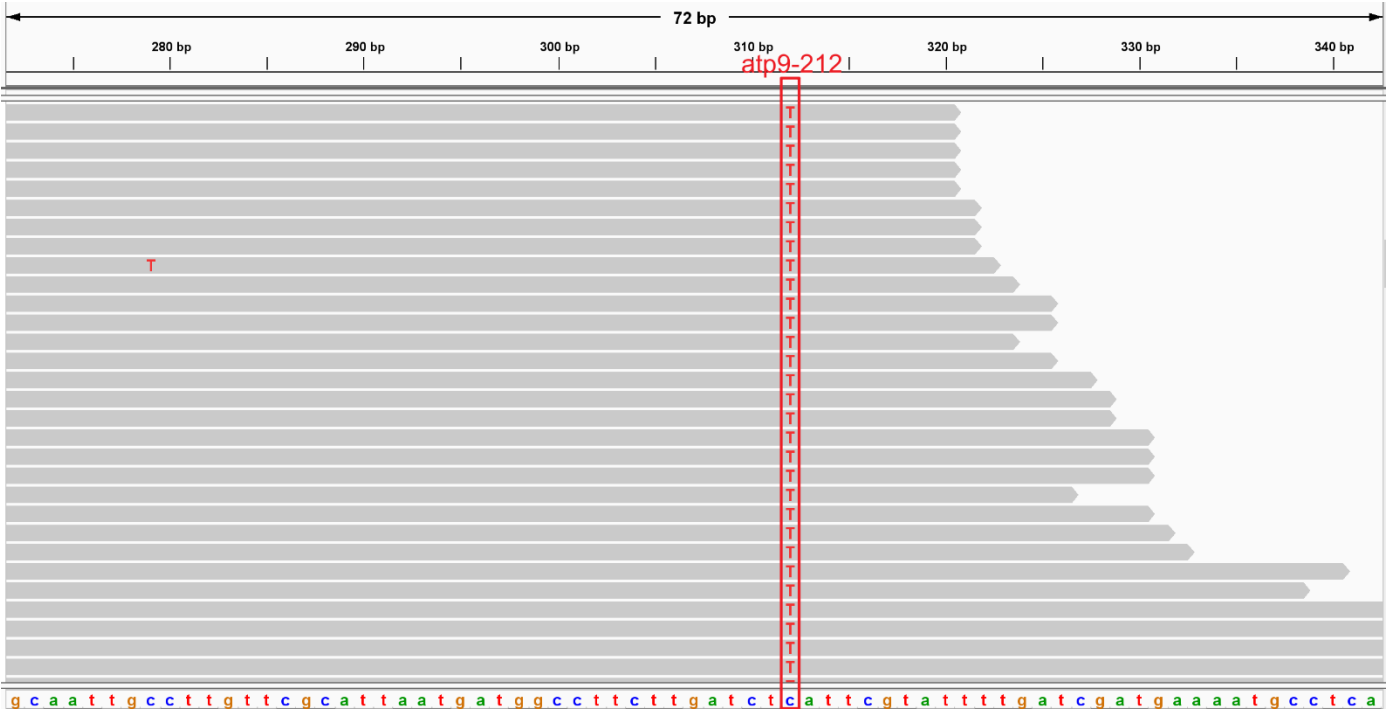

e alignment of RNA-seq reads to the coding sequence of *ccmB*. 13 RNA-seq editing sites: *ccmB*-28, 80, 87, 128, 286, 304, 313, 338, 367, 380, 424, 428, and 551 were highlighted in red squares.

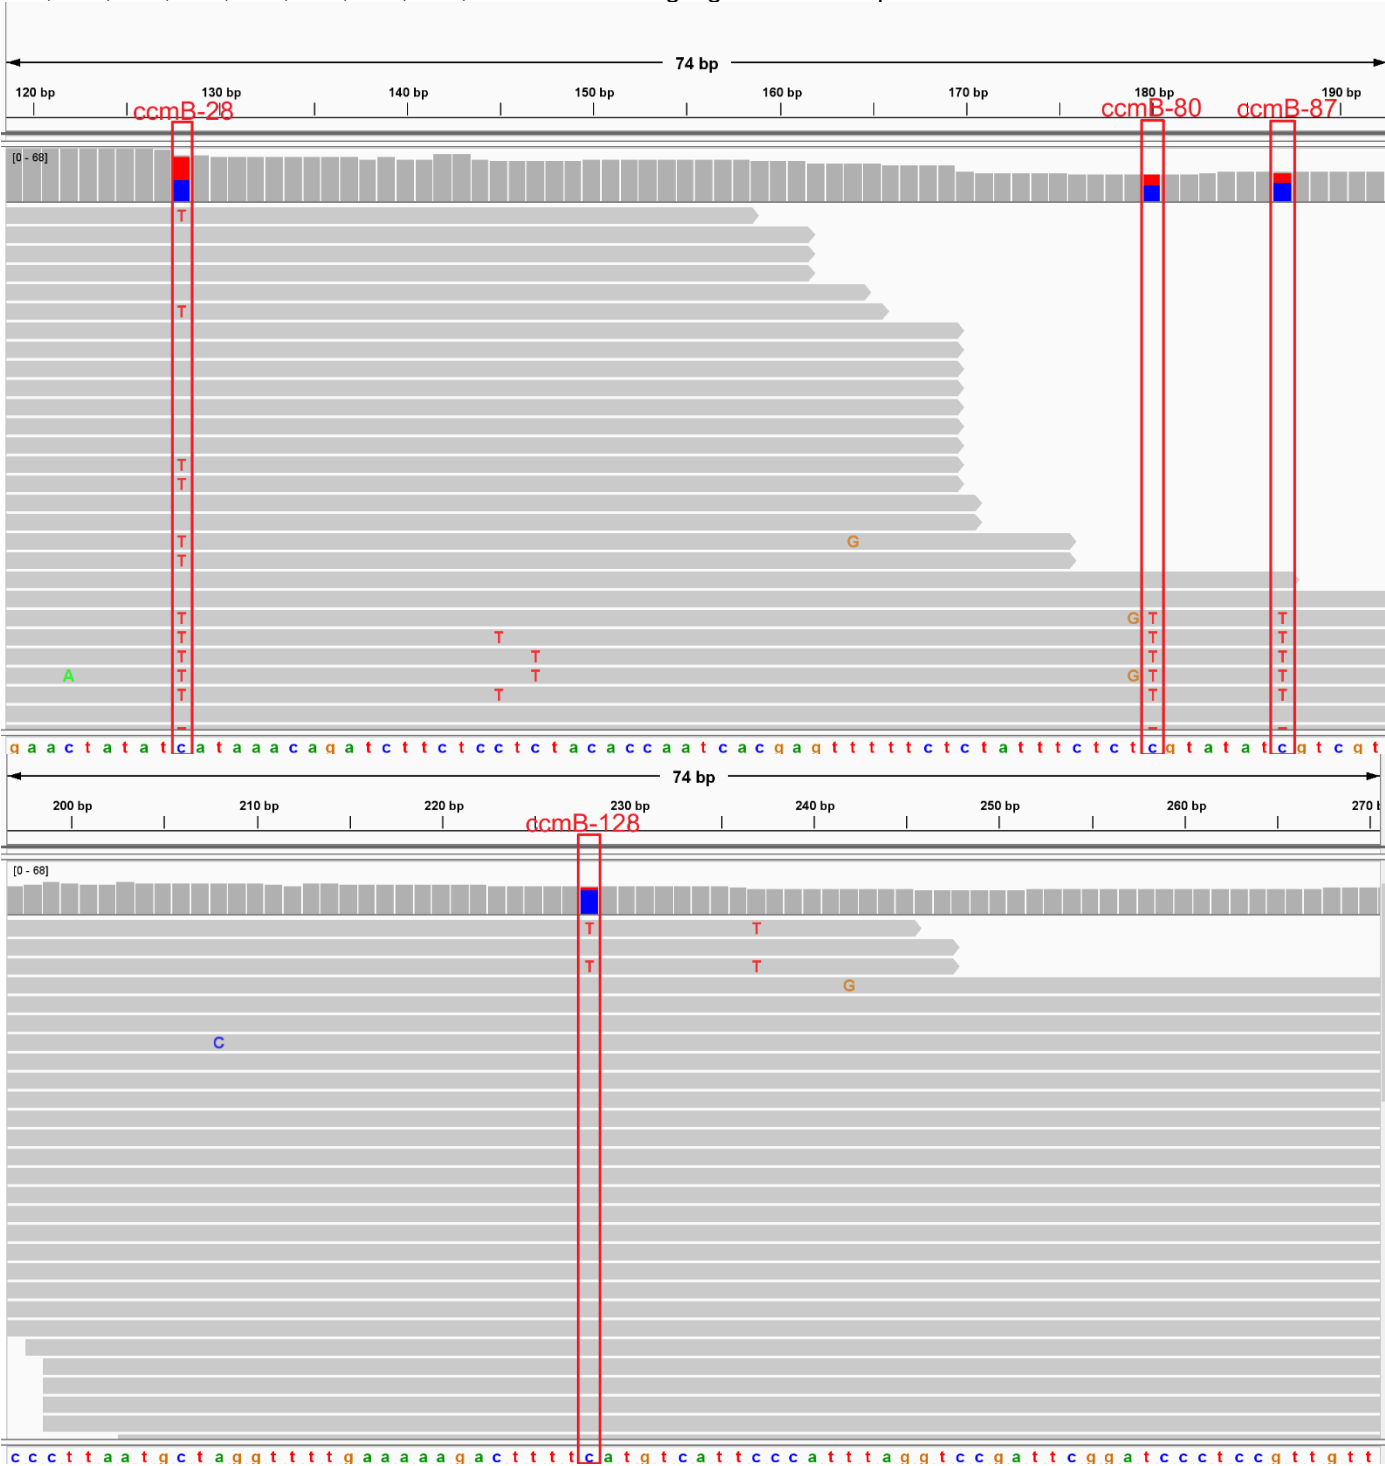

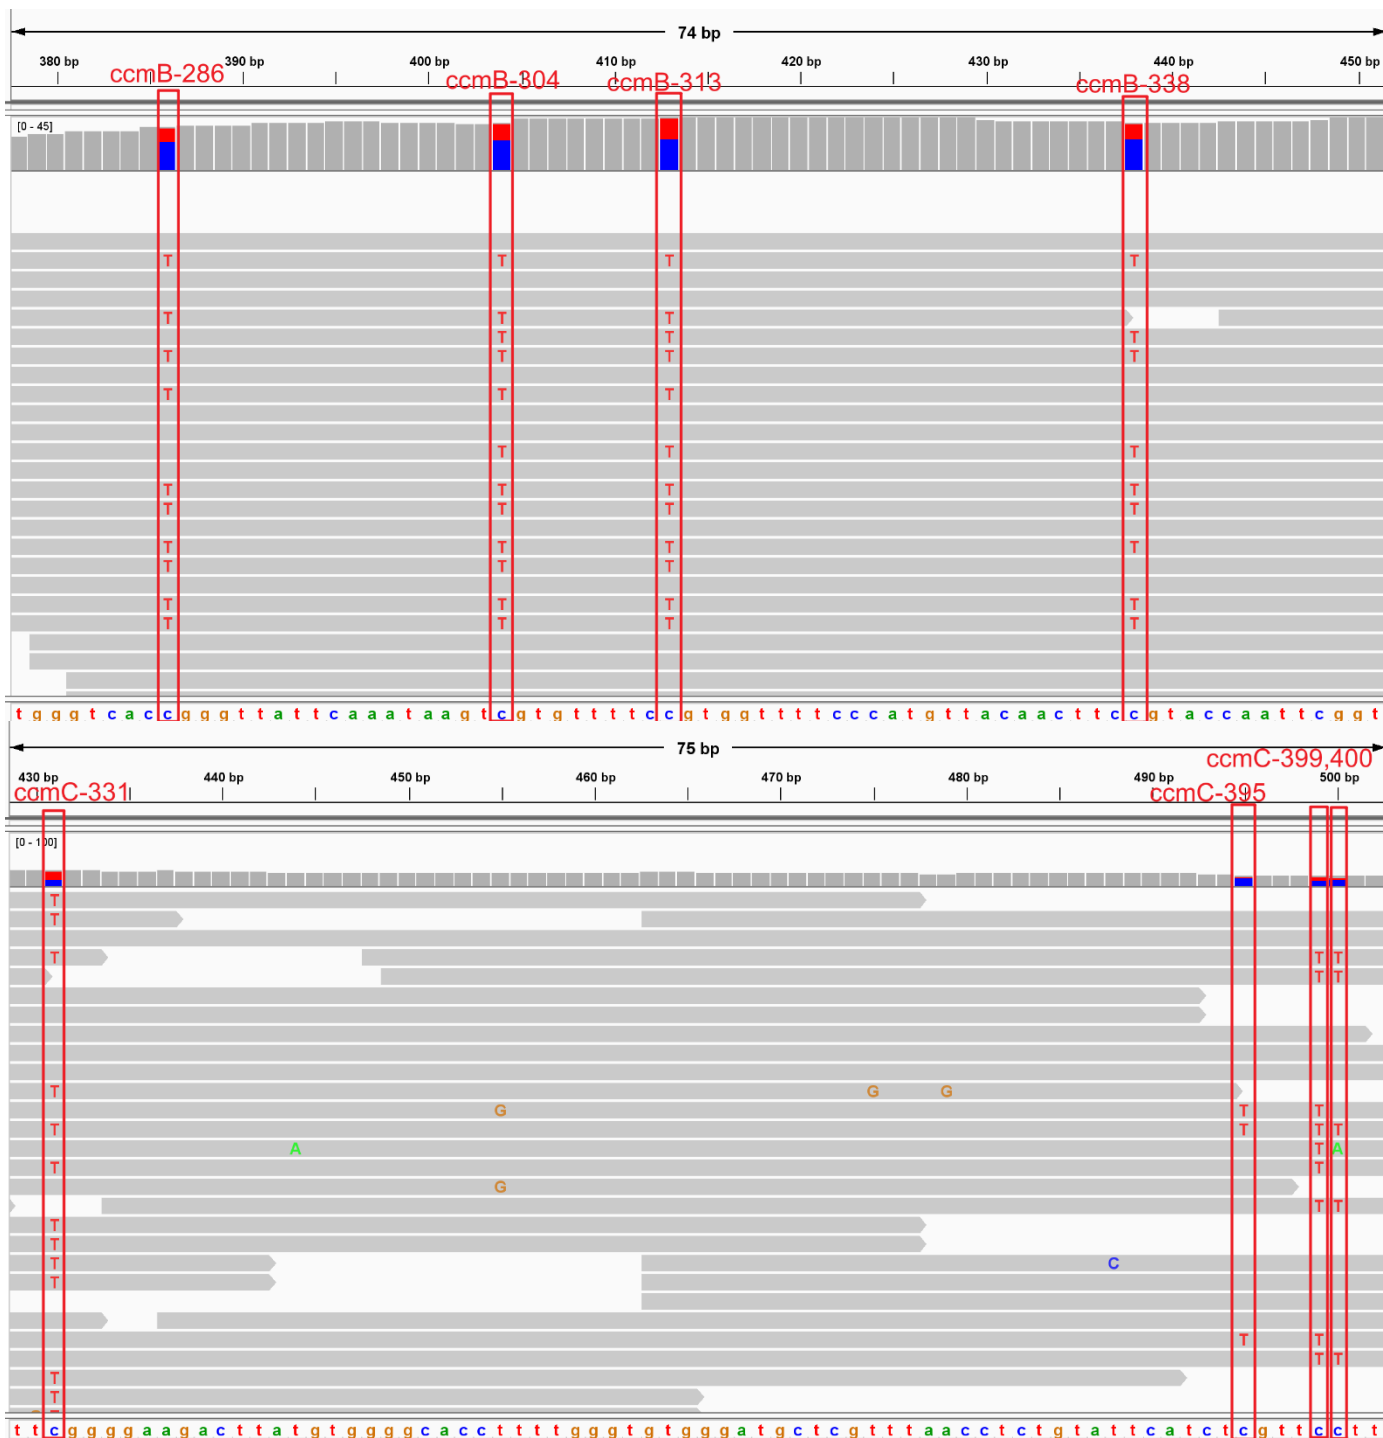

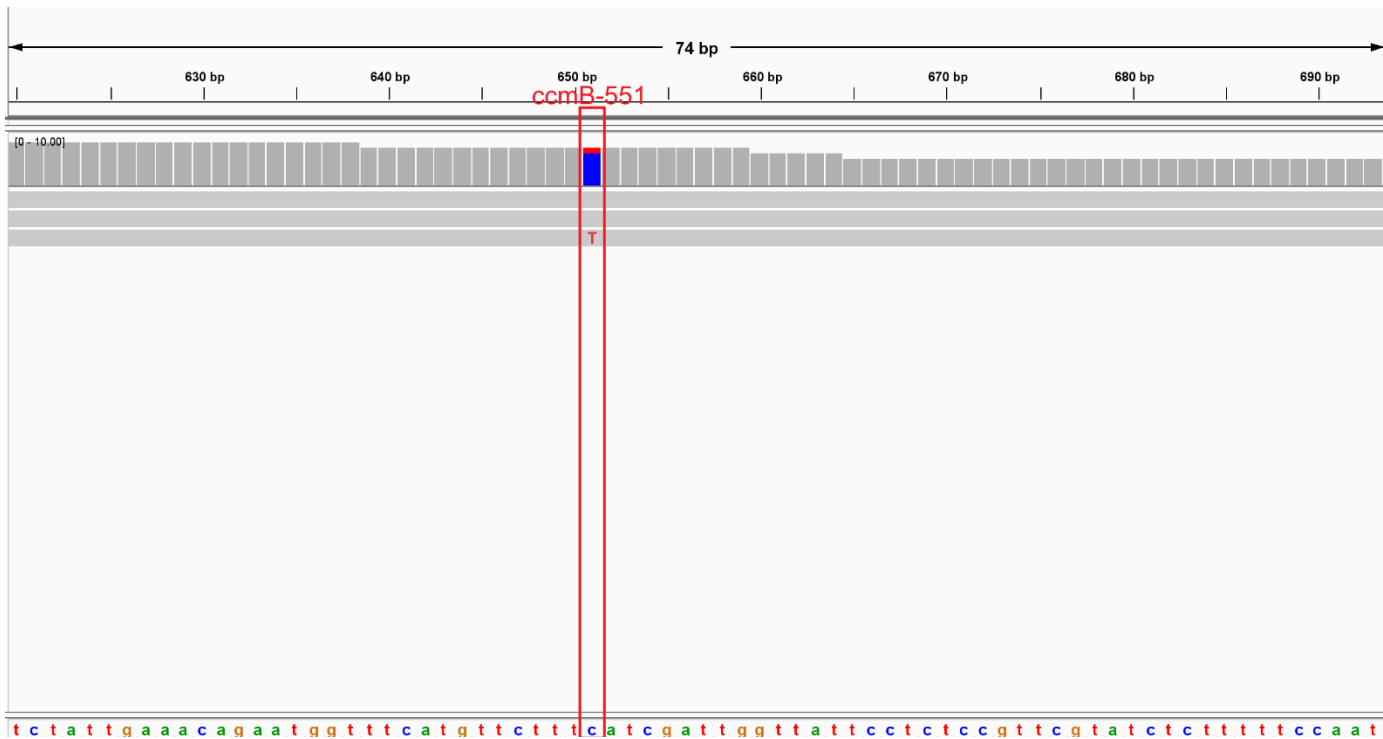

f alignment of RNA-seq reads to the coding sequence of *ccmC*. 26 RNA-seq editing sites: *ccmC*-38, 76, 103, 115, 133, 161, 179, 184, 253, 281, 299, 331, 395, 399, 400, 436, 446, 458, 548, 568, 575, 605, 608, 614, 650, and 673 were highlighted in red squares.

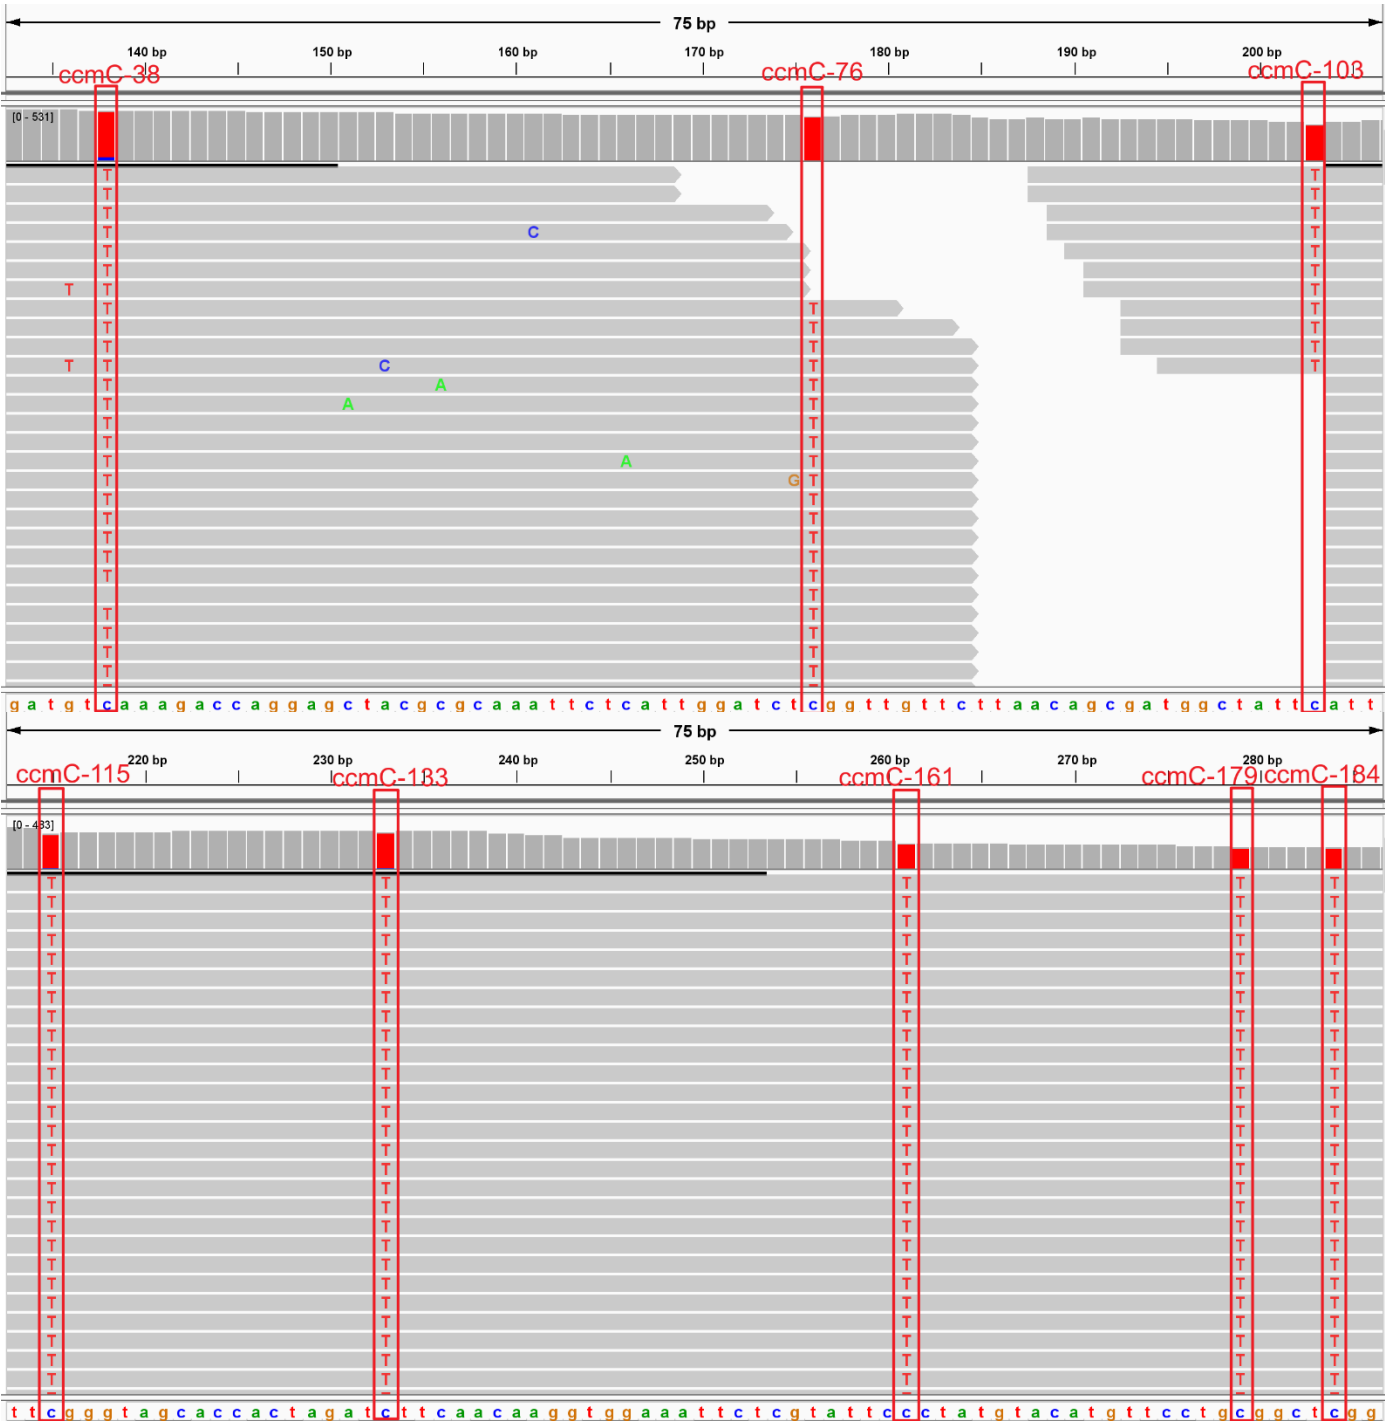

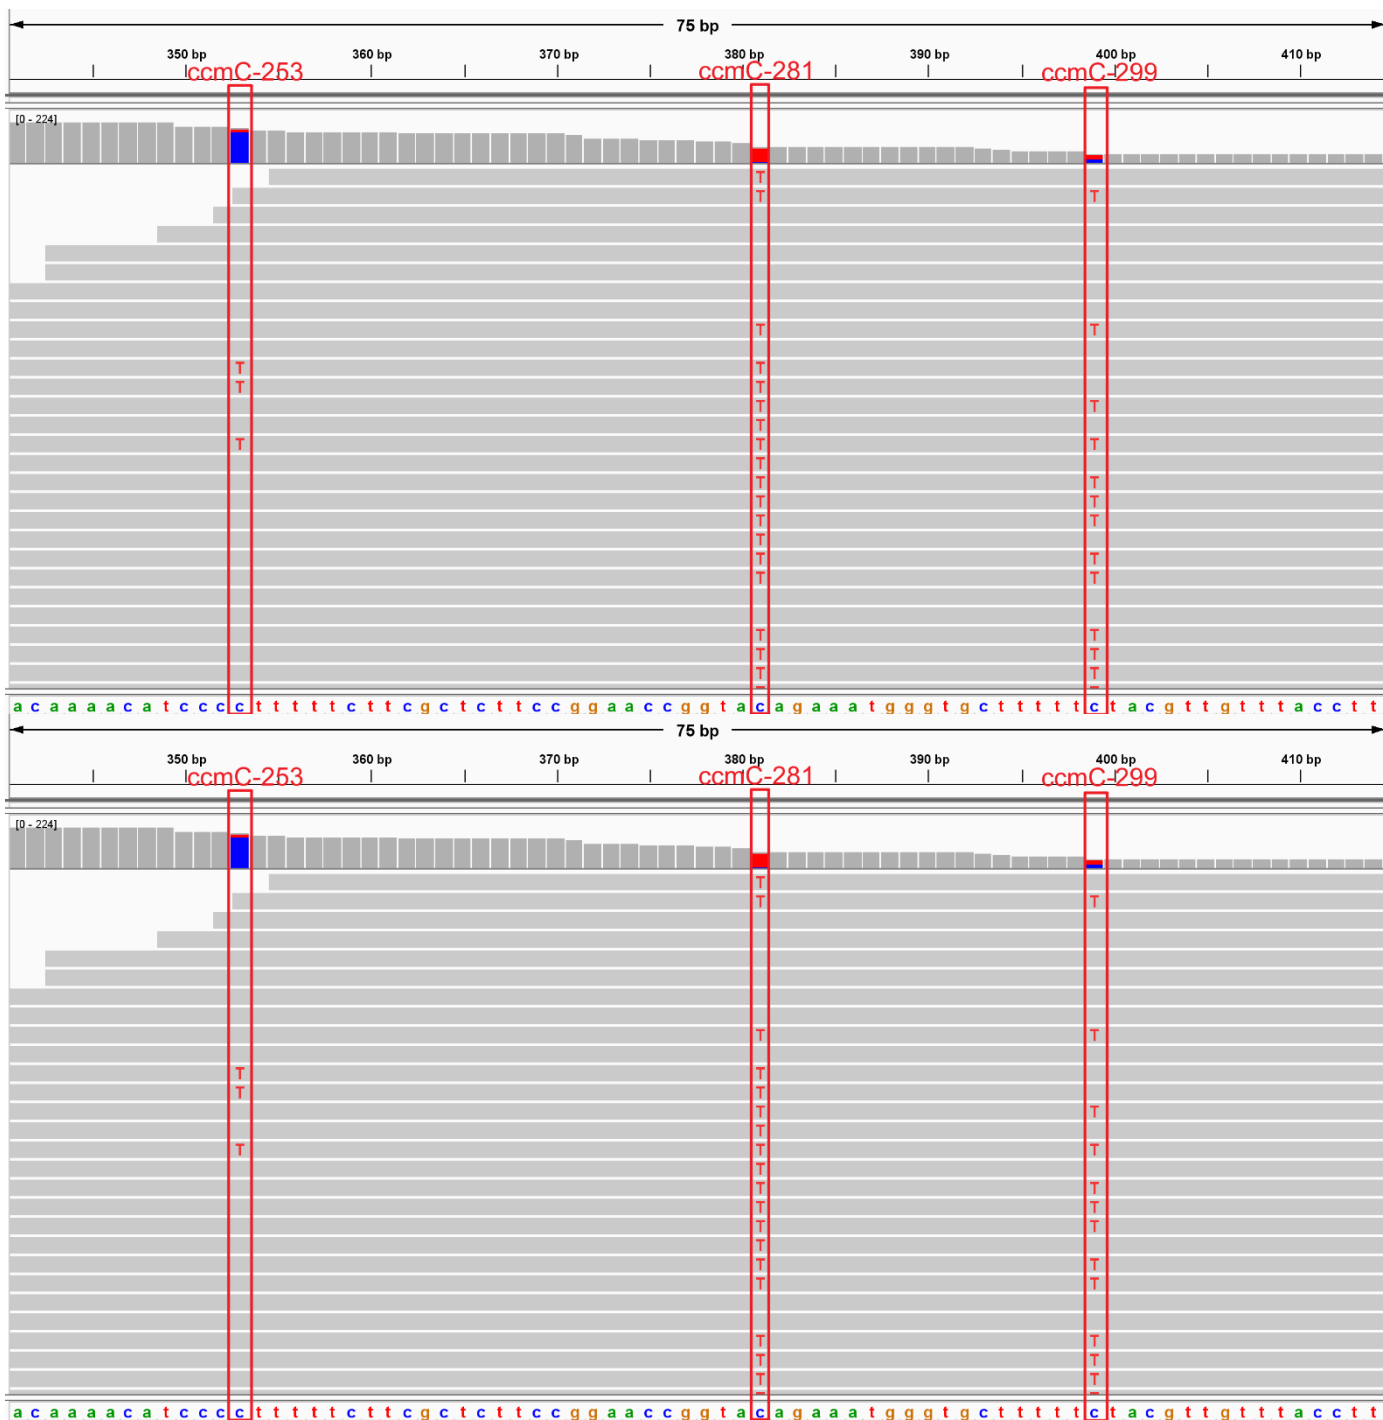

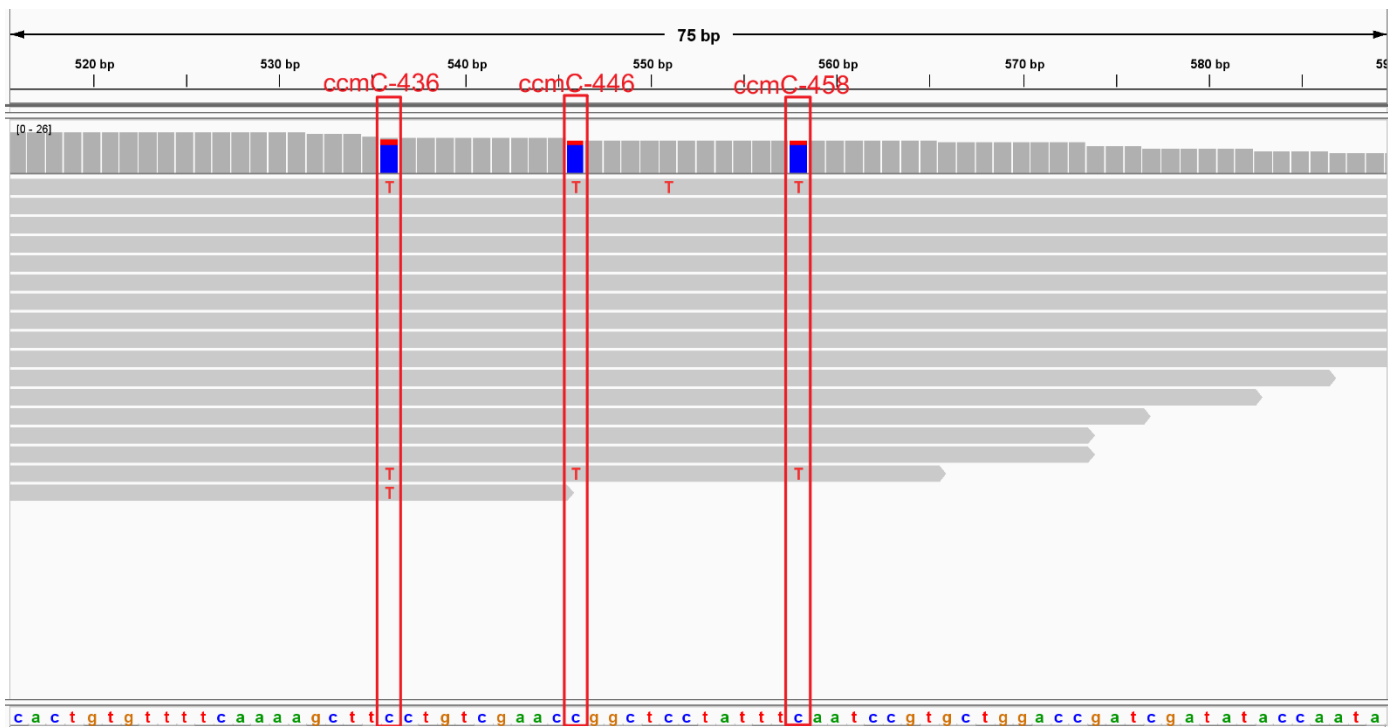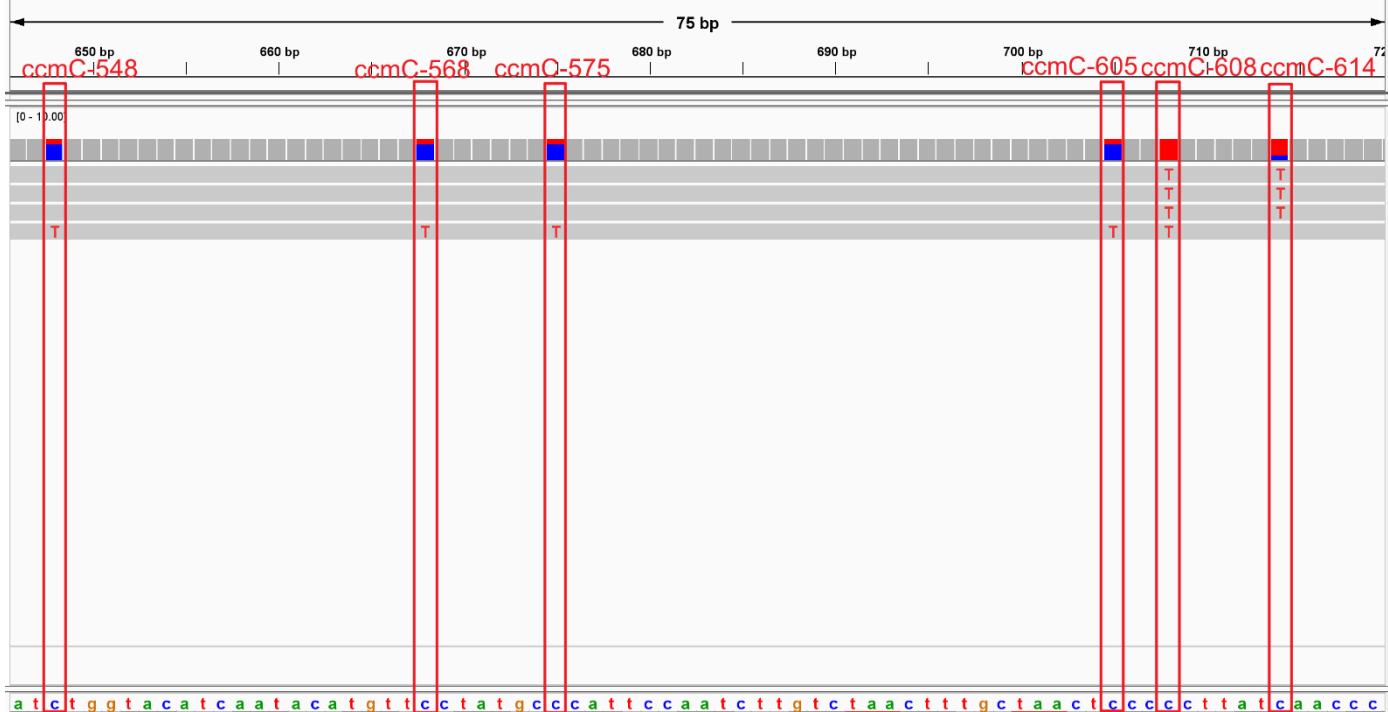



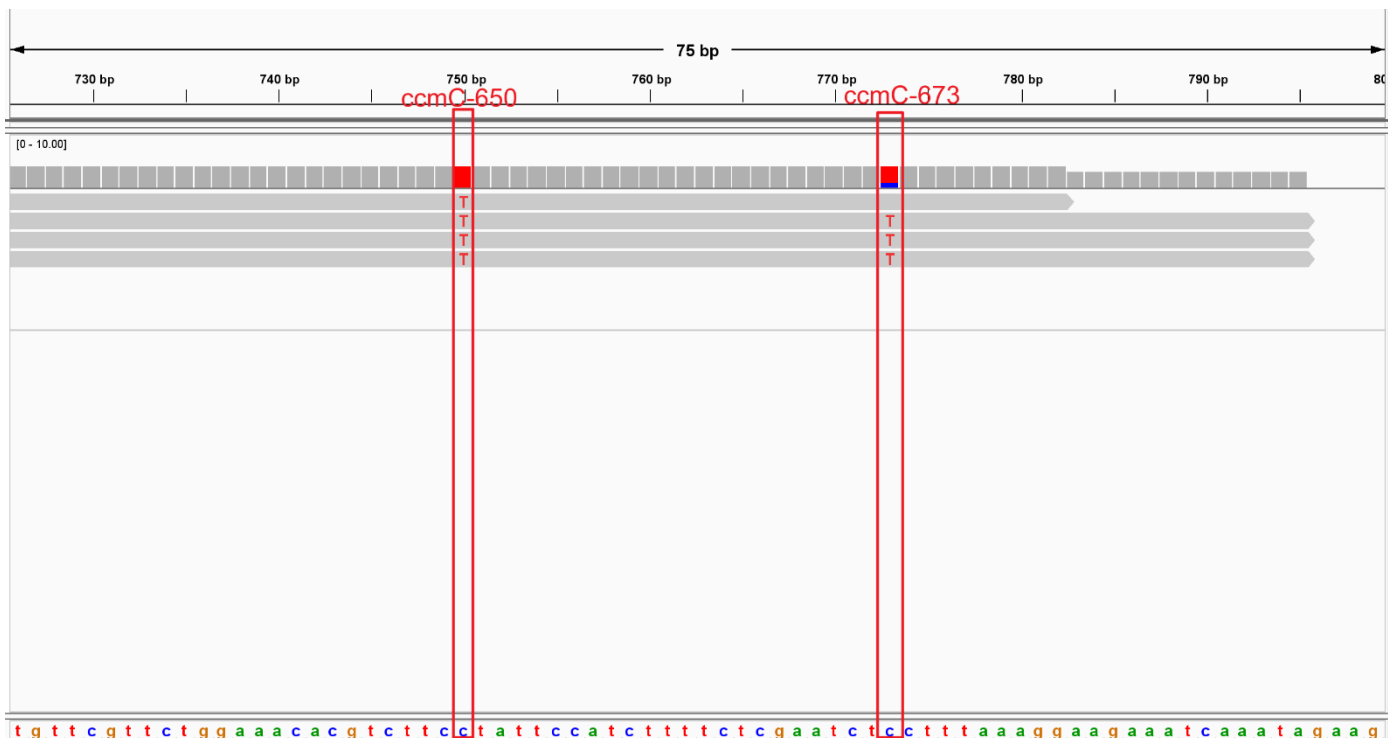

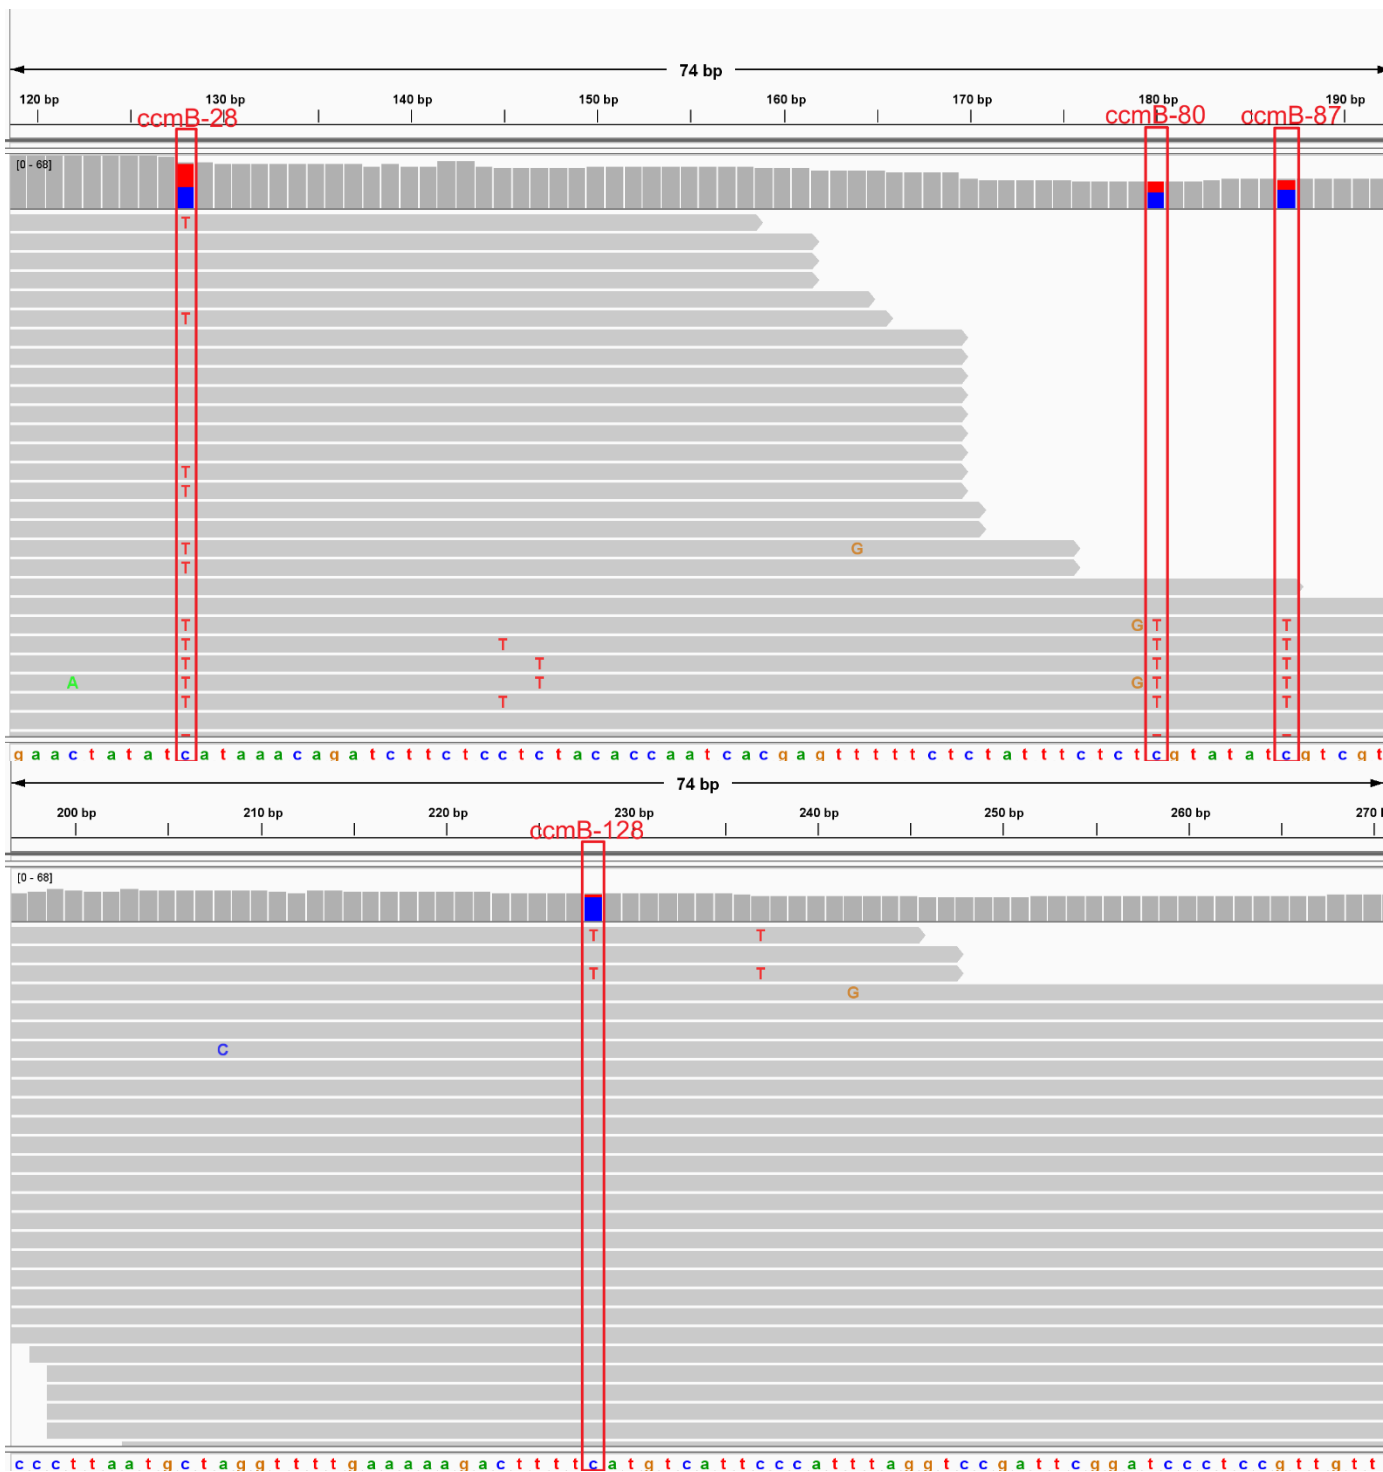

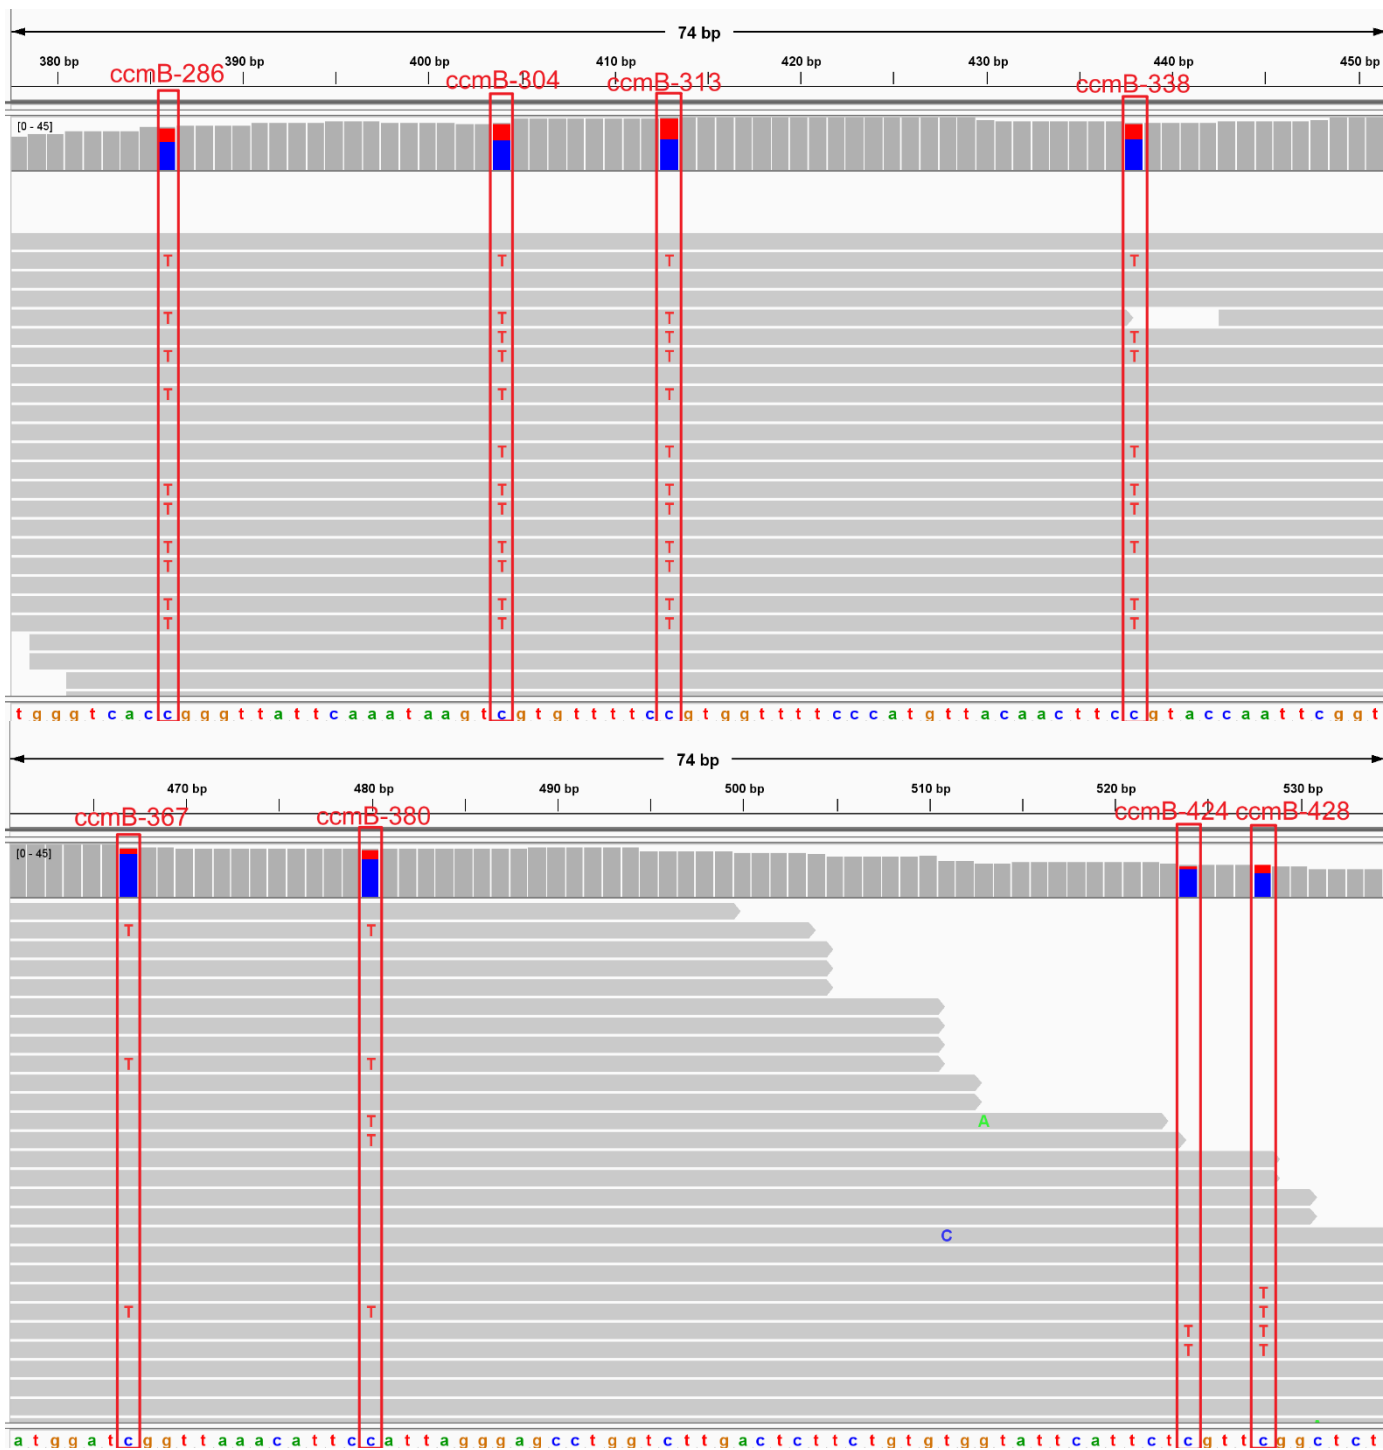



g alignment of RNA-seq reads to the coding sequence of *ccmFc*. 17 RNA-seq editing sites: *ccmFc*-16, 38, 50, 52, 103, 122, 146, 151, 155, 310, 321, 334, 378, 390, 406, 1228, 1233 were highlighted in red squares.

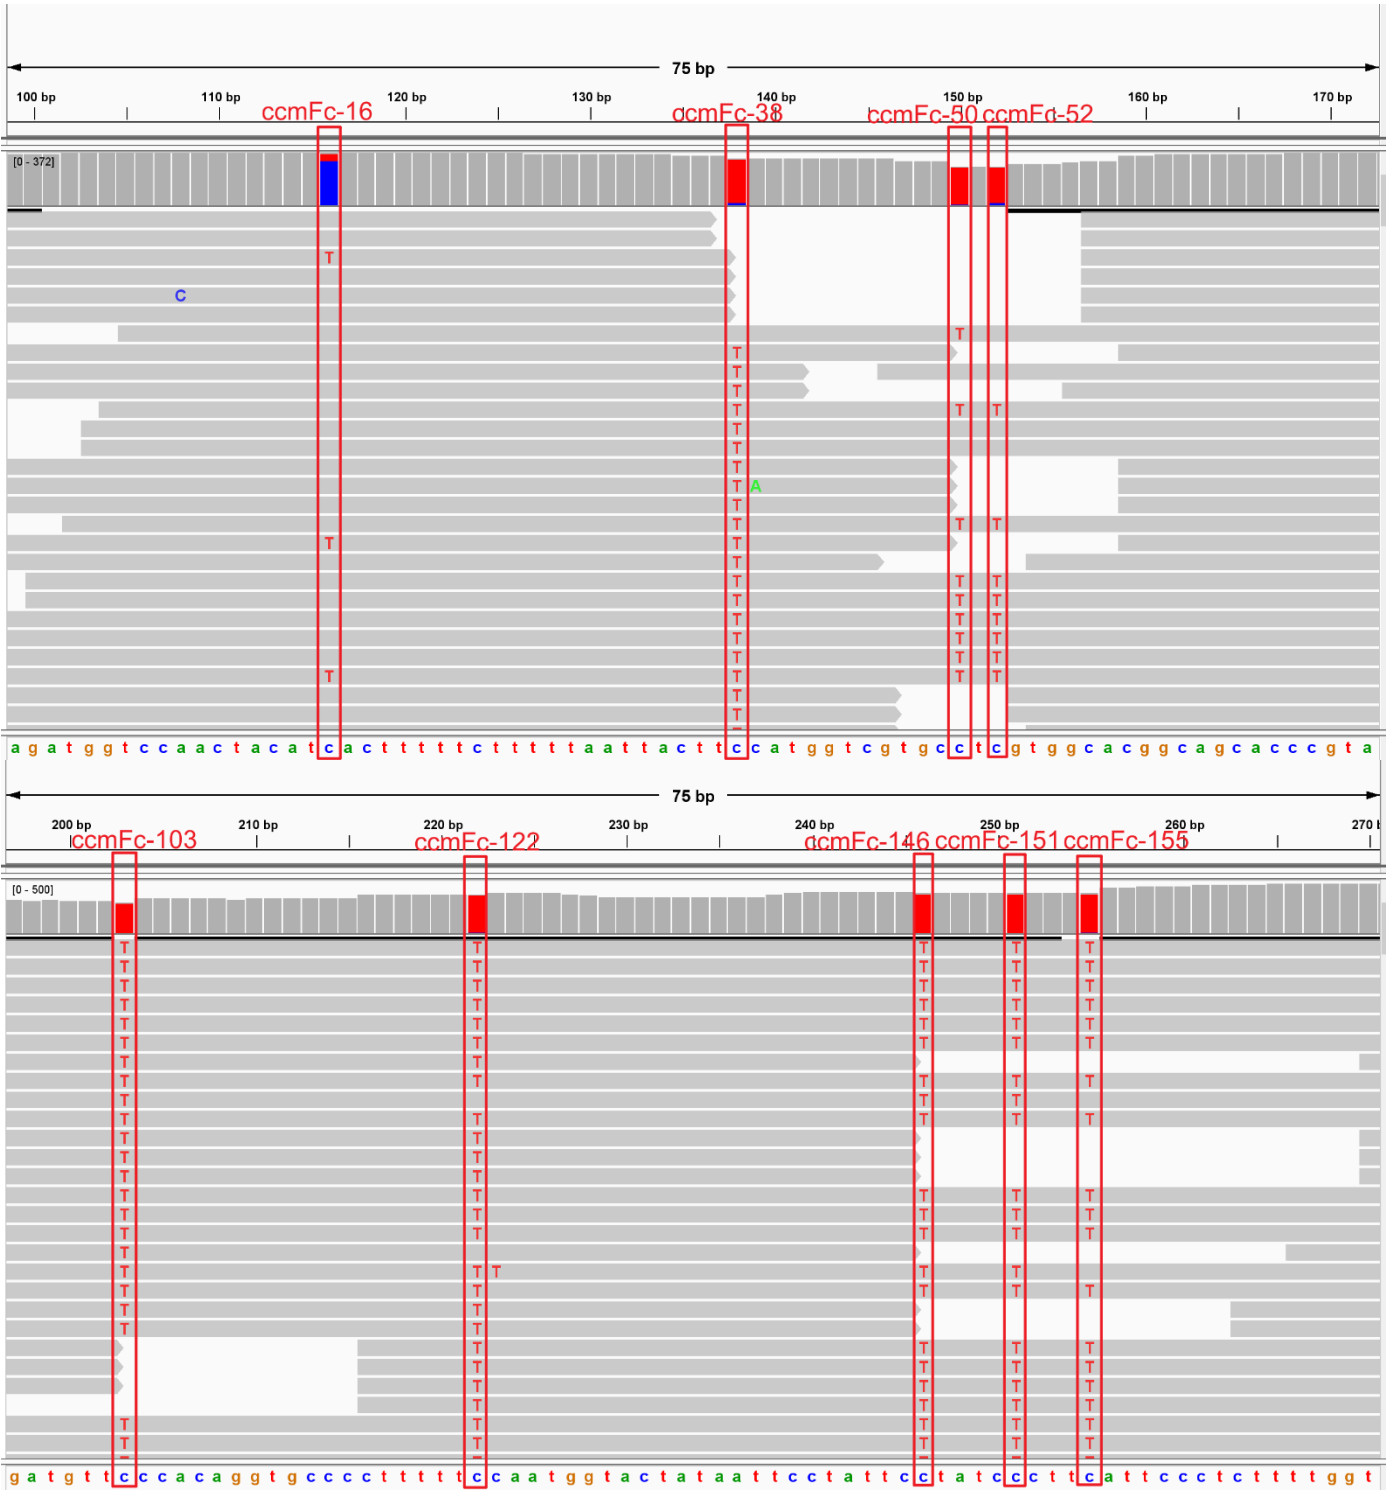

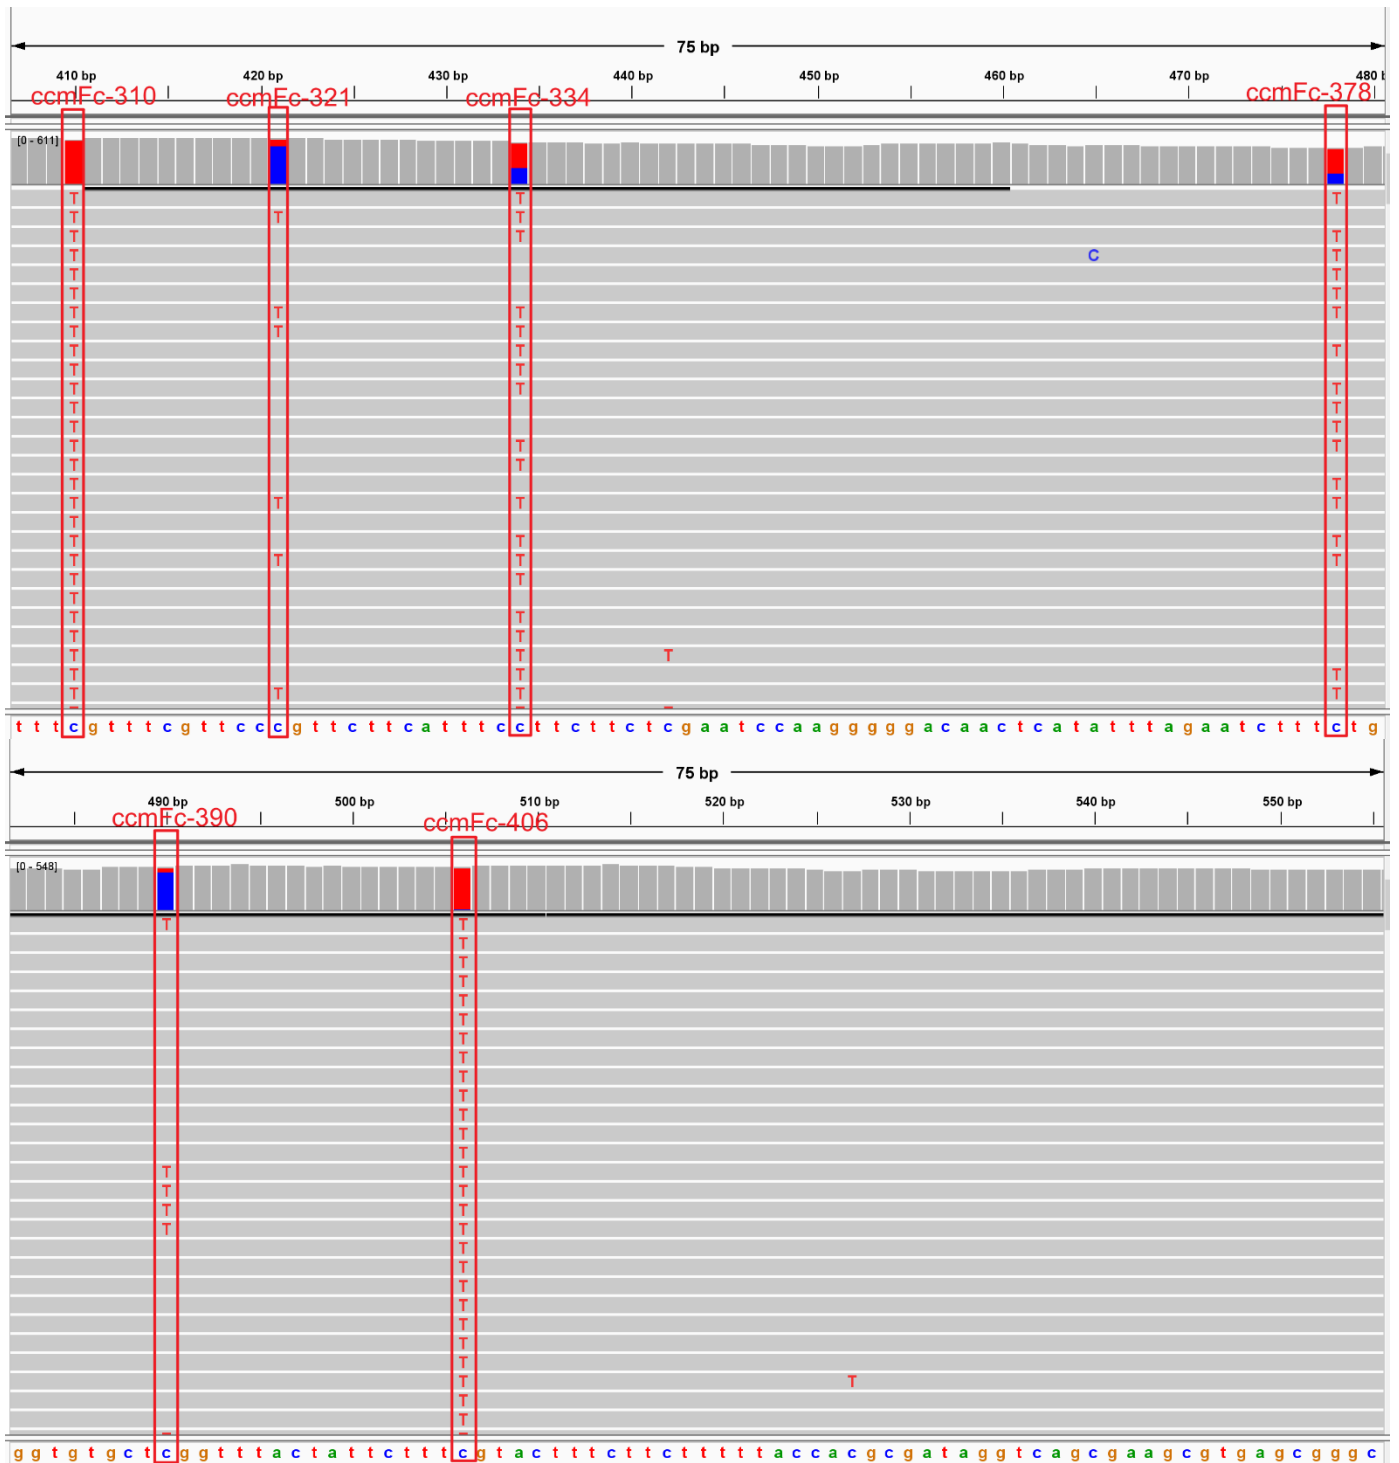

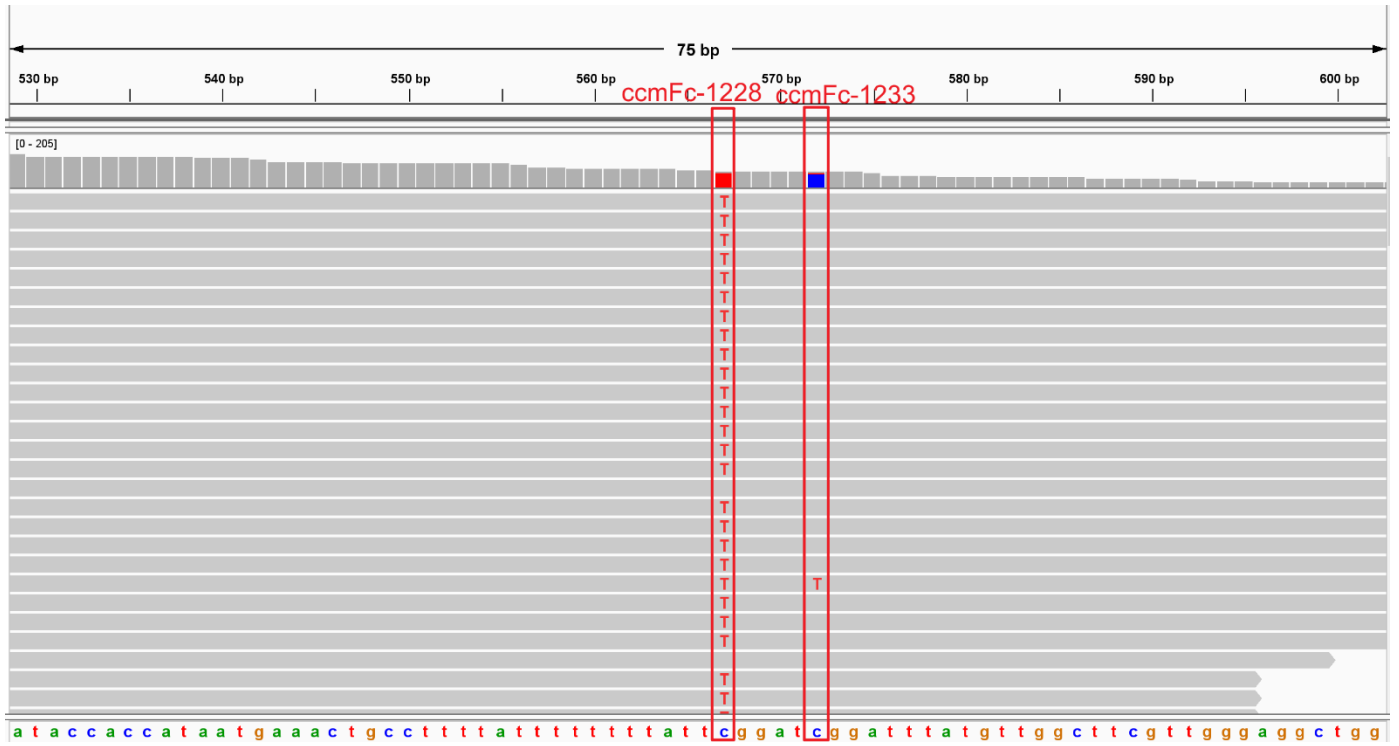

h alignment of RNA-seq reads to the coding sequence of *ccmFn*. 30 RNA-seq editing sites: *ccmFn*-38, 98, 137, 142, 151, 165, 248, 256, 283, 371, 378, 713, 722, 732, 760, 782, 794, 809, 867, 958, 1276, 1304, 1321, 1336, 1354, 1387, 1448, 1472, 1484, 1519 were highlighted in red squares.

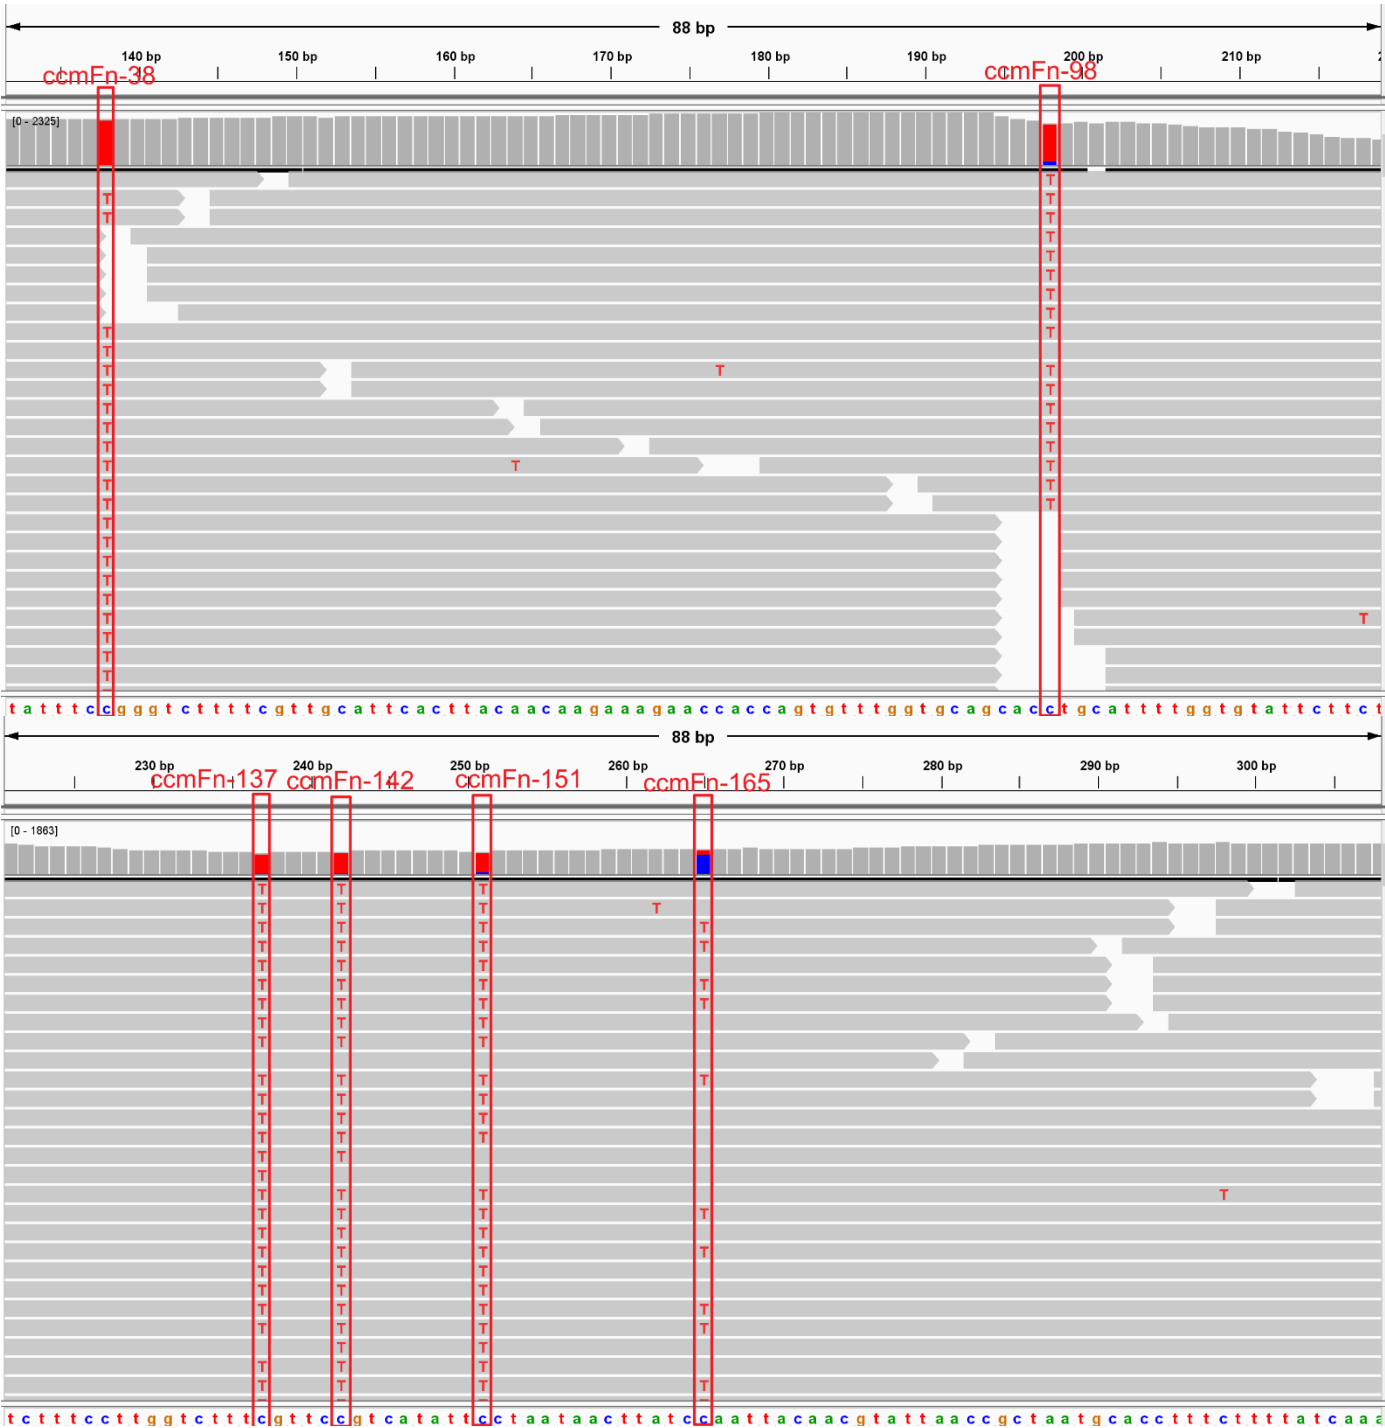



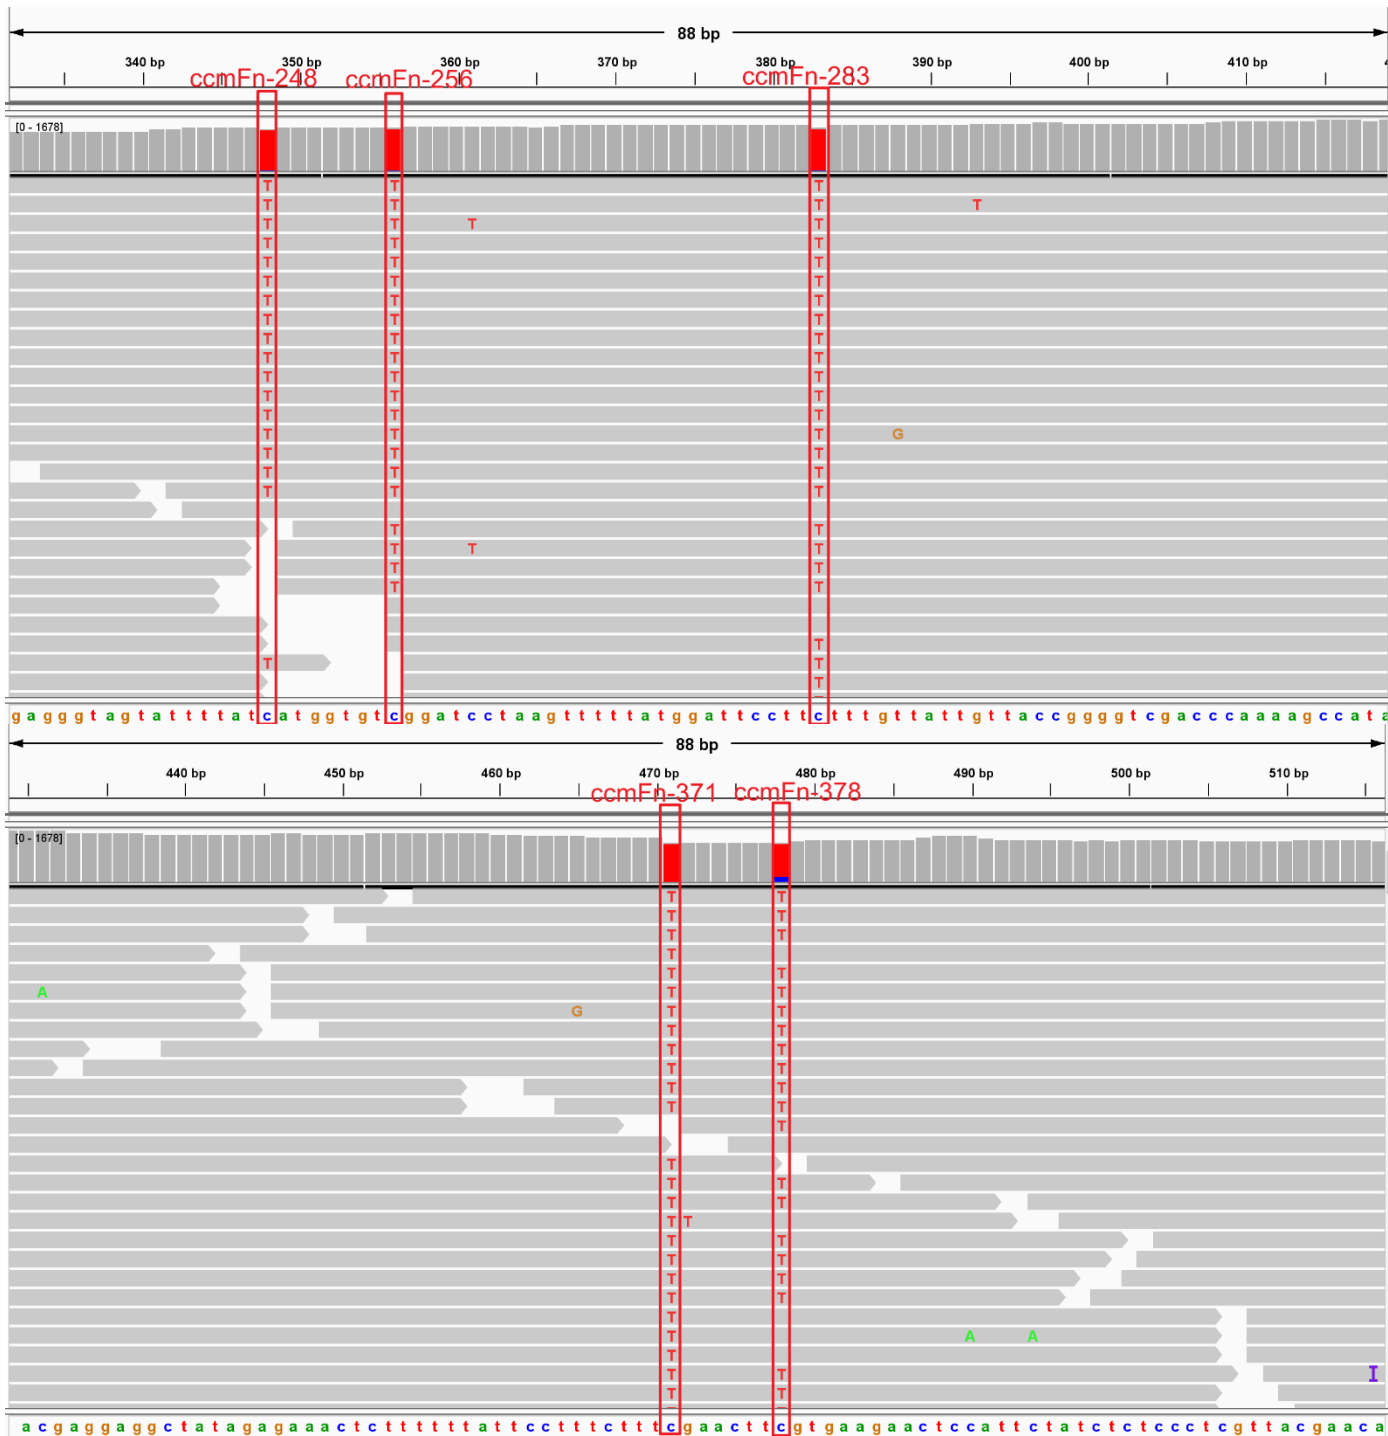

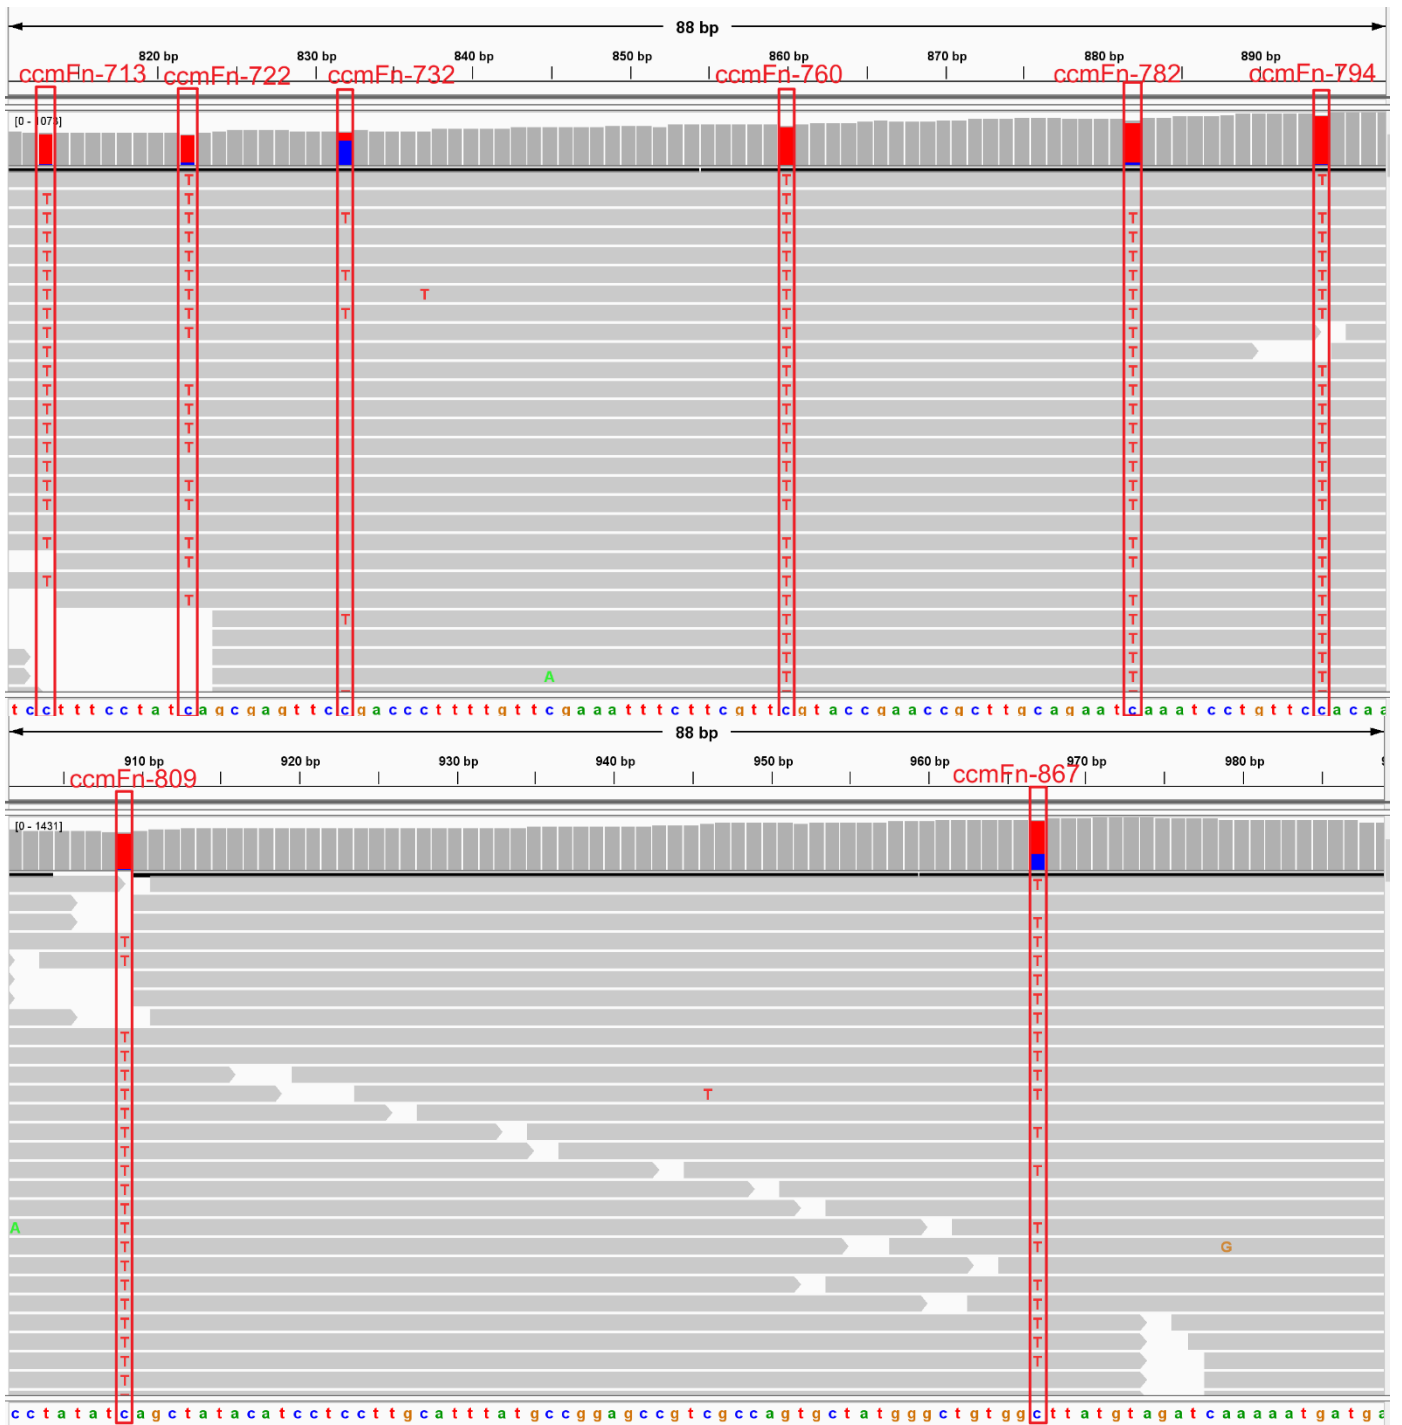

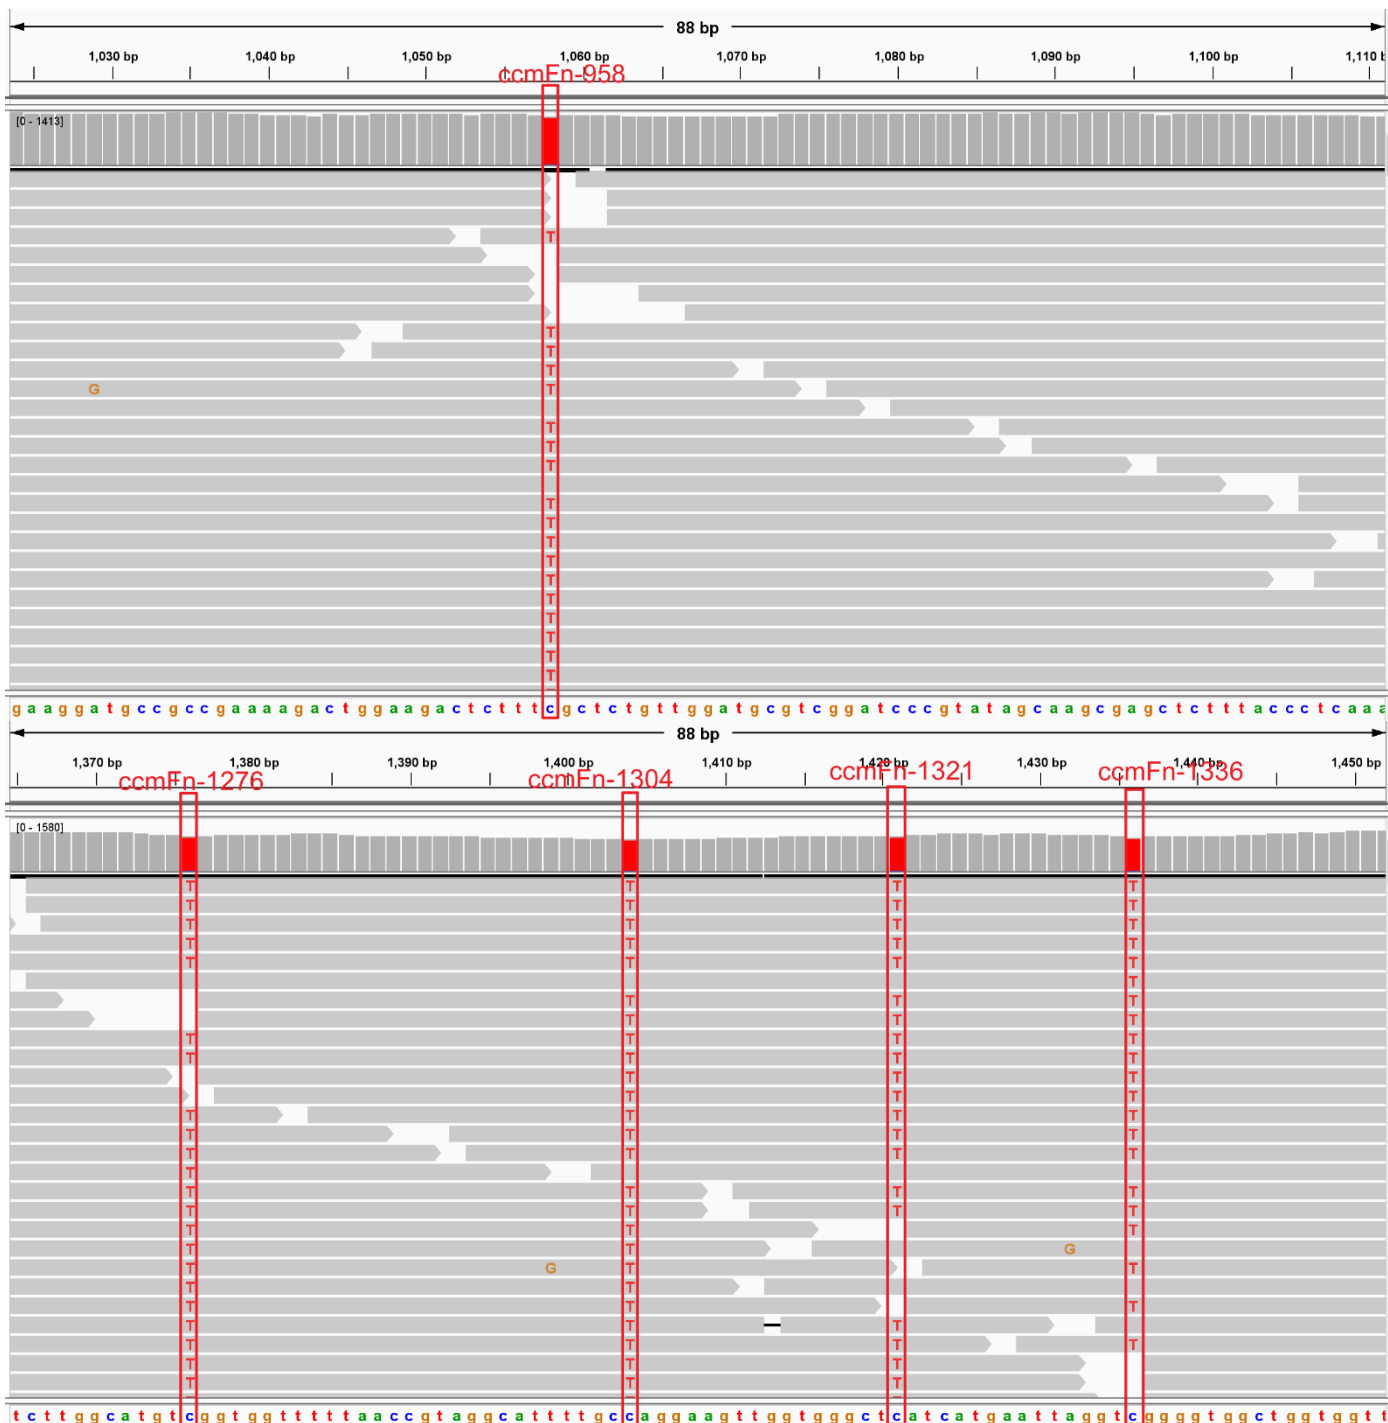

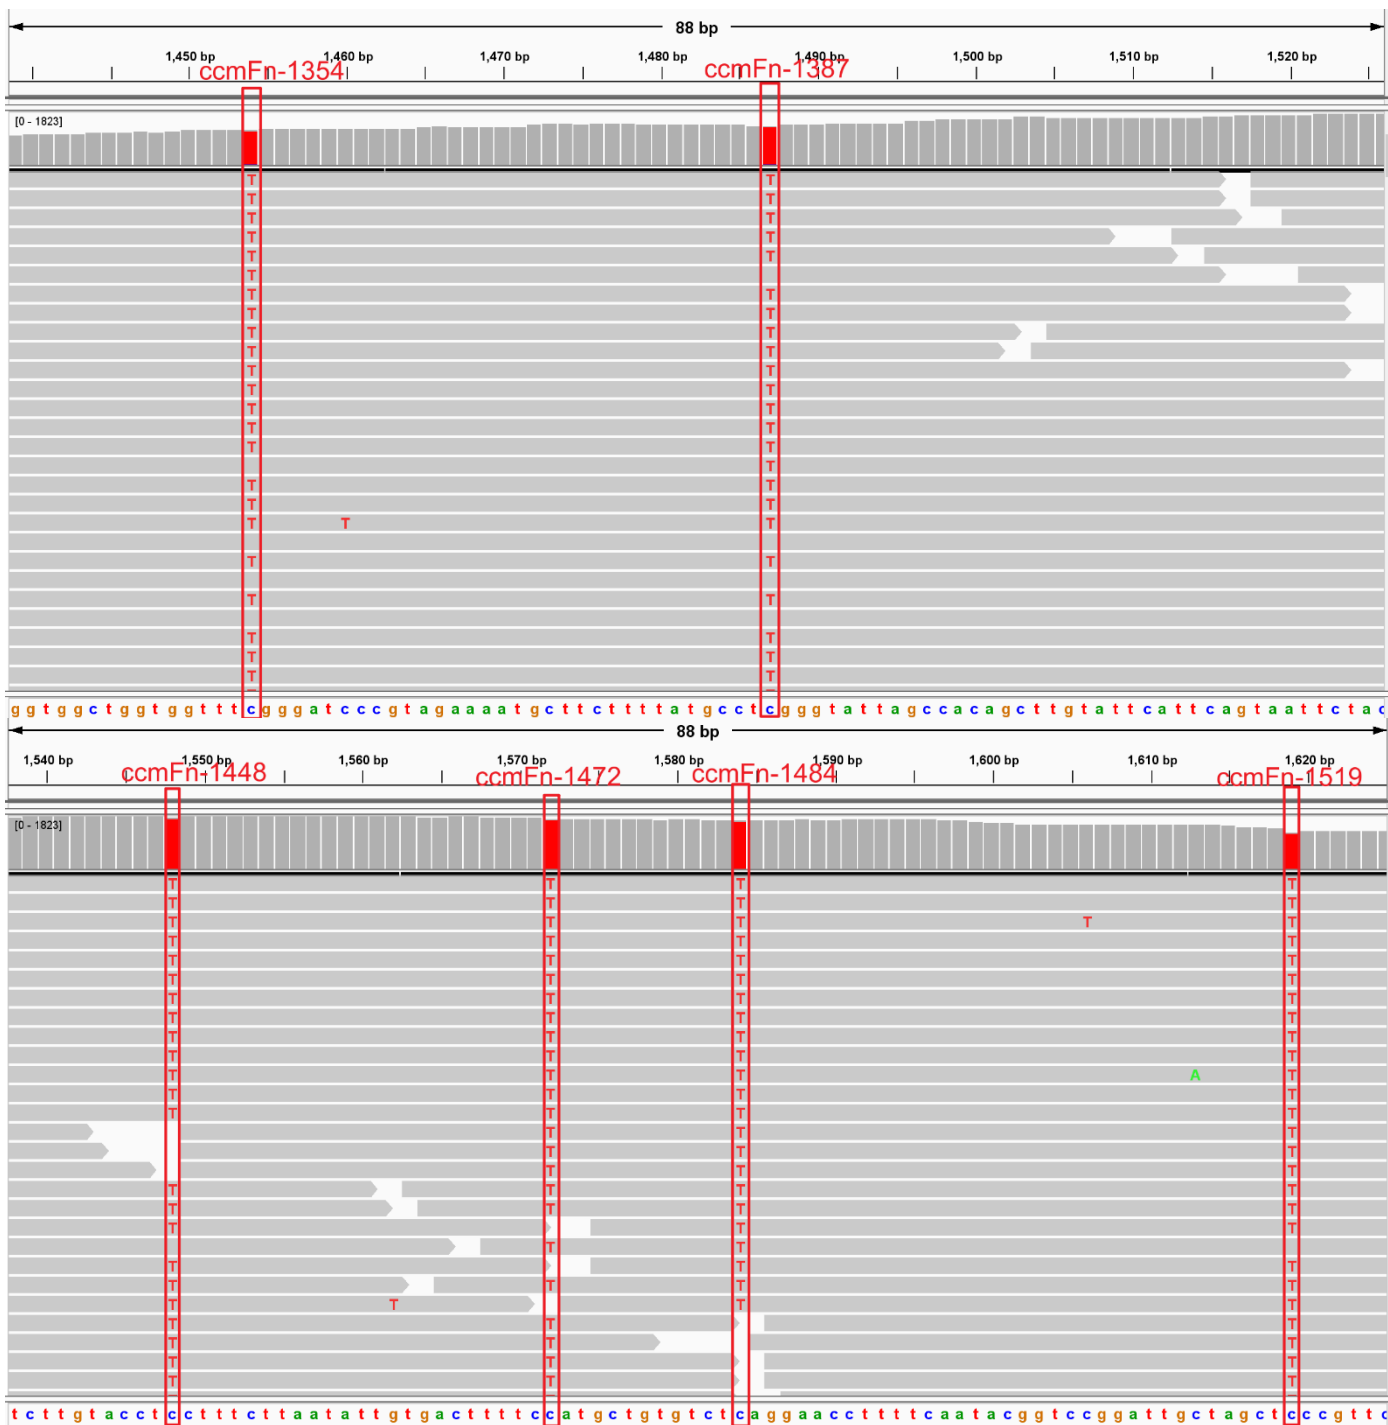

i alignment of RNA-seq reads to the coding sequence of *cob*. 12 RNA-seq editing sites: *cob*-114, 180, 298, 325, 358, 568, 853, 908, 982, 1015, 1084, and 1160 were highlighted in red squares.

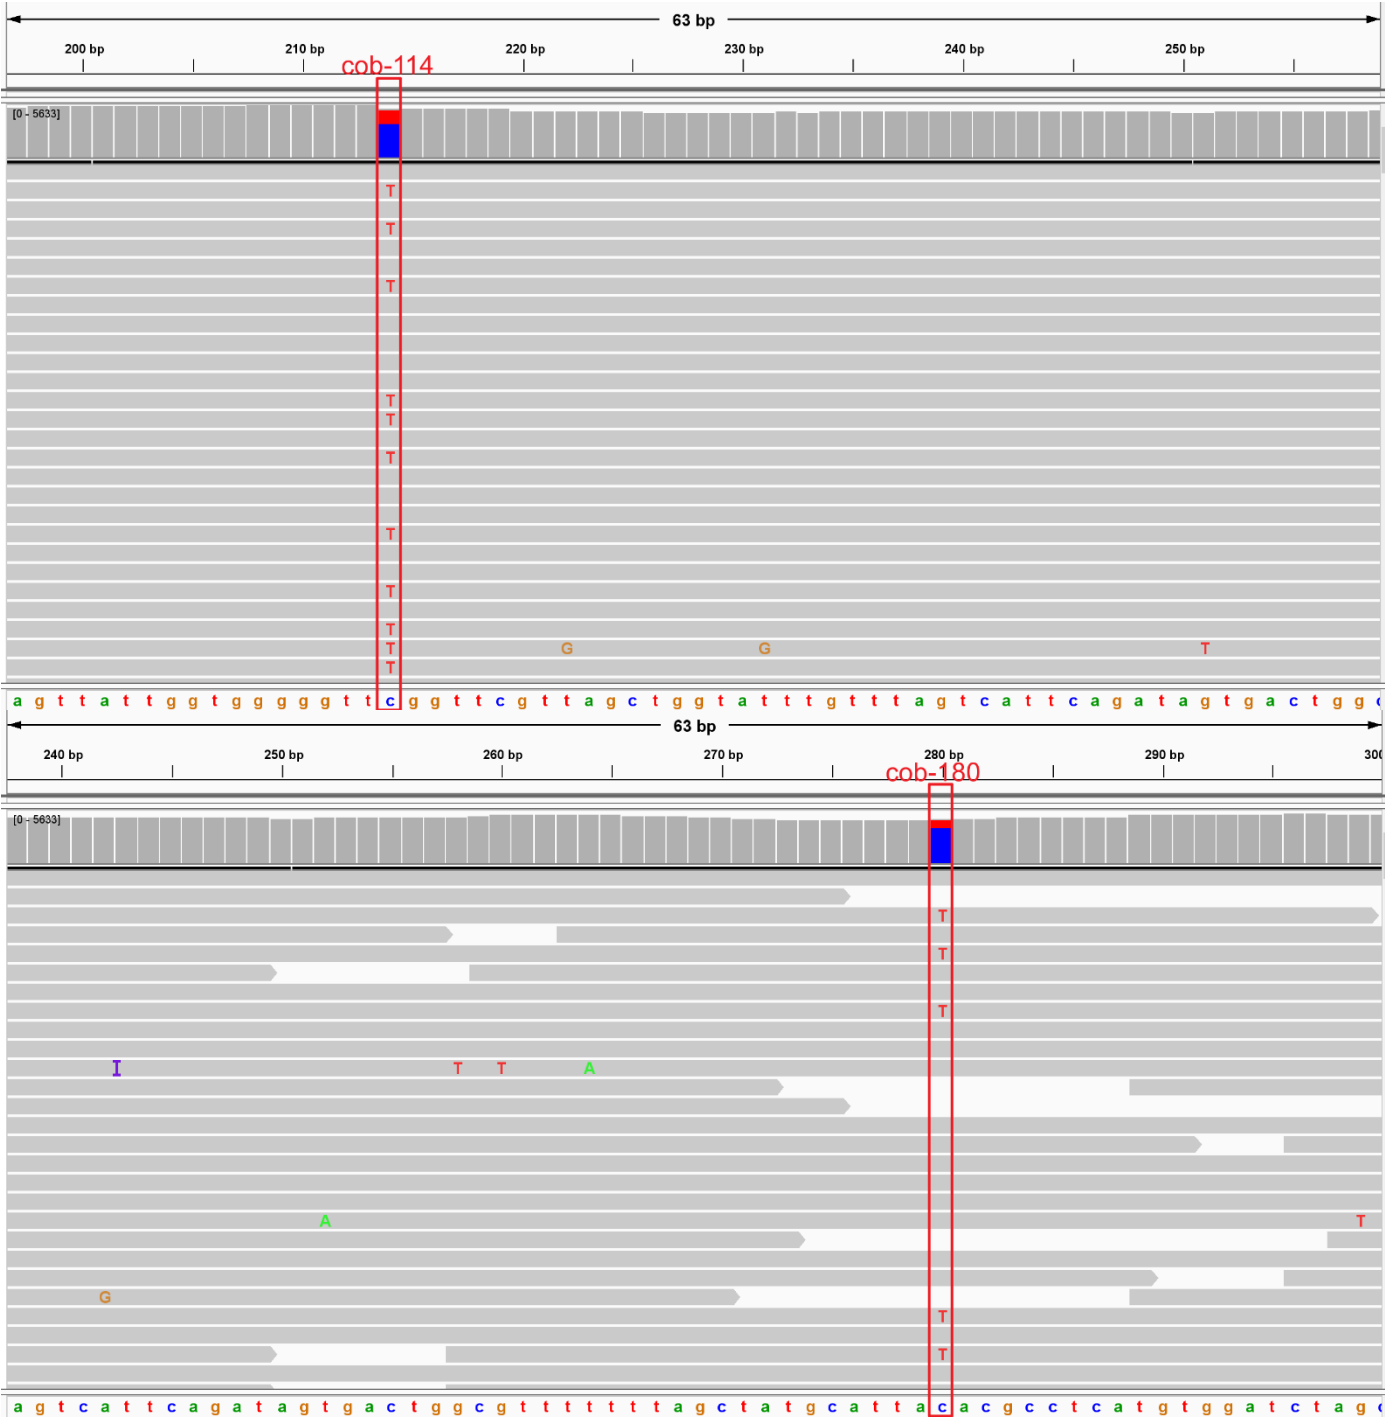

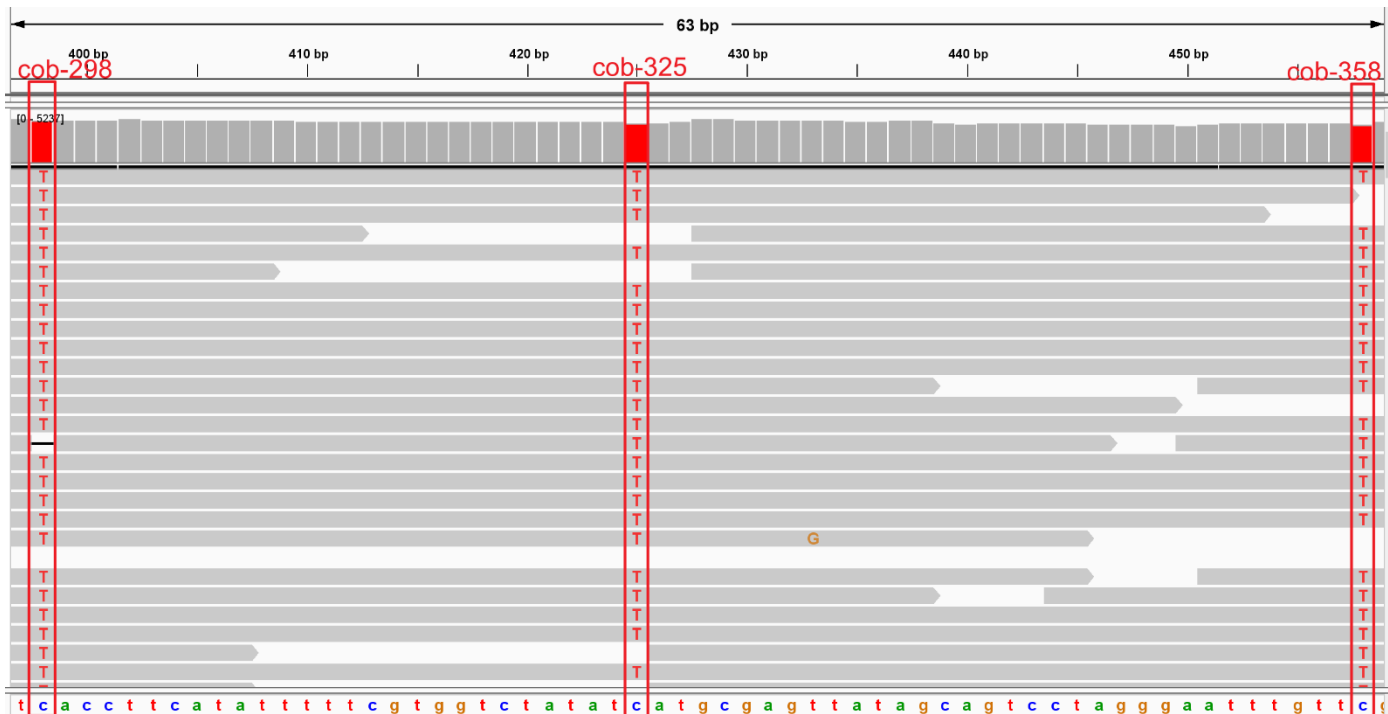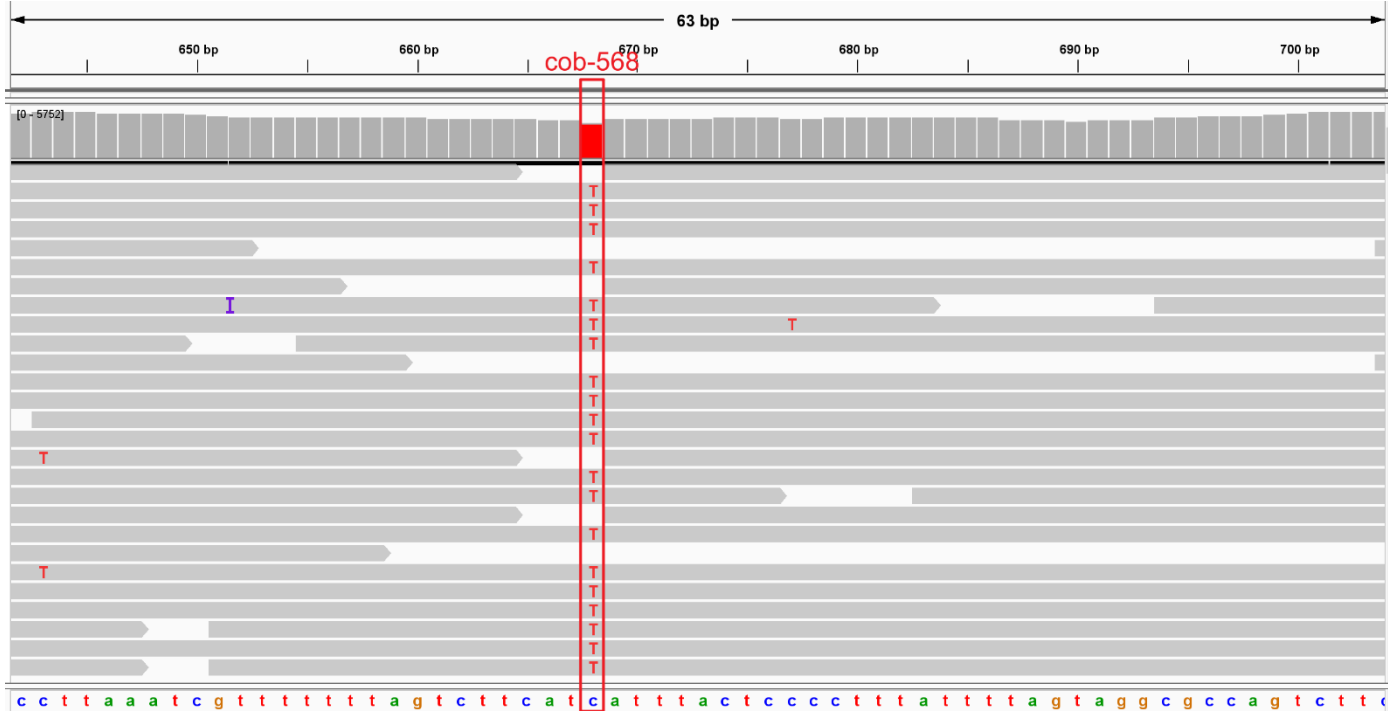

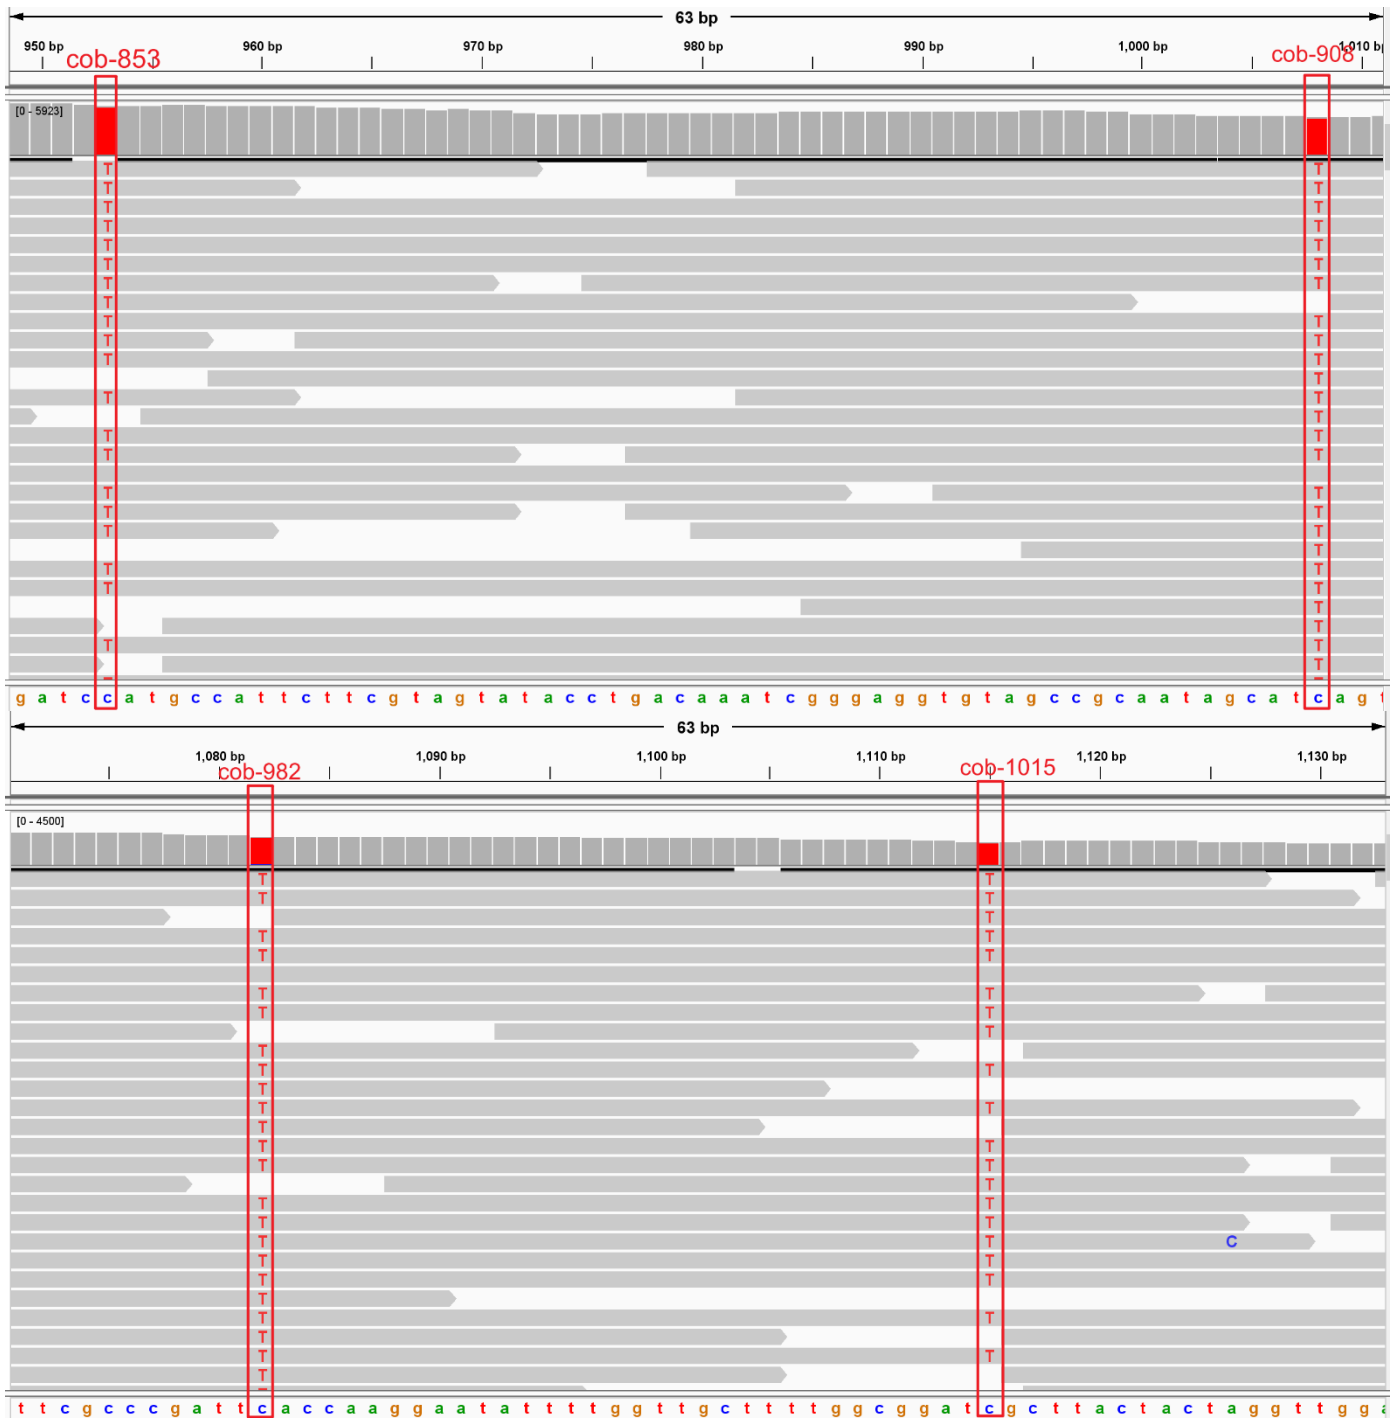

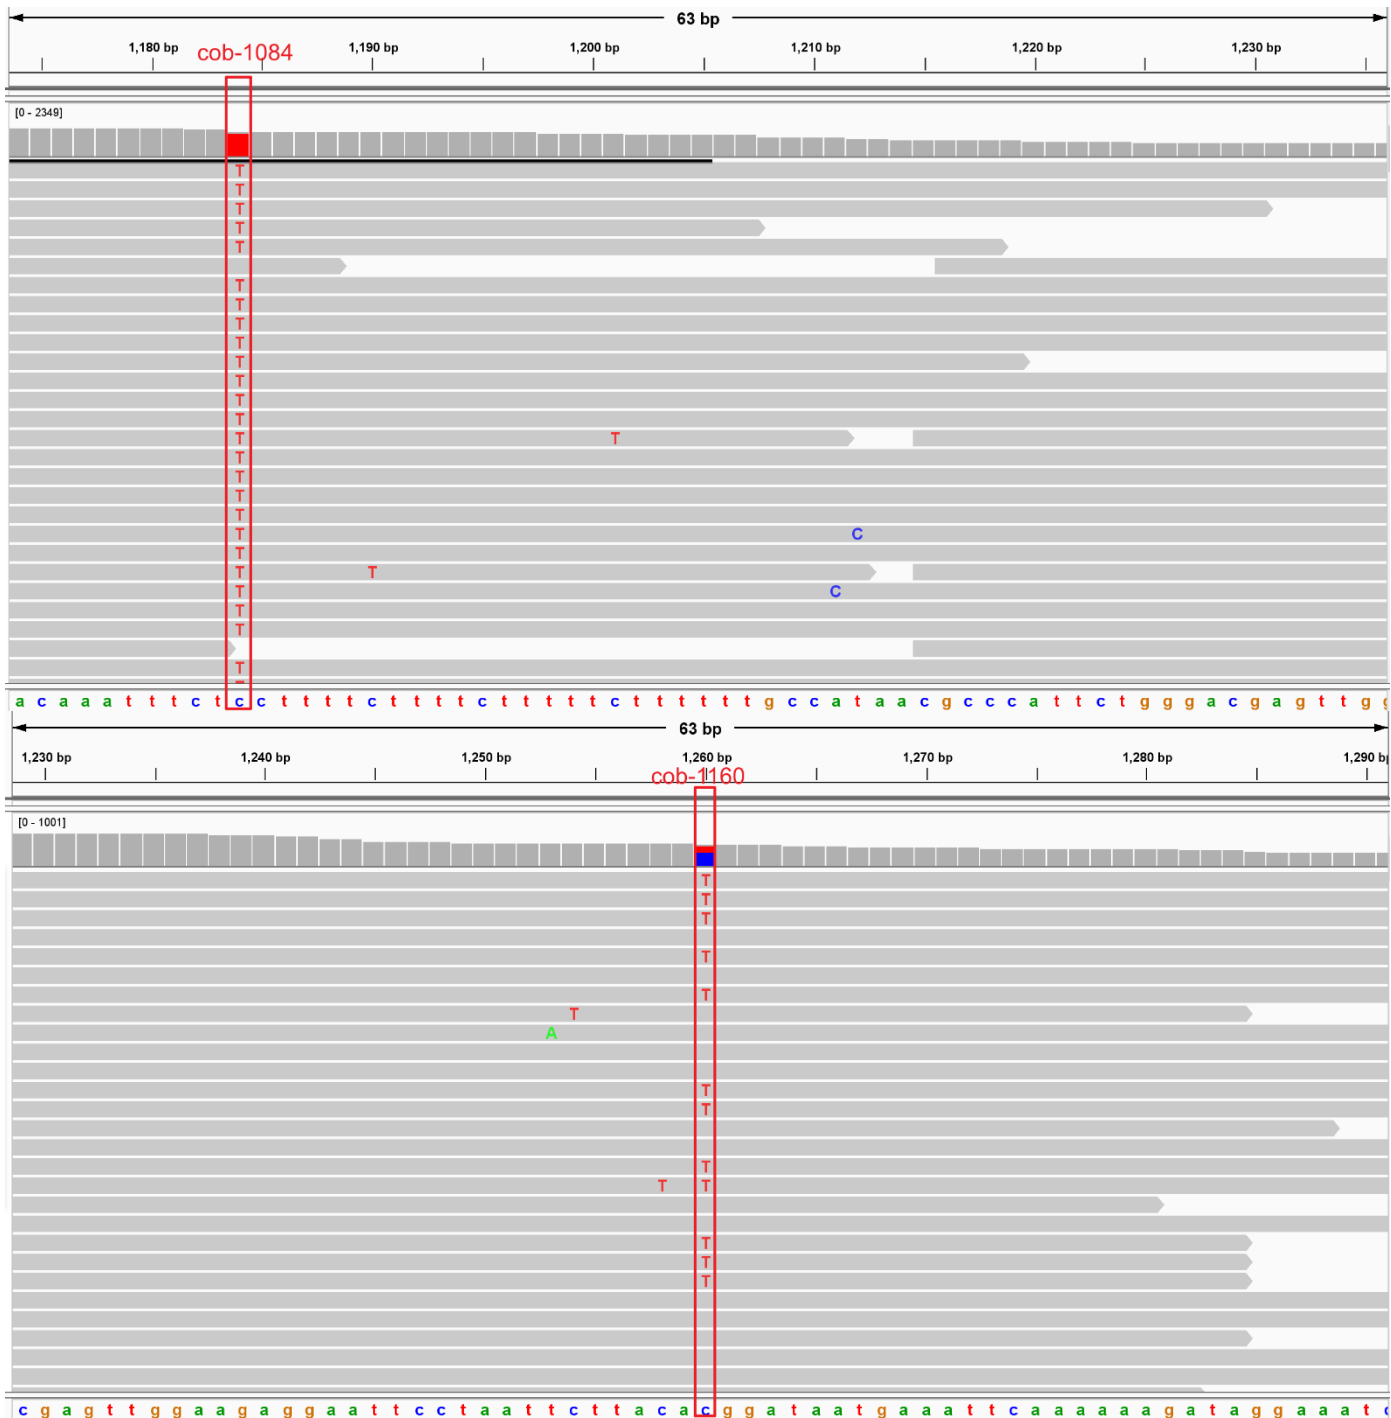



j alignment of RNA-seq reads to the coding sequence of *cox1*. 15 RNA-seq editing sites: *cox1*-242, 254, 452, 515, 551, 590, 715, 761, 1078, 1186, 1405, 1413, 1433, 1489, and 1499 were highlighted in red squares.

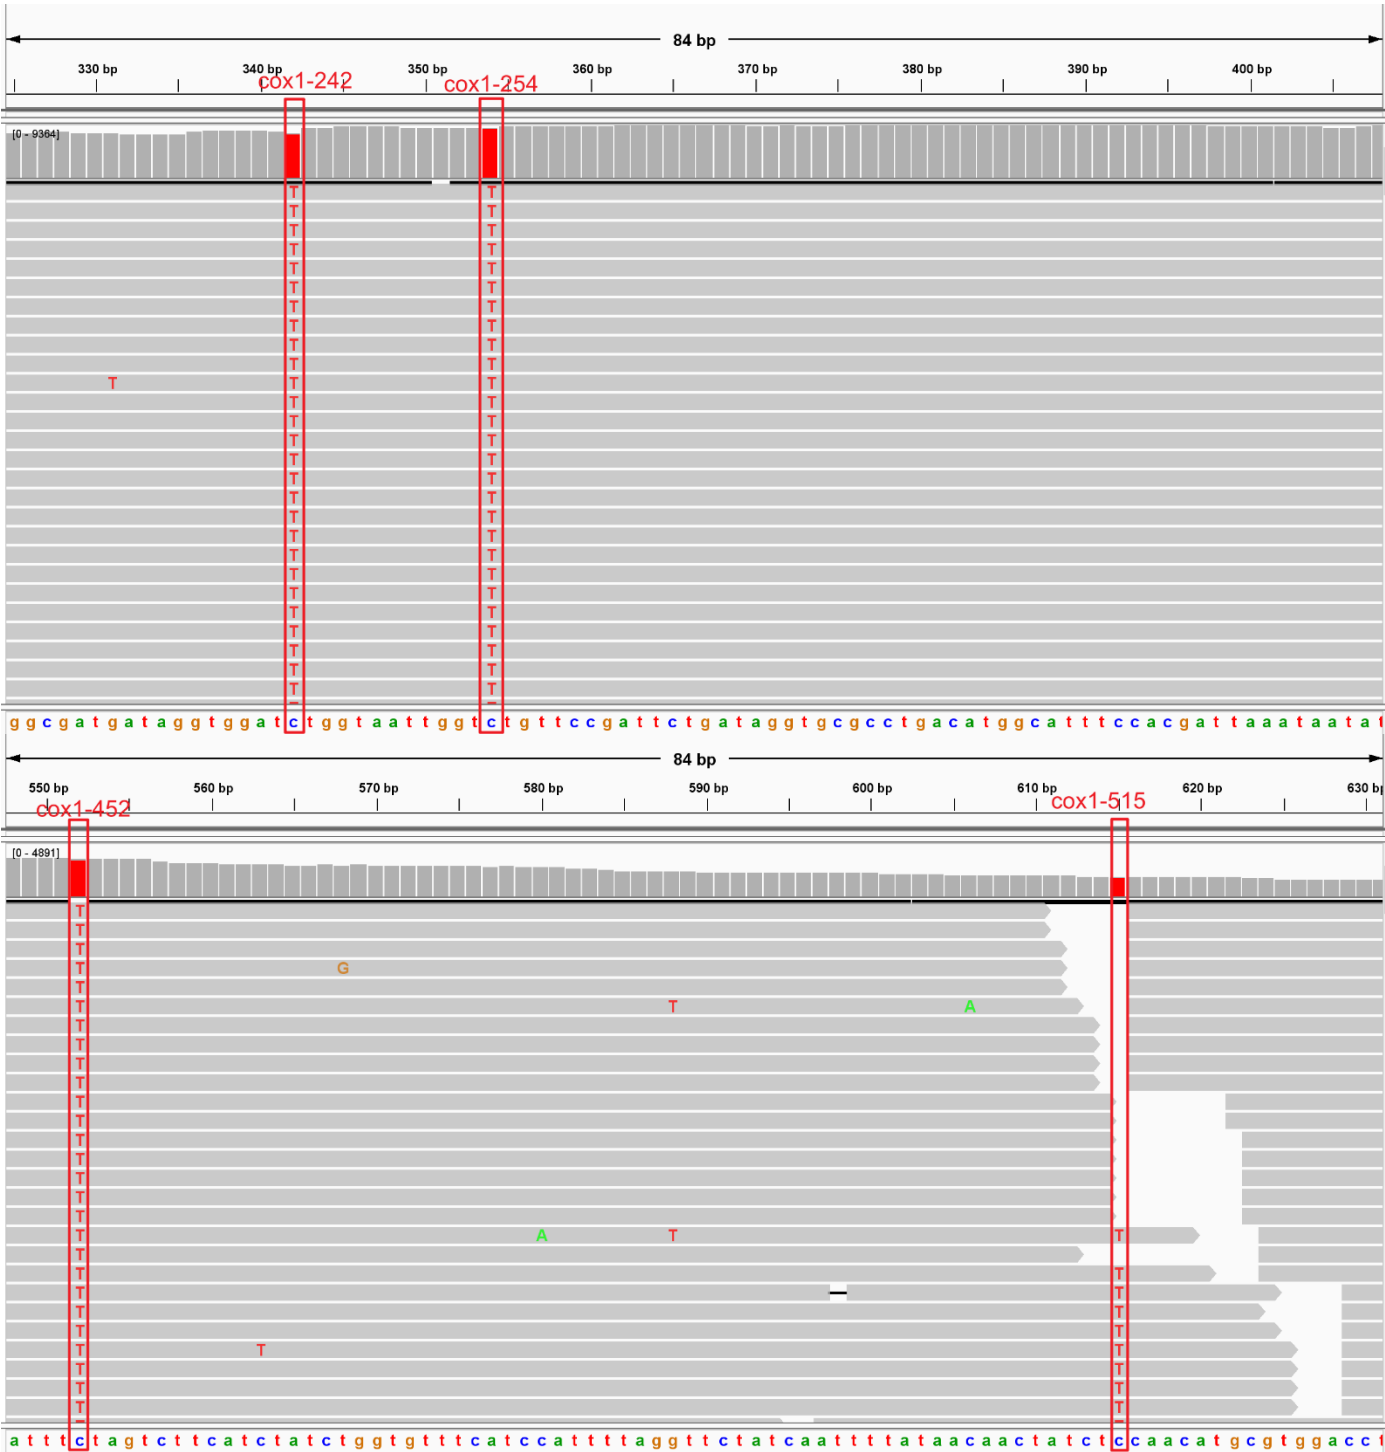

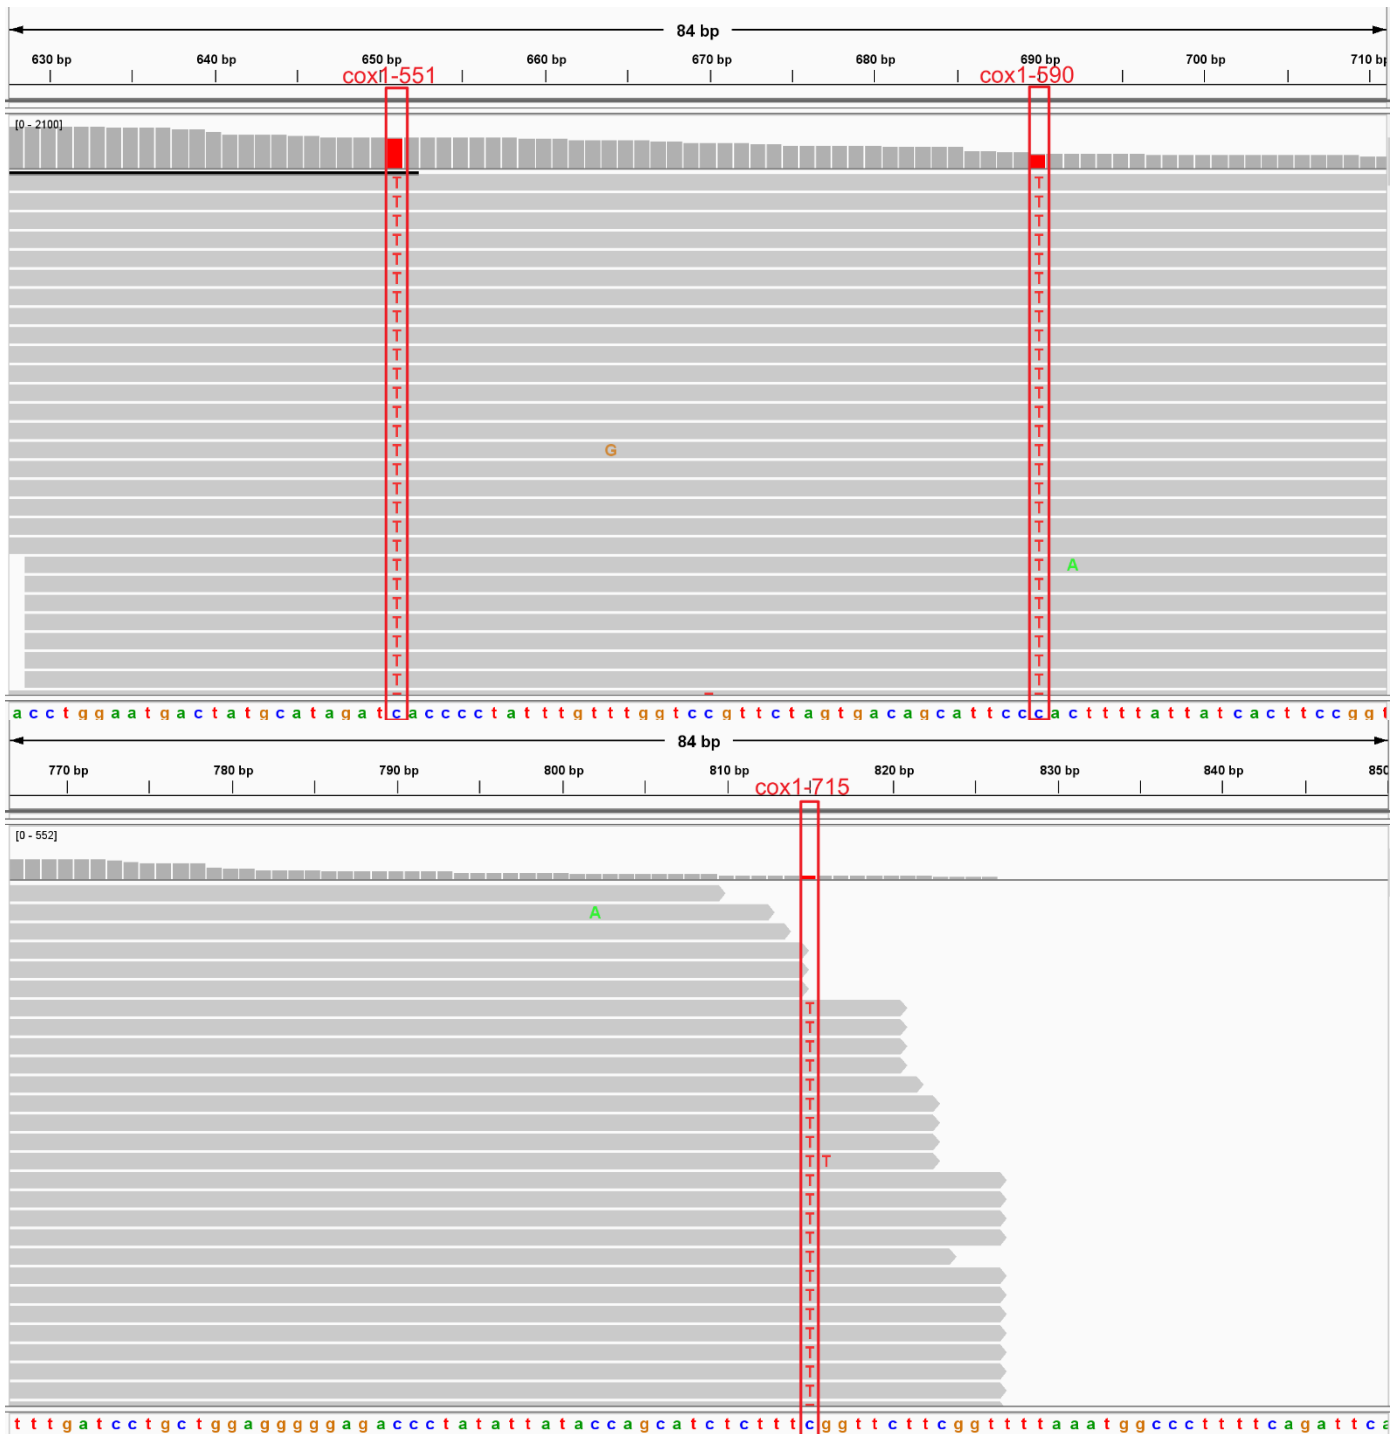



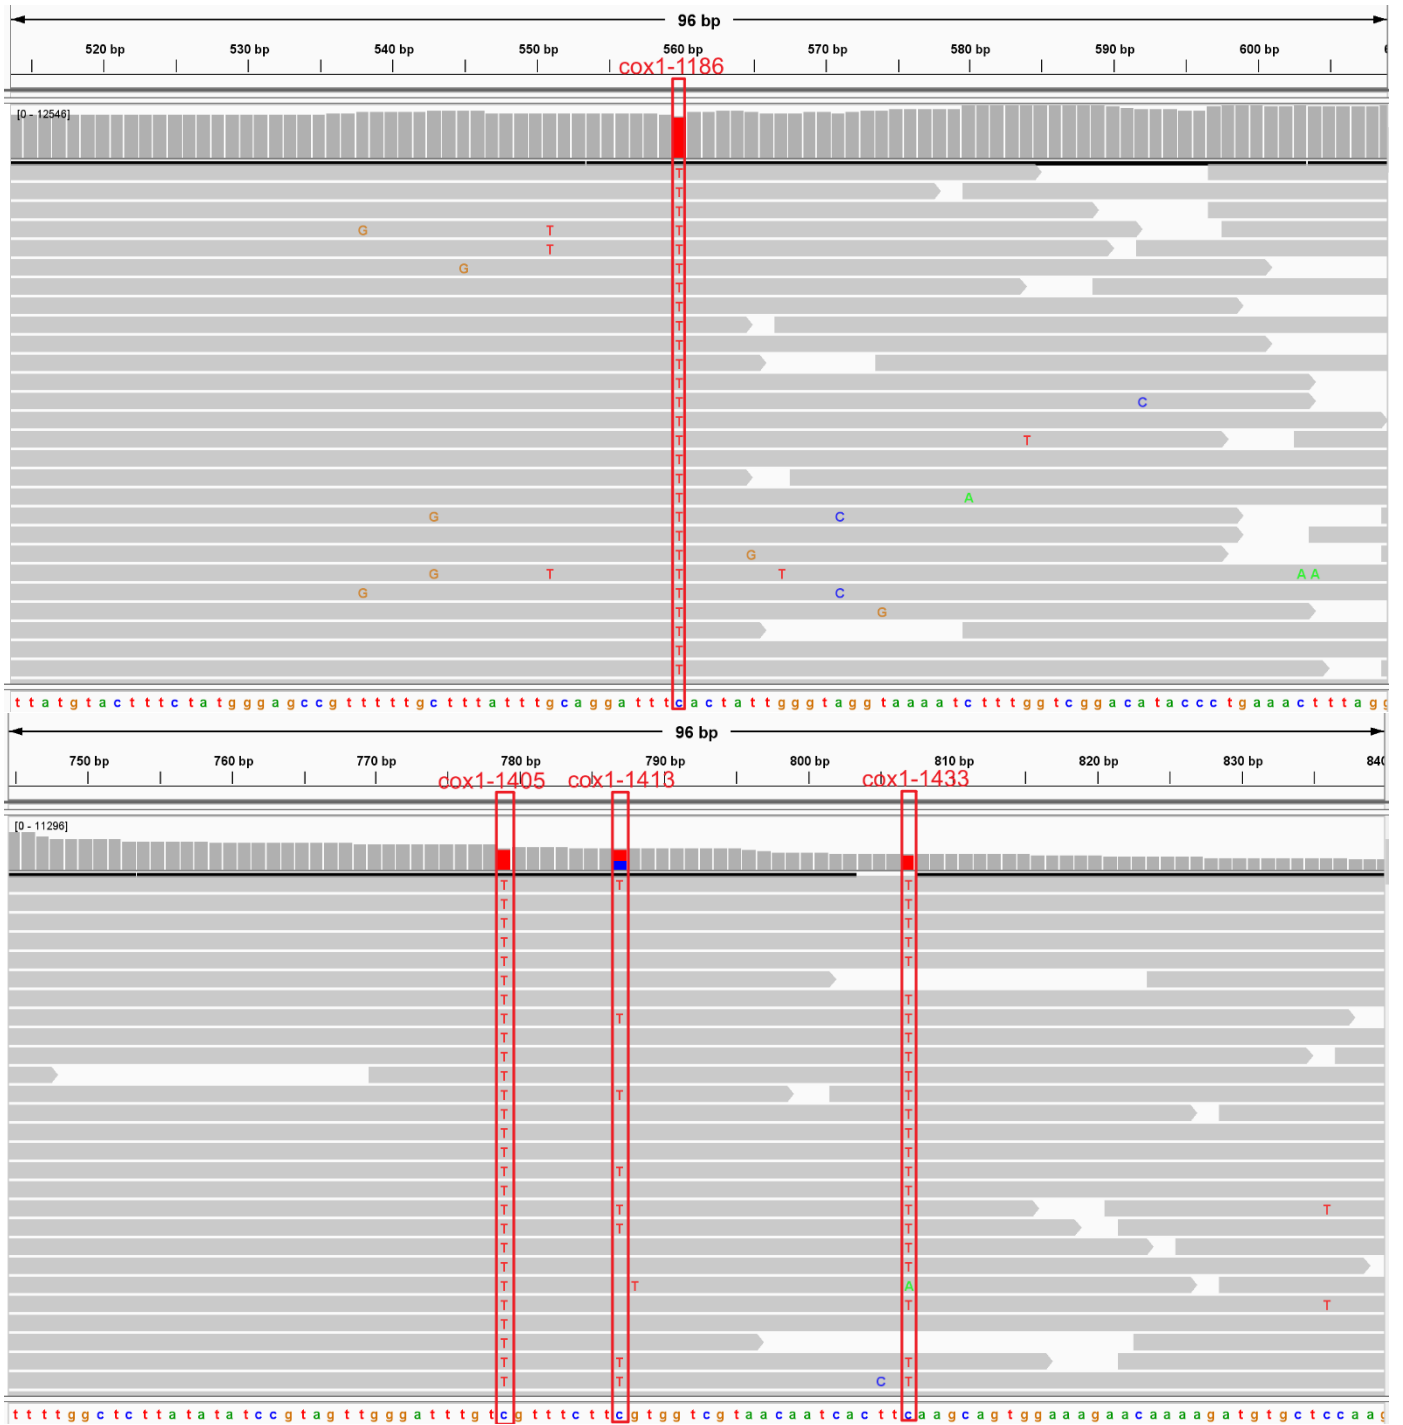

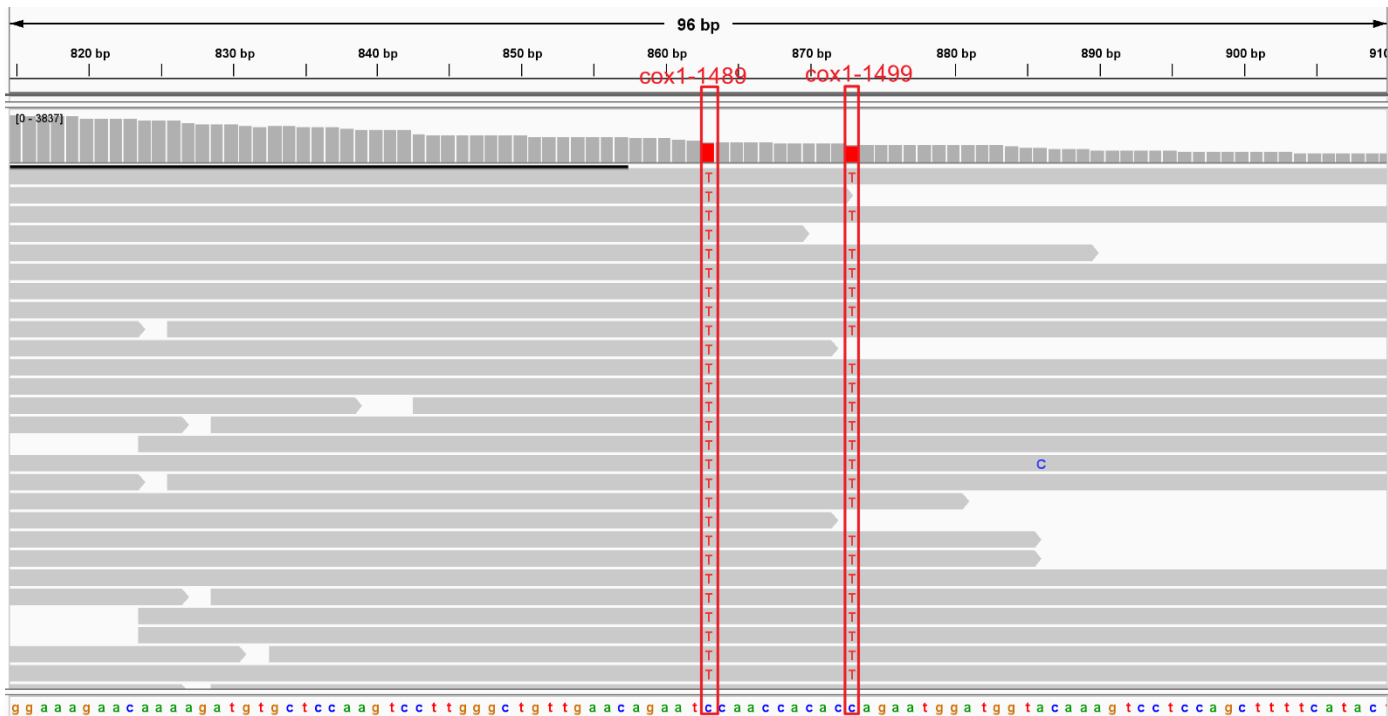

k alignment of RNA-seq reads to the coding sequence of *cox2*. 10 RNA-seq editing sites: *cox2*-47, 419, 437, 452, 520, 533, 595, 608, 697, and 718 were highlighted in red squares.

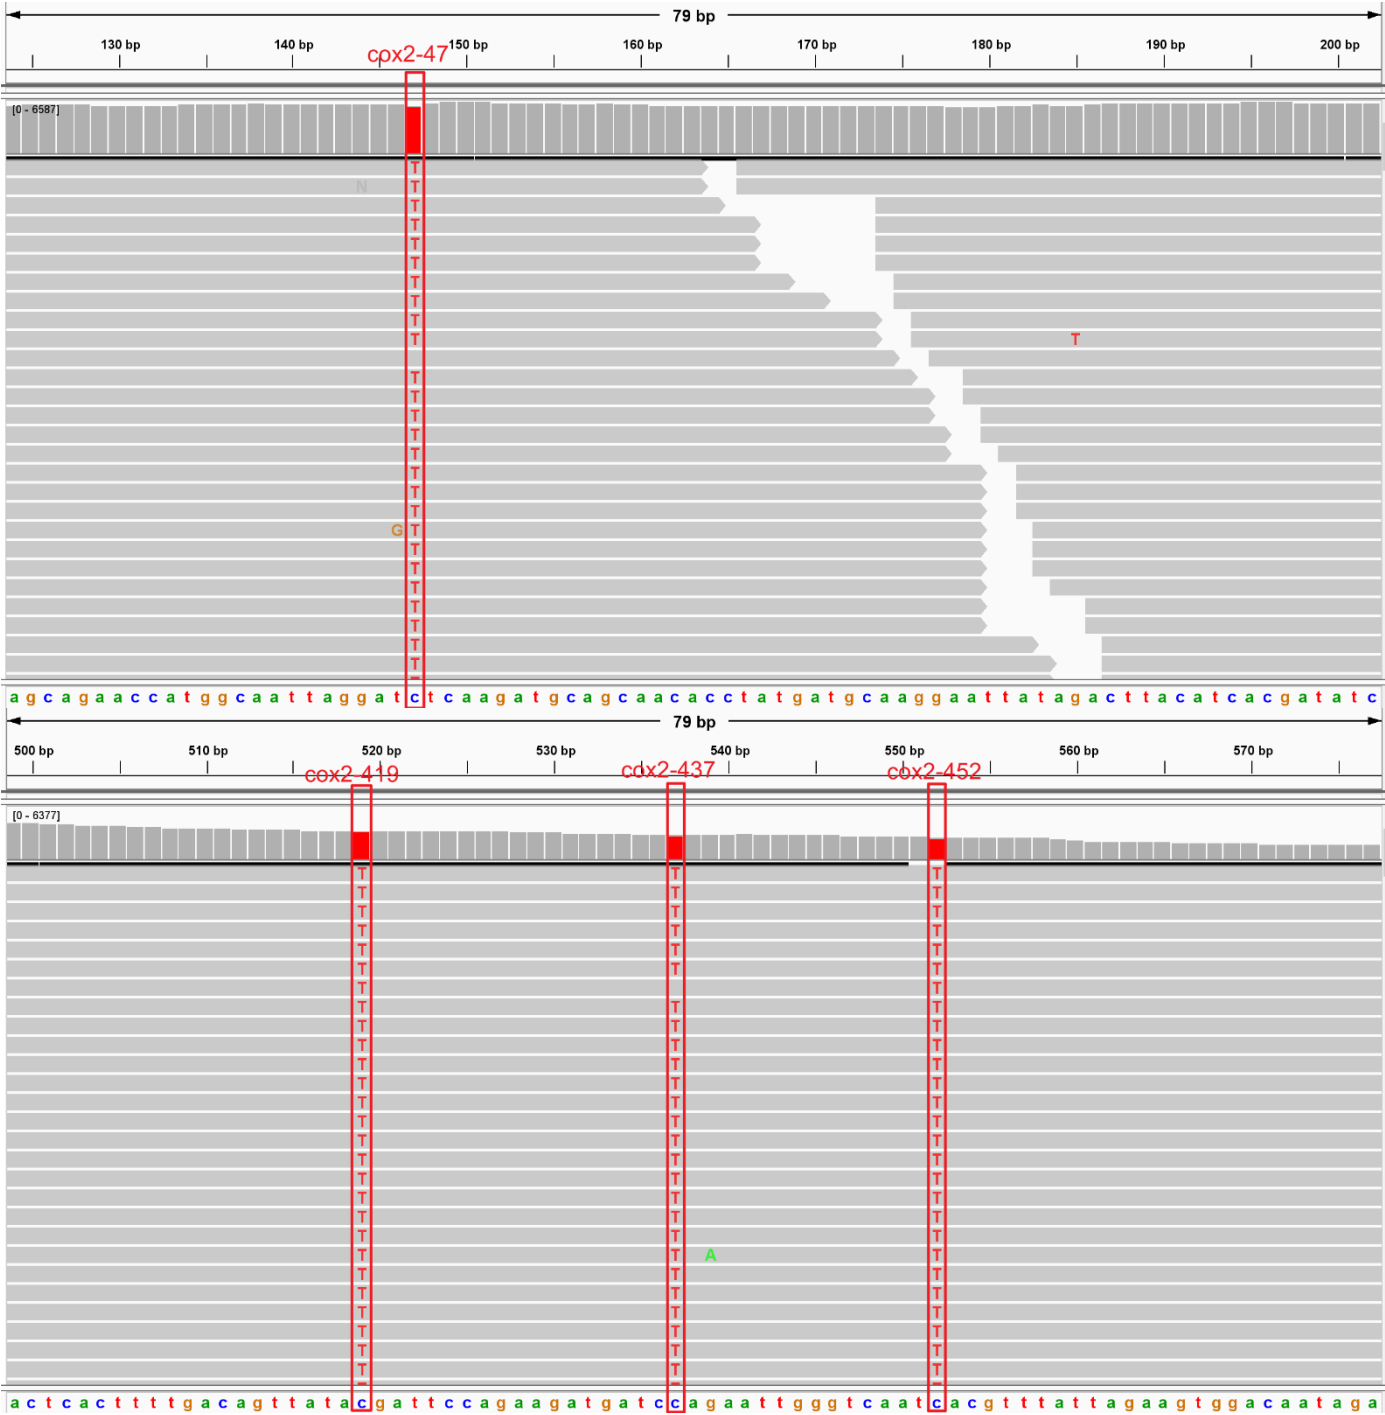

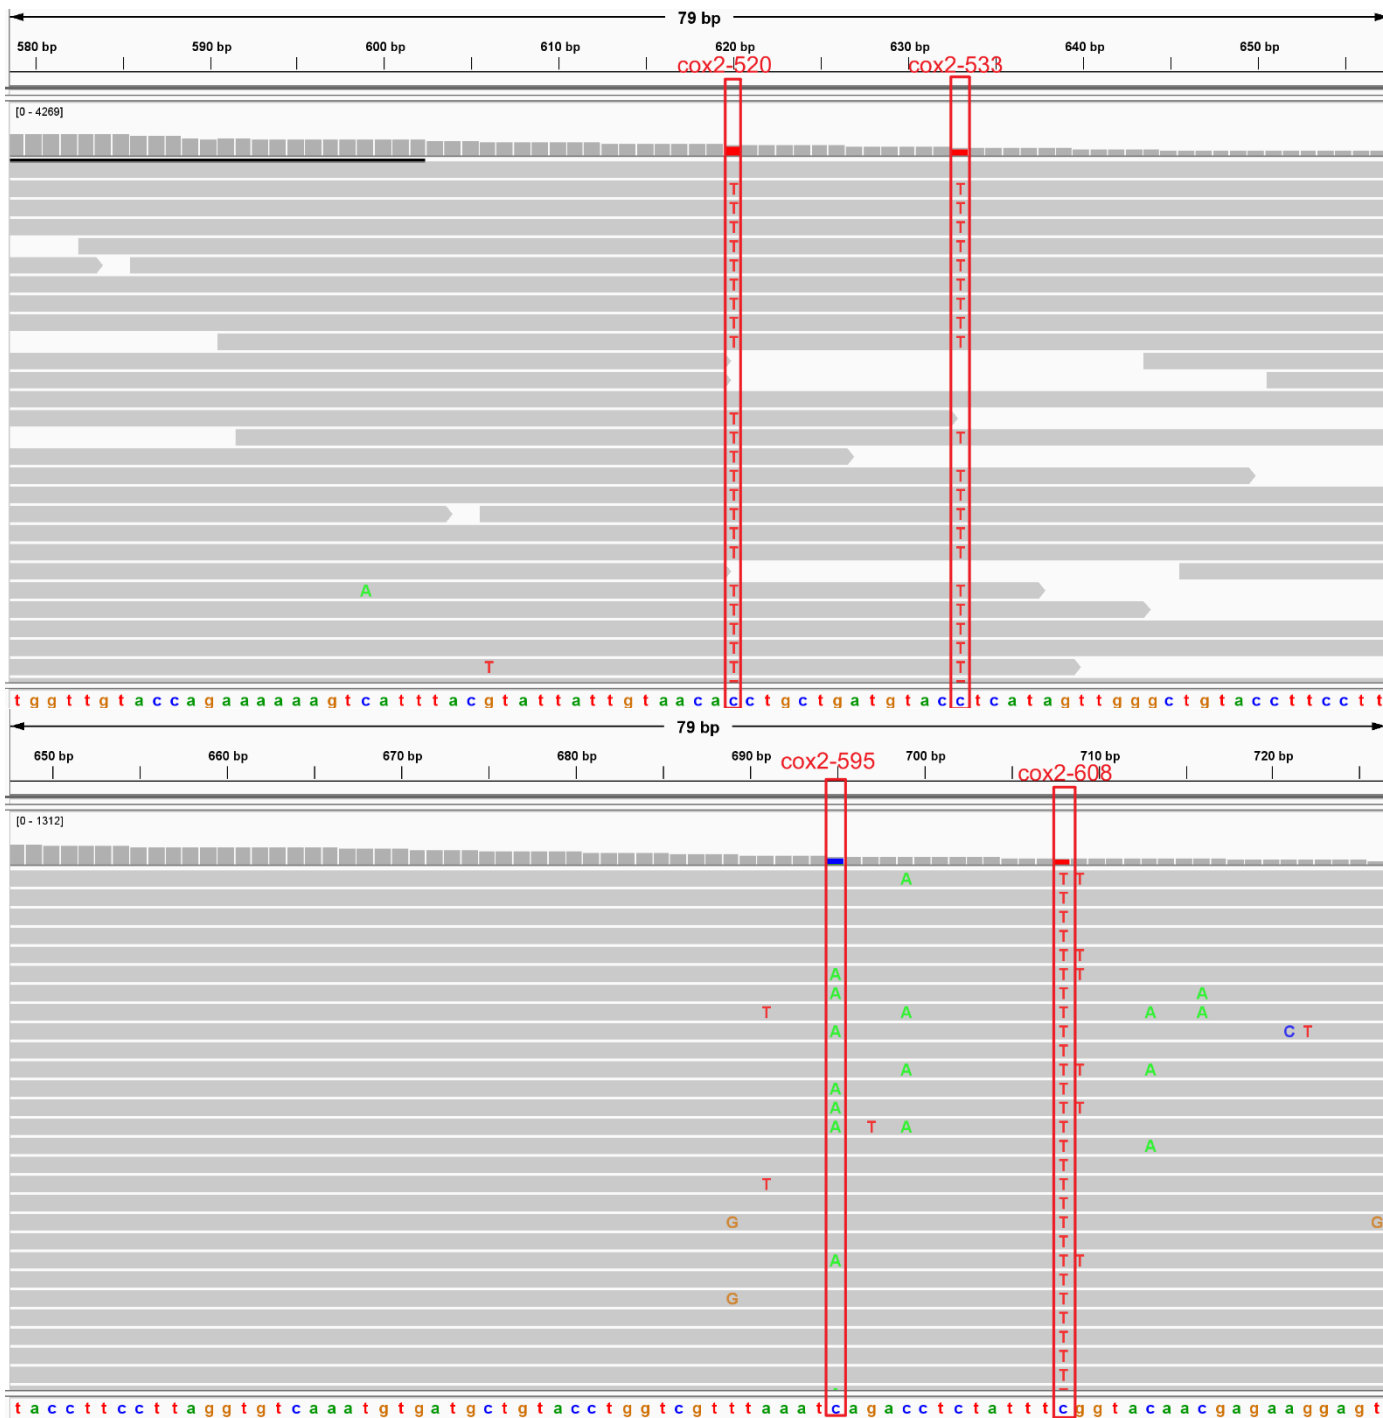

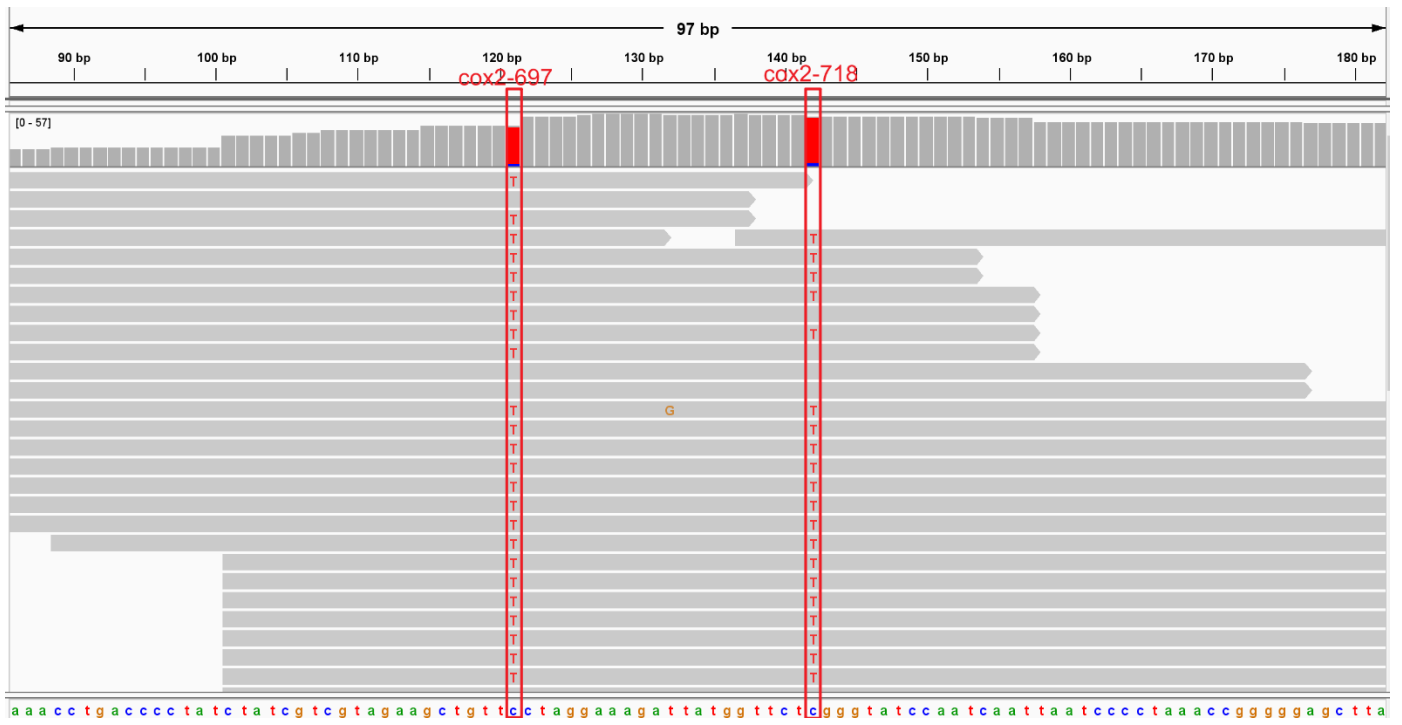



Alignment of RNA-seq reads to the coding sequence of *cox3*. 11 RNA-seq editing sites: *cox3*-174, 245, 304, 311, 314, 419, 422, 566, 567, 754, and 764 were highlighted in red squares.

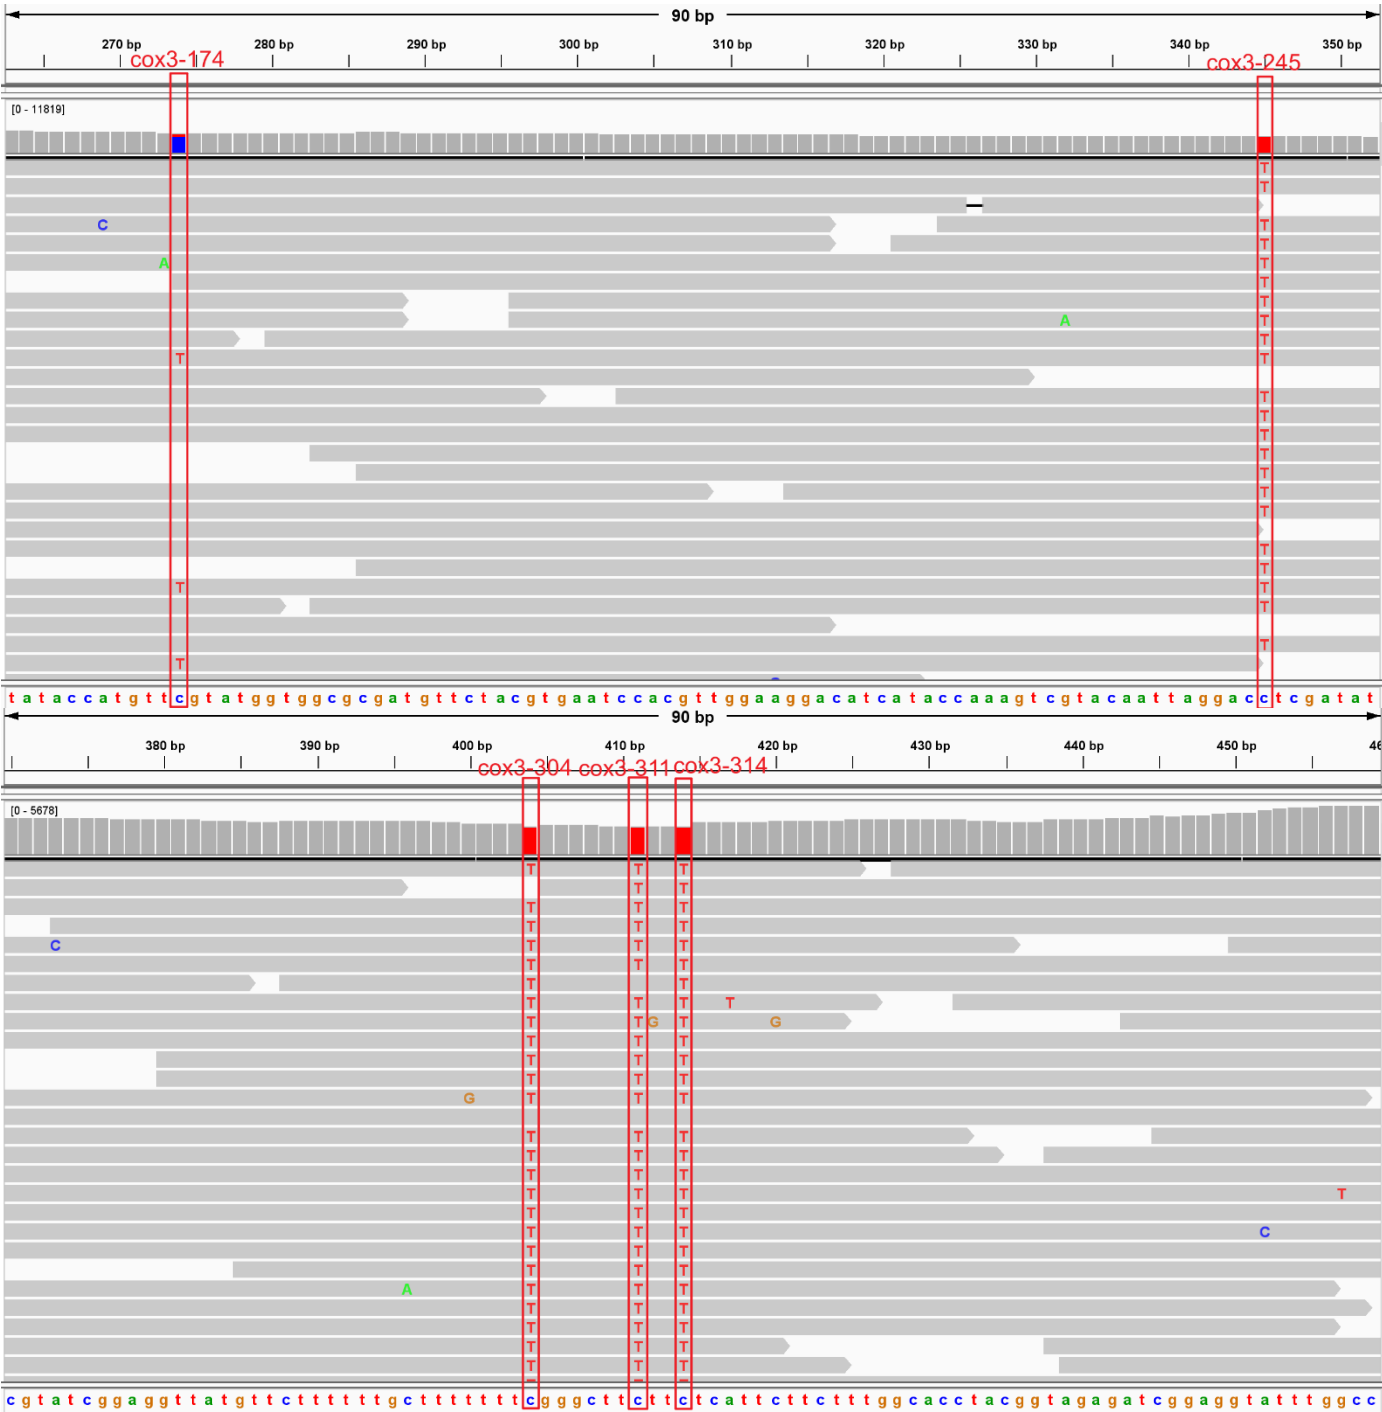

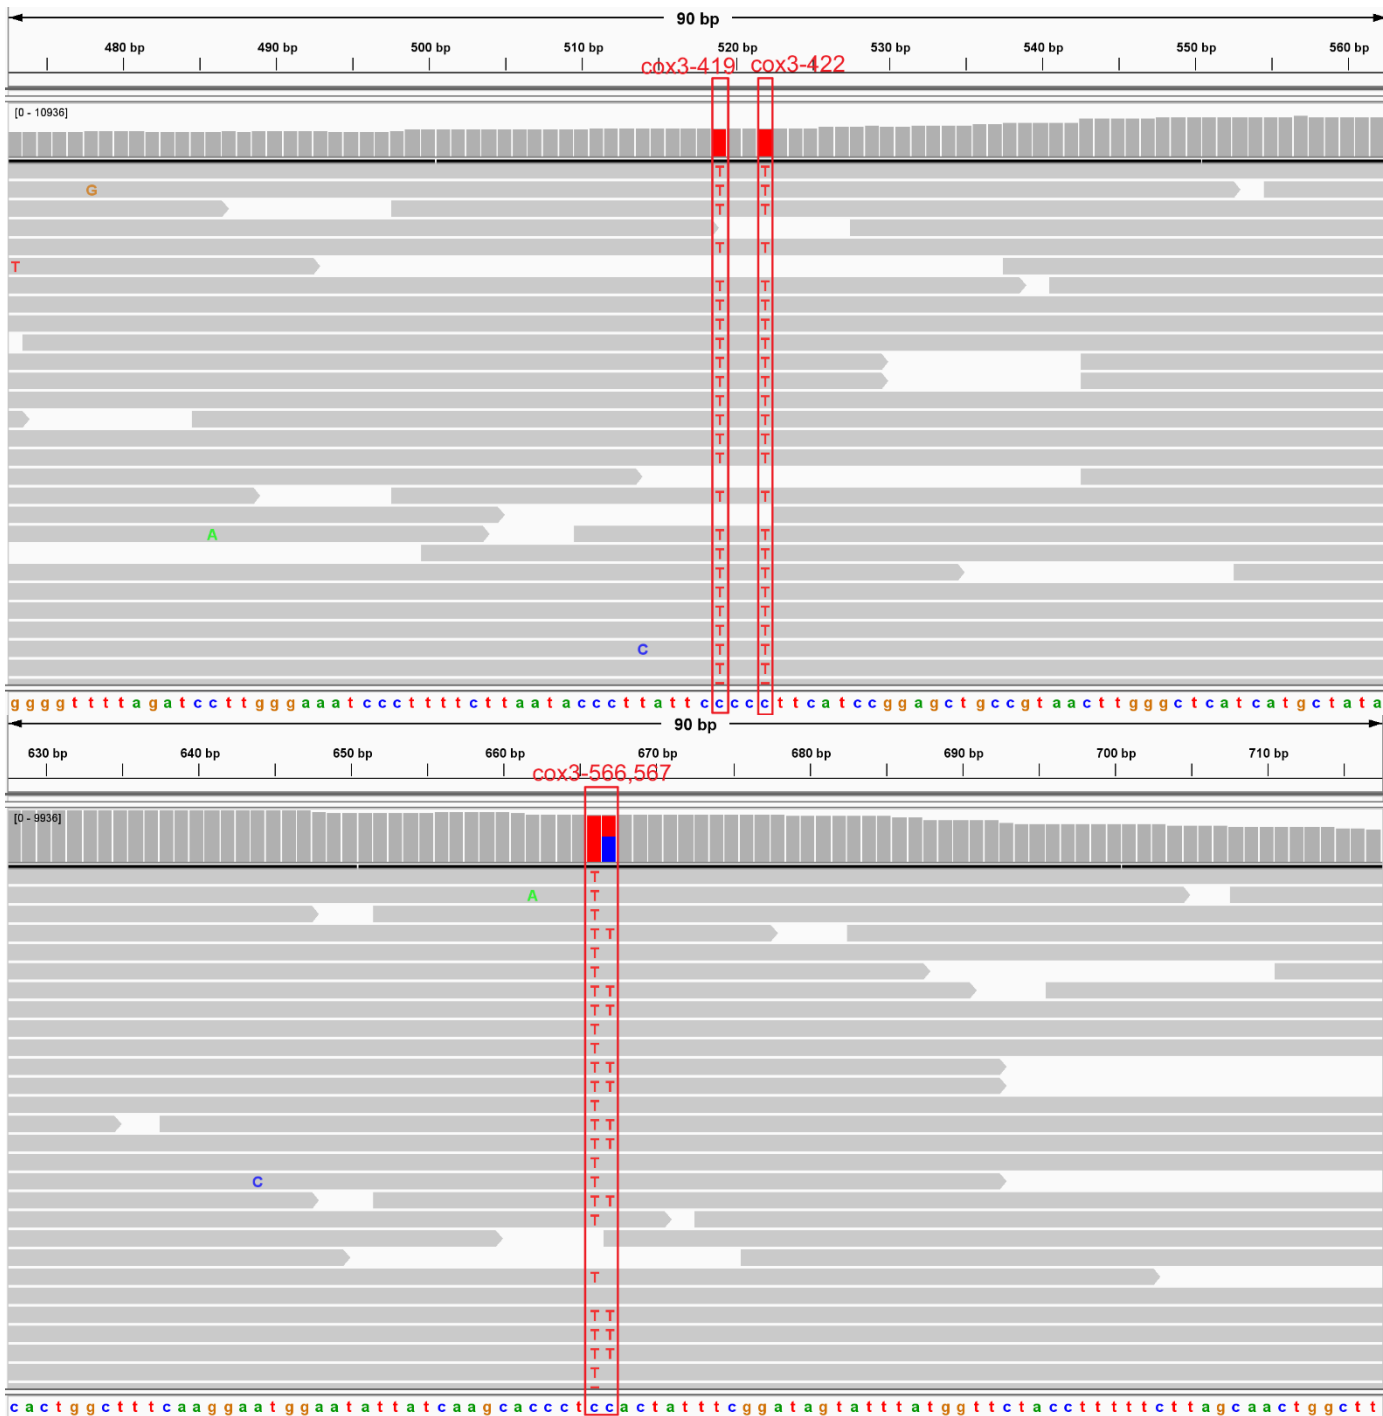

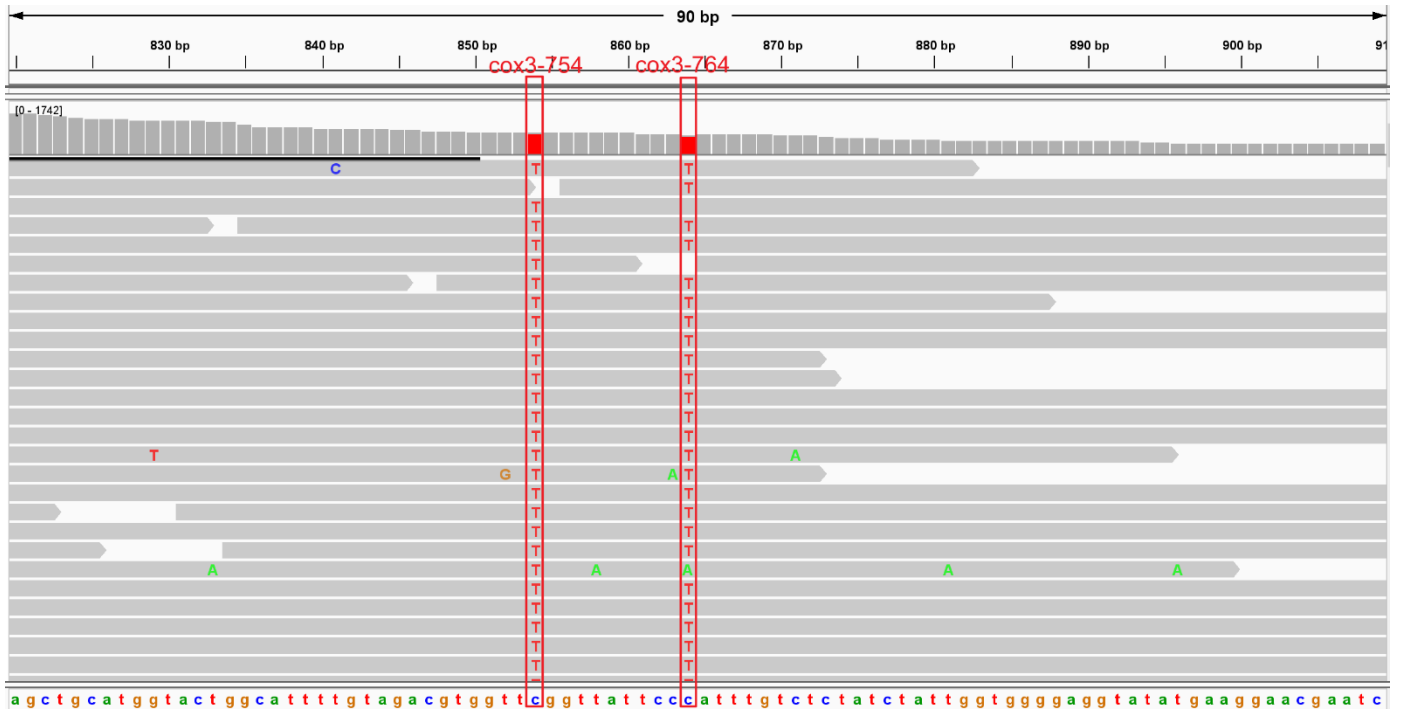

m alignment of RNA-seq reads to the coding sequence of *matR*. 18 RNA-seq editing sites: *matR*-32, 43, 237, 254, 258, 326, 413, 1400, 1522, 1524, 1658, 1679, 1699, 1713, 1735, 1766, 1805, and 1823 were highlighted in red squares.

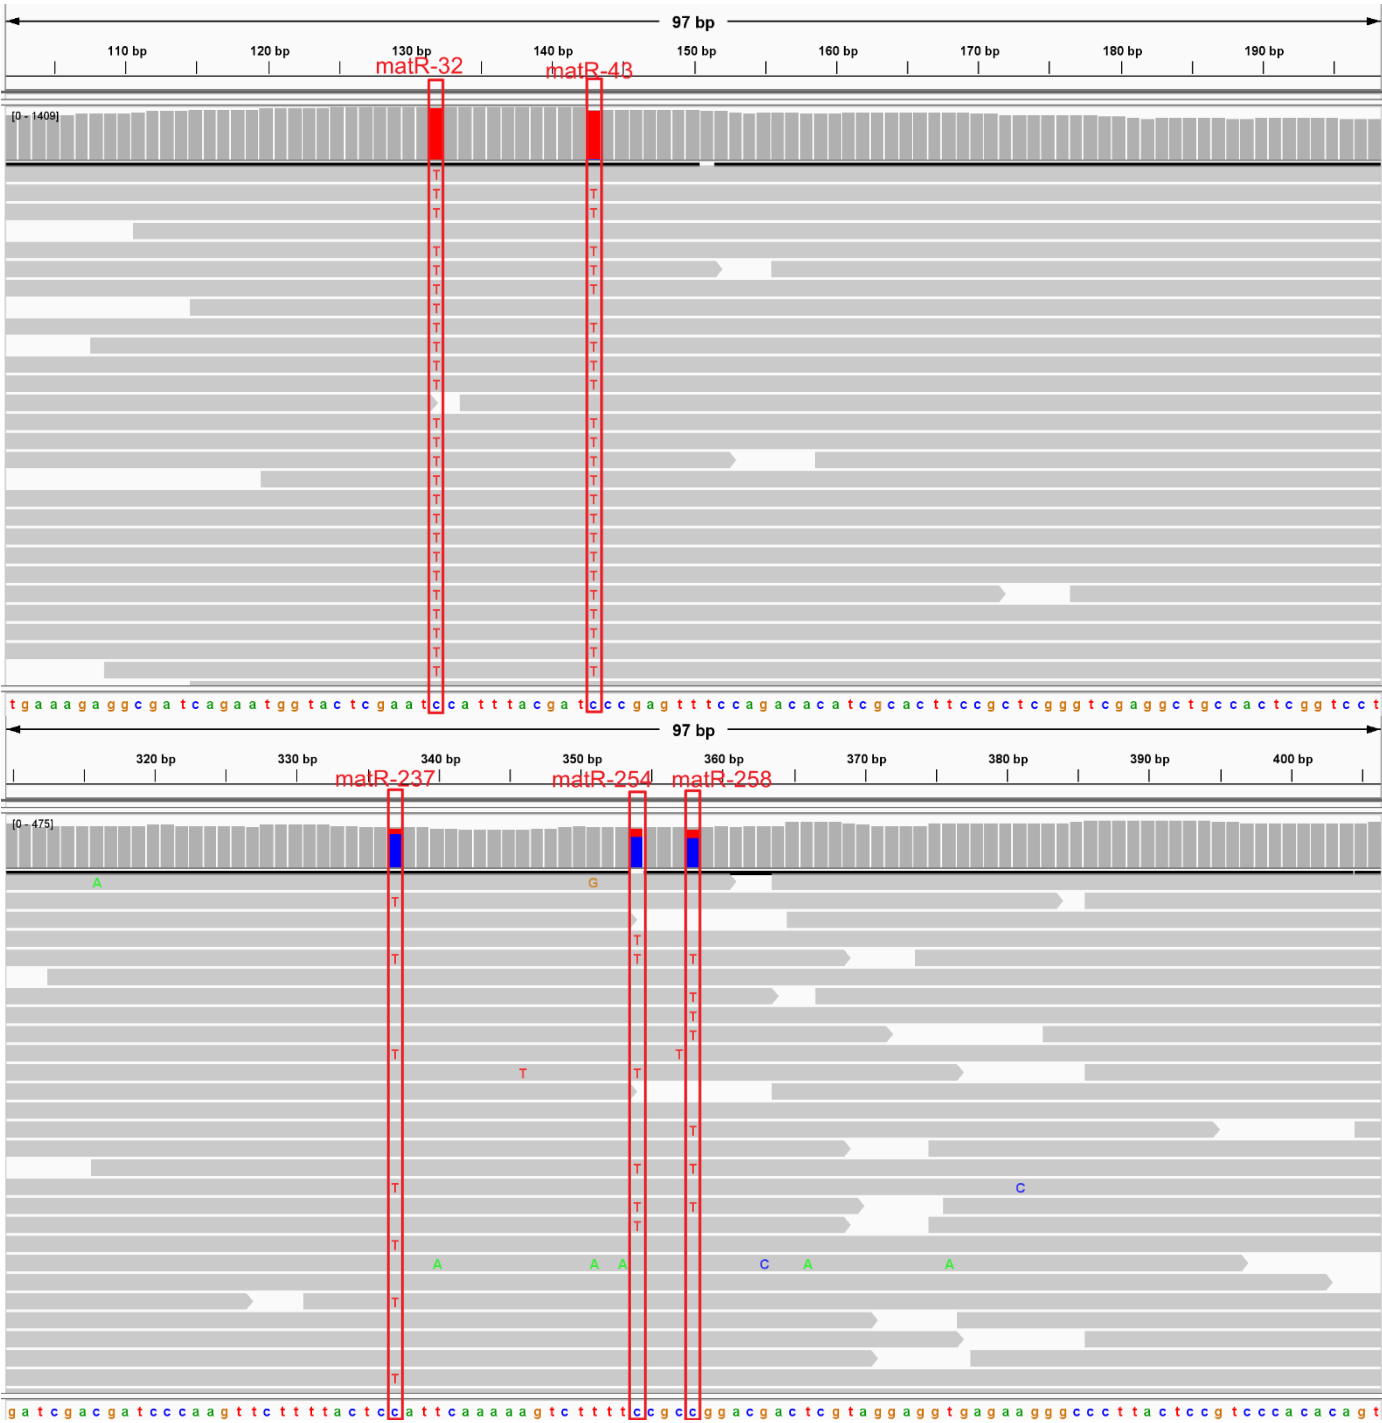

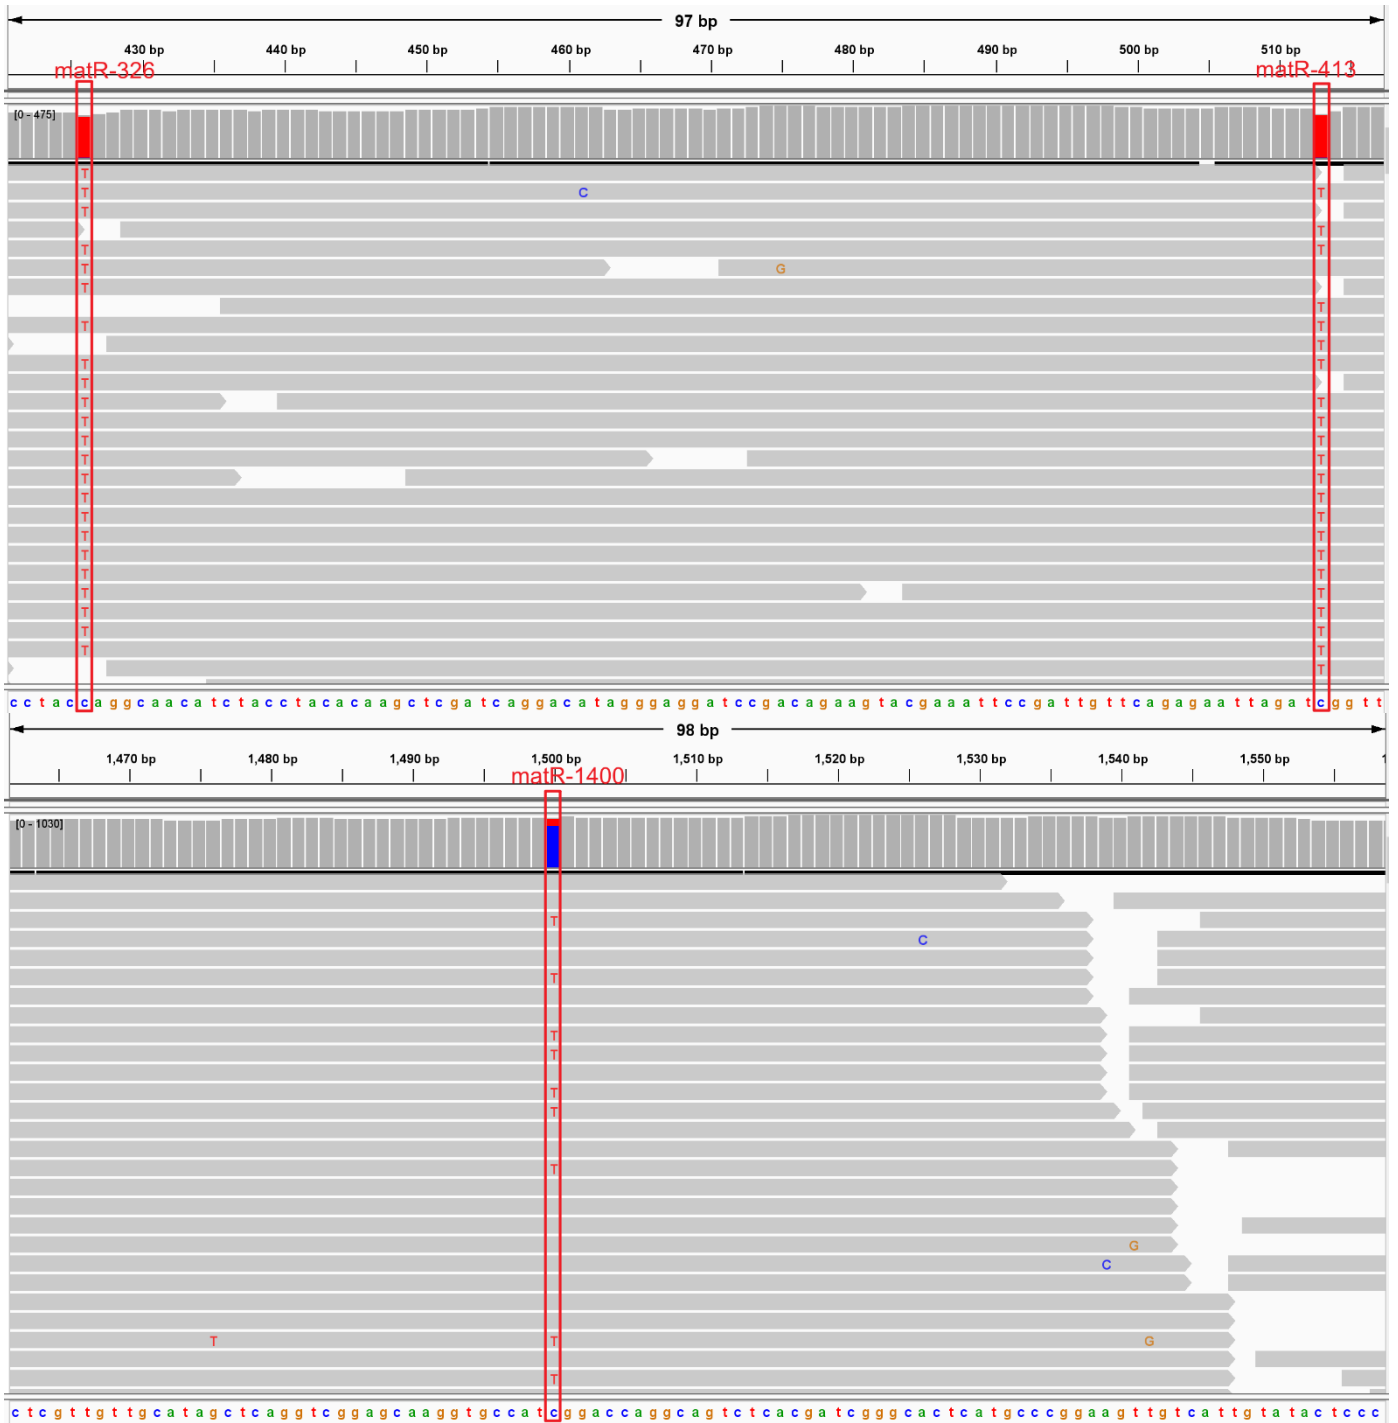

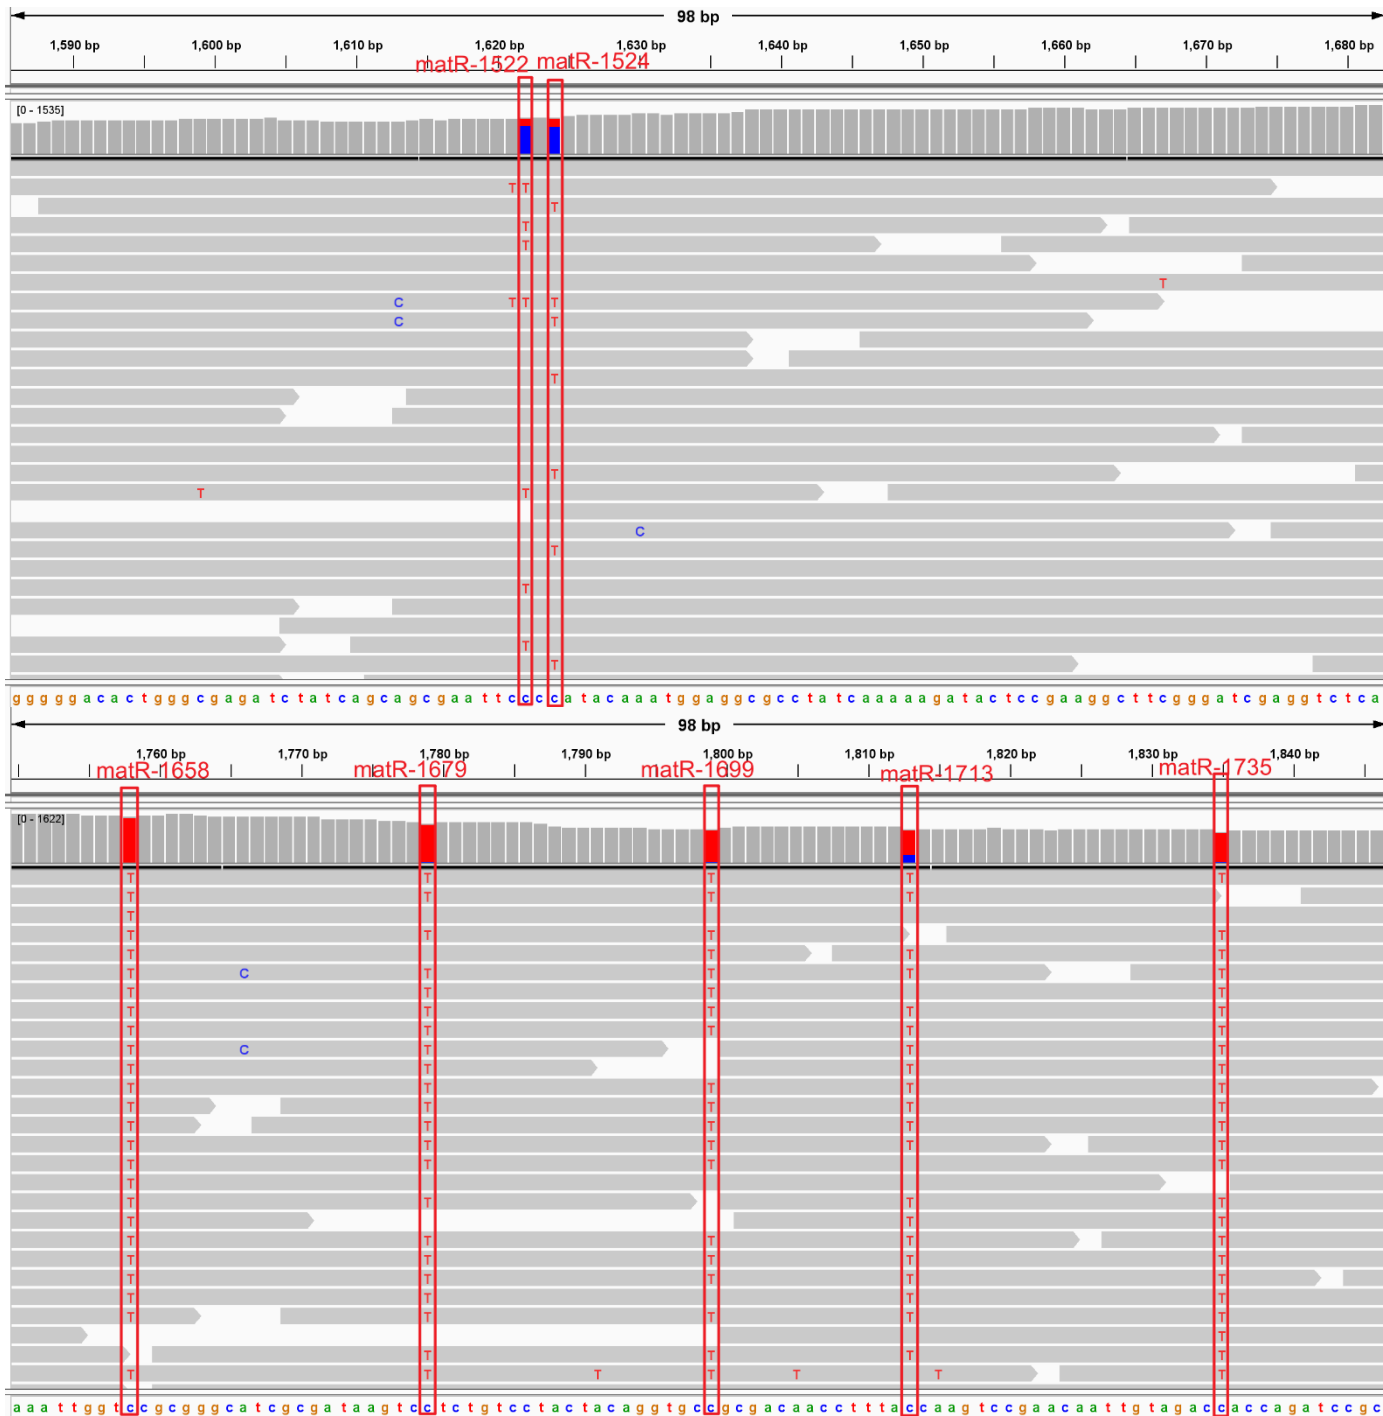

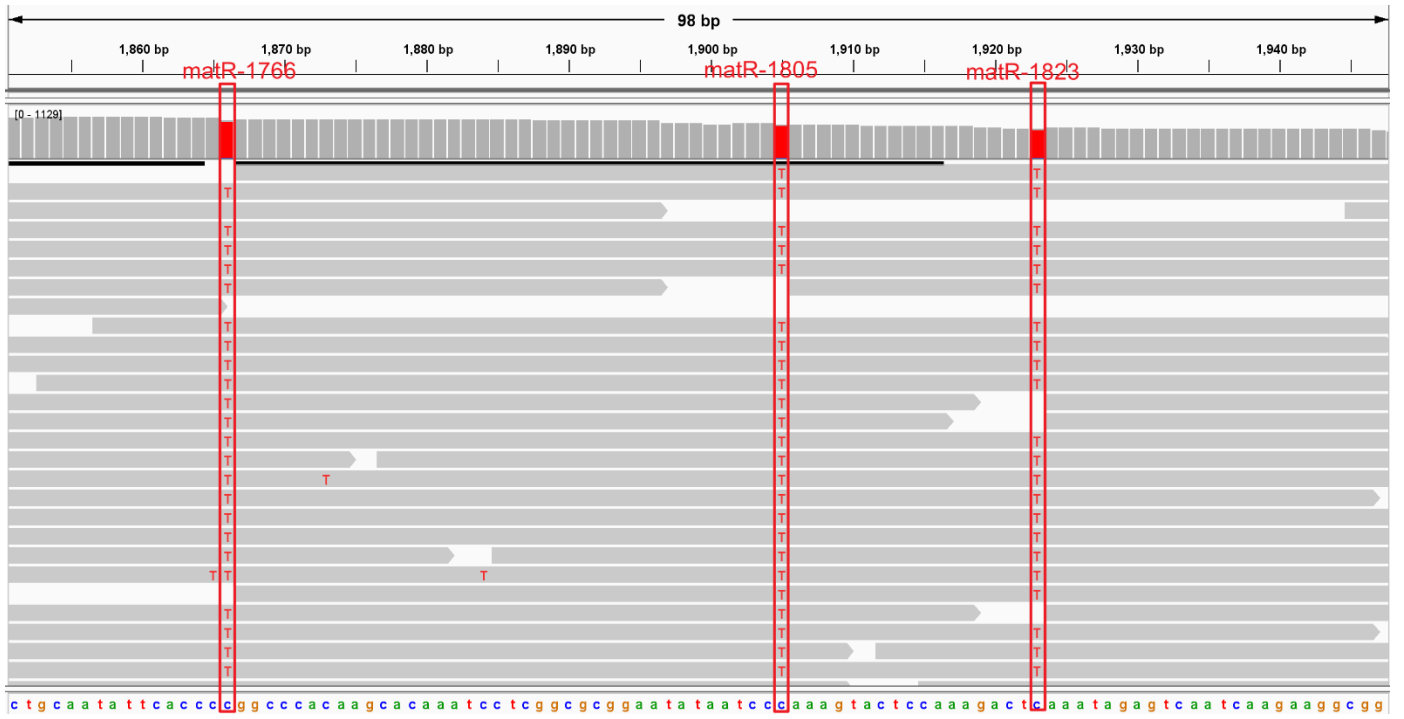

n alignment of RNA-seq reads to the coding sequence of *mttB*. 32 RNA-seq editing sites: *mttB*-16, 26, 64, 100, 112, 128, 131, 178, 188, 201, 202, 236, 262, 328, 331, 344, 346, 373, 376, 379, 407, 472, 497, 505, 541, 554, 578, 610, 616, 667, 672, and 713 were highlighted in red squares.

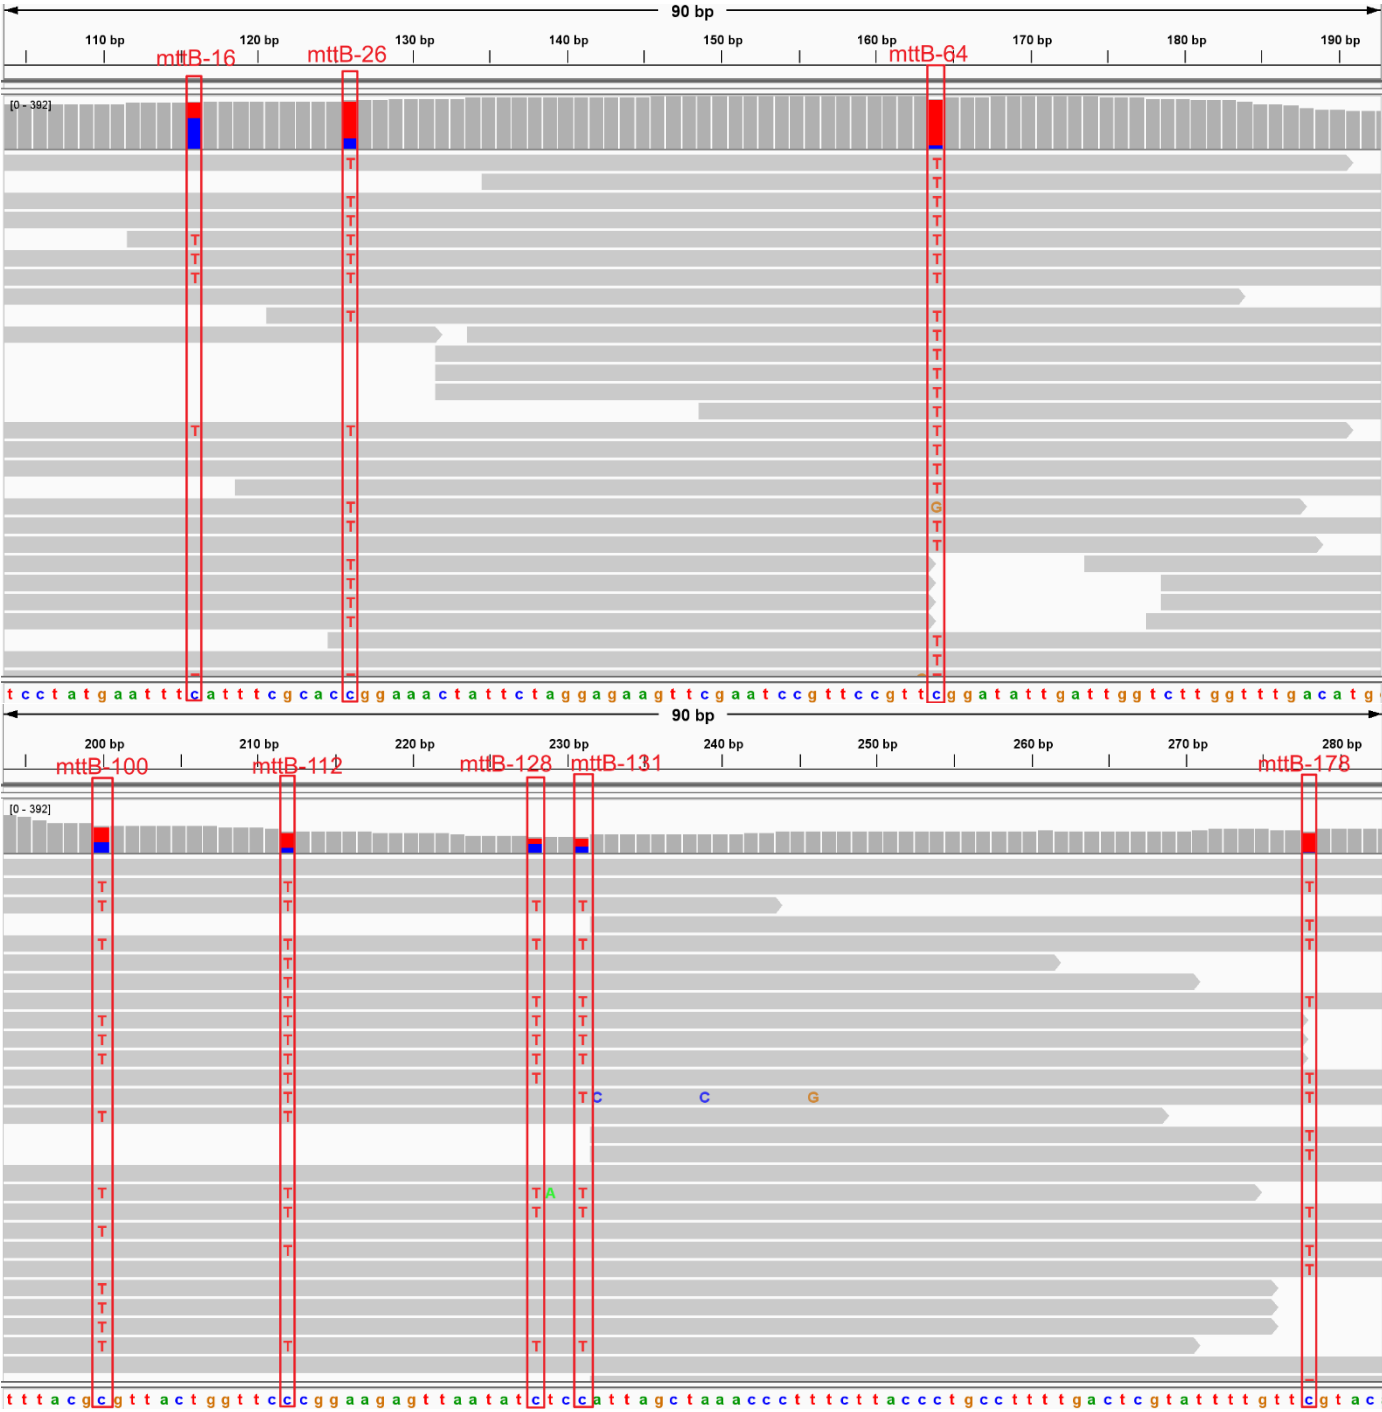



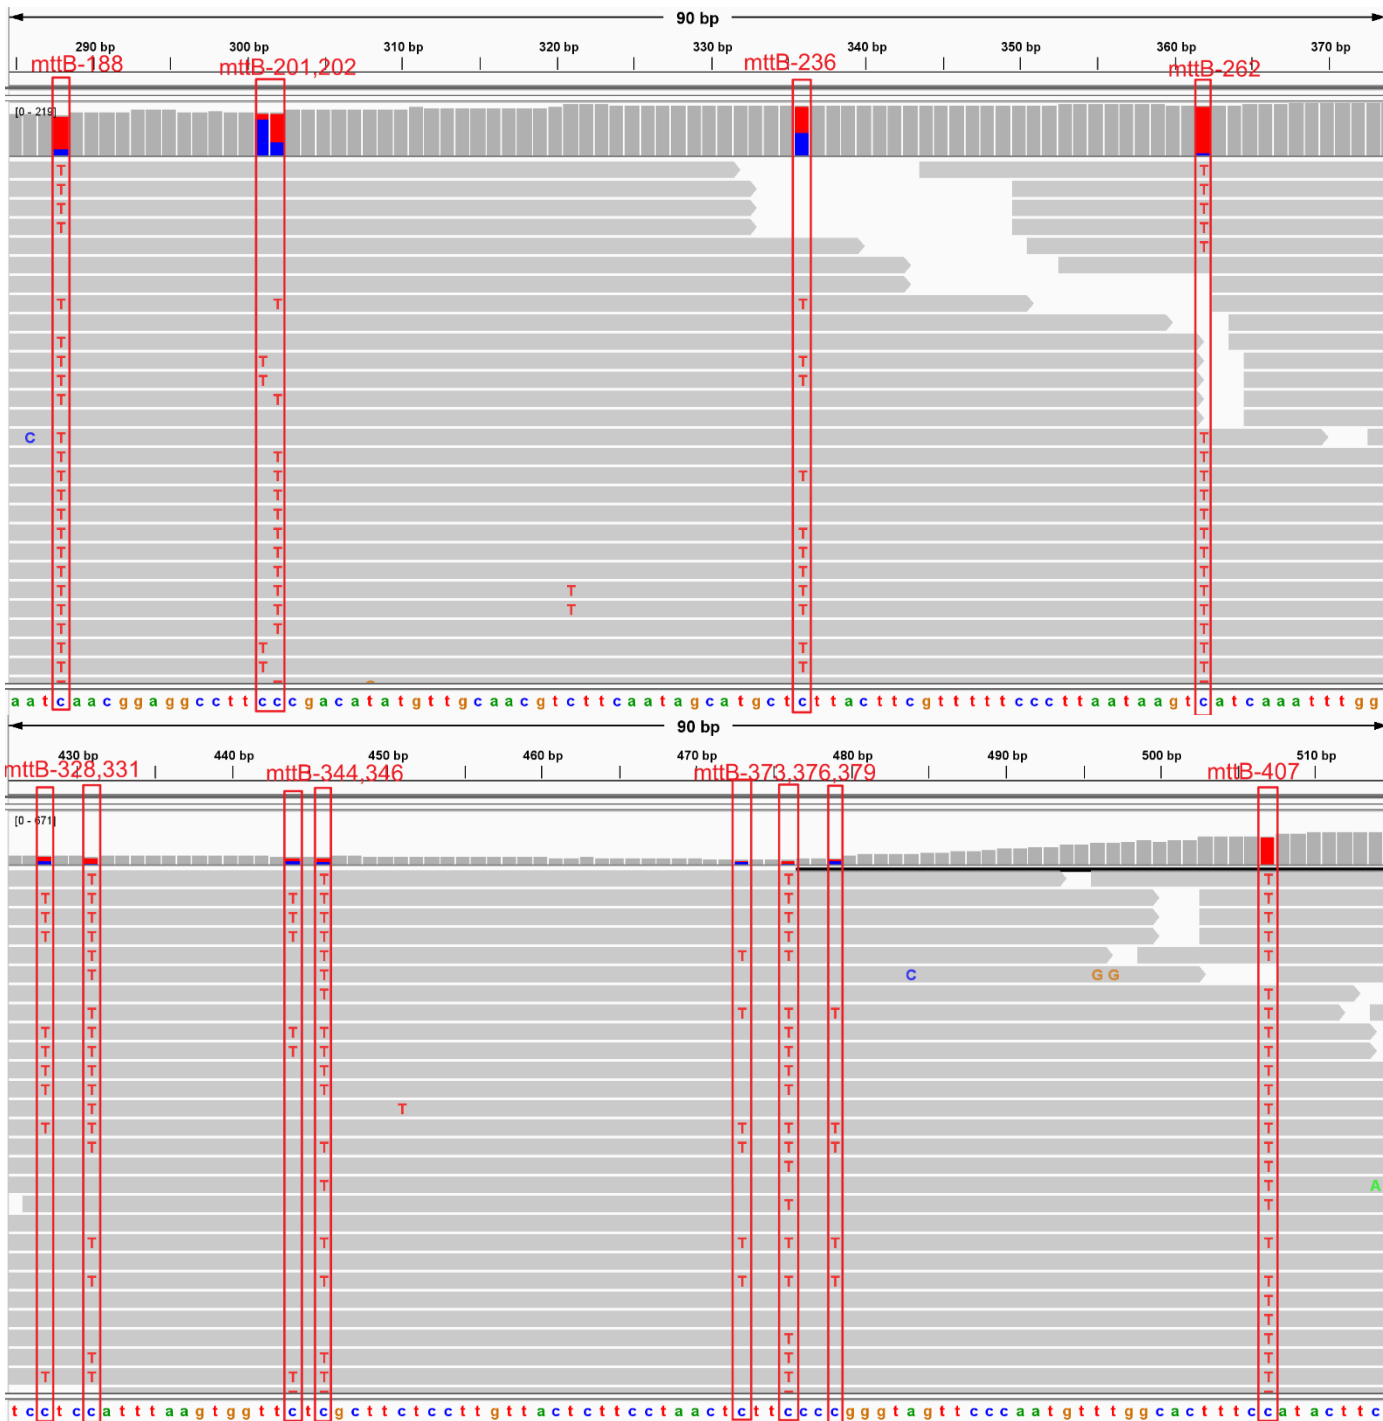

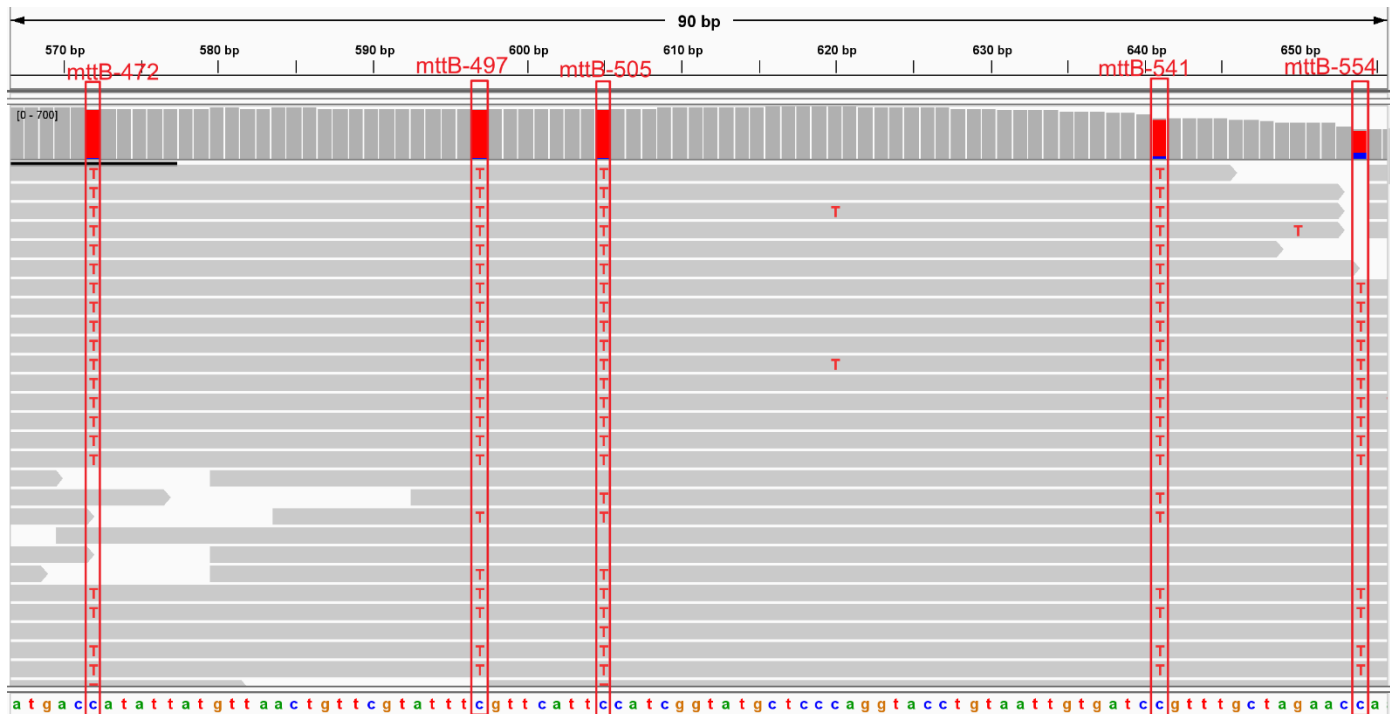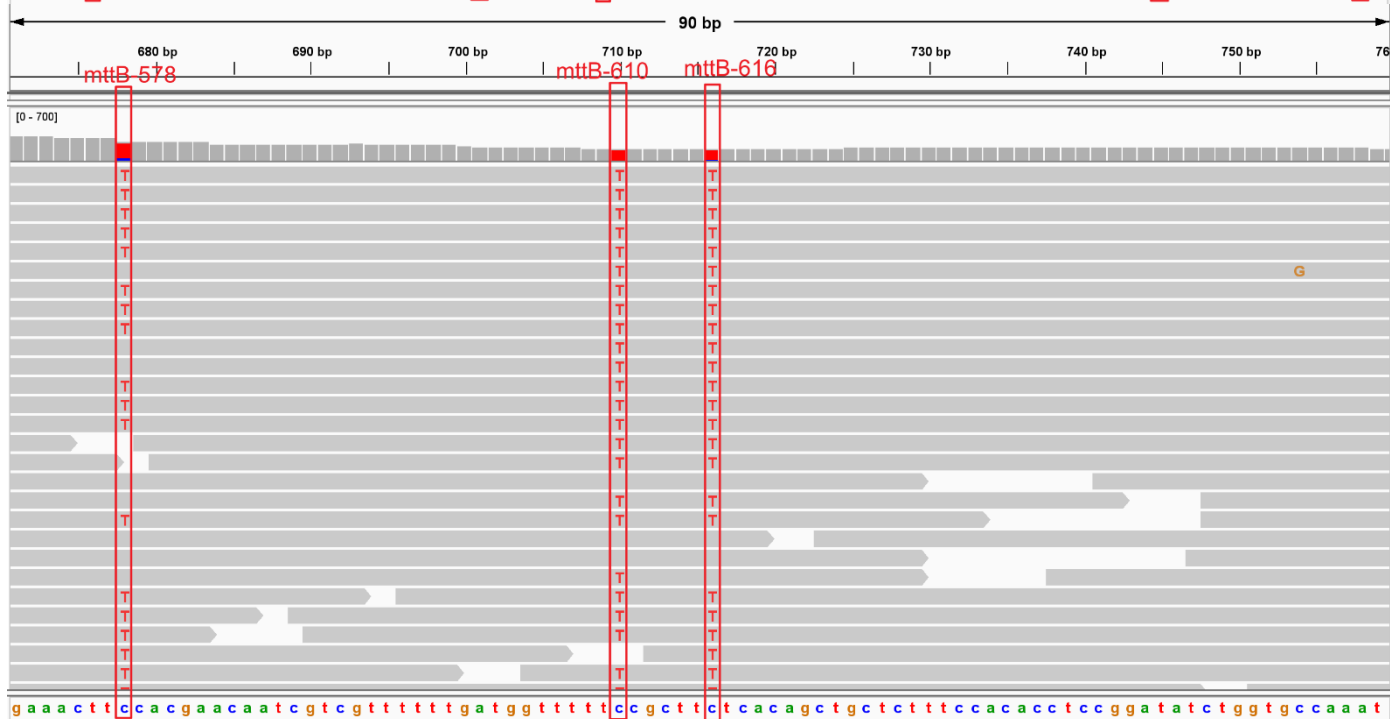

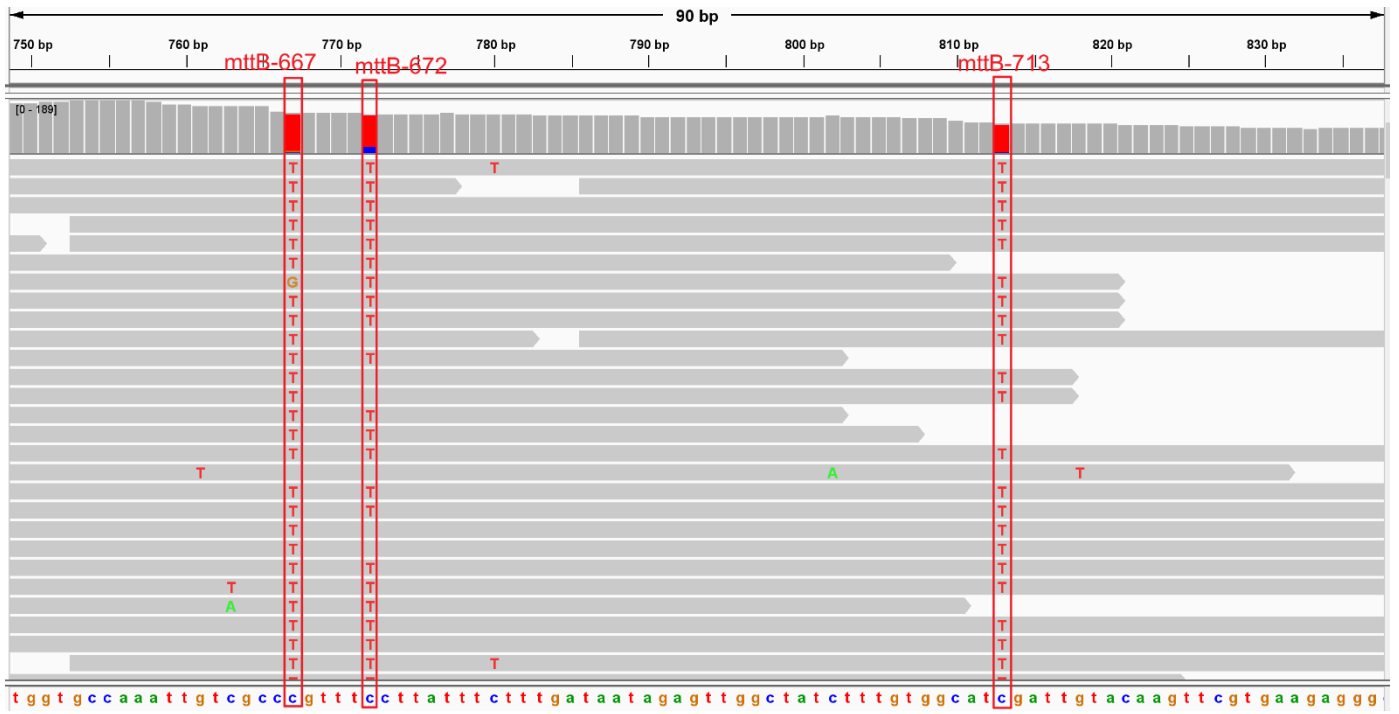

o alignment of RNA-seq reads to the coding sequence of *nad1*. 24 RNA-seq editing sites: *nad1*-215, 265, 307, 308, 376, 401, 436, 490, 492, 493, 500, 536, 635, 725, 734, 740, 743, 755, 779, 792, 823, 898, 909, 928 were highlighted in red squares.

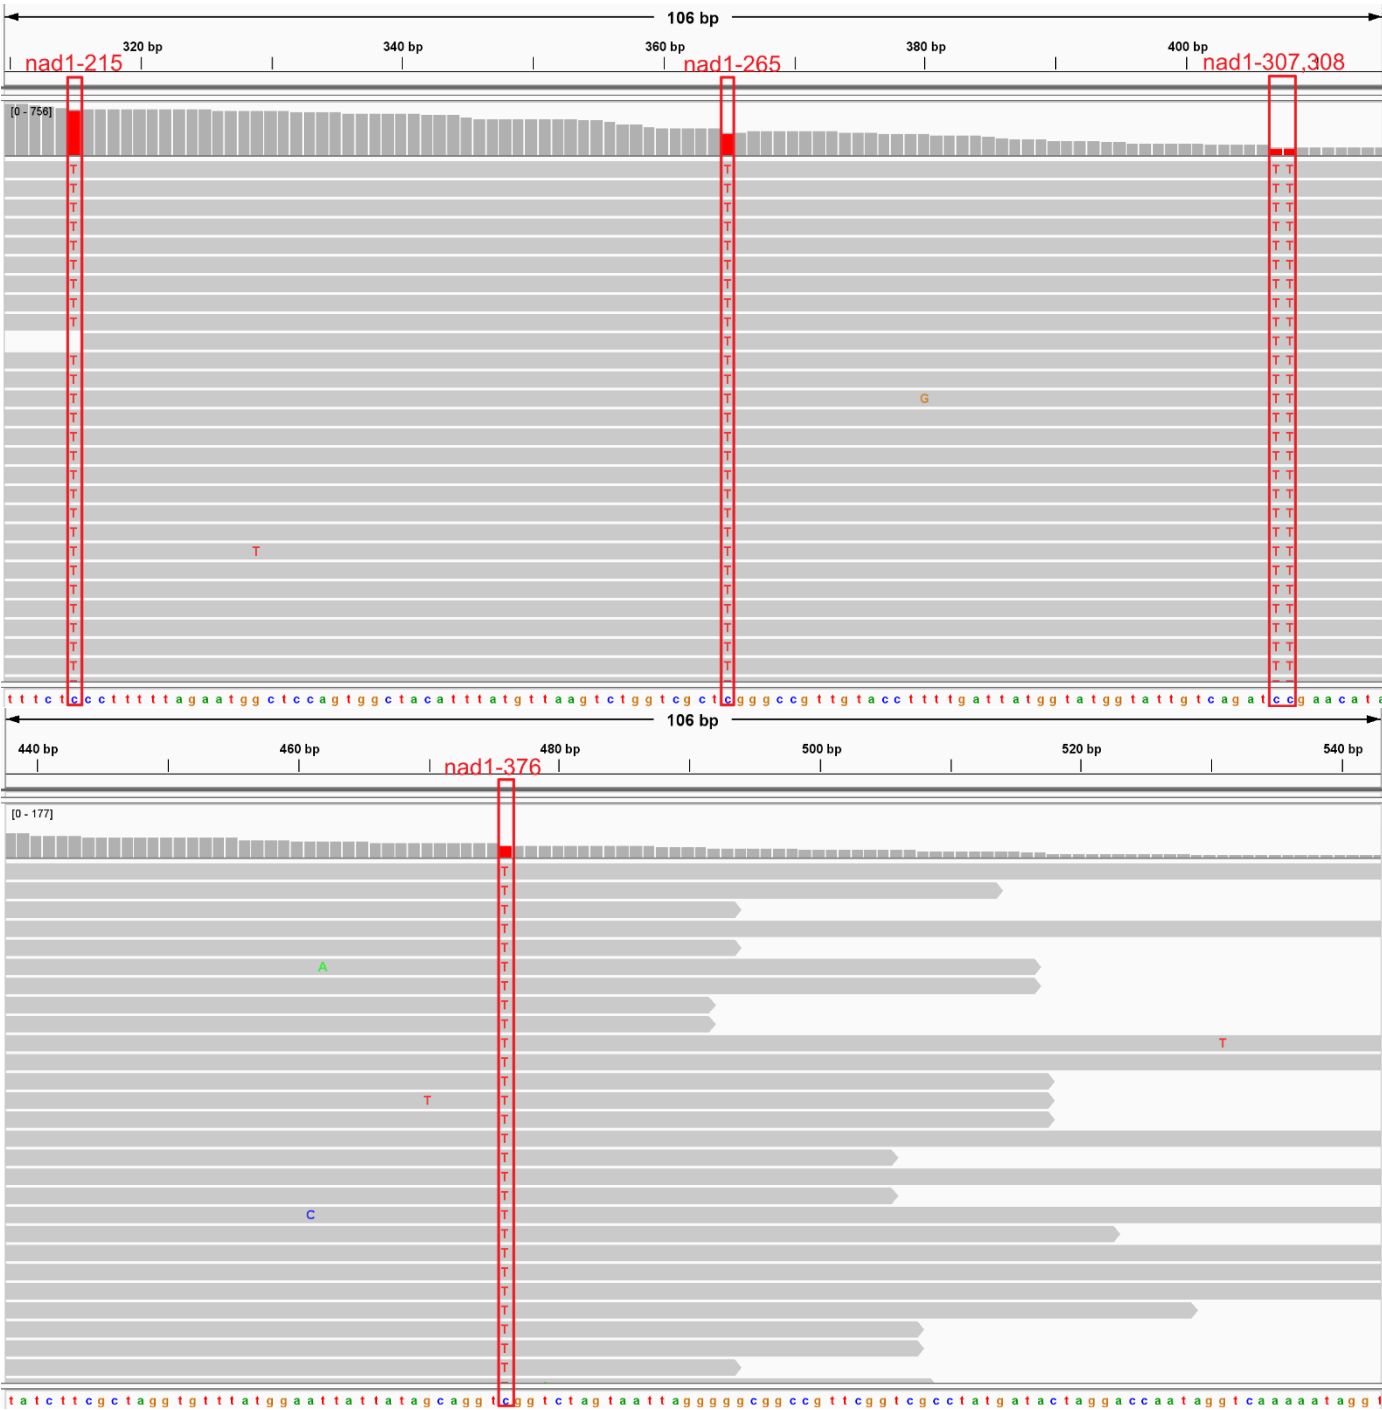

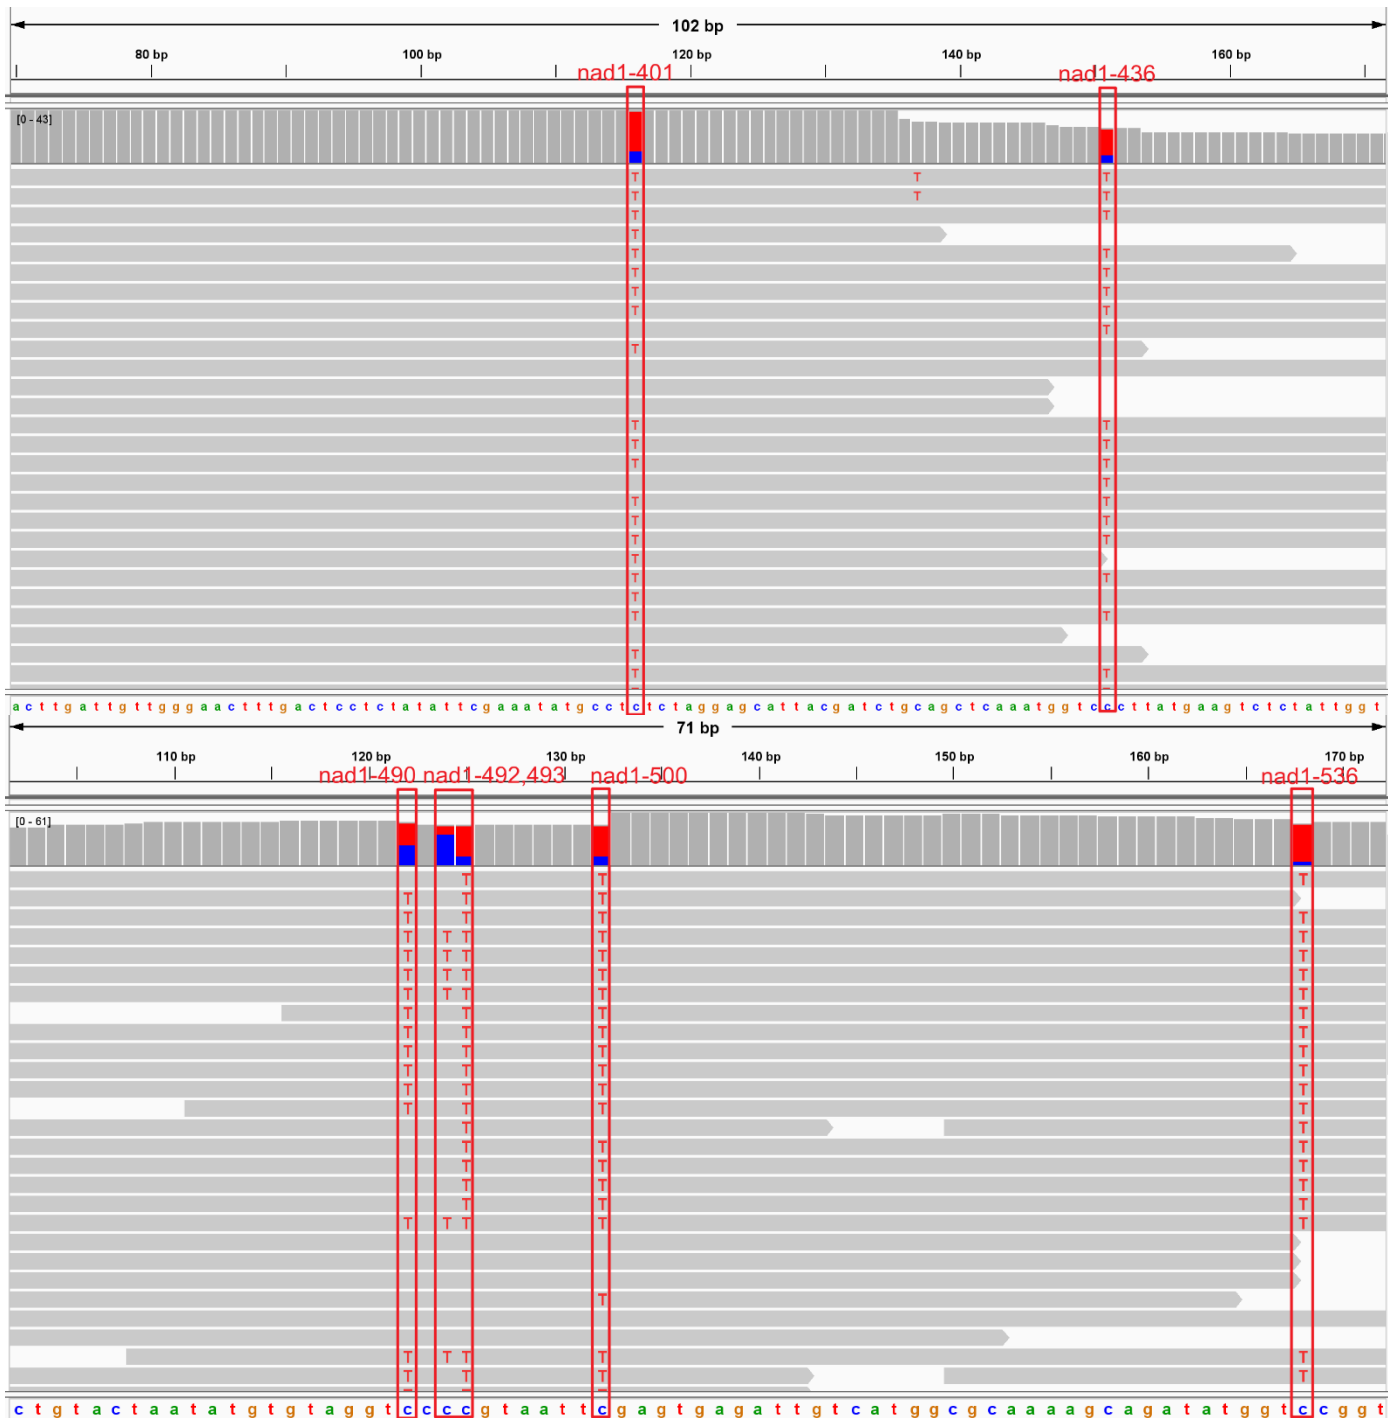

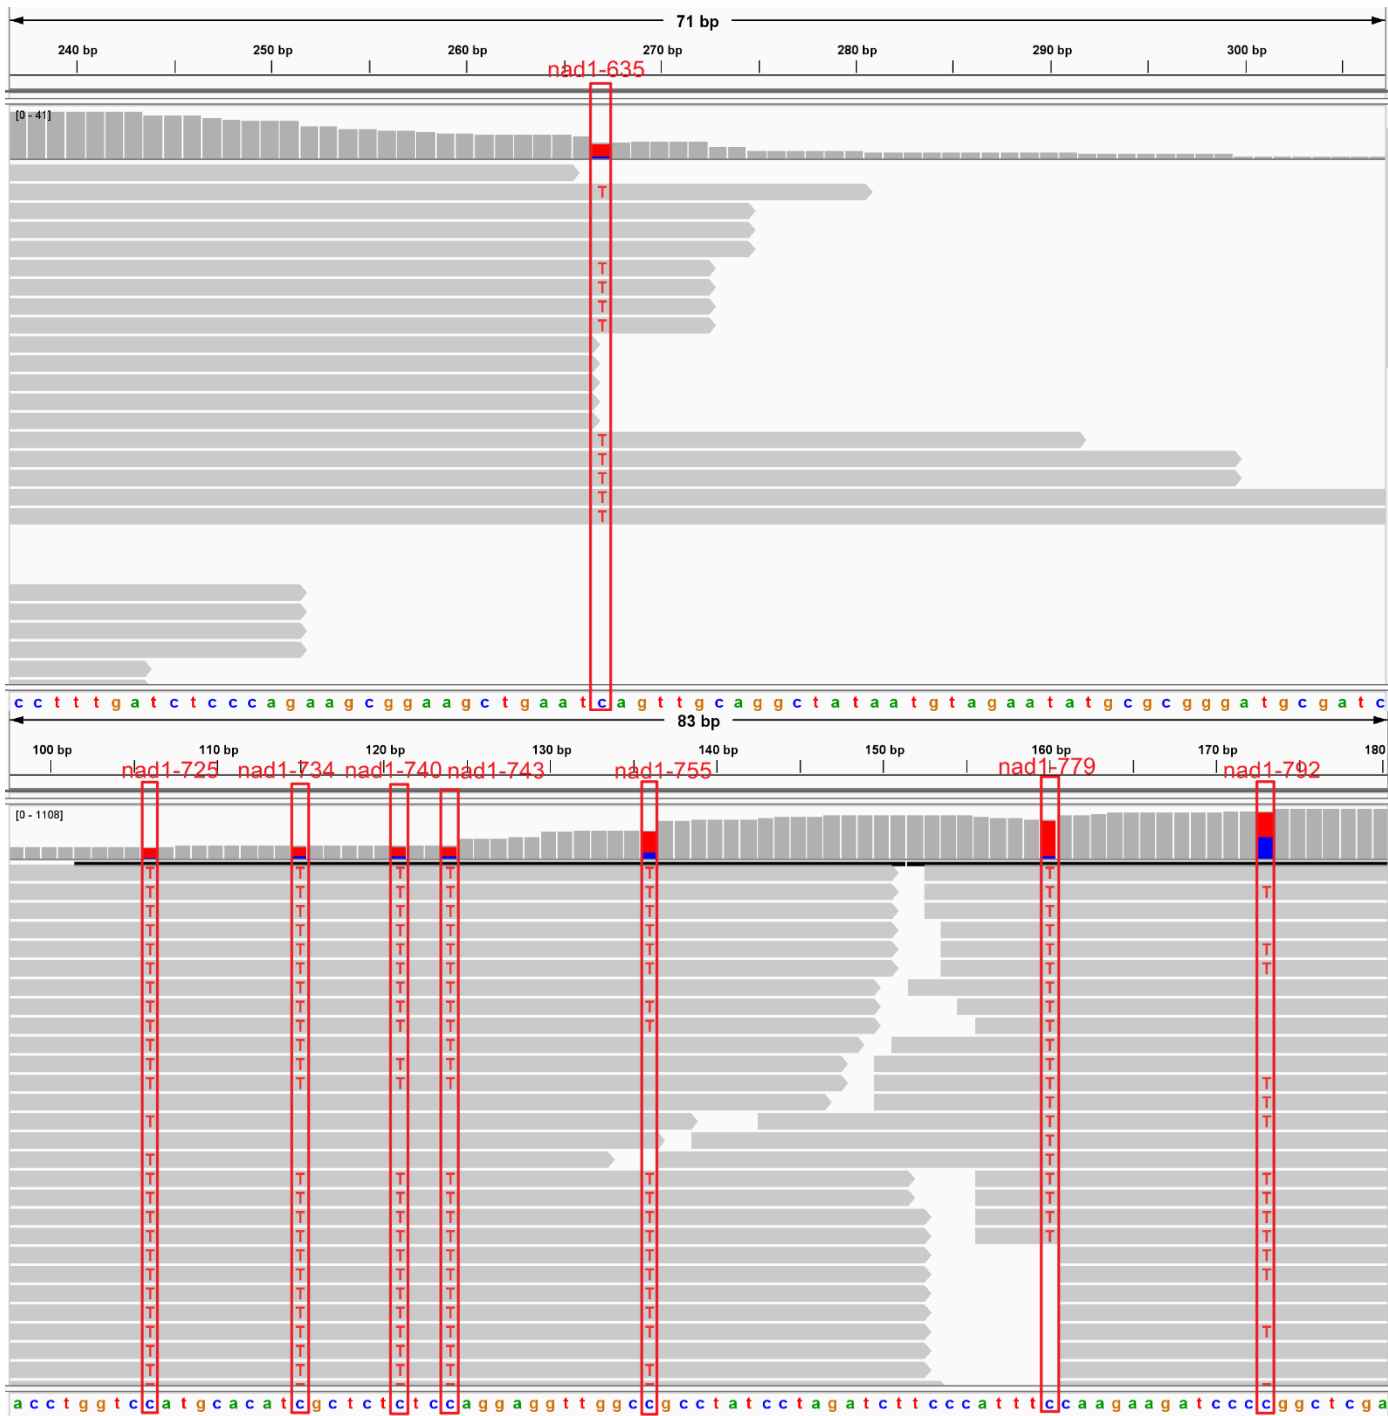

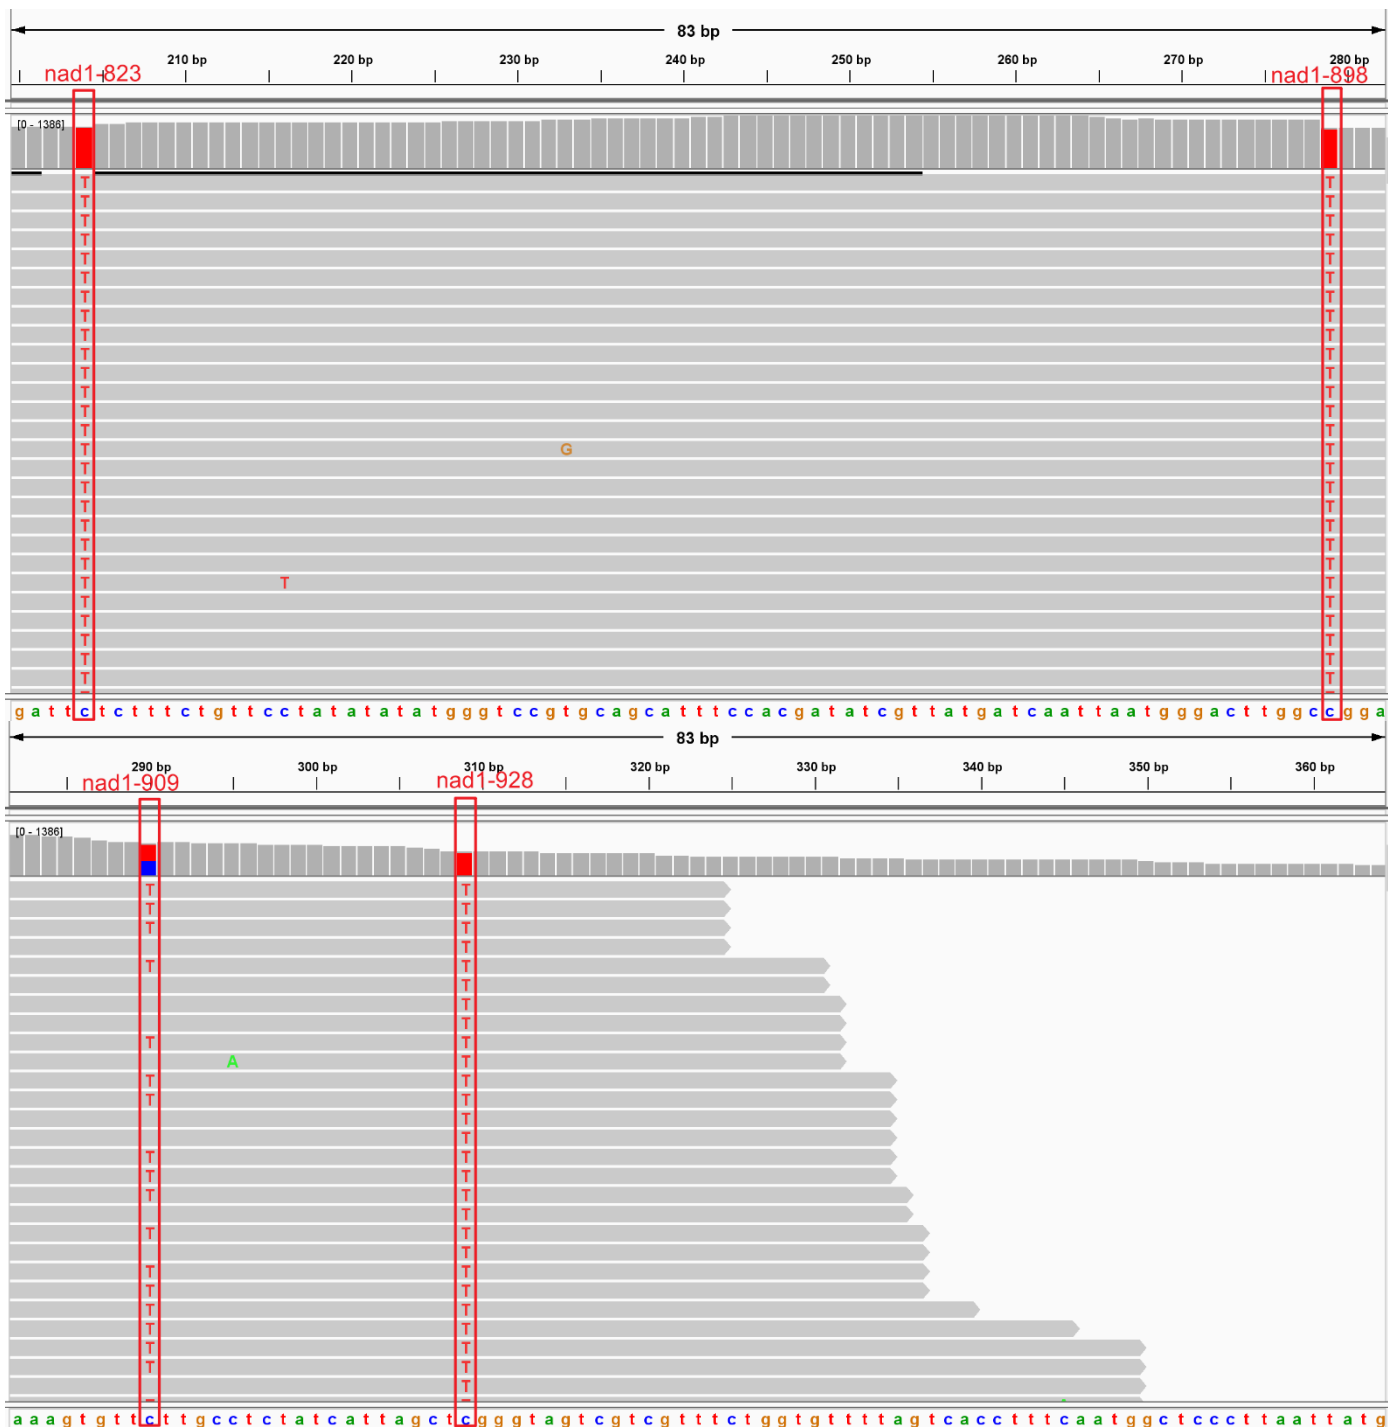

p alignment of RNA-seq reads to the coding sequence of *nad2*. 25 RNA-seq editing sites: *nad2*-26, 223, 252, 303, 308, 311, 356, 361, 367, 401, 428, 497, 788, 800, 809, 928, 958, 1028, 1058, 1298, 1400, 1408, 1409, 1416, 1457 were highlighted in red squares.

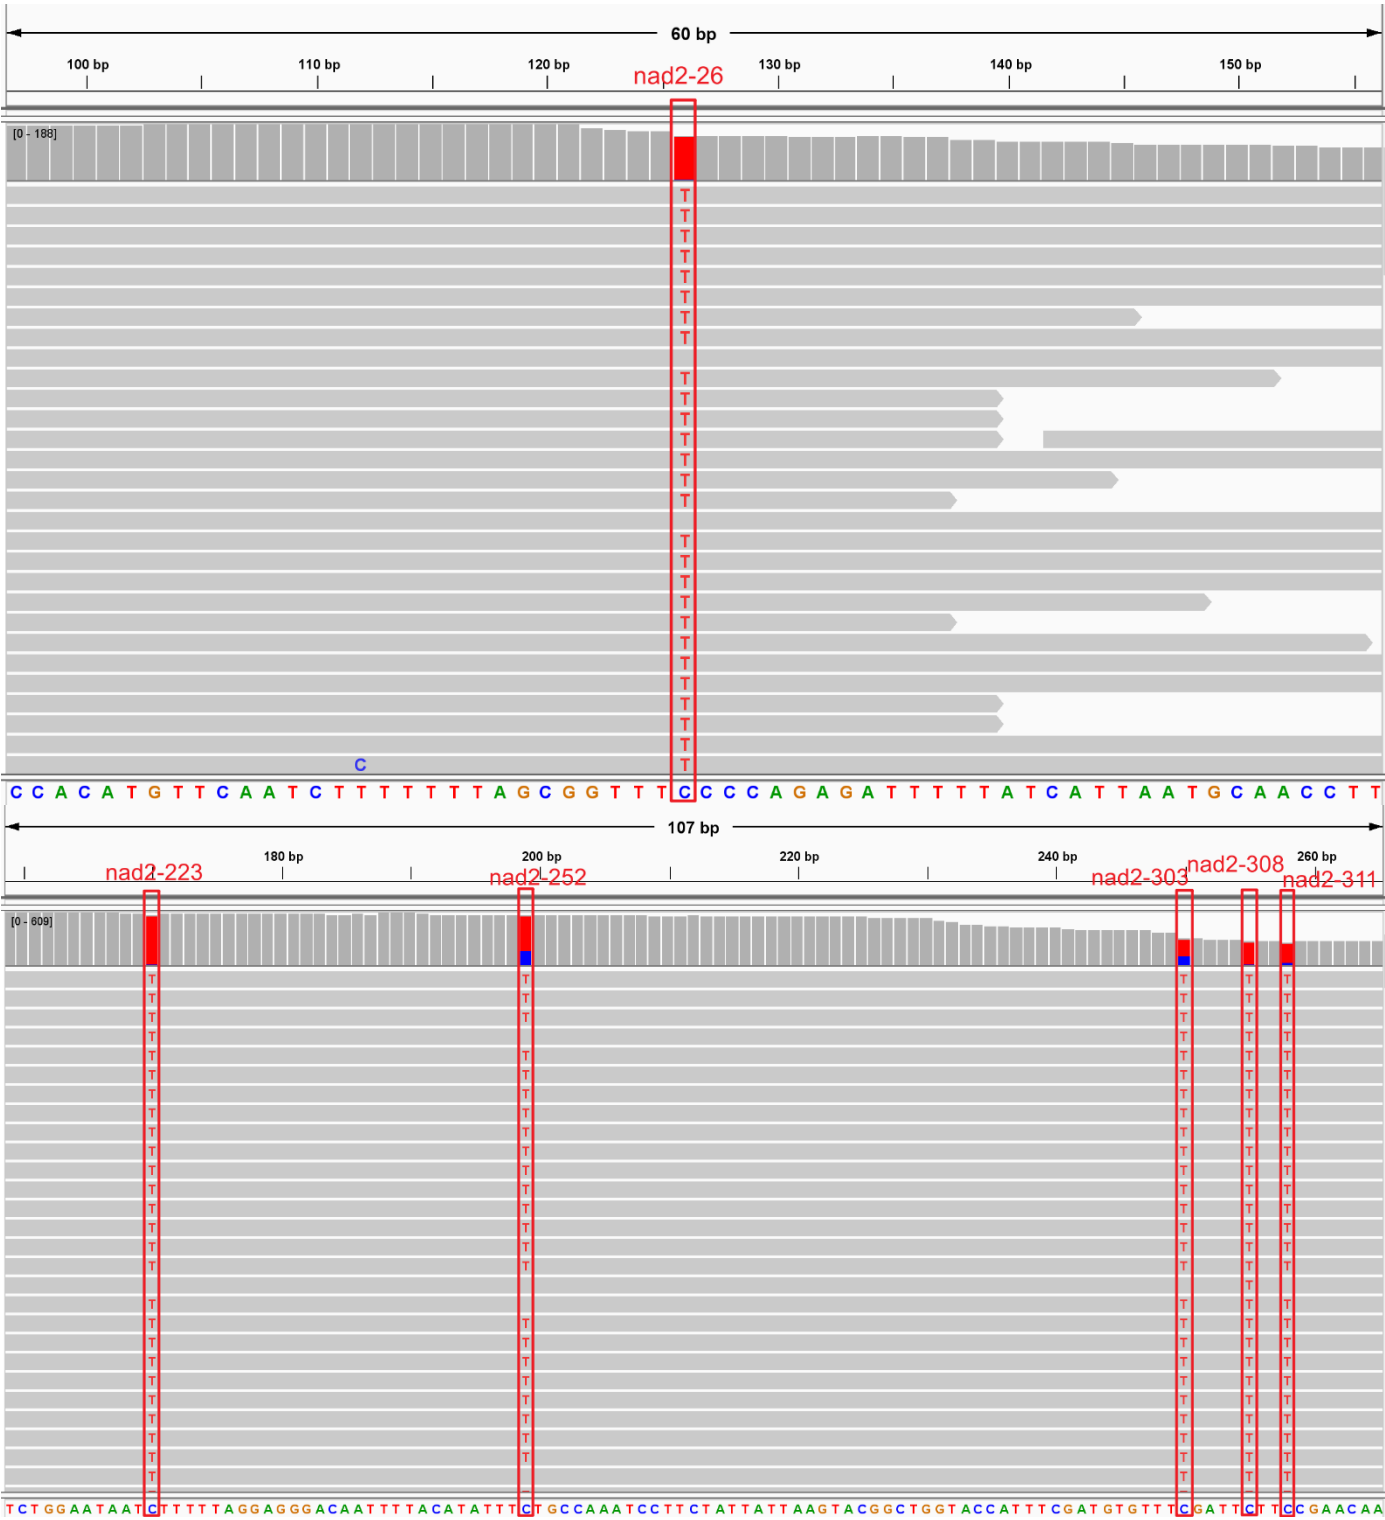



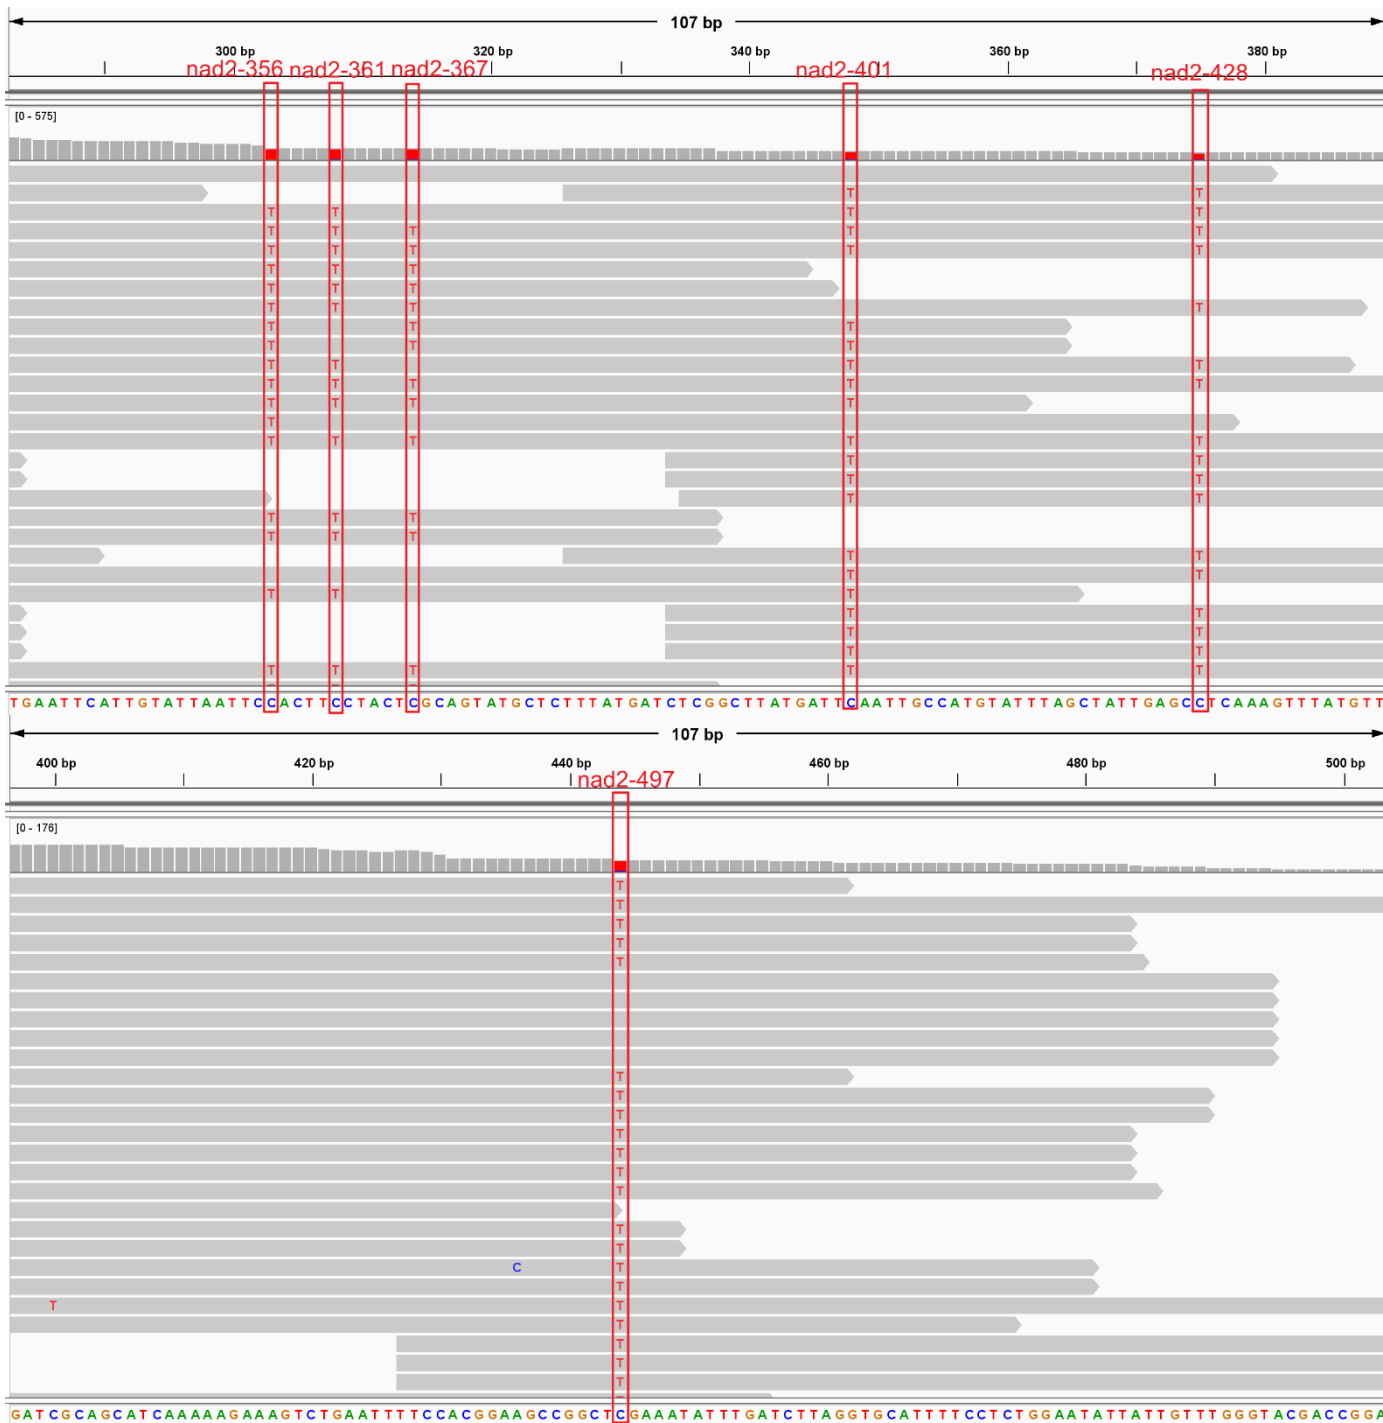

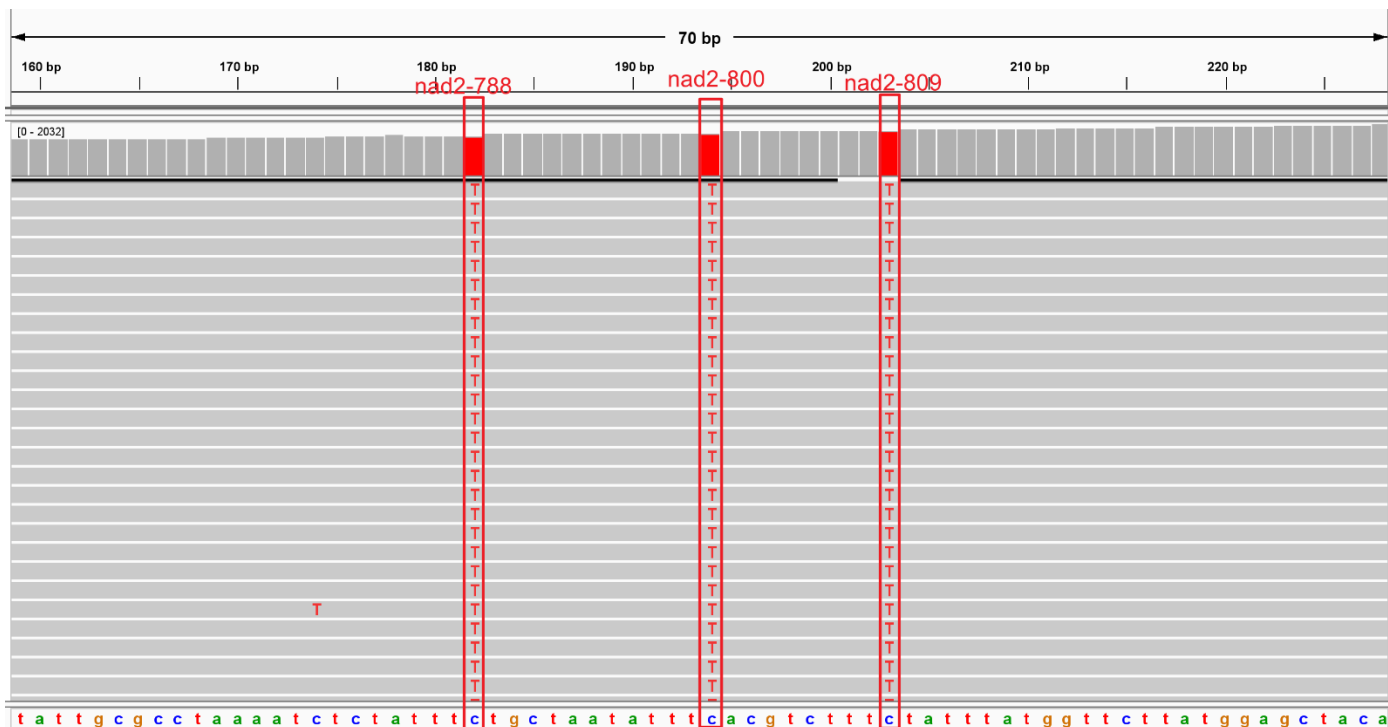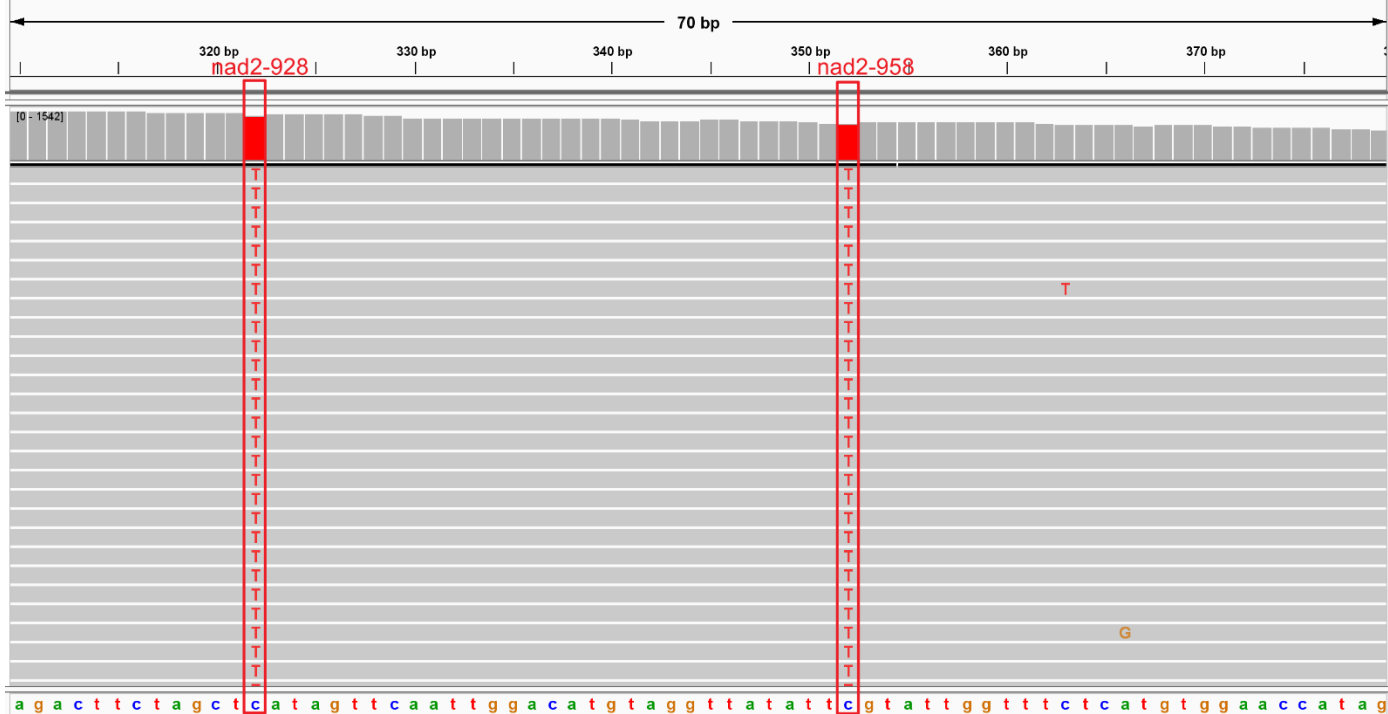

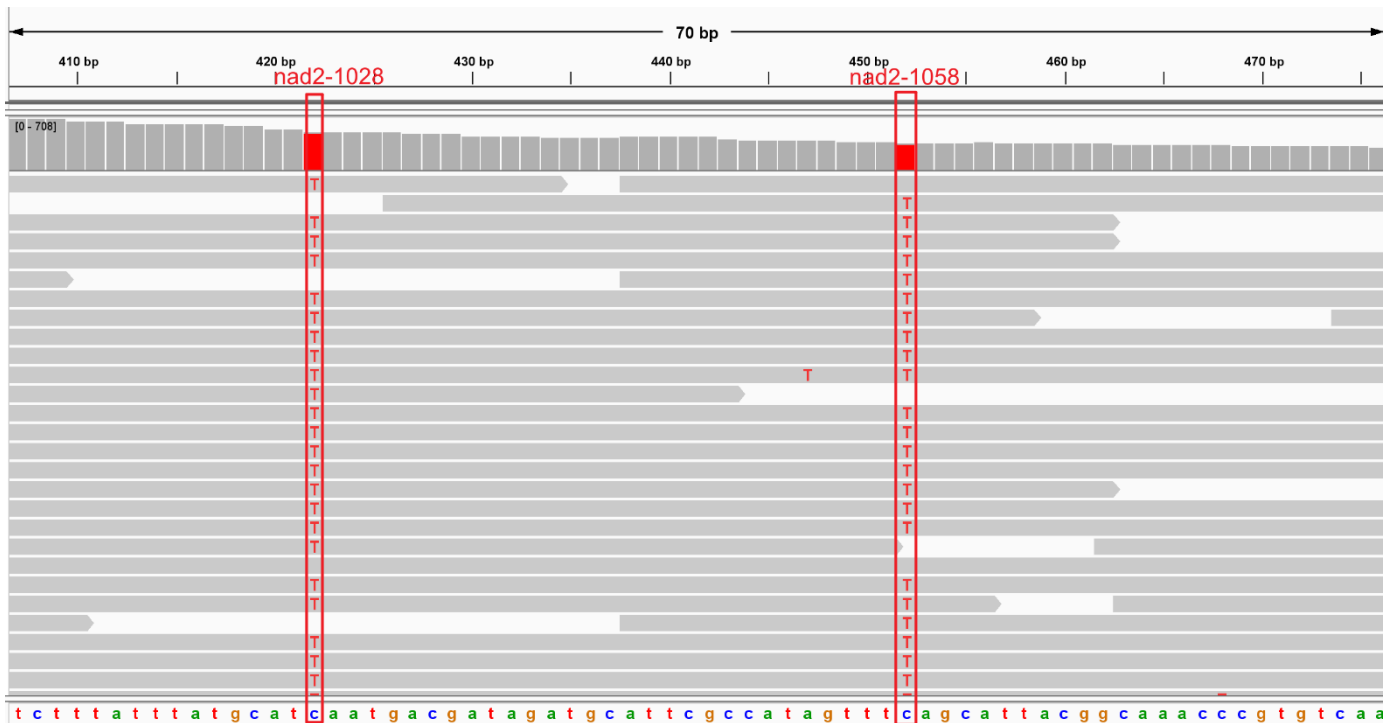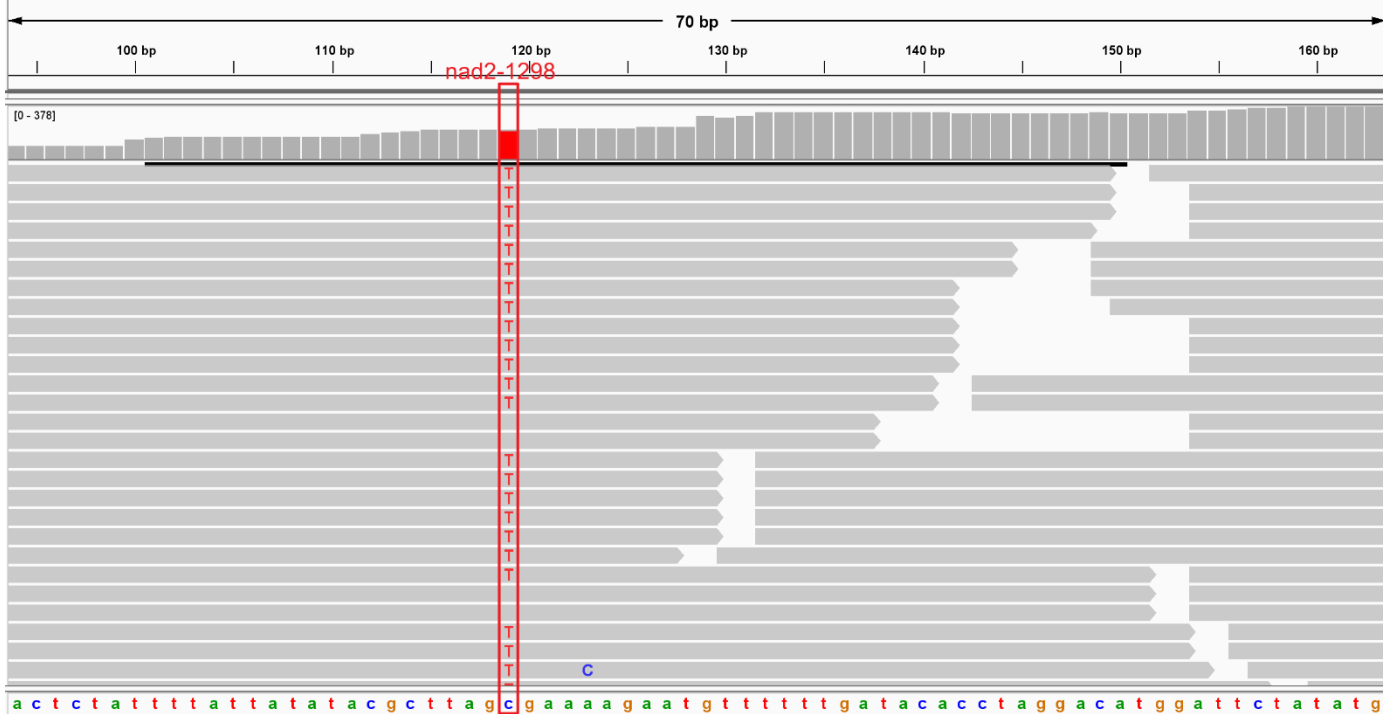

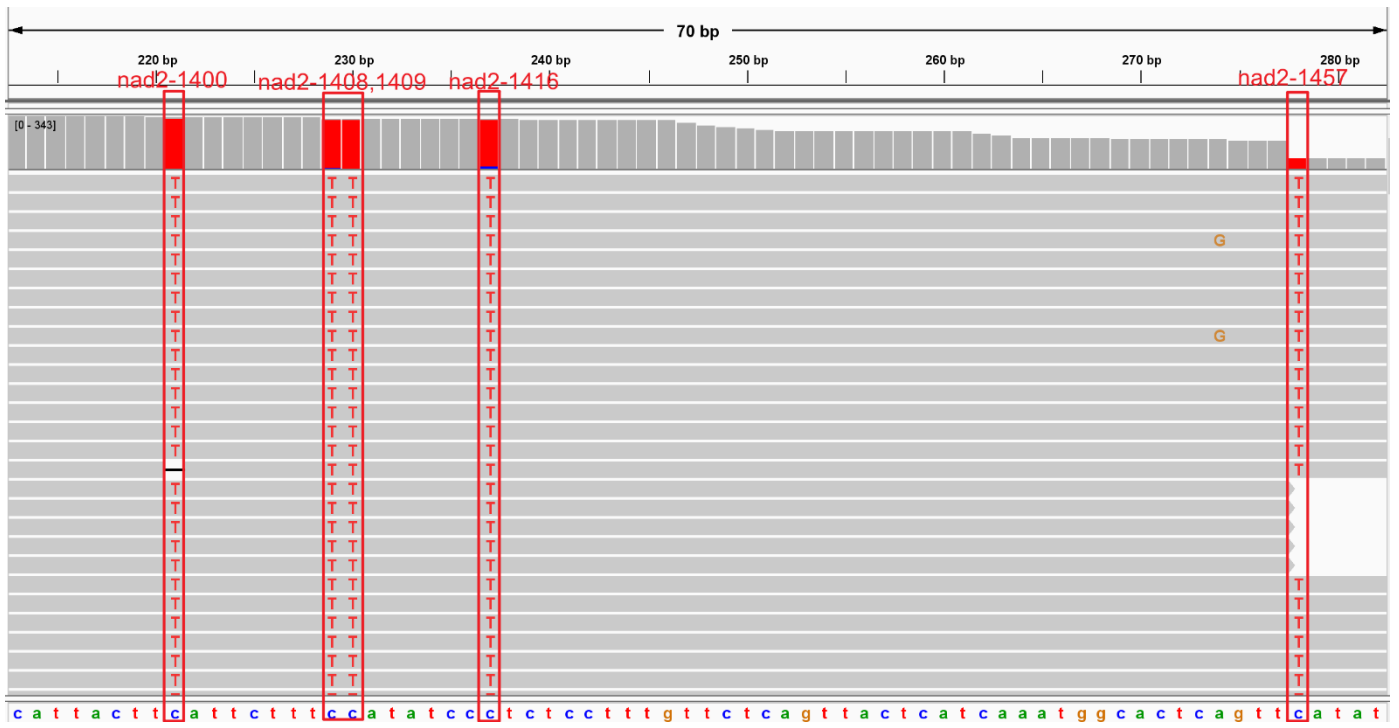

q alignment of RNA-seq reads to the coding sequence of *nad3*. 17 RNA-seq editing sites: *nad3*-44, 62, 79, 80, 124, 146, 208, 209, 215, 230, 247, 251, 266, 275, 317, 344, 349 were highlighted in red squares.

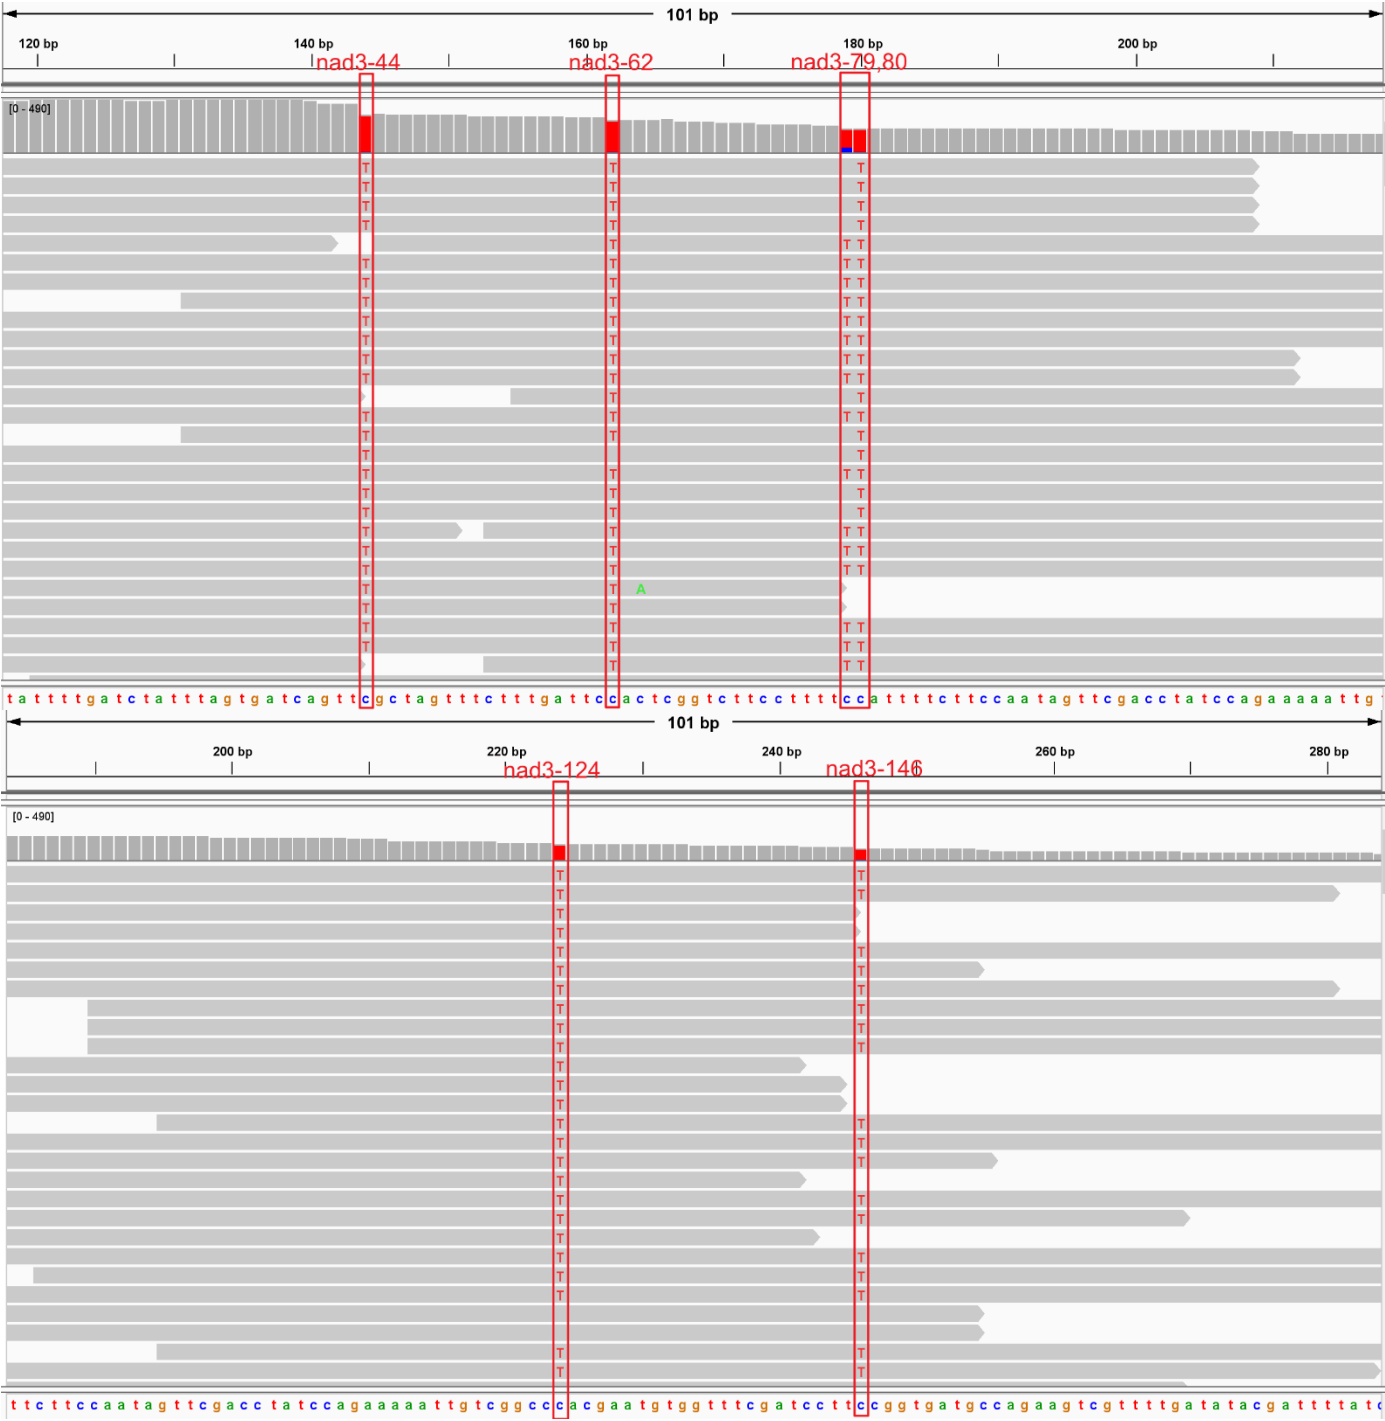

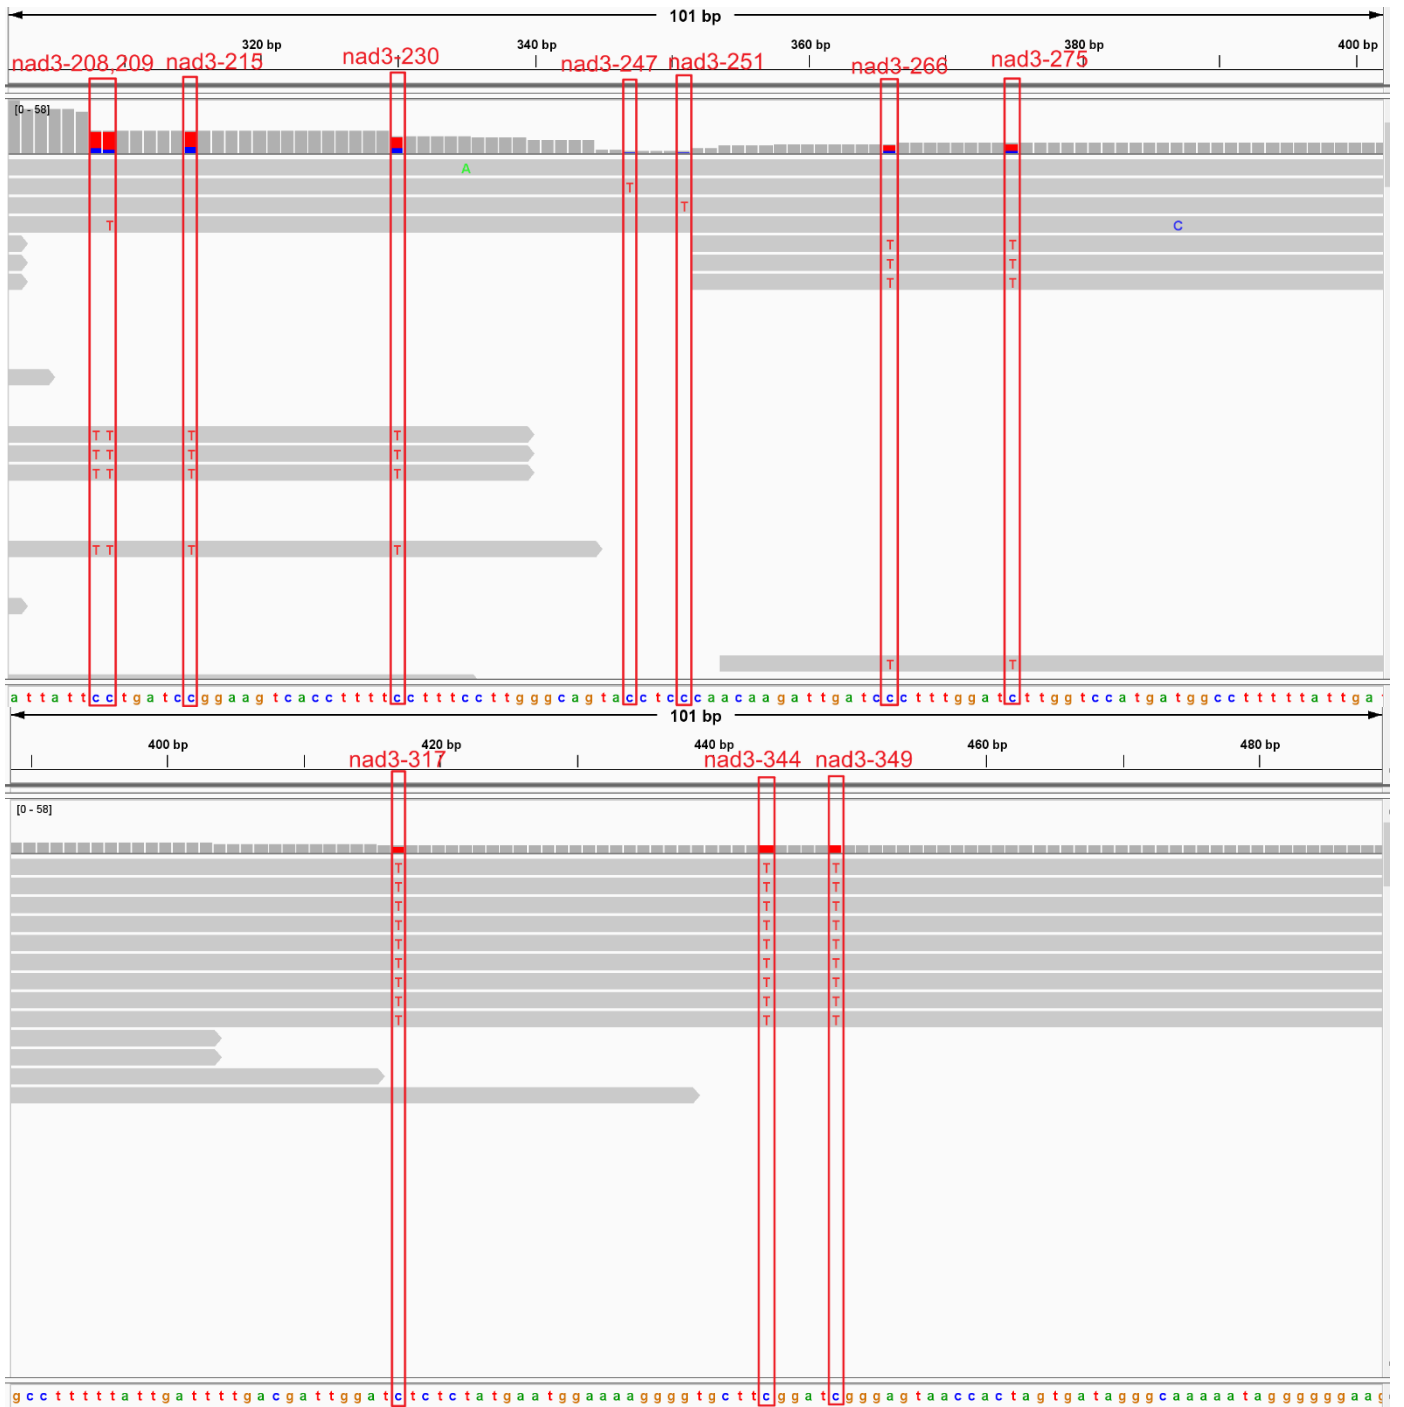

r alignment of RNA-seq reads to the coding sequence of *nad4*. 36 RNA-seq editing sites: *nad4*-65, 68, 75, 98, 149, 157, 188, 353, 359, 367, 407, 424, 427, 428, 440, 599, 637, 650, 758, 810, 847, 848, 878, 997, 1001, 1007, 1100, 1120, 1123, 1142, 1163, 1298, 1346, 1364, 1408, 1424 were highlighted in red squares.

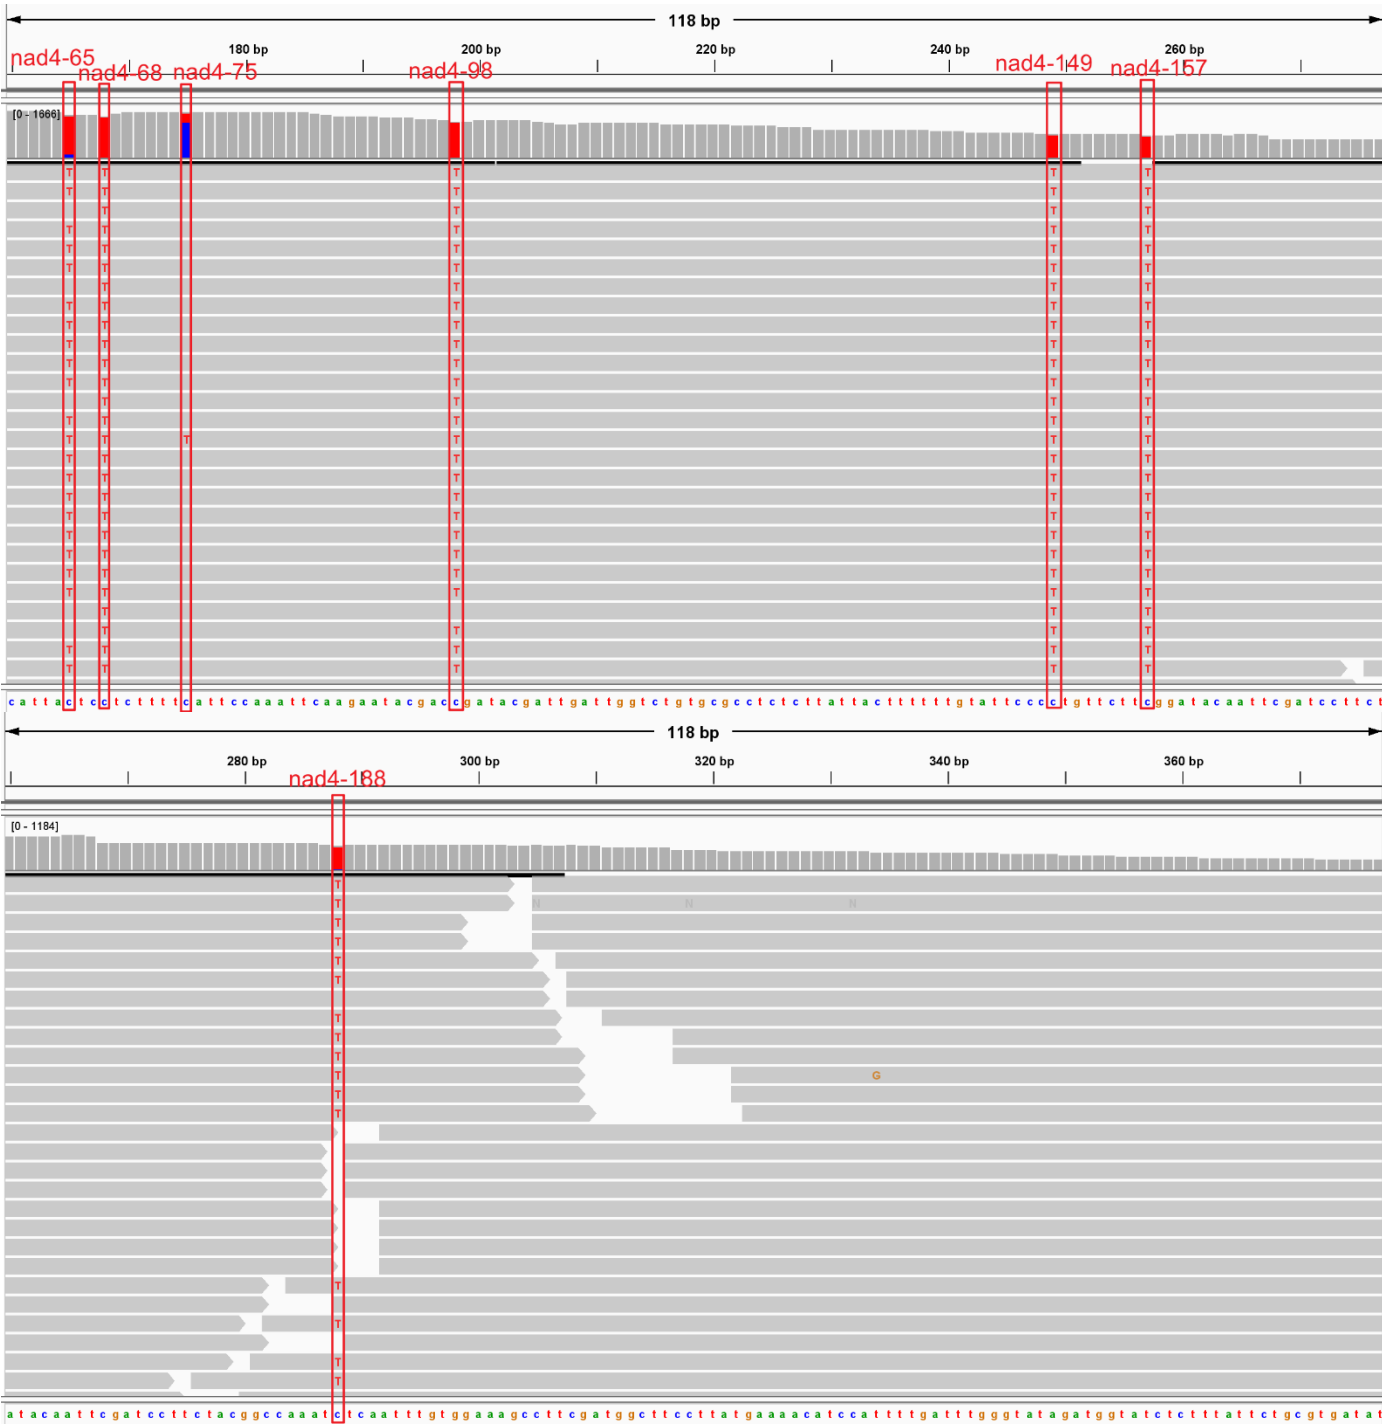

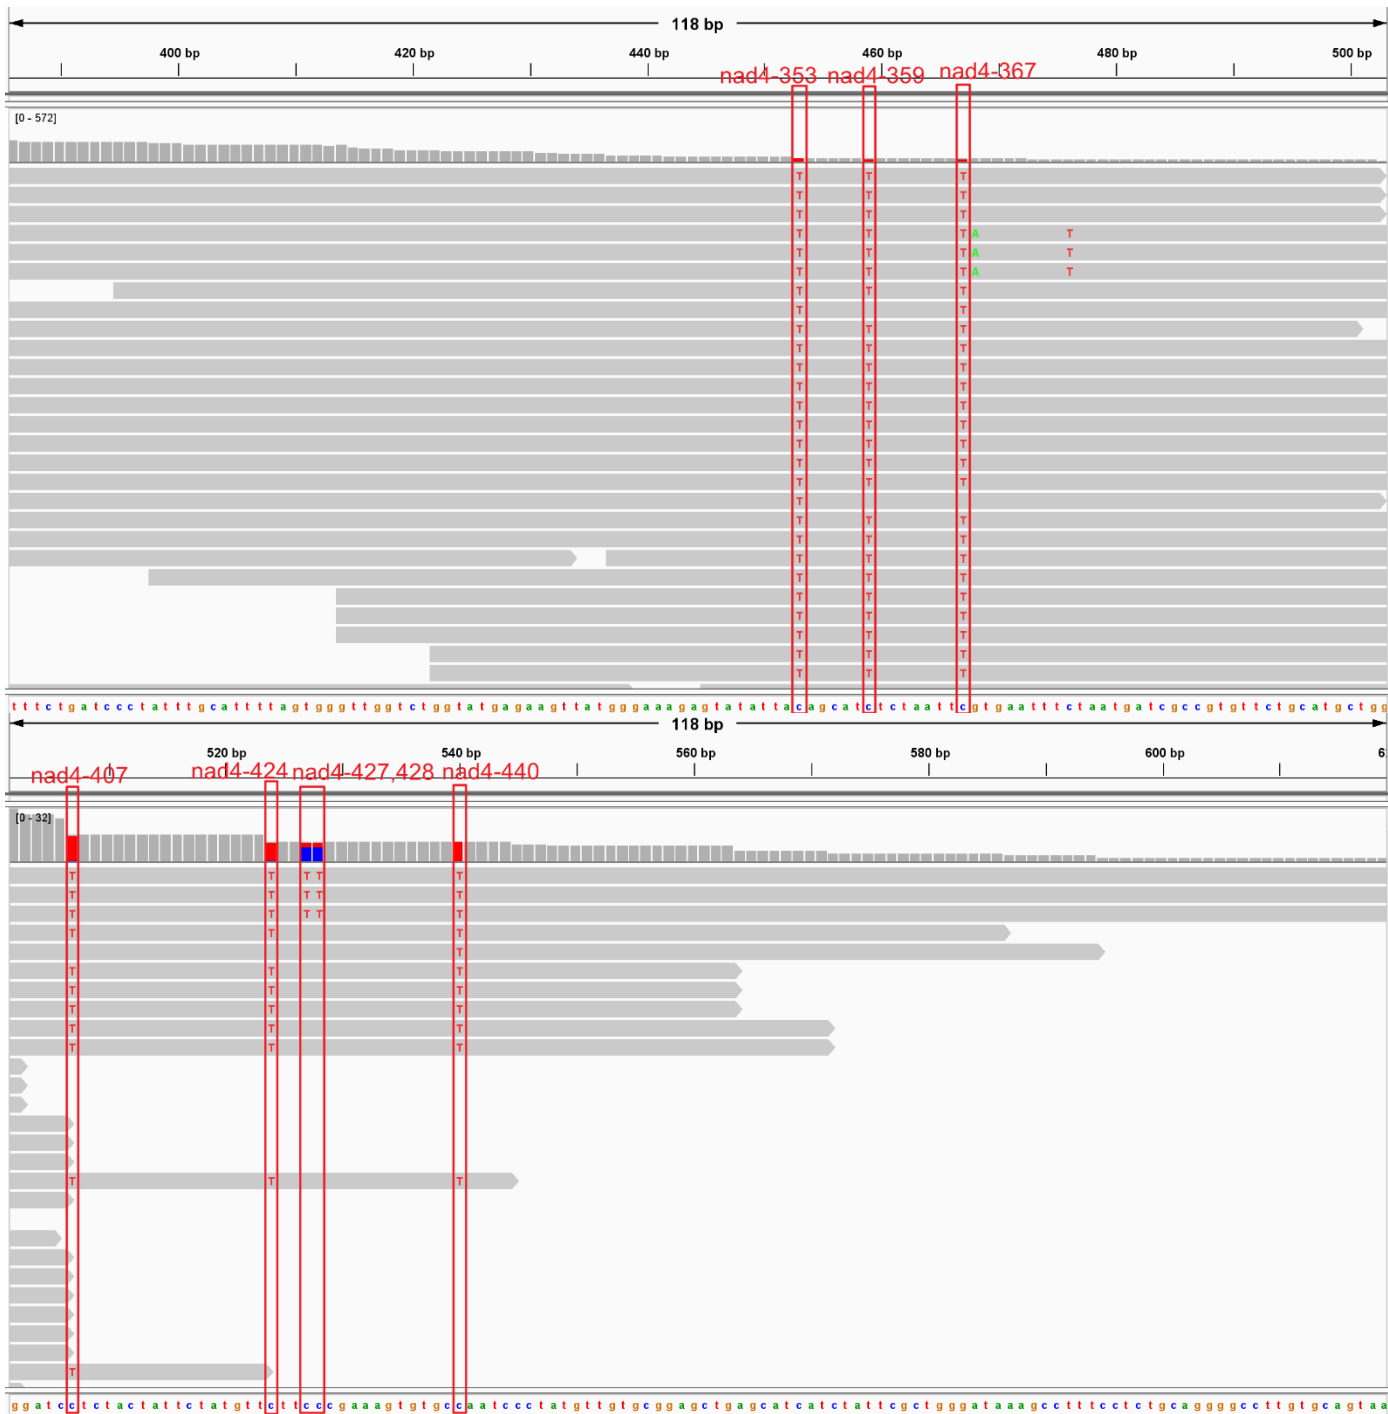



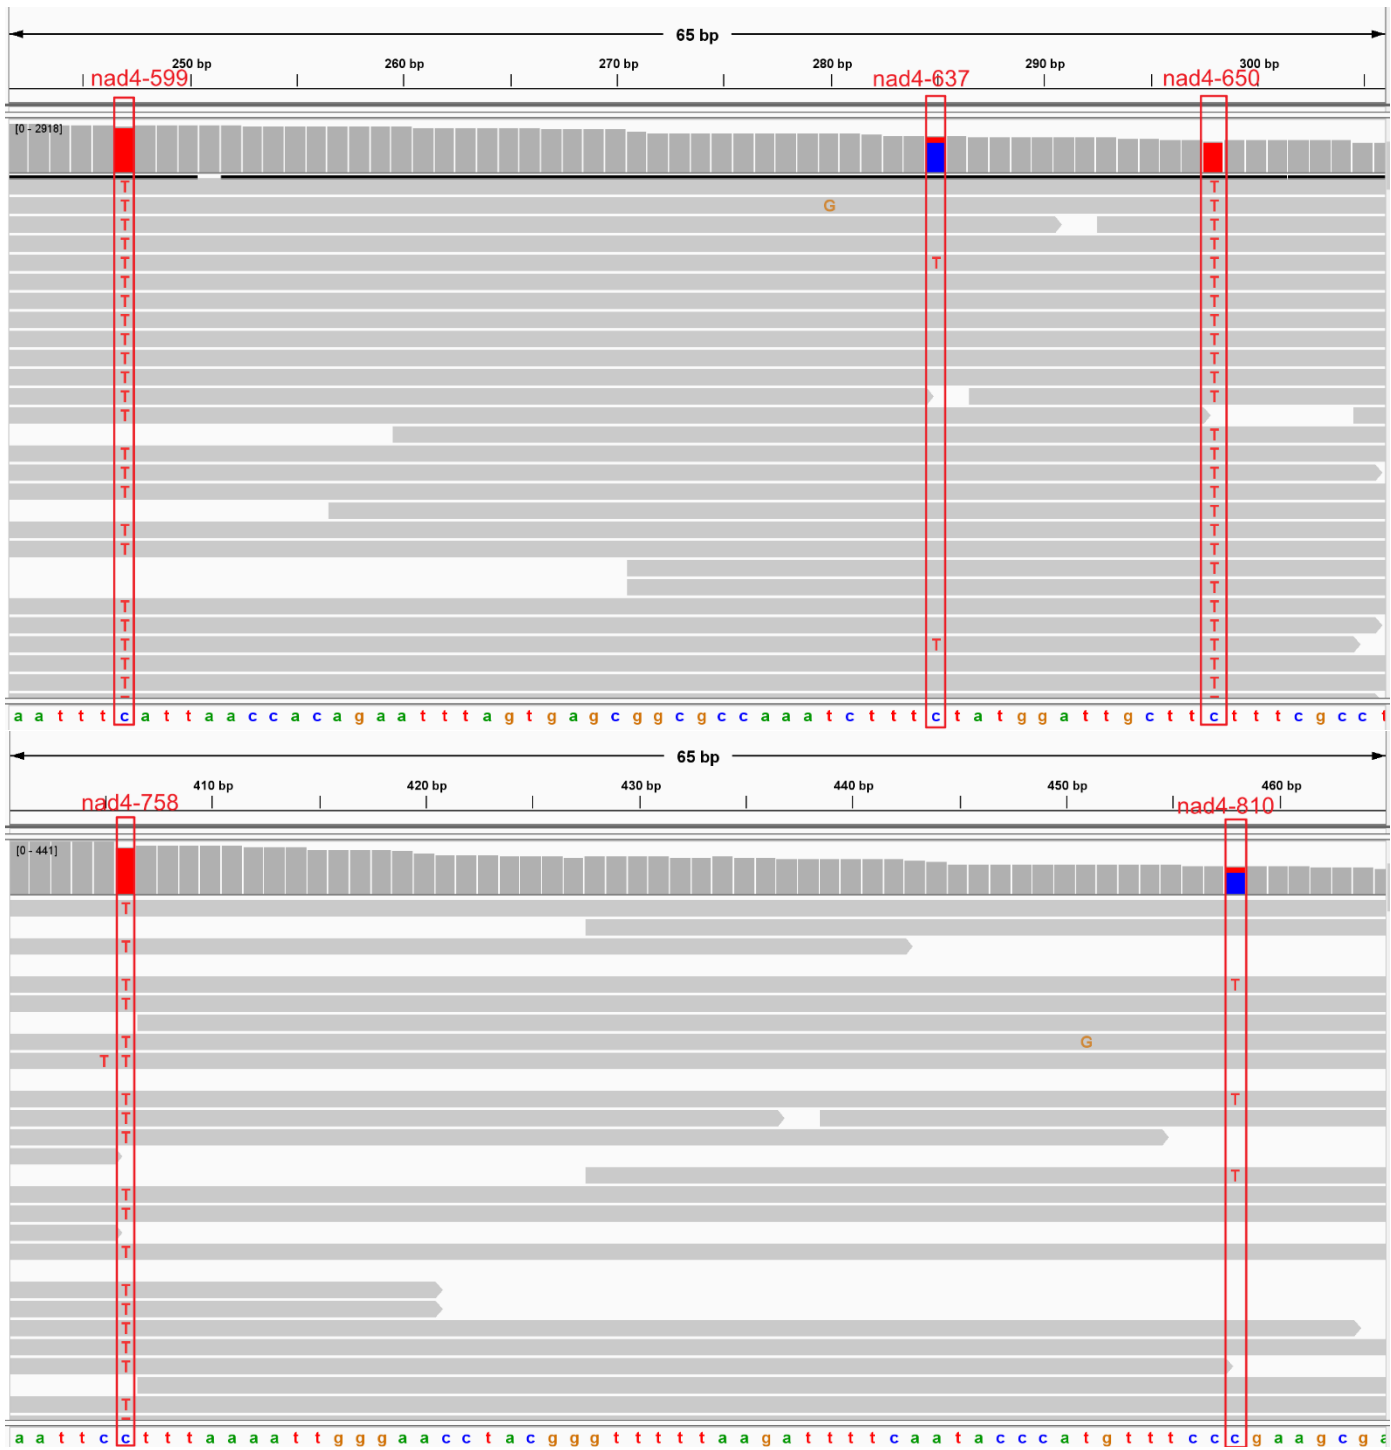

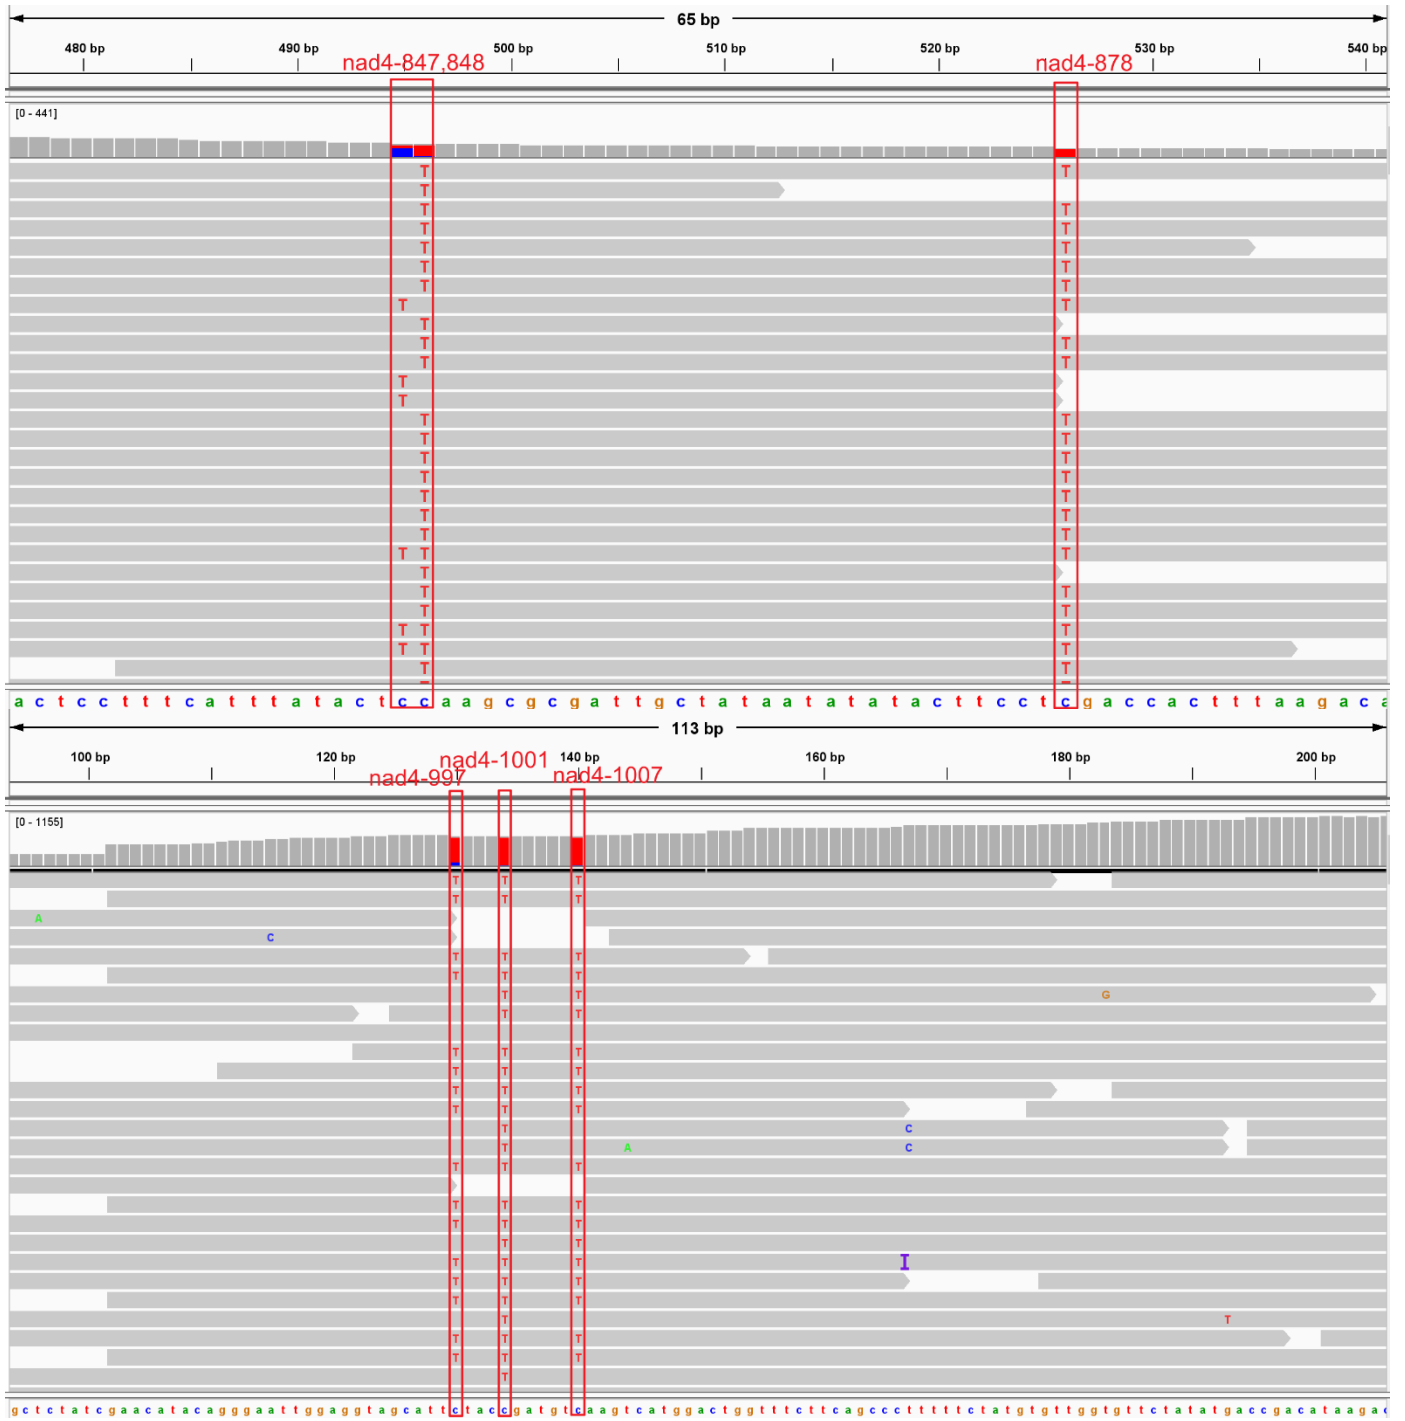

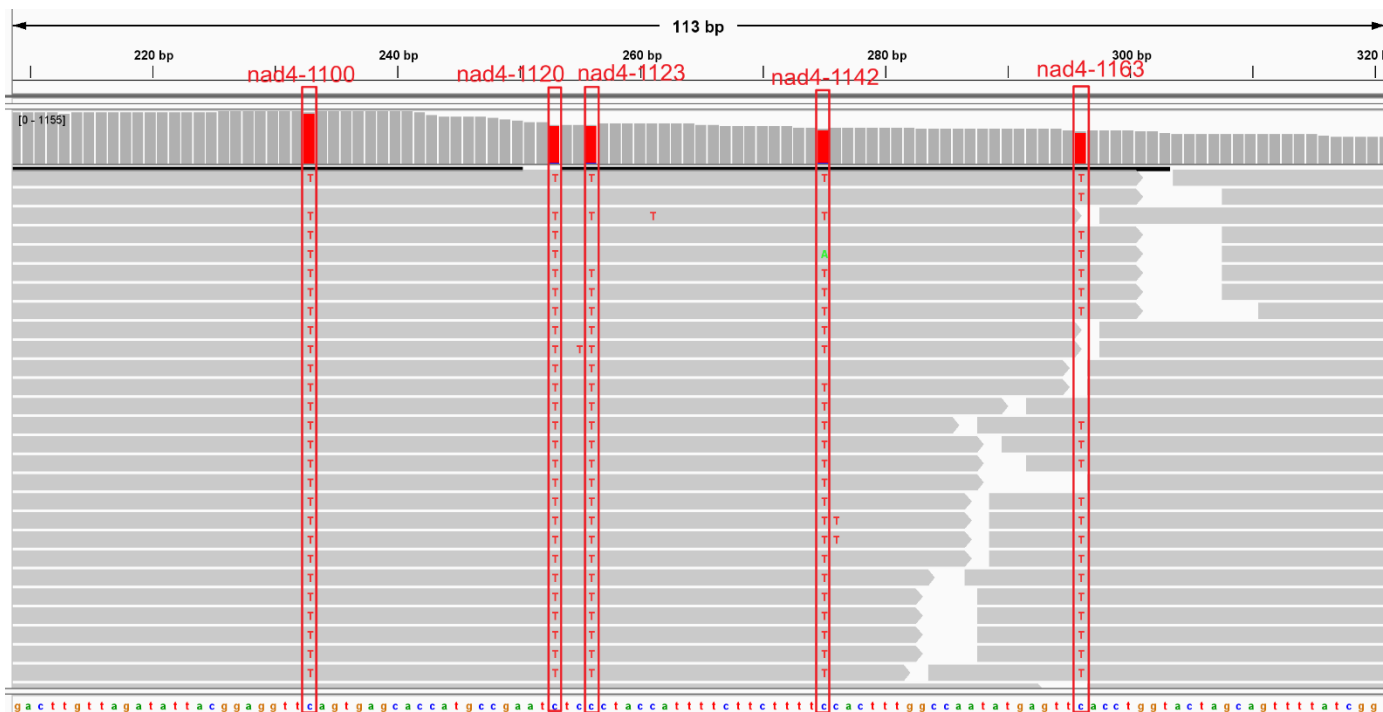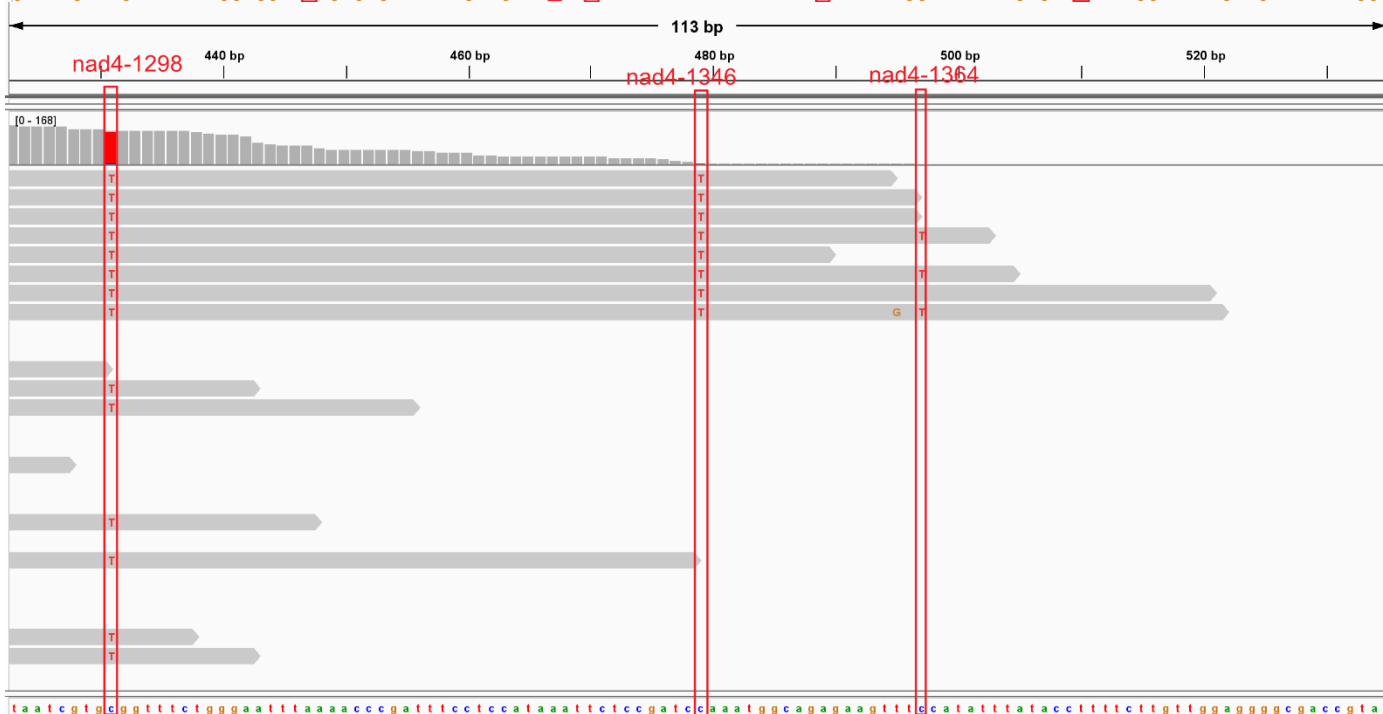

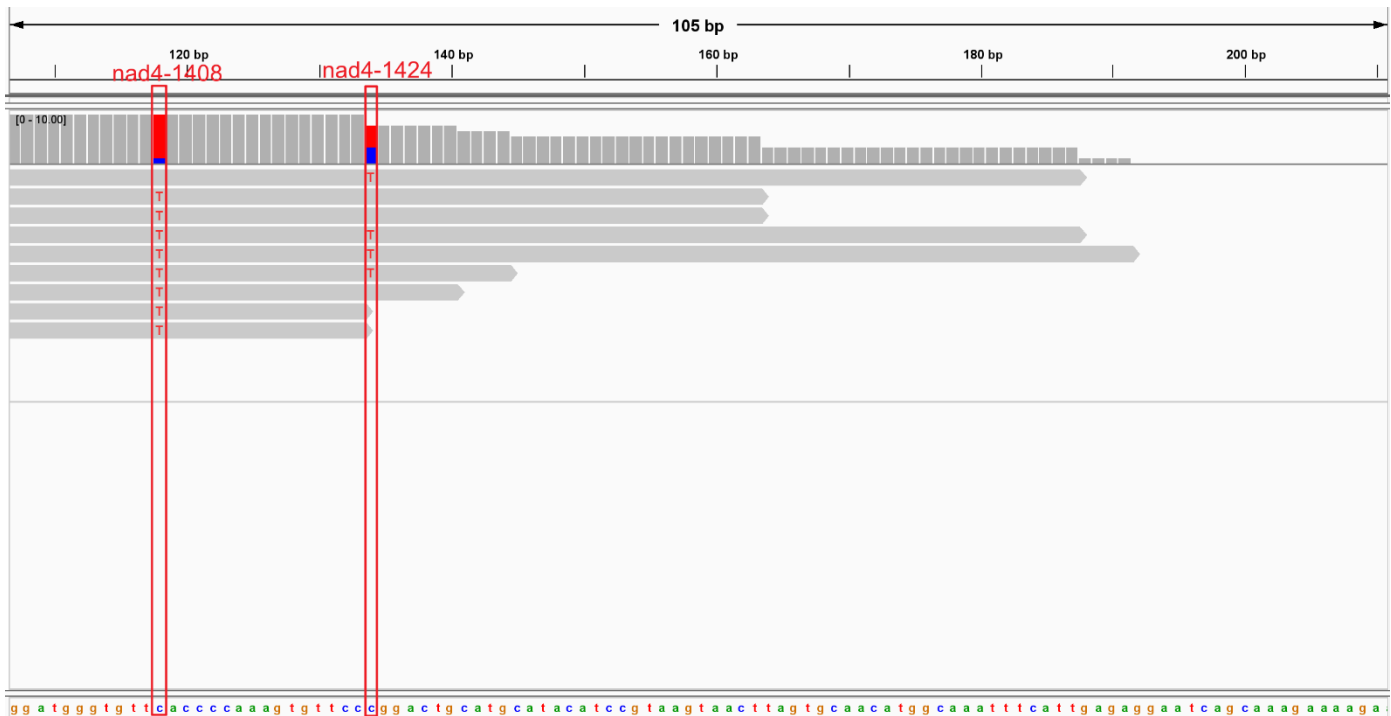

s alignment of RNA-seq reads to the coding sequence of *nad4L*. 14 RNA-seq editing sites: *nad4L*-11, 17, 25, 56, 65, 70, 80, 101, 128, 149, 158, 167, 222, 251 were highlighted in red squares.

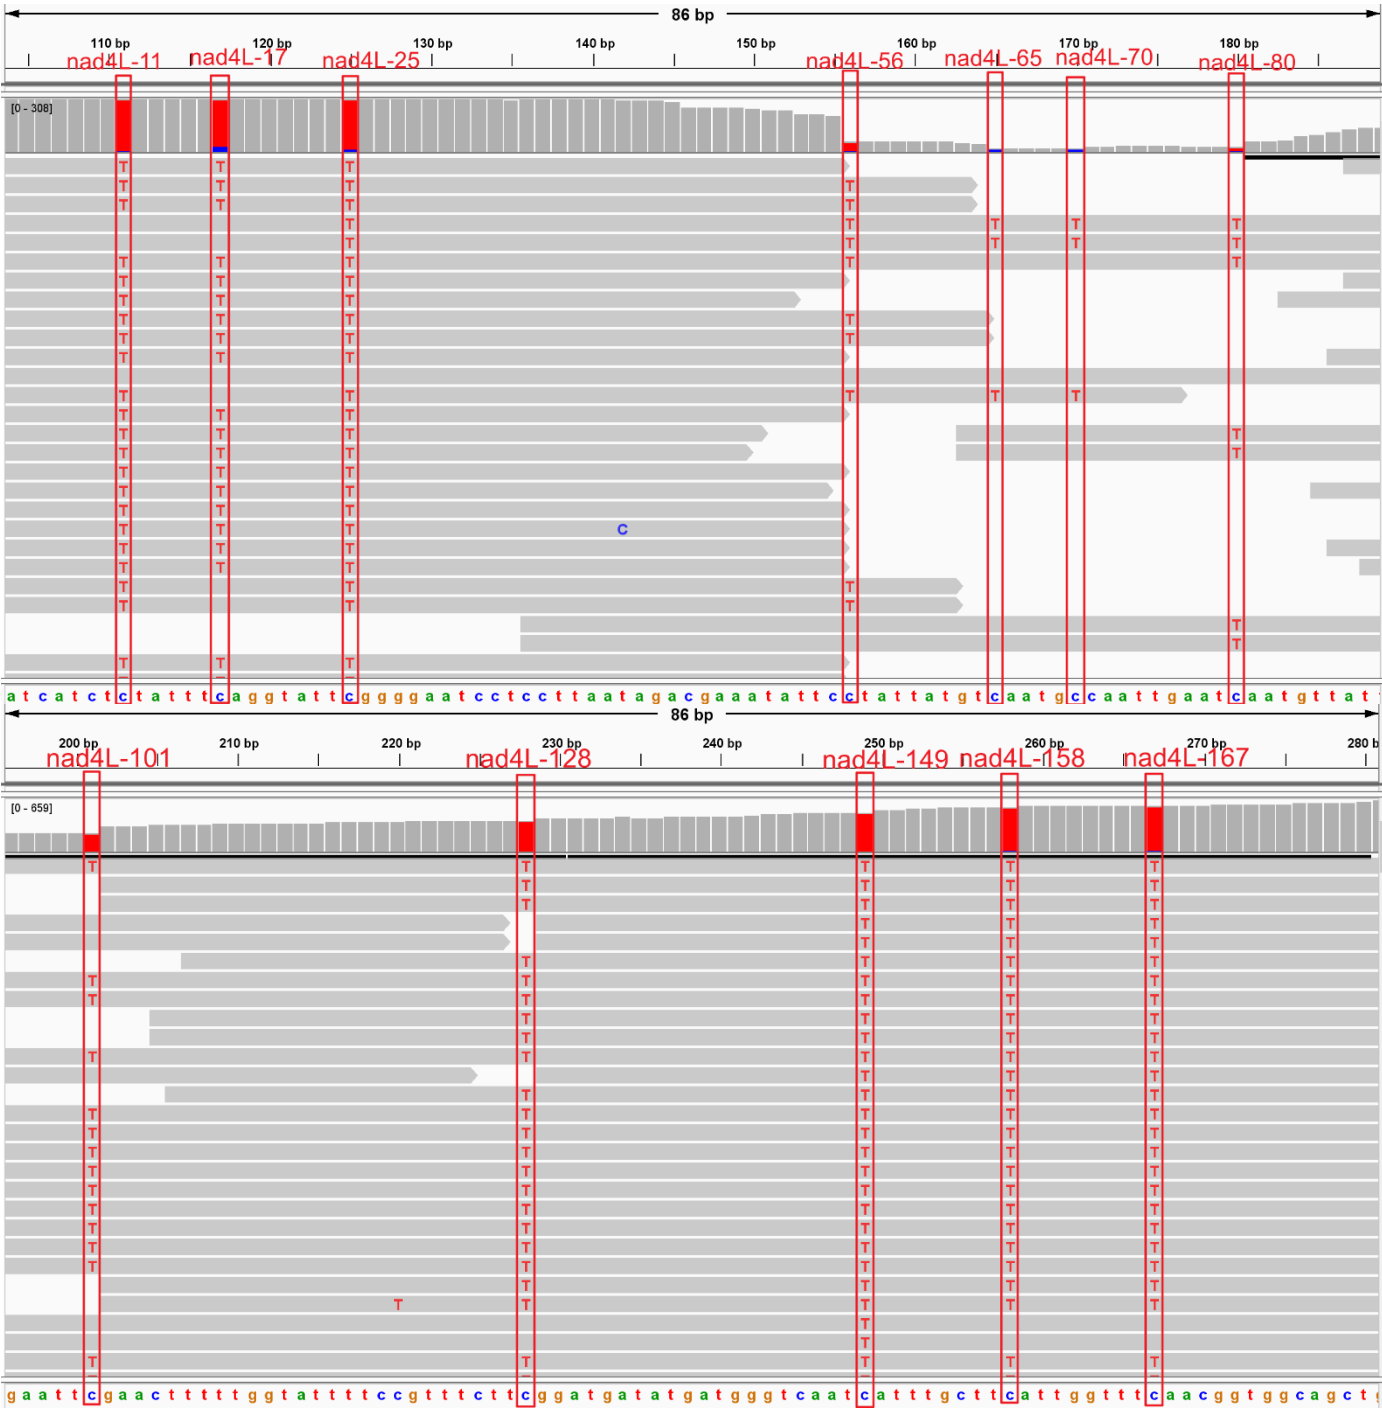

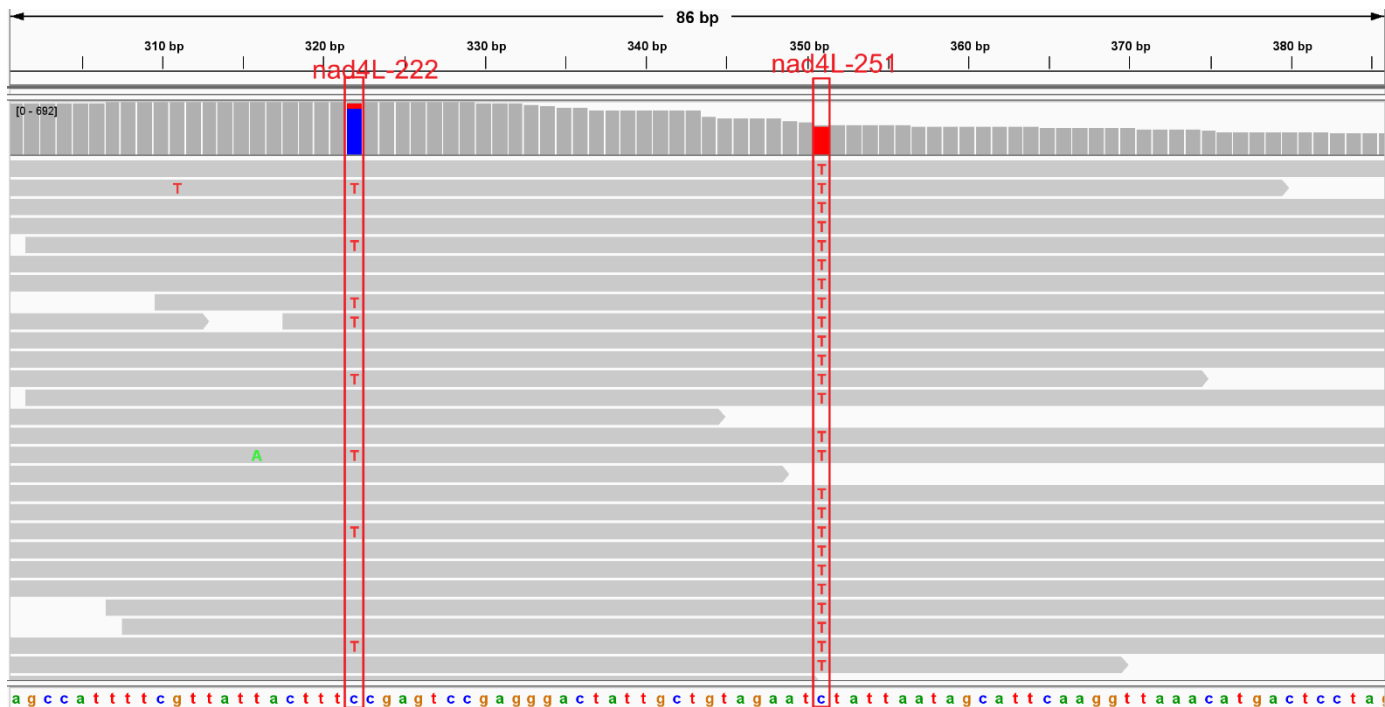

t alignment of RNA-seq reads to the coding sequence of *nad5*. 27 RNA-seq editing sites: *nad5*-155, 242, 359, 374, 398, 539, 548, 608, 609, 629, 676, 713, 725, 835, 1310, 1490, 1550, 1568, 1580, 1589, 1610, 1695, 1895, 1916, 1918, 1958, 1981 were highlighted in red squares.

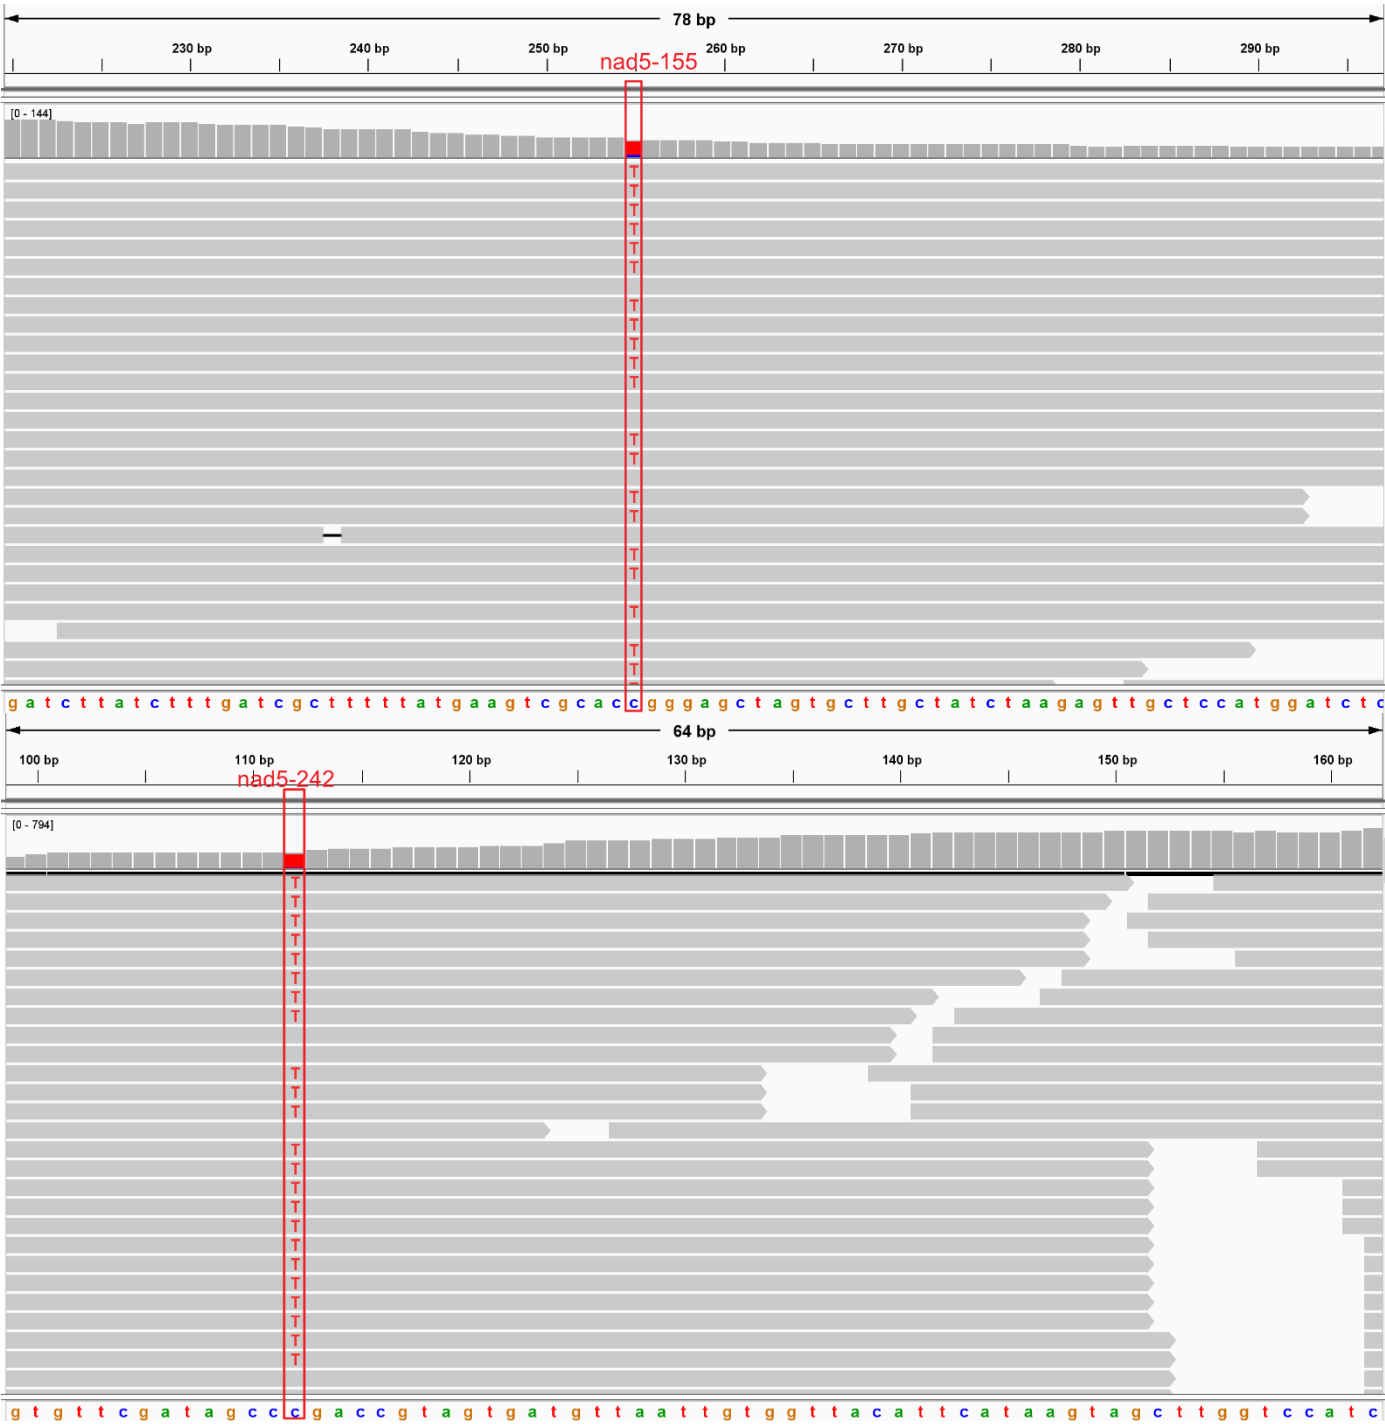

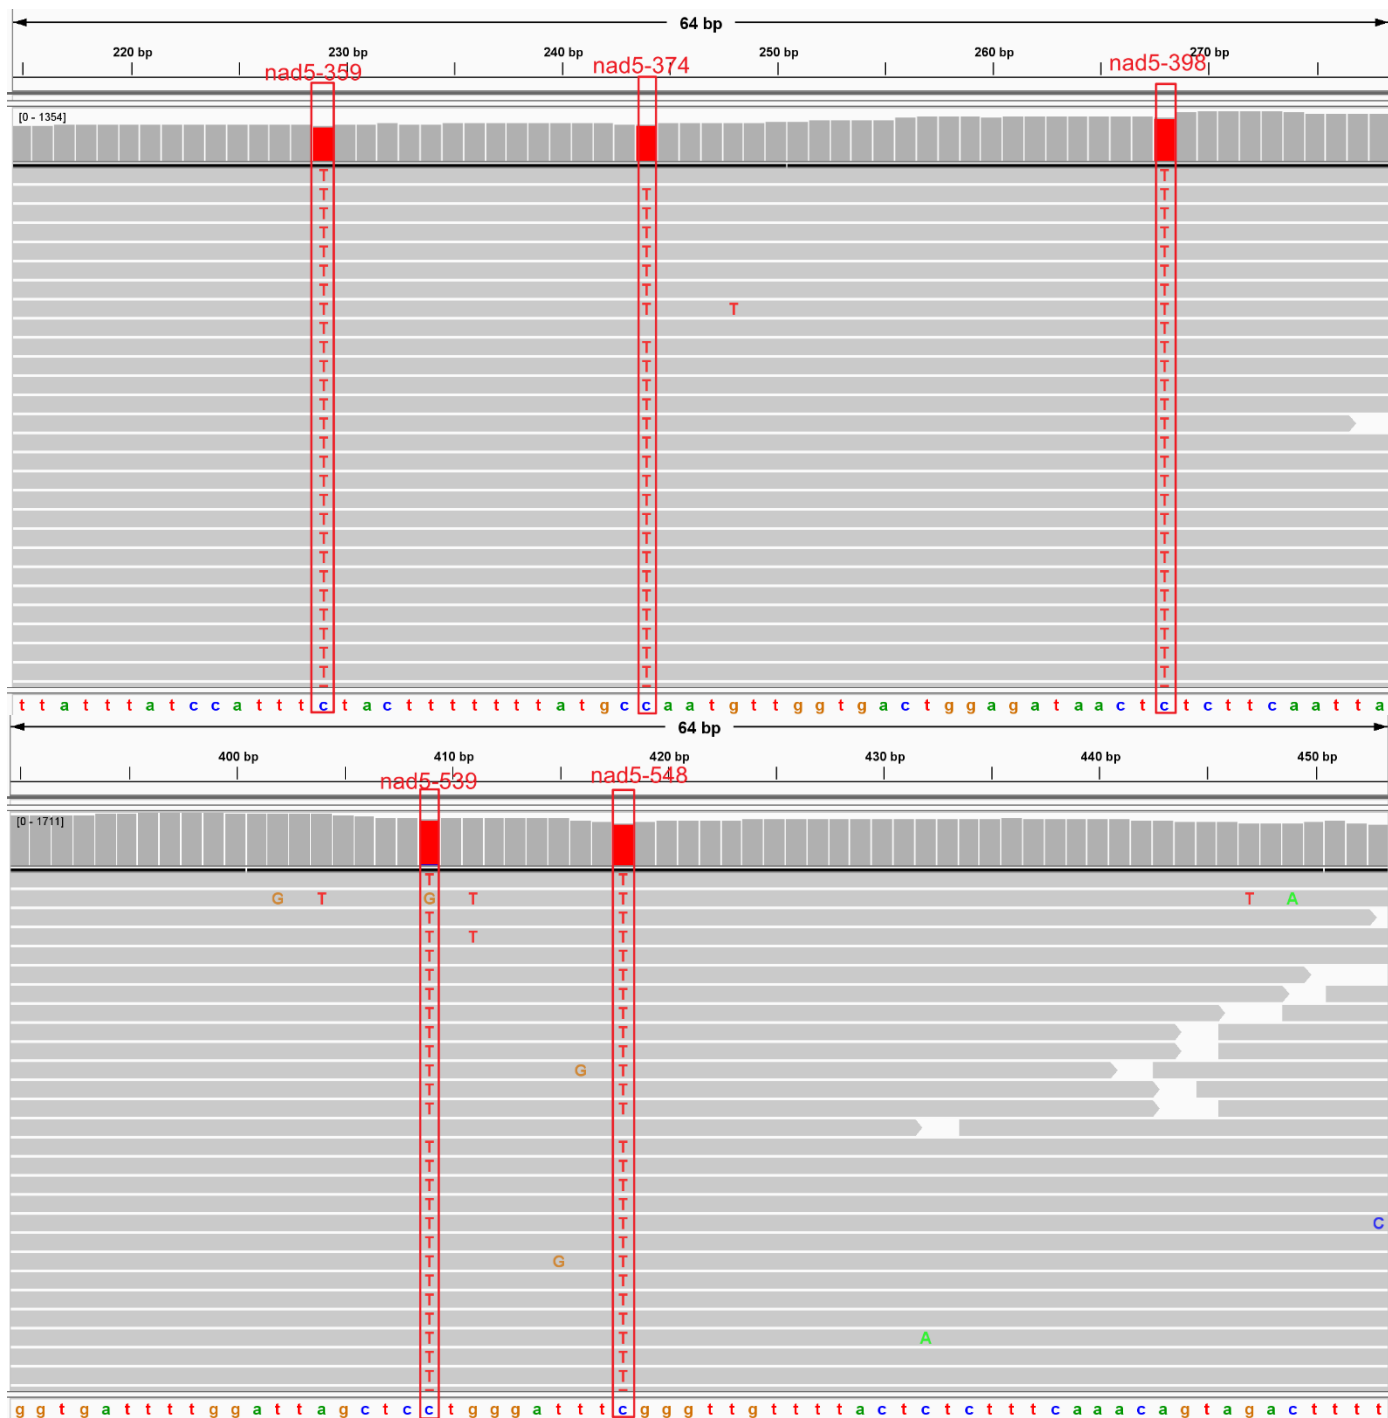



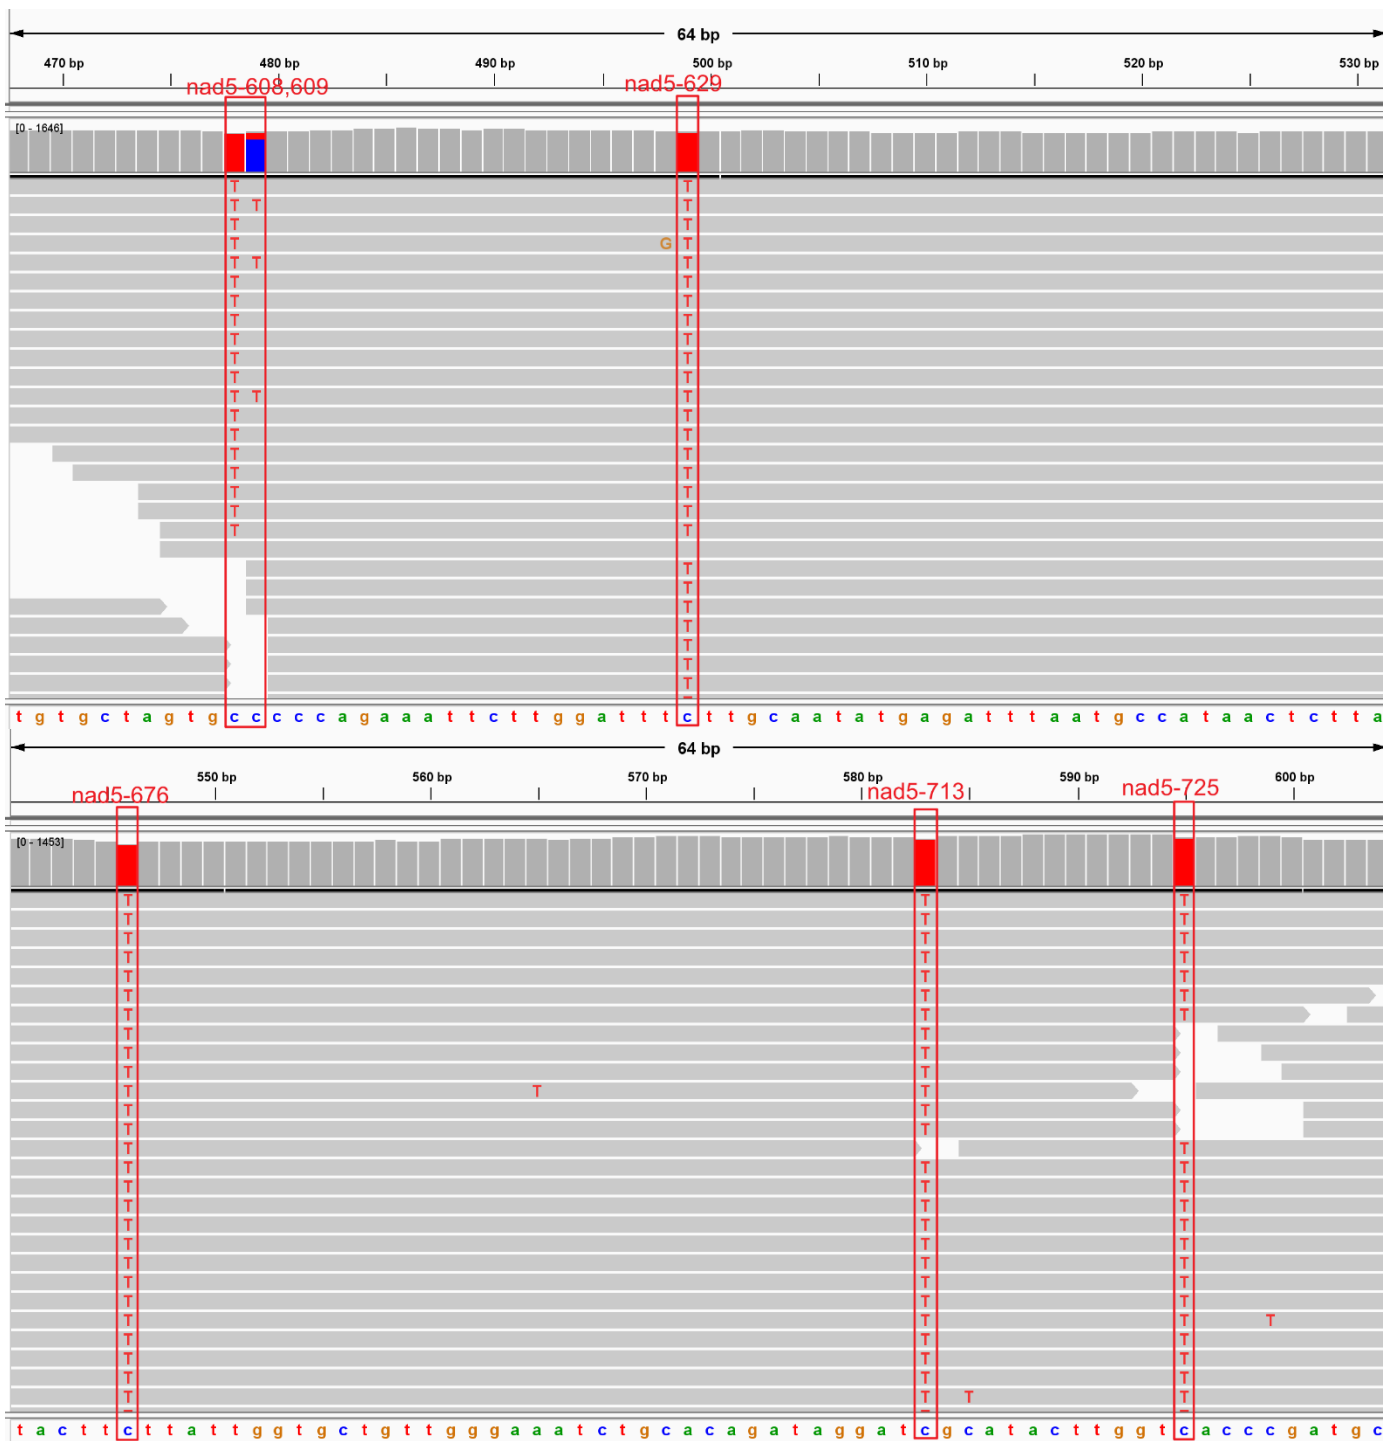

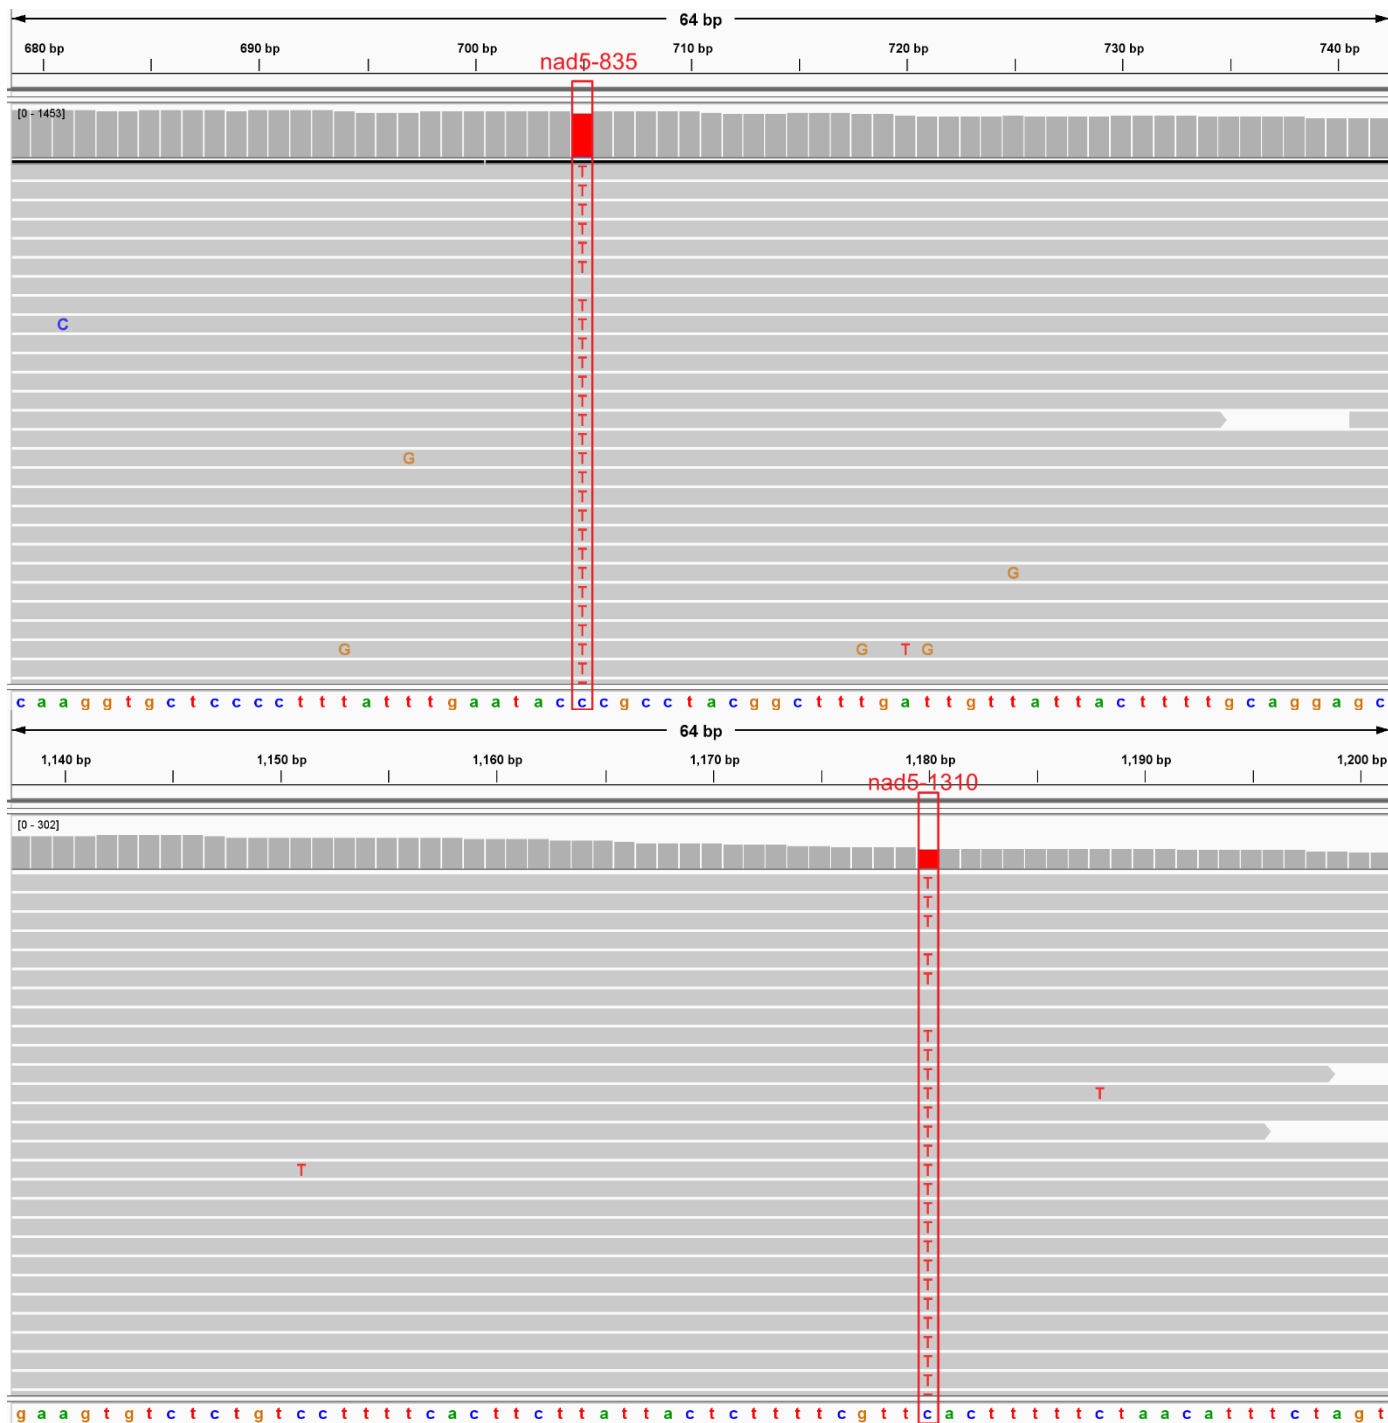

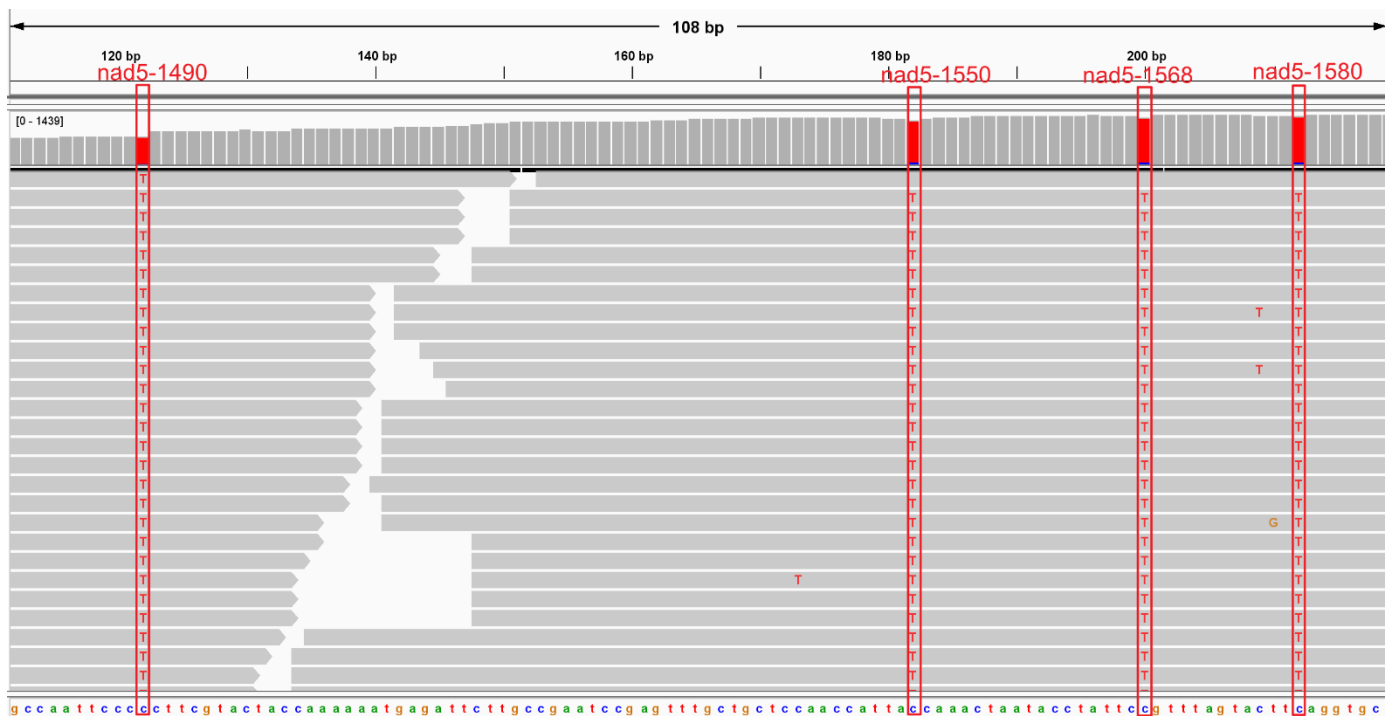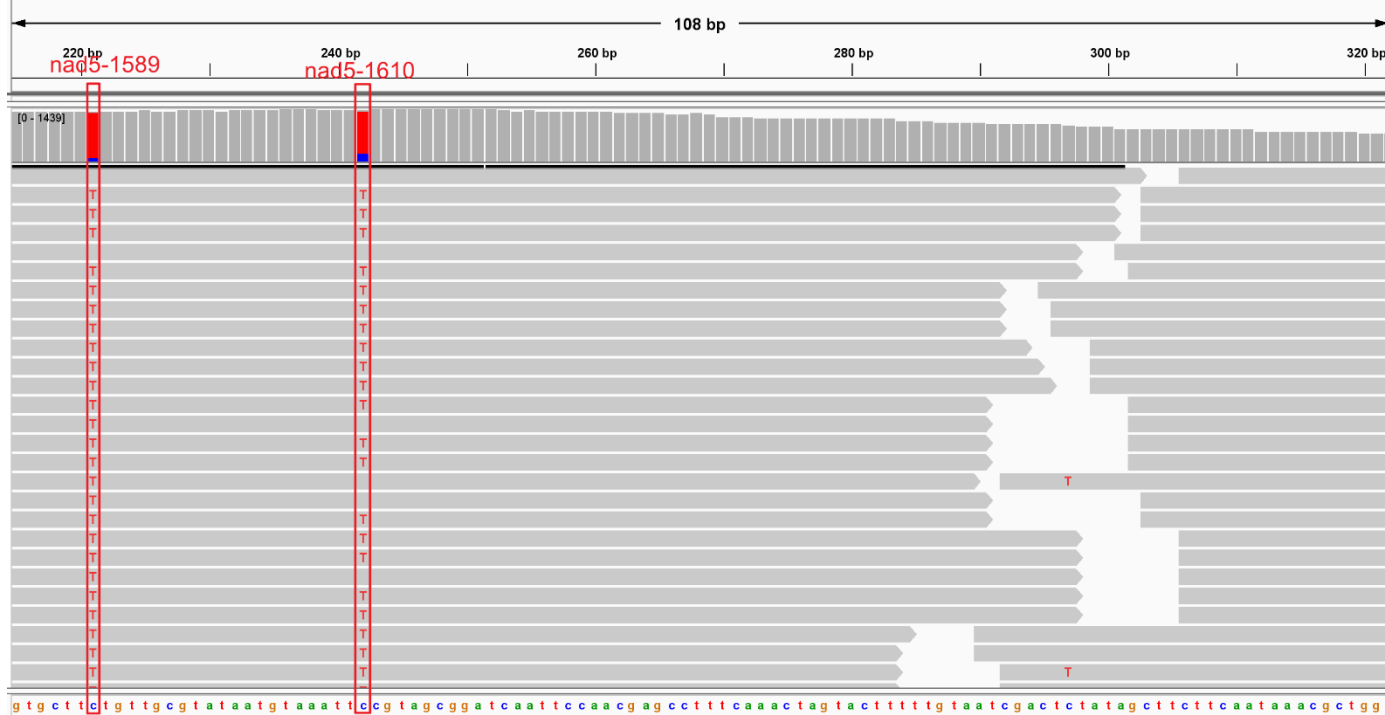

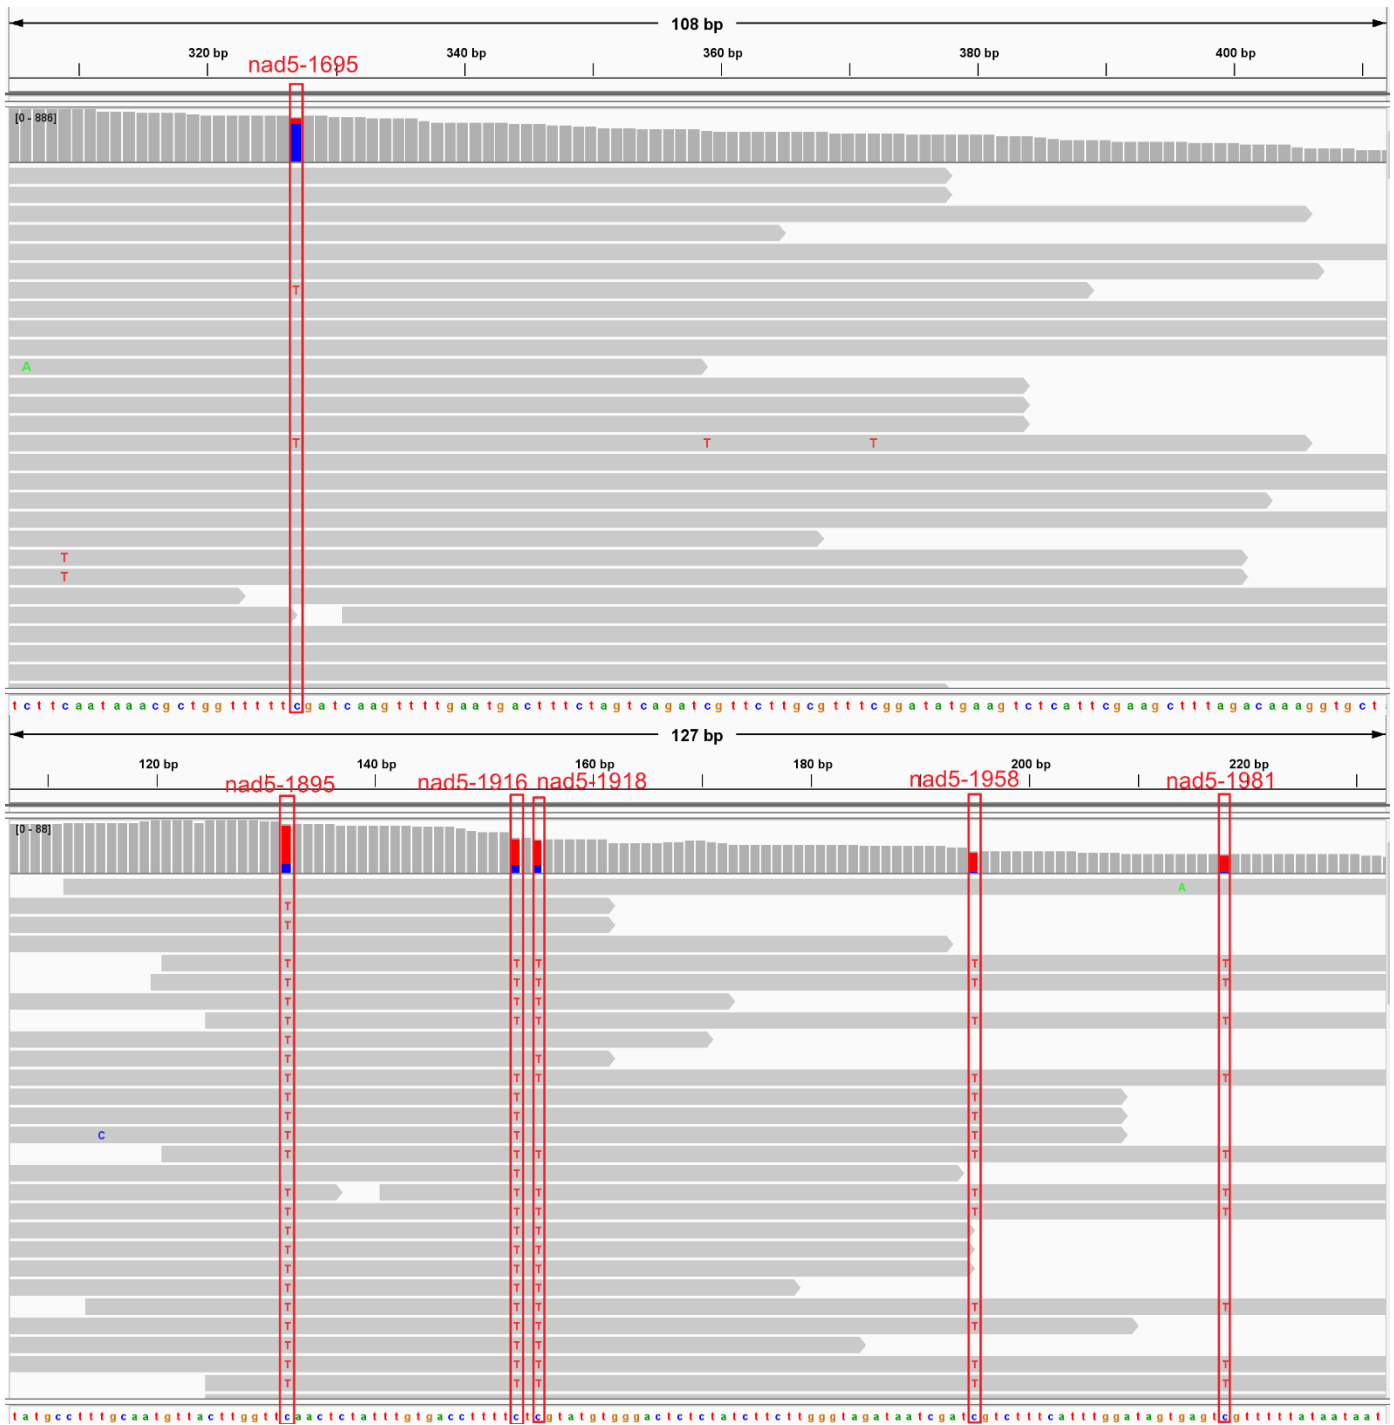

u alignment of RNA-seq reads to the coding sequence of *nad6*. 11 RNA-seq editing sites: *nad6*-26, 88, 89, 95, 103, 161, 169, 191, 306, 463, 569 were highlighted in red squares.

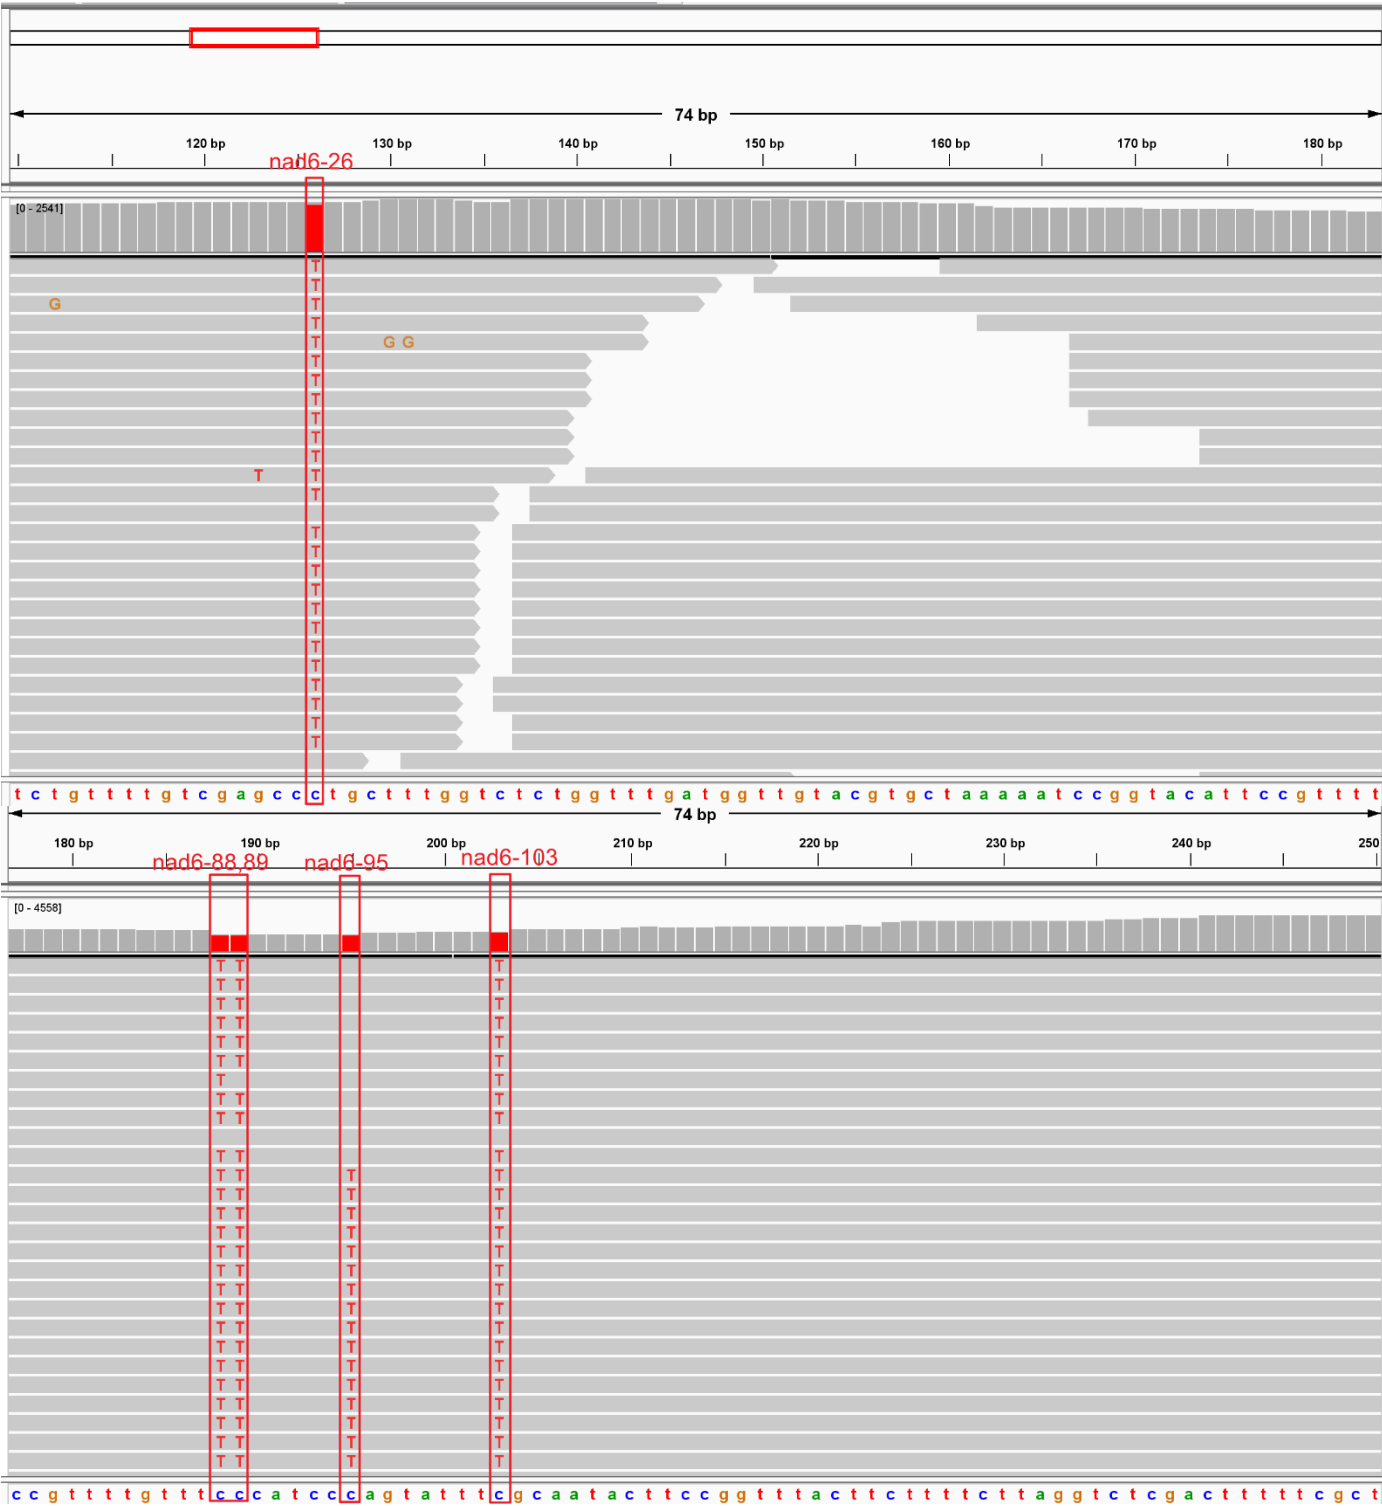

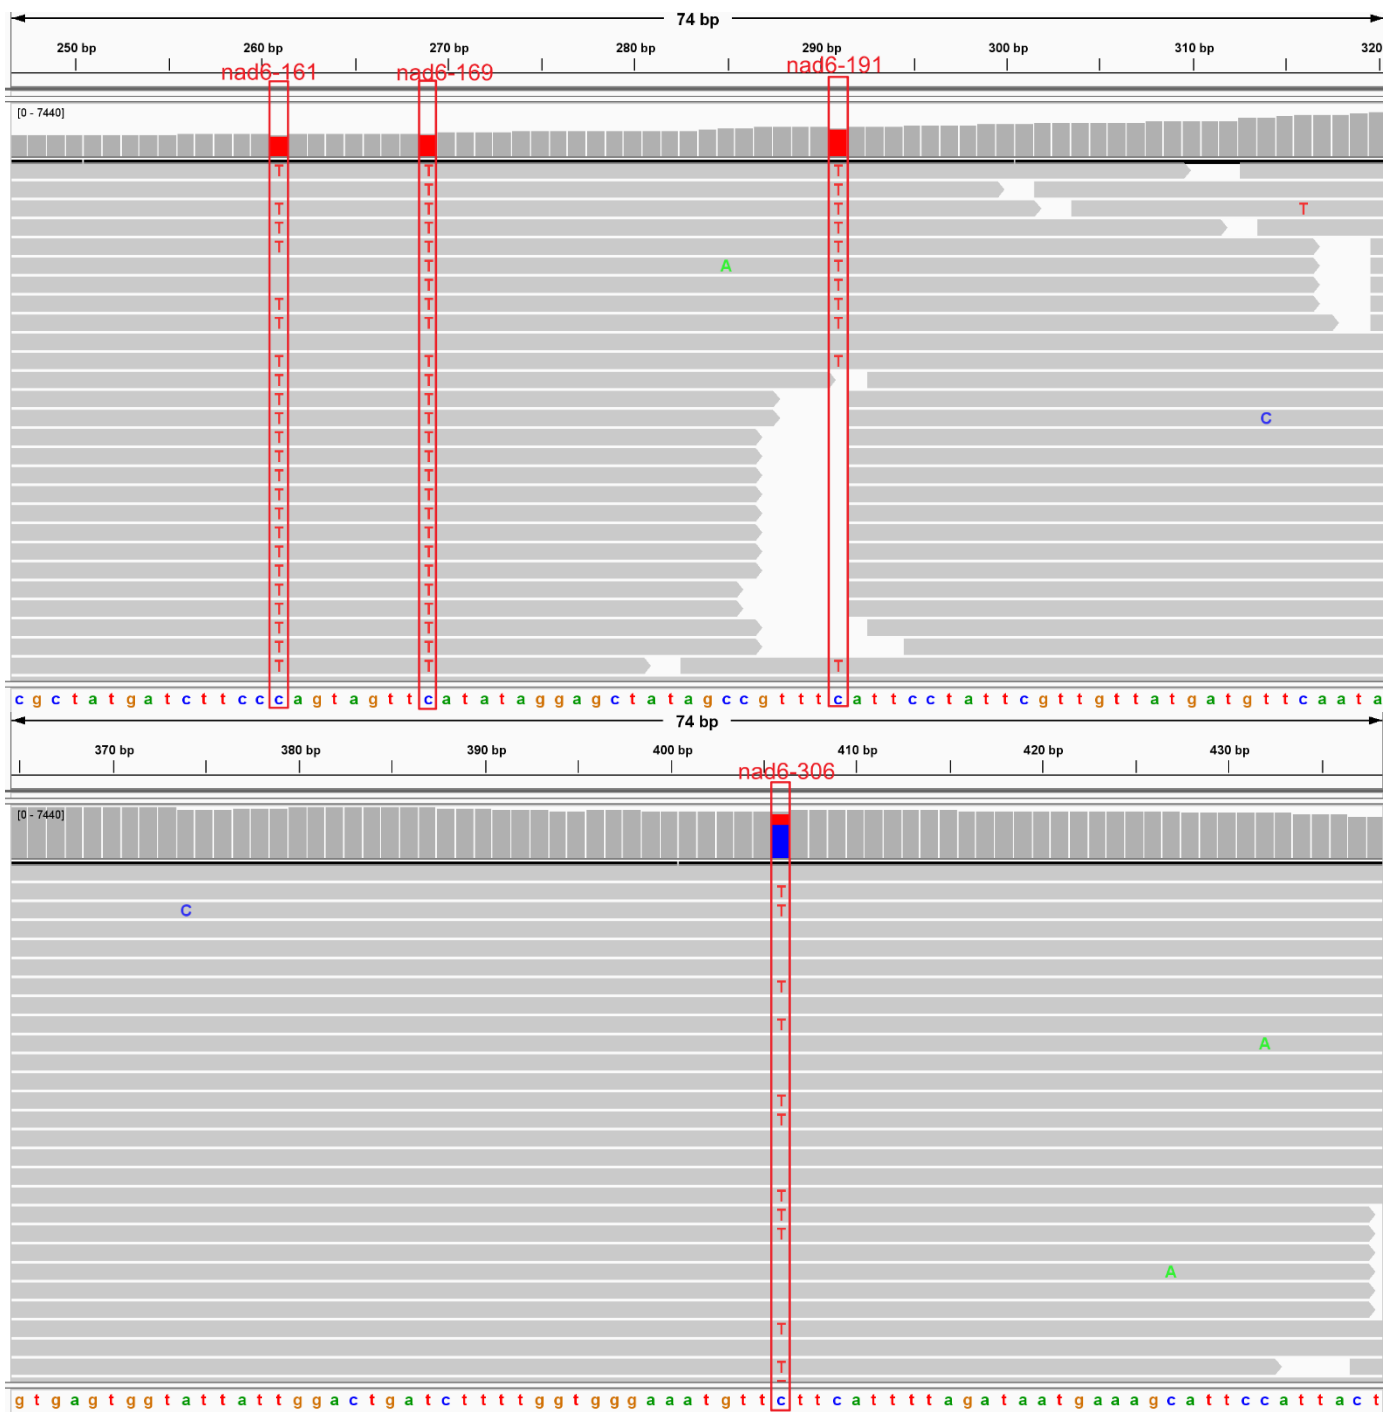

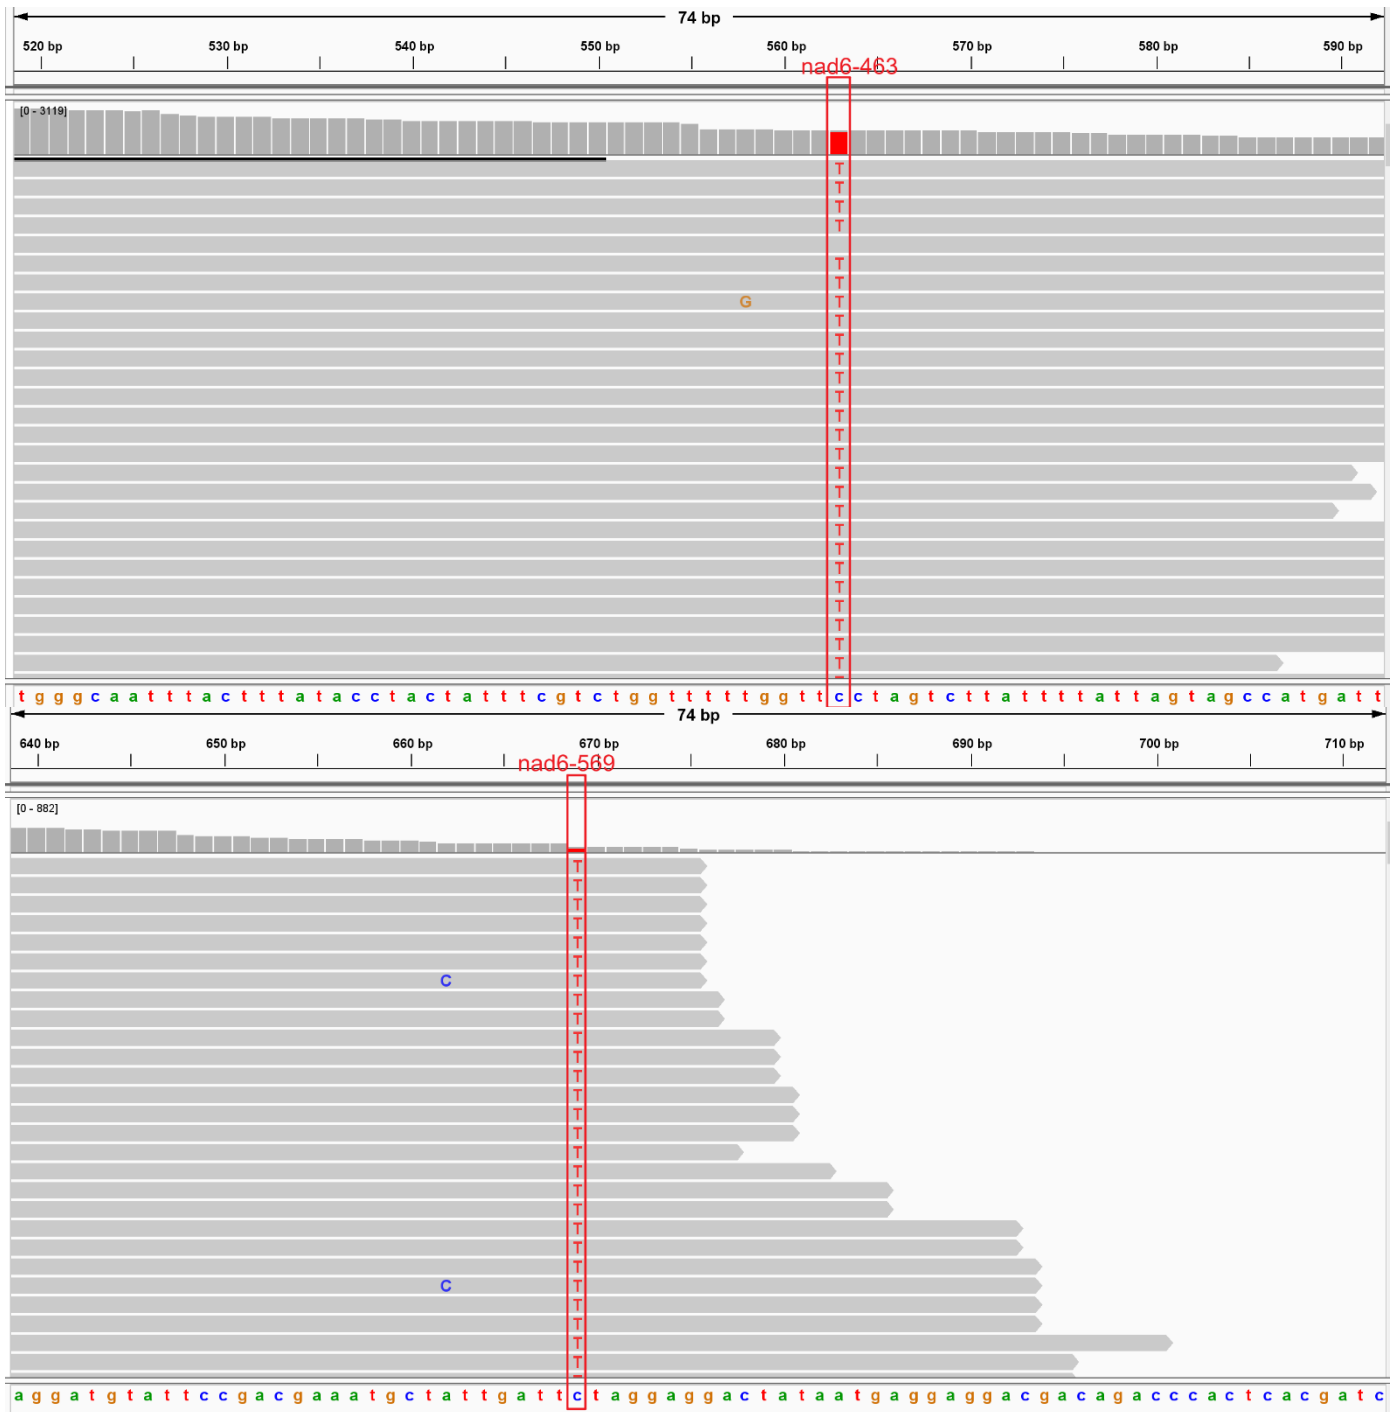

v alignment of RNA-seq reads to the coding sequence of *nad7*. 26 RNA-seq editing sites: *nad7*-45, 77, 137, 200, 209, 244, 251, 316, 335, 344, 383, 531, 534, 578, 724, 739, 740, 769, 926, 944, 1050, 1057, 1103, 1124, 1137, 1166 were highlighted in red squares.

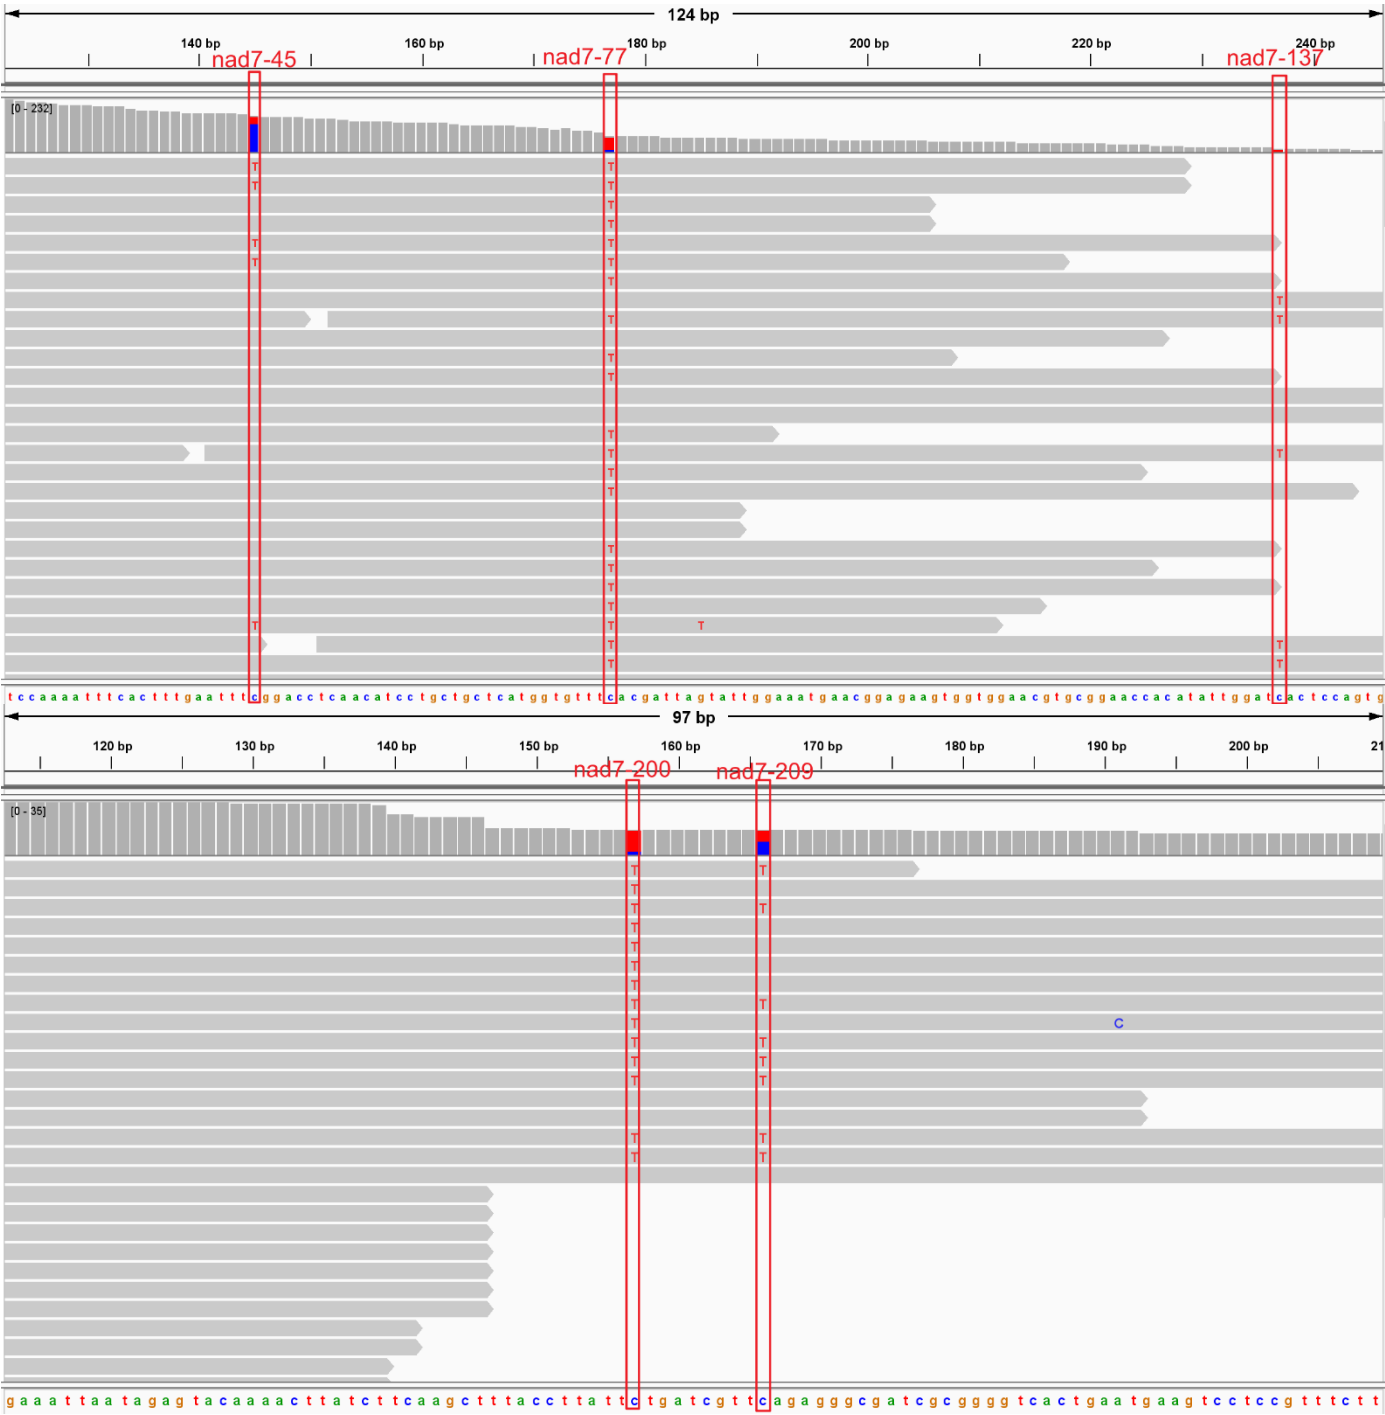



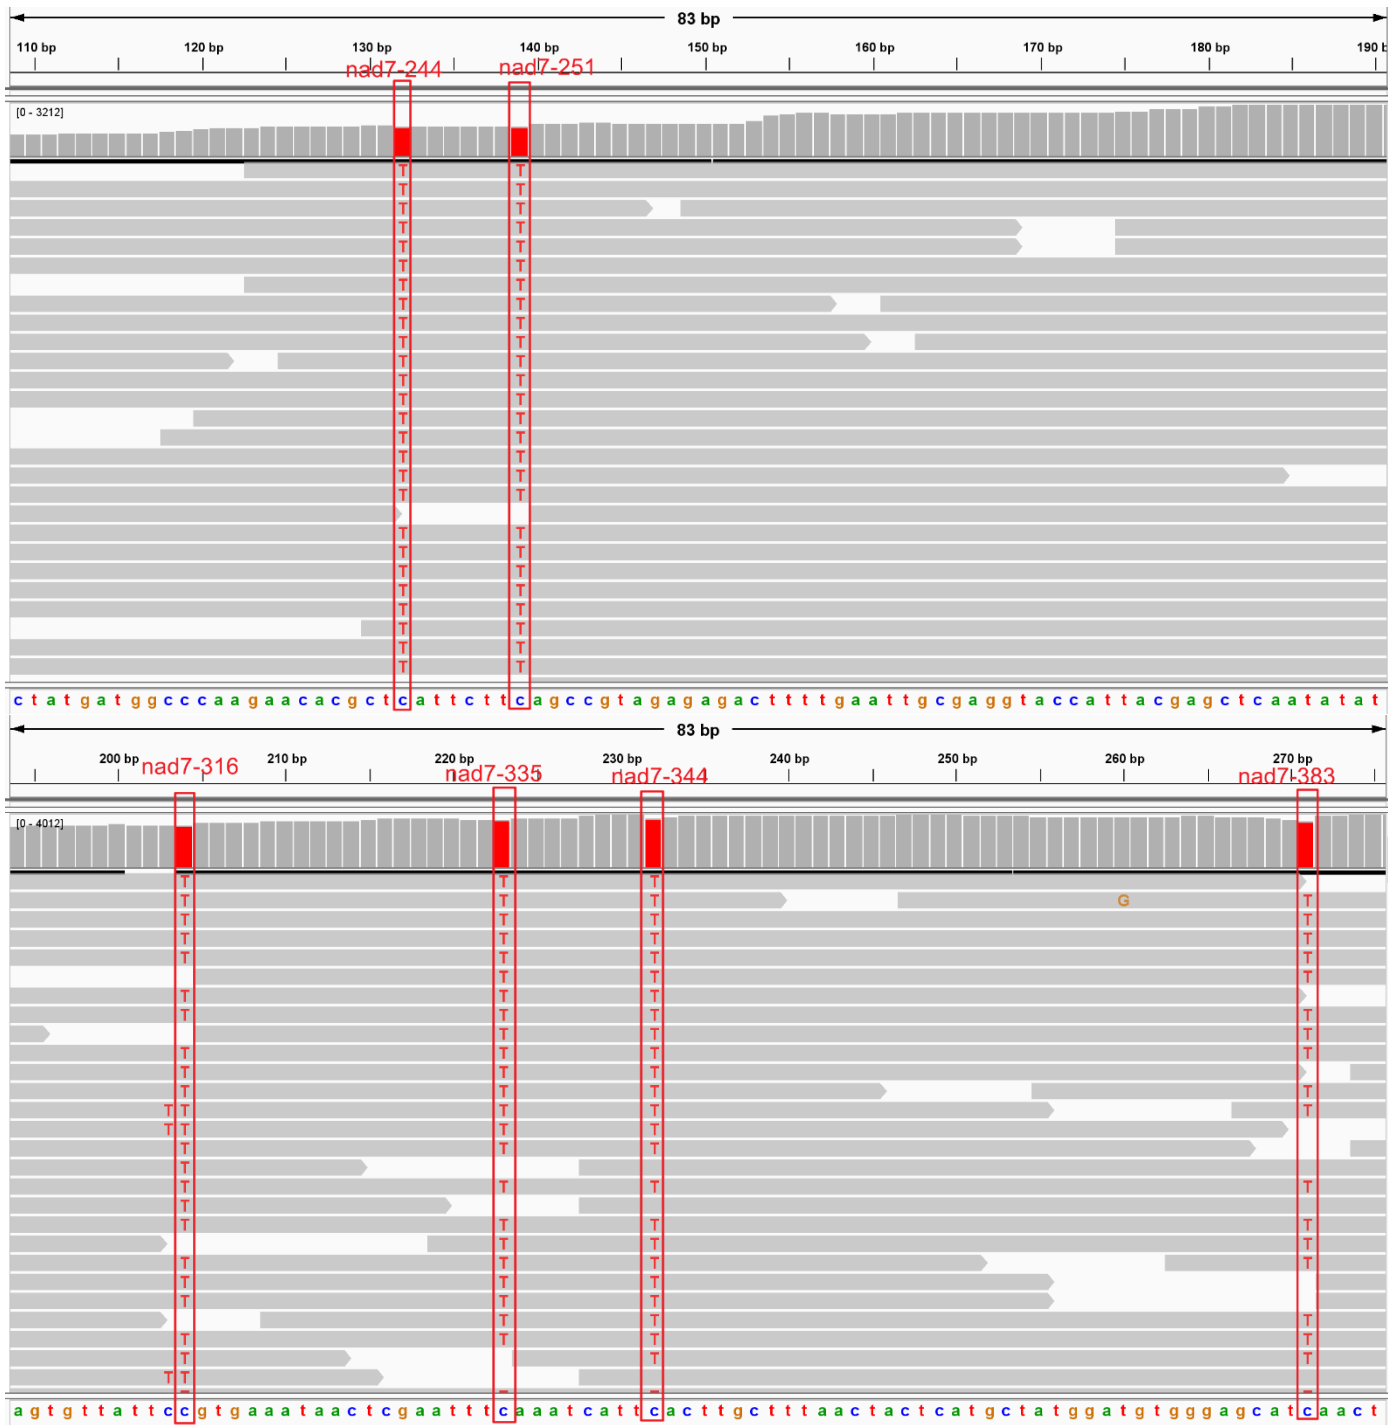

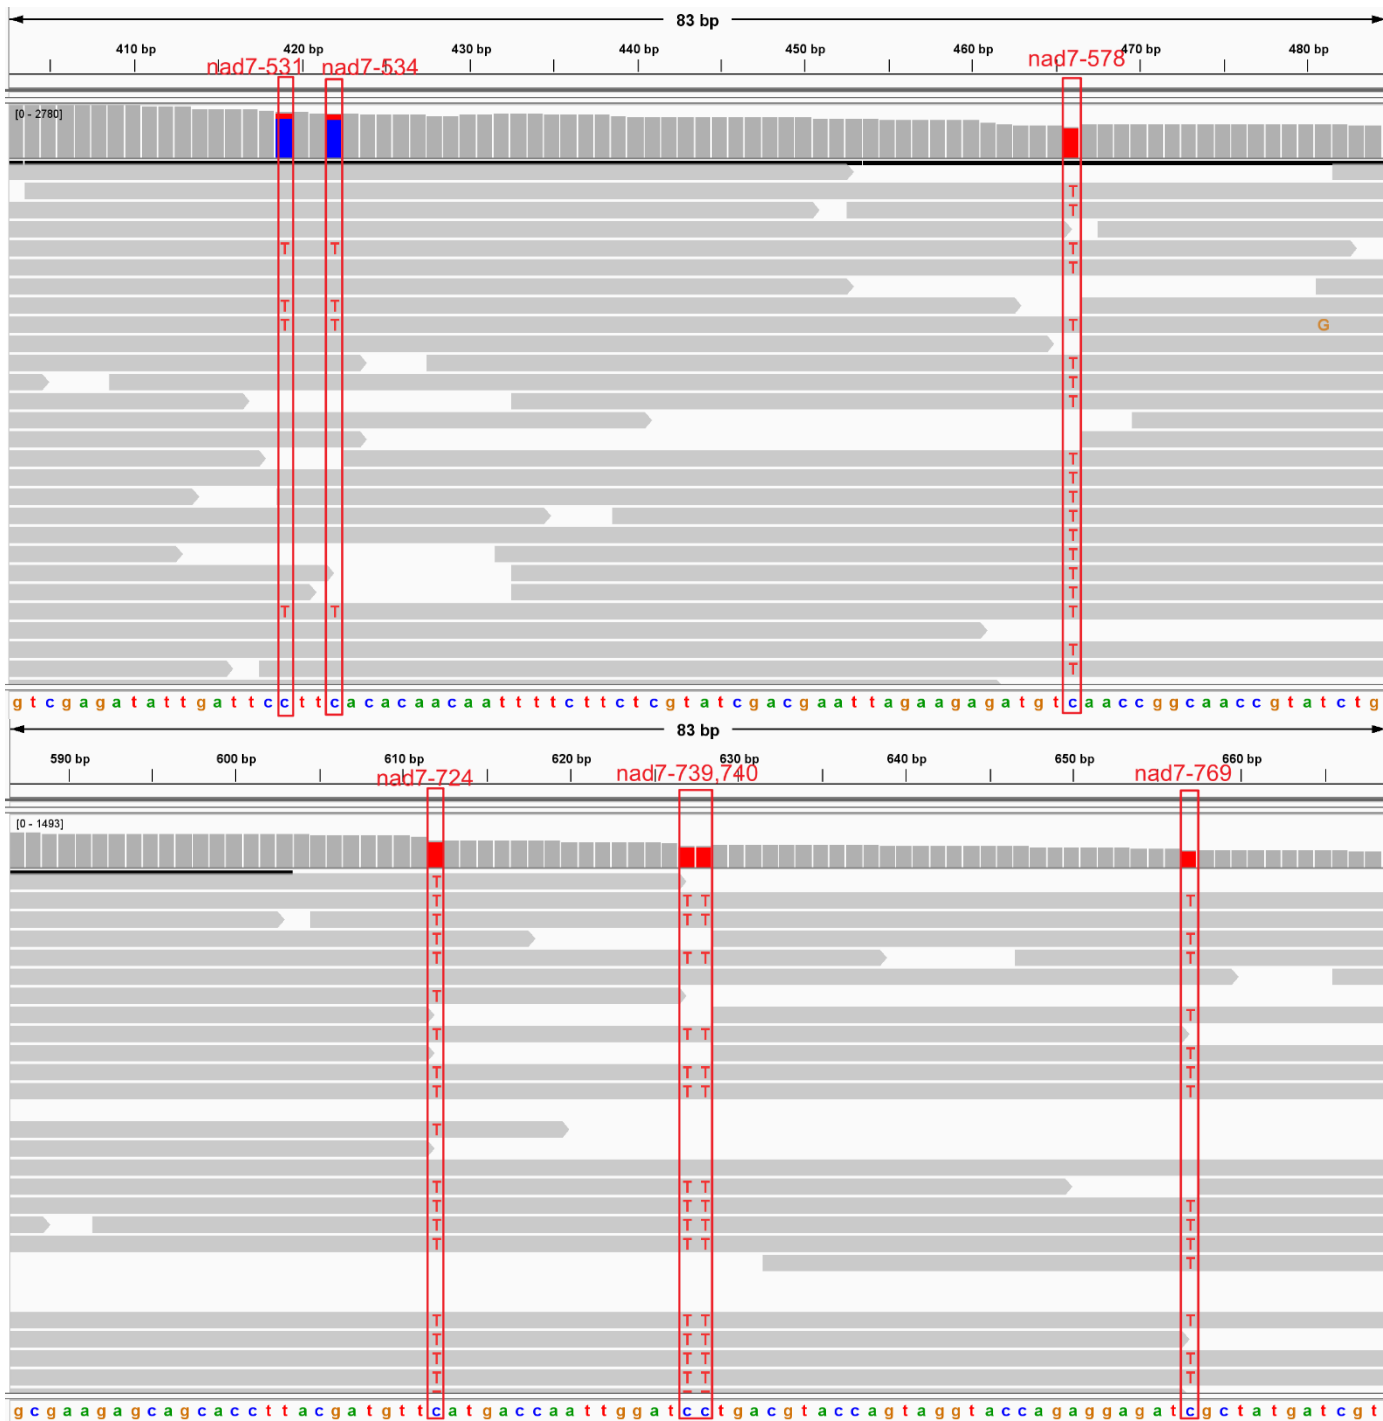

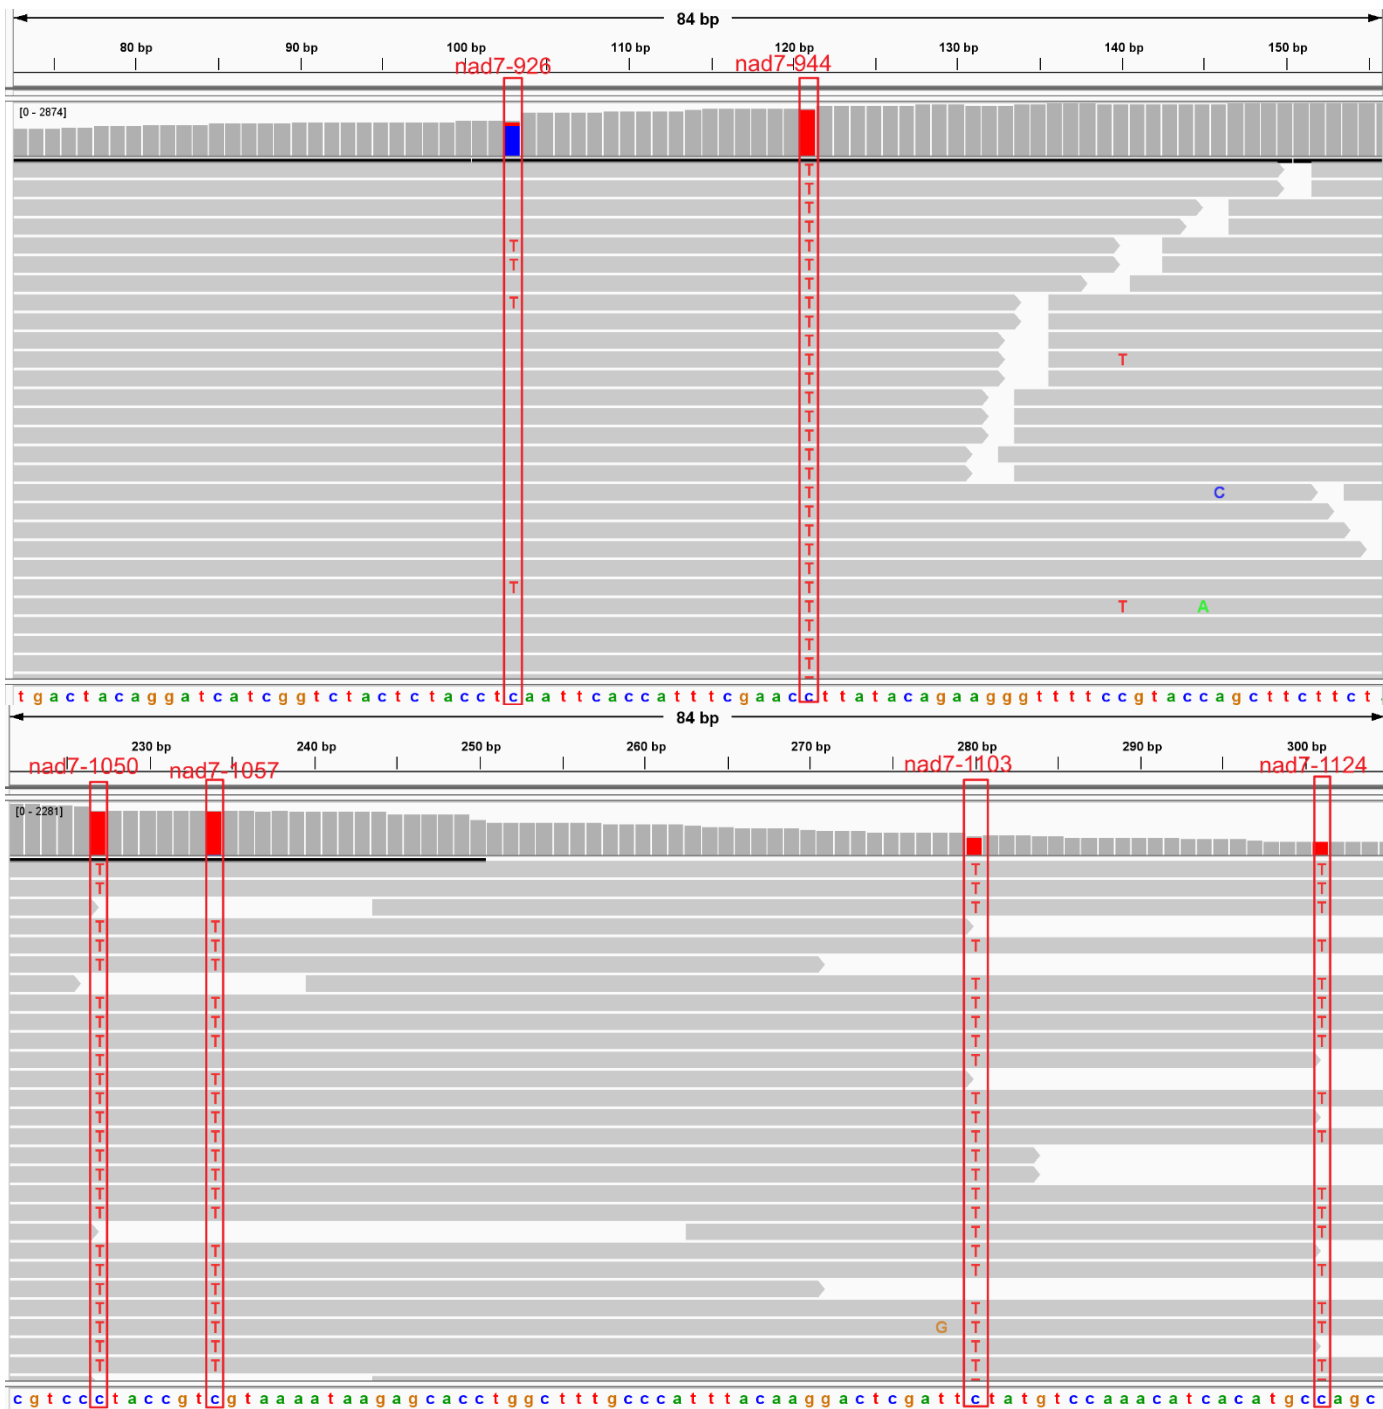

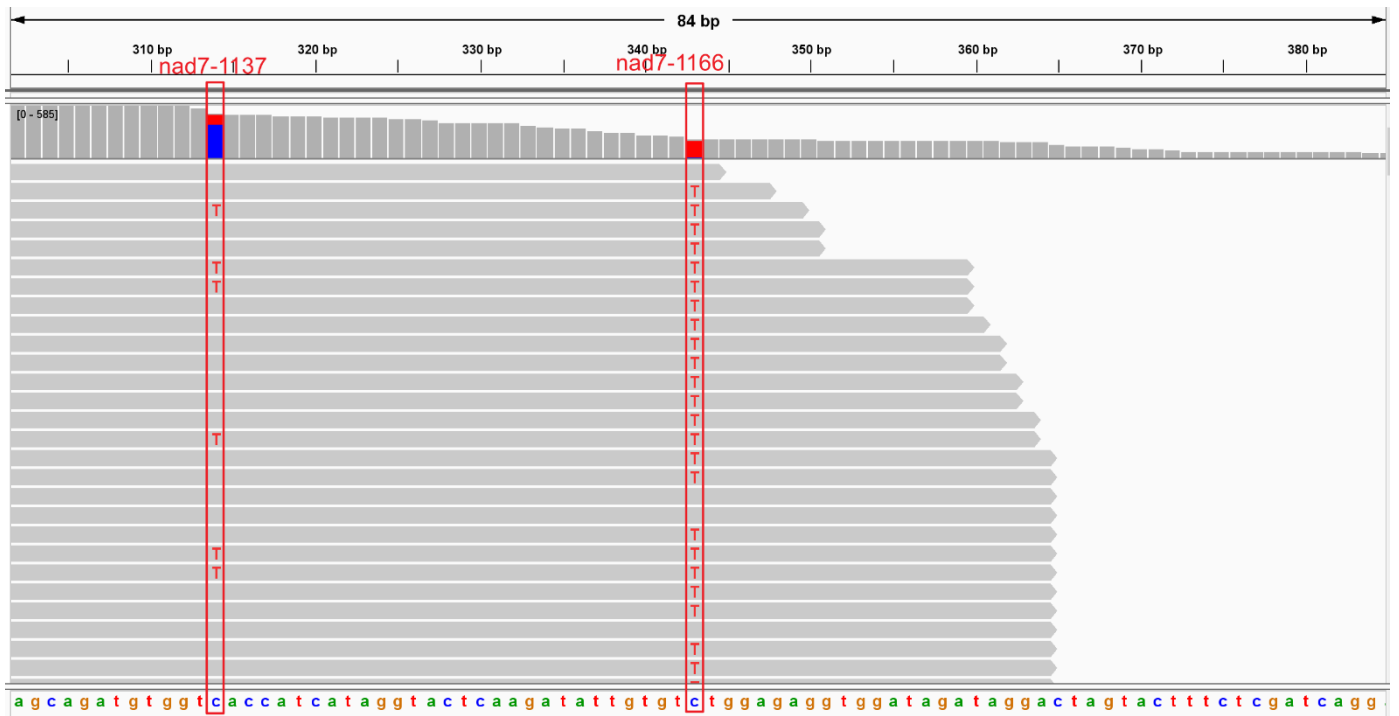

w alignment of RNA-seq reads to the coding sequence of *nad9*. 9 RNA-seq editing sites: *nad9*-15, 92, 113, 167, 298, 328, 368, 398, 439 were highlighted in red squares.

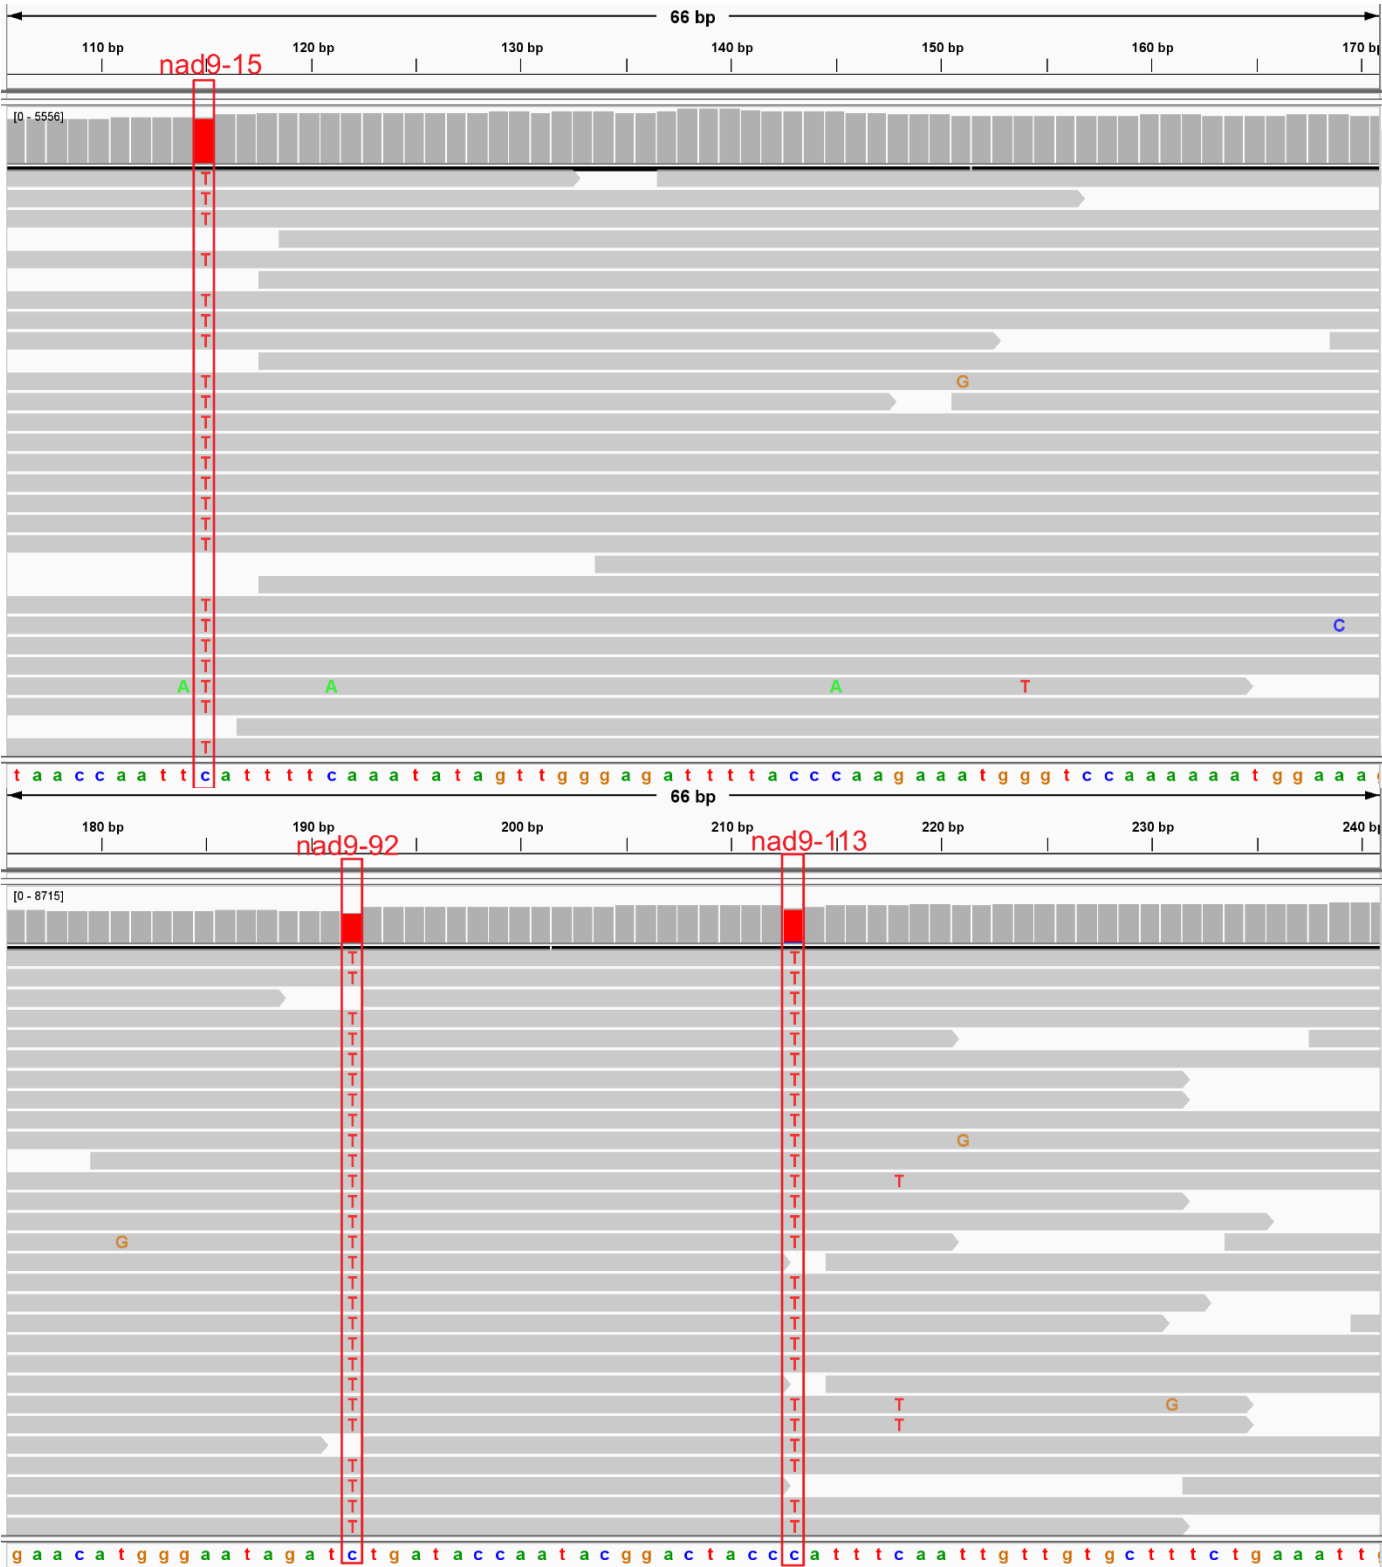

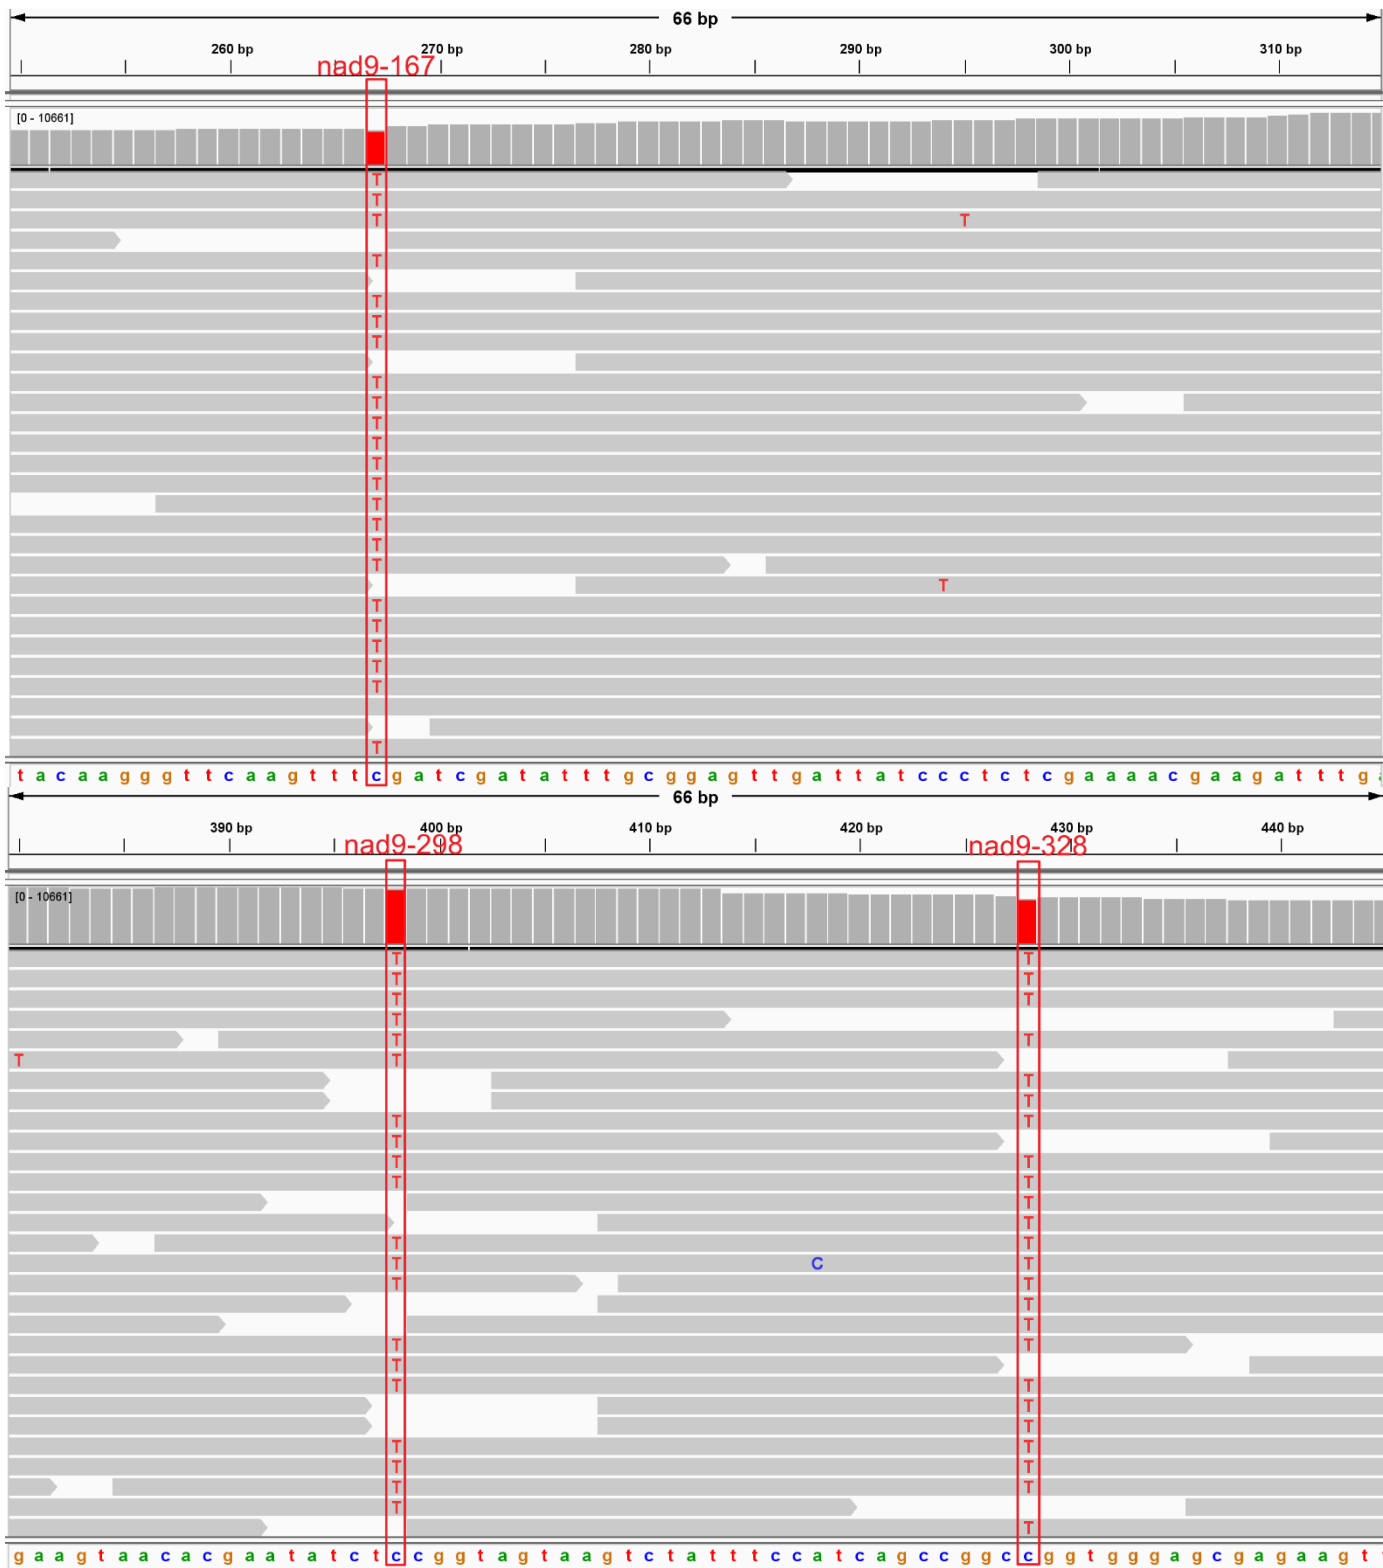

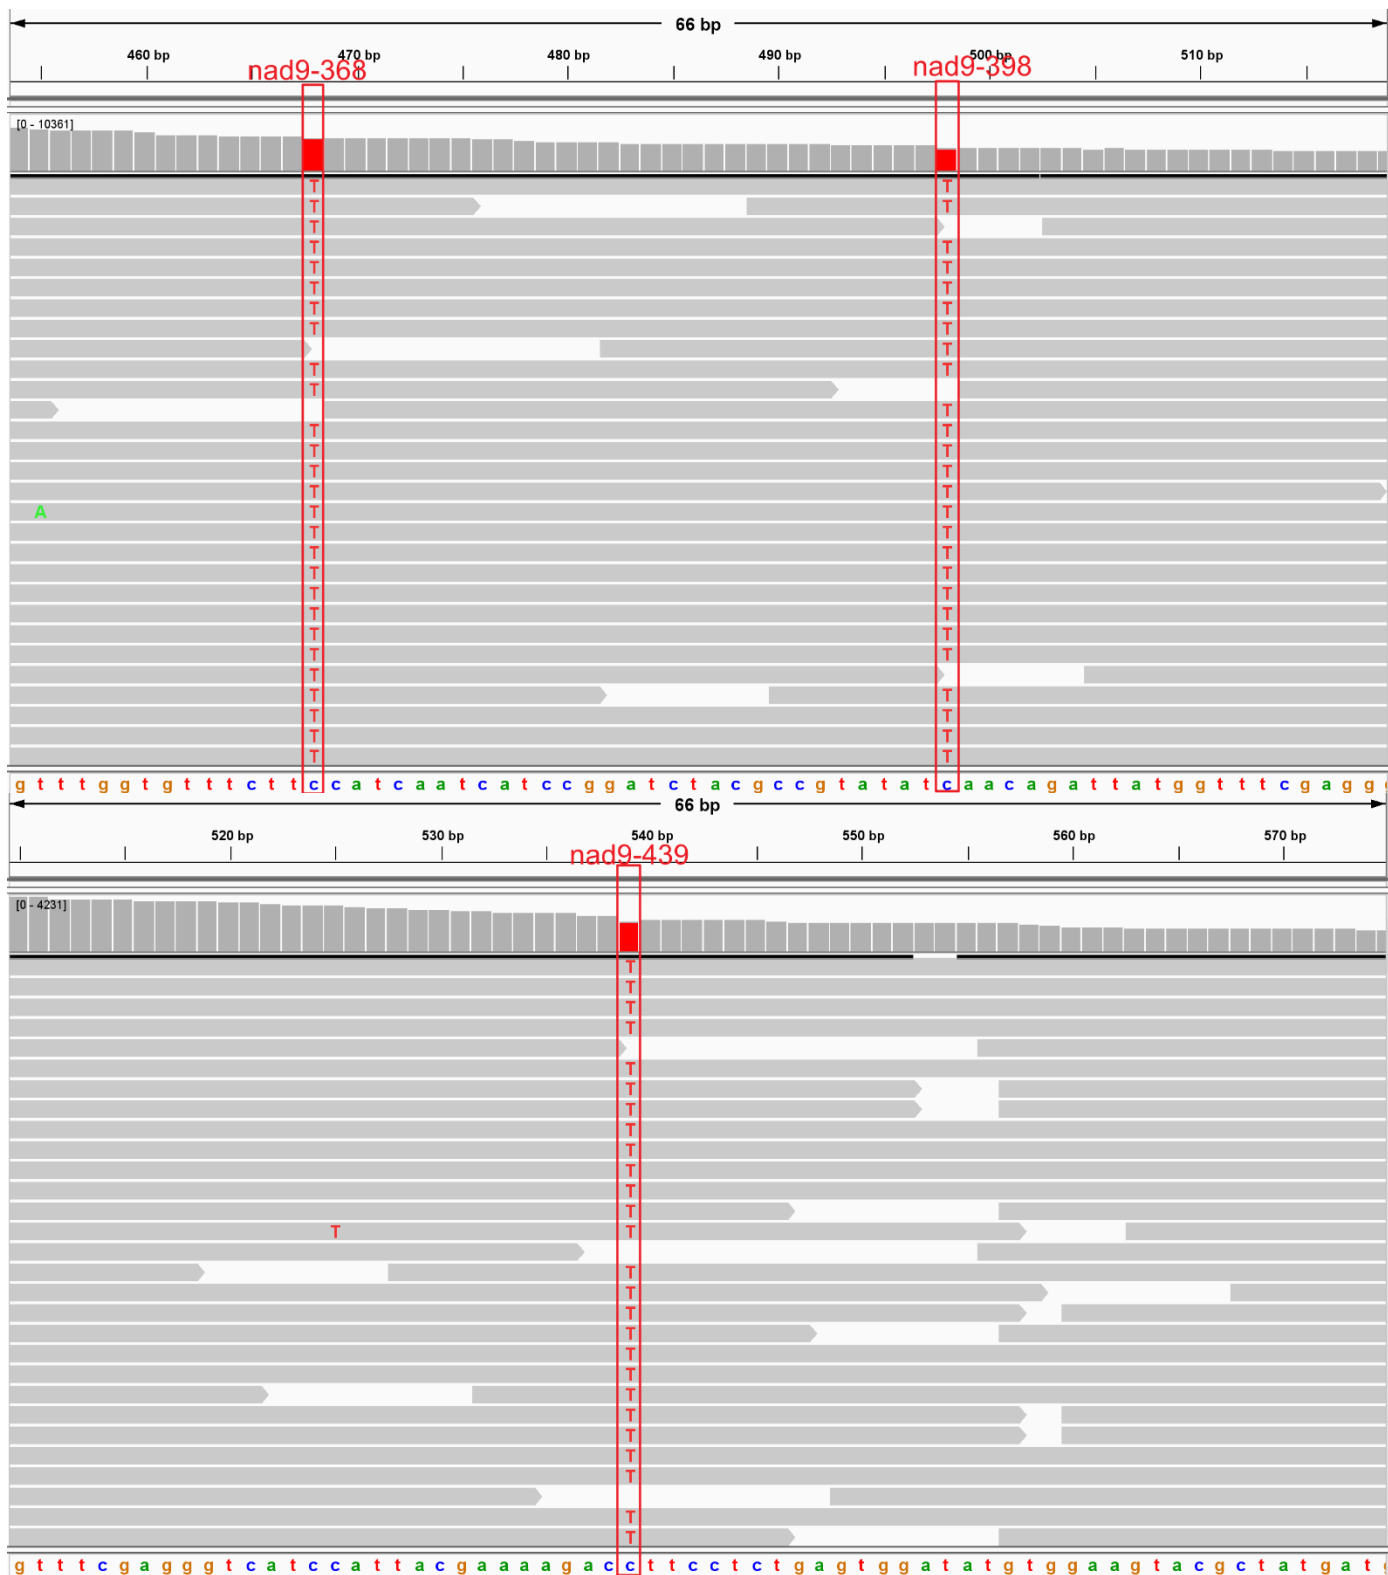

x alignment of RNA-seq reads to the coding sequence of *rp15*. 11 RNA-seq editing sites: *rp15*-8, 35, 47, 64, 160, 161, 441, 509, 512, 529, 666 were highlighted in red squares.

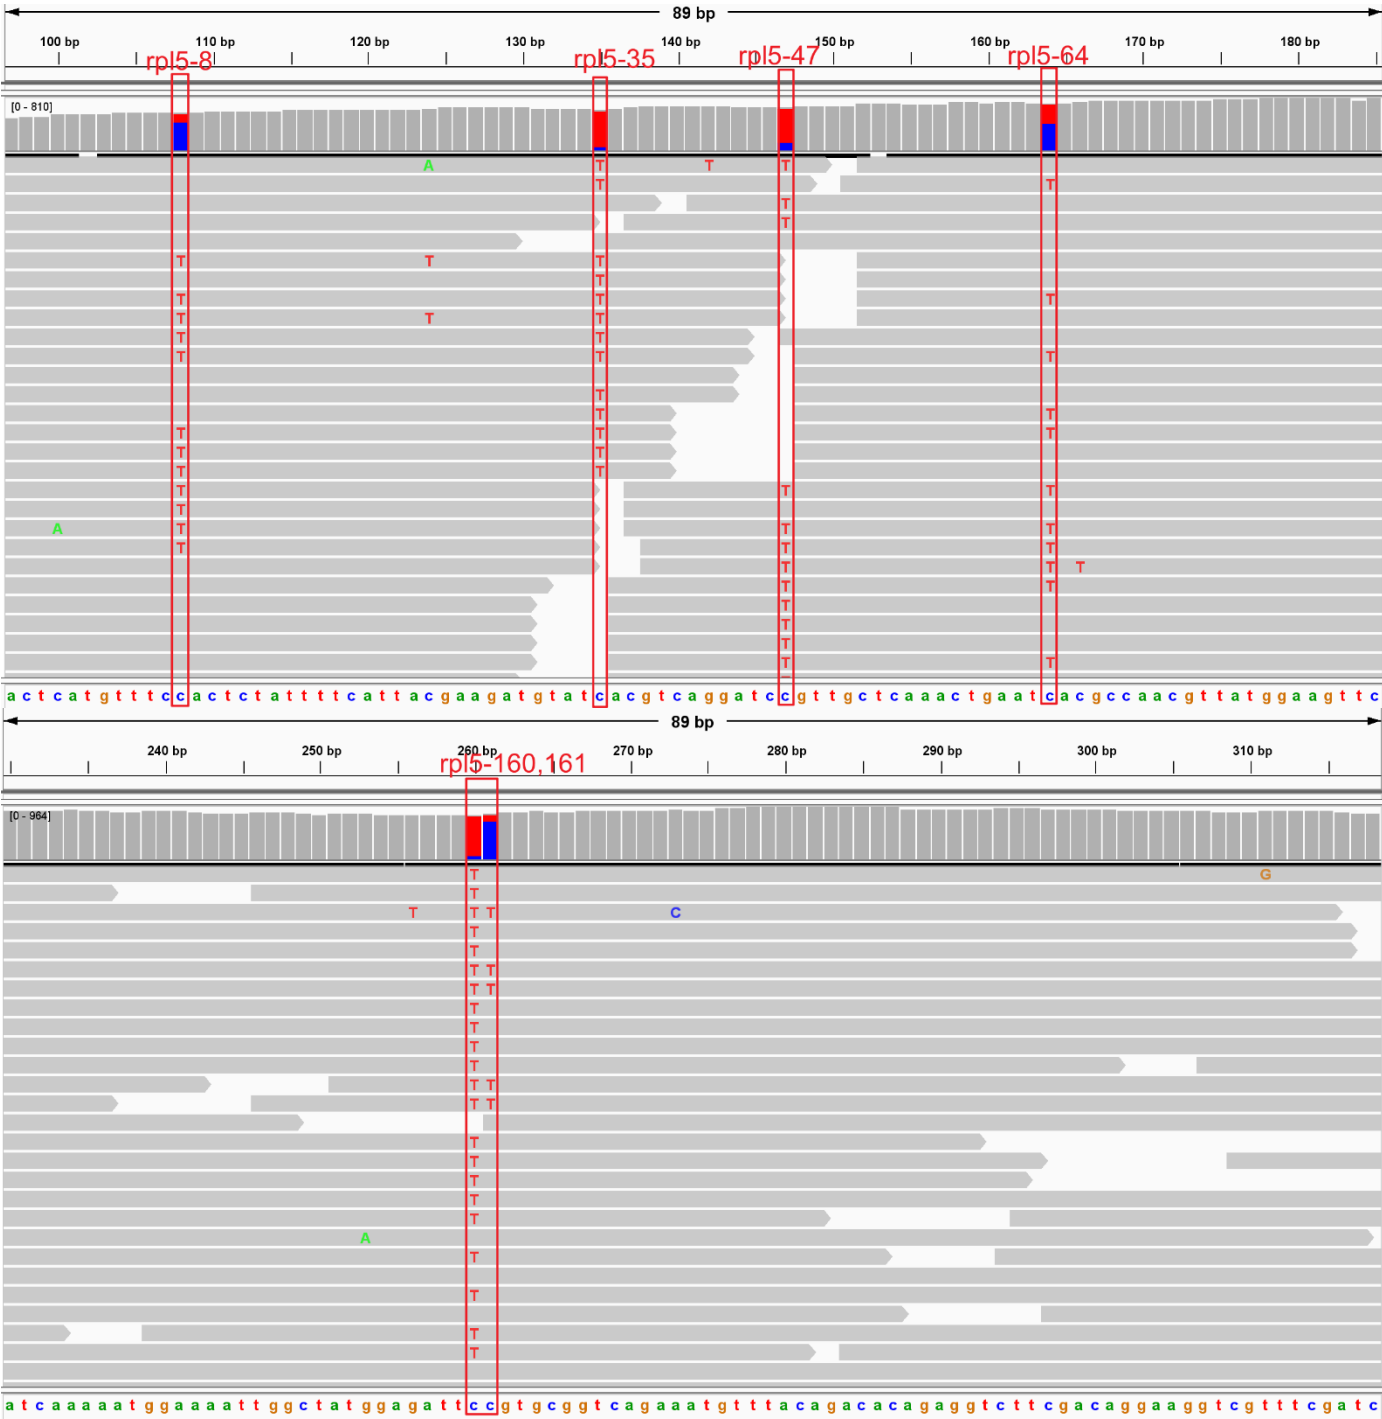



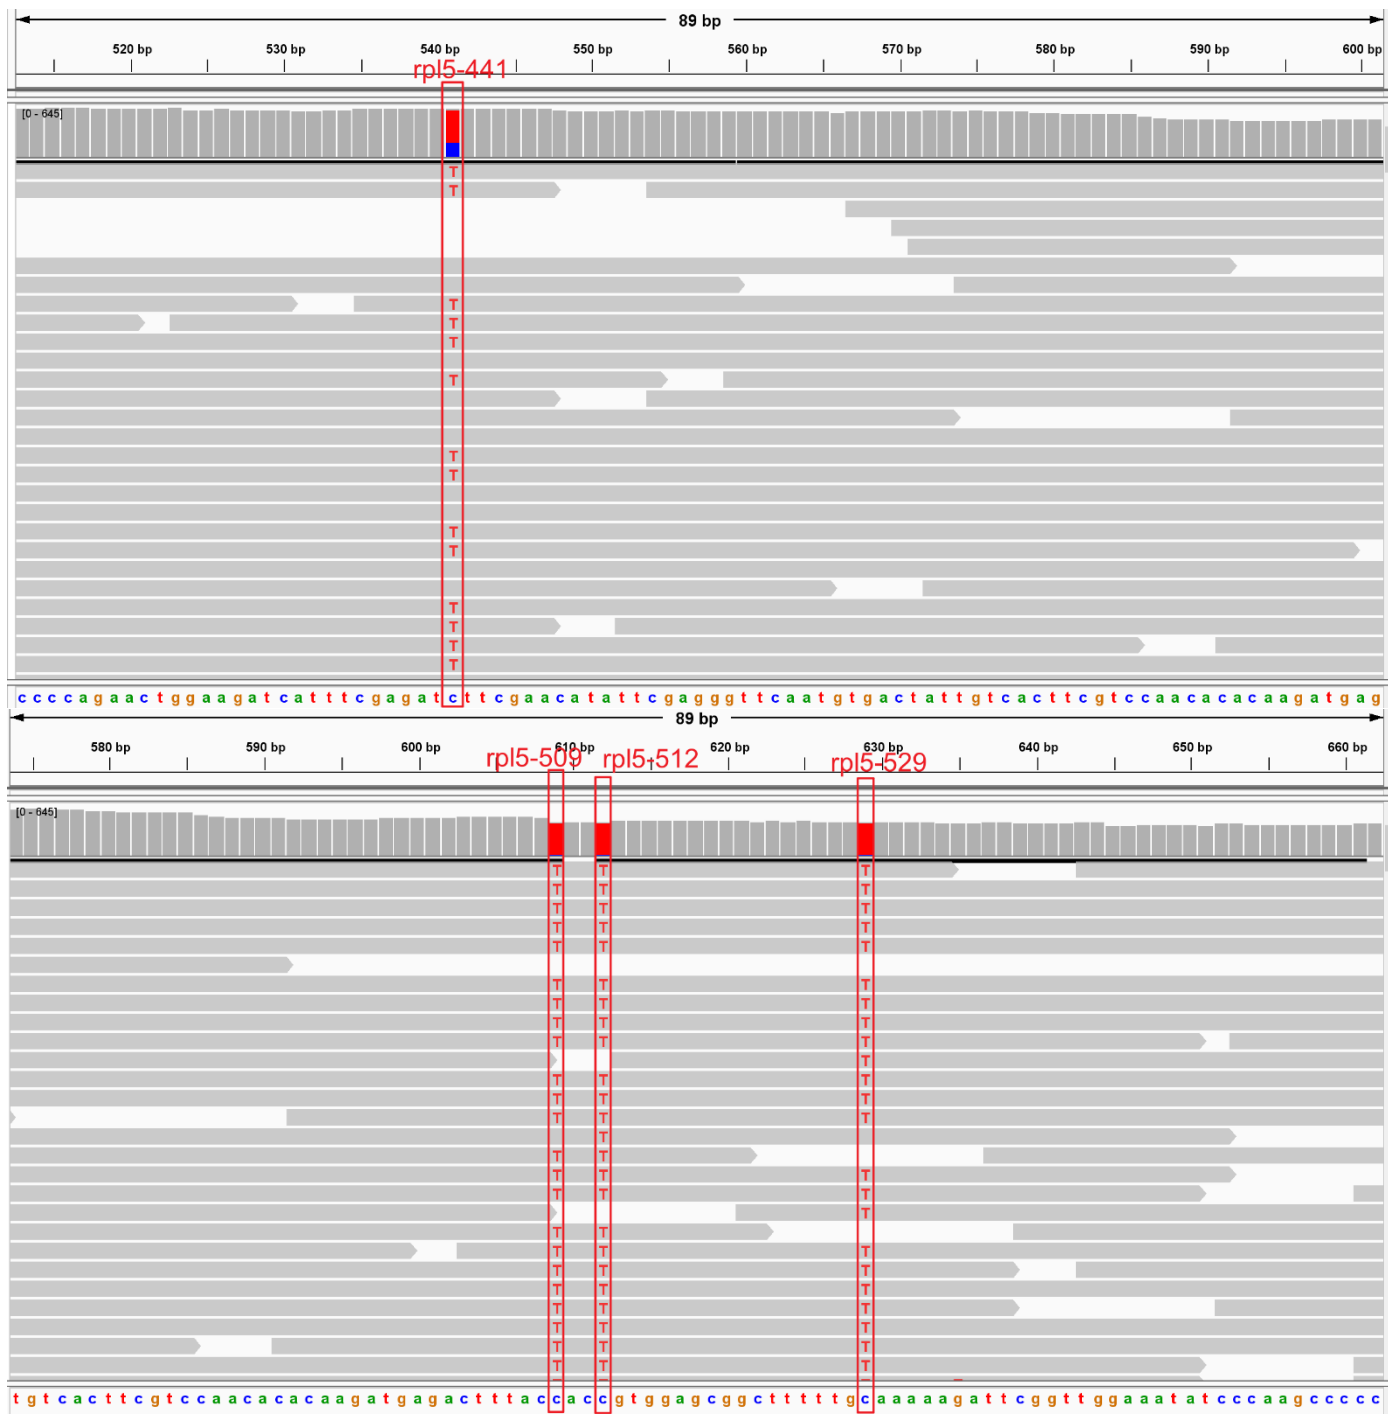

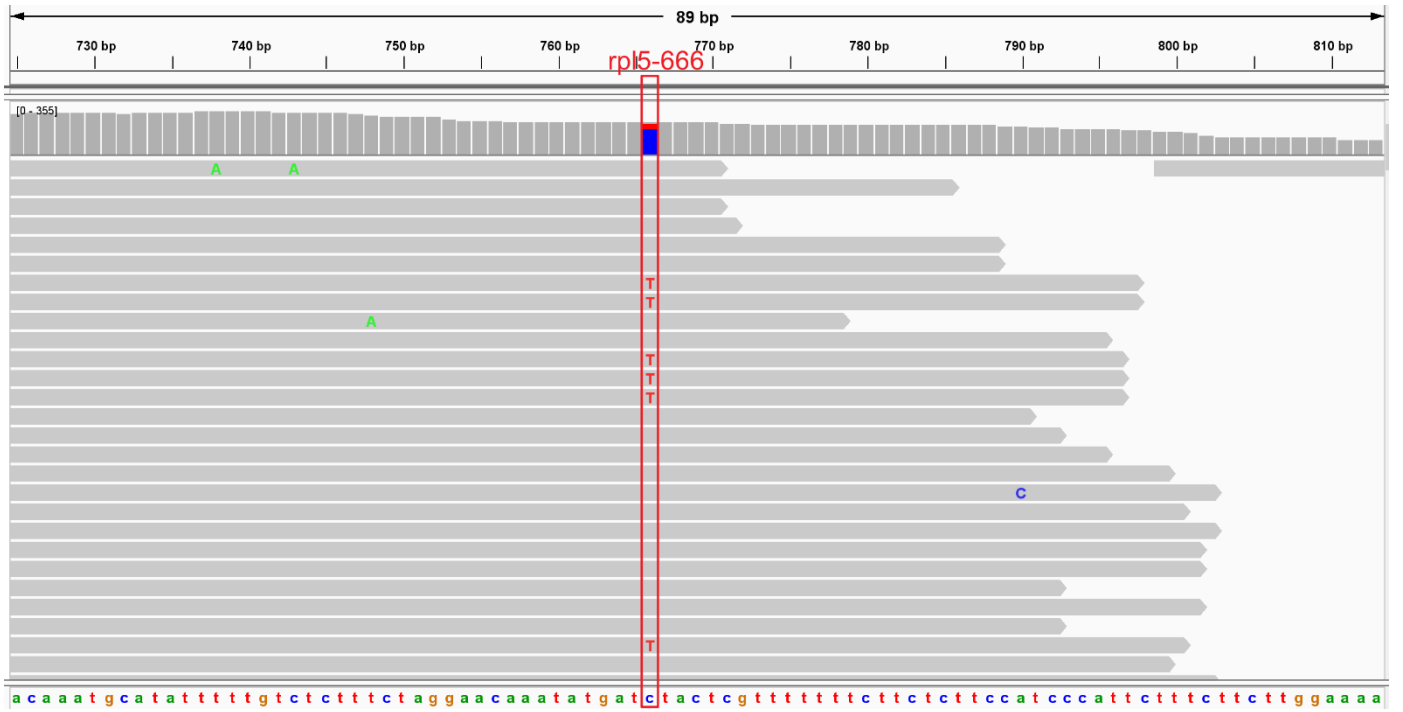

y alignment of RNA-seq reads to the coding sequence of *rpl10*. Two RNA-seq editing sites: *rpl10*-101 and 134 were highlighted in red squares.

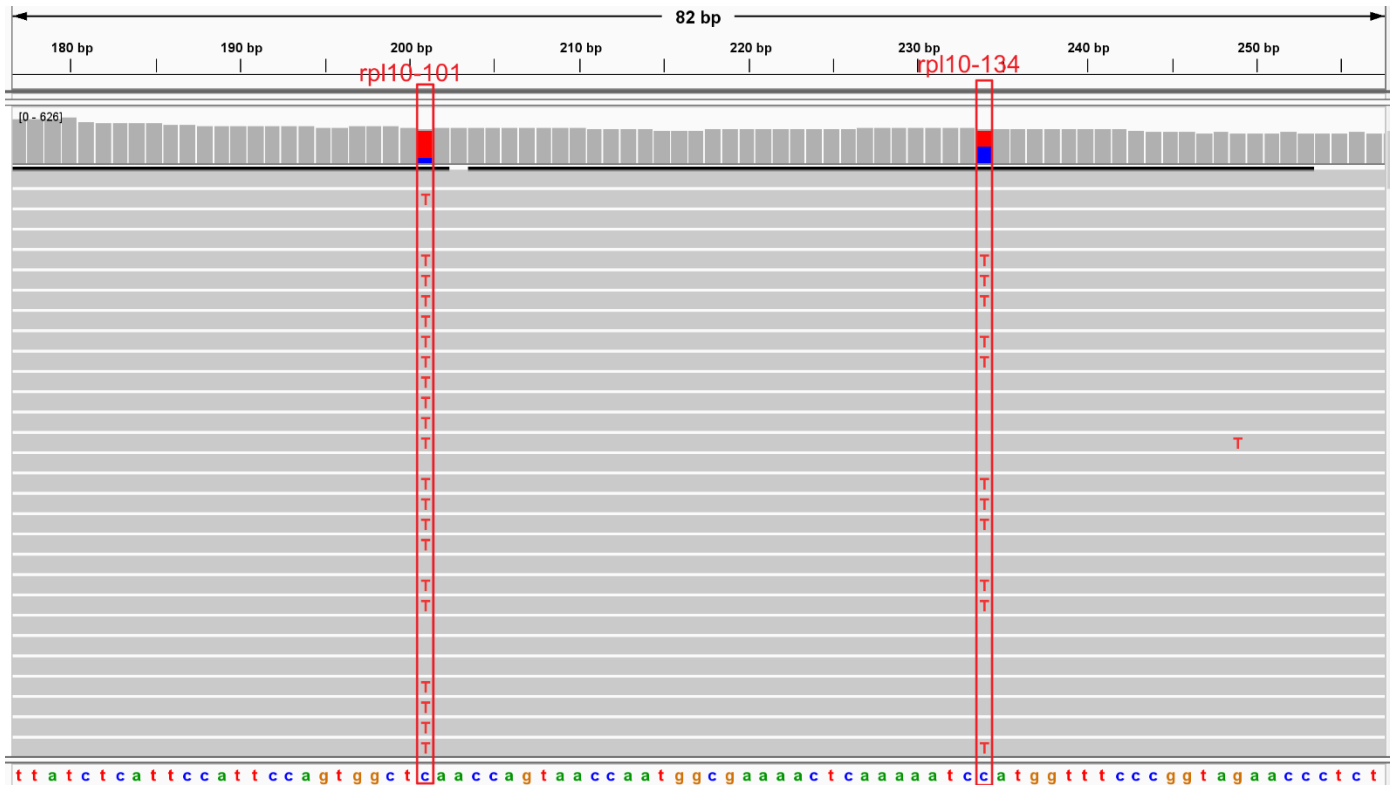

z alignment of RNA-seq reads to the coding sequence of *rp16*. One RNA-seq editing sites: *rp16*-221 was highlighted in red squares.

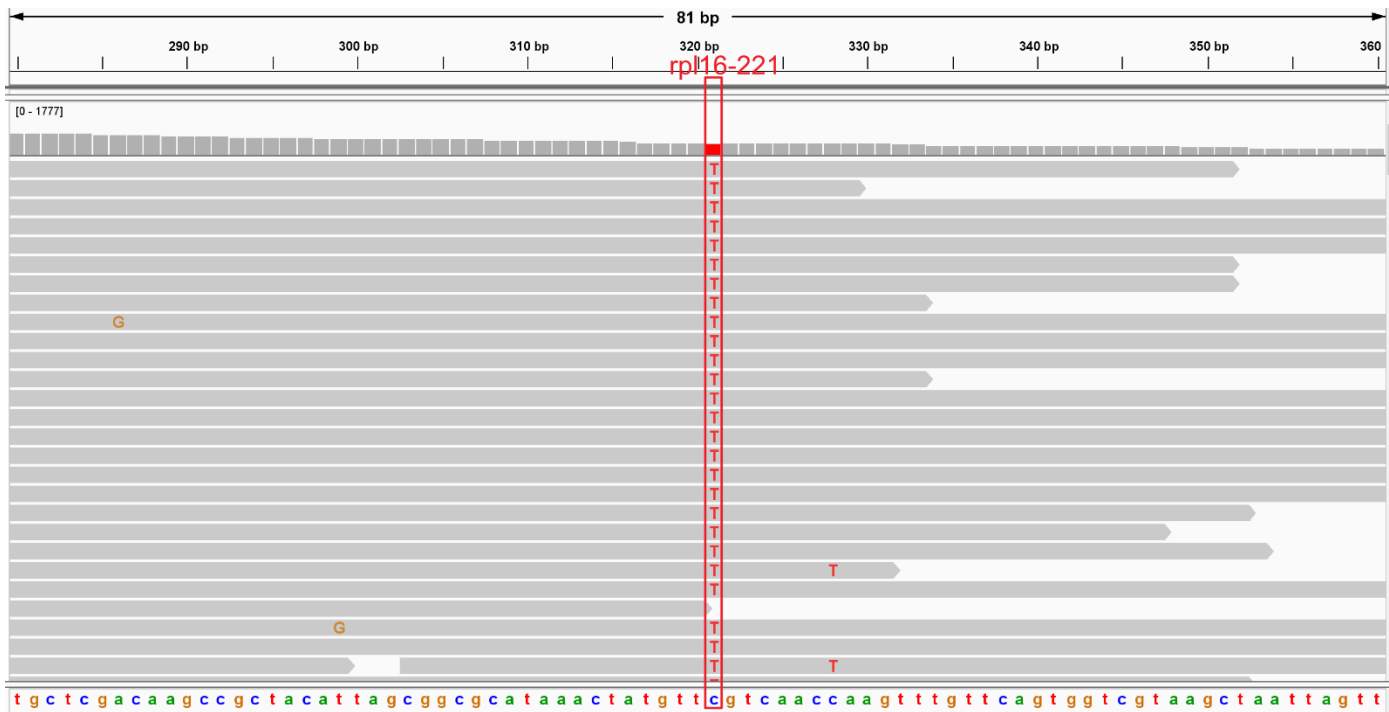

A alignment of RNA-seq reads to the coding sequence of *rps3*. Eight RNA-seq editing sites: *rps3*-92, 512, 713, 986, 1022, 1355, 1496, and 1582 were highlighted in red squares.

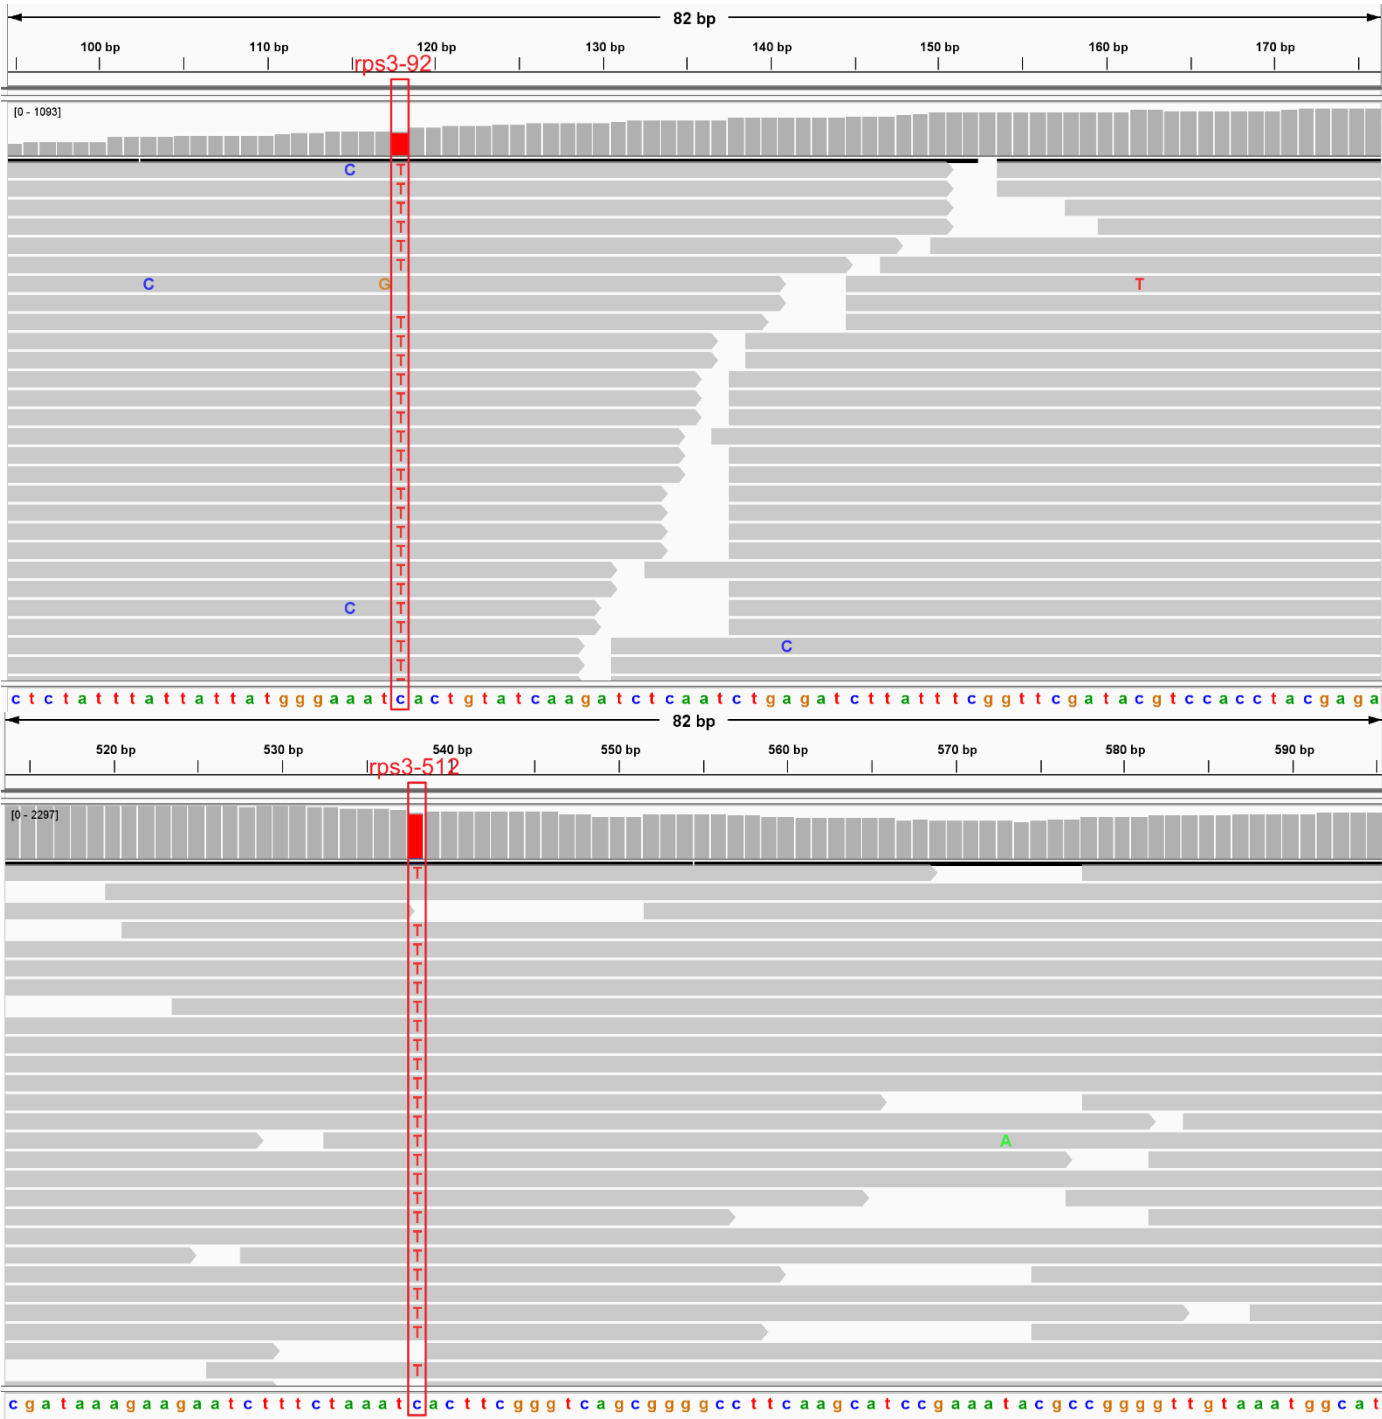

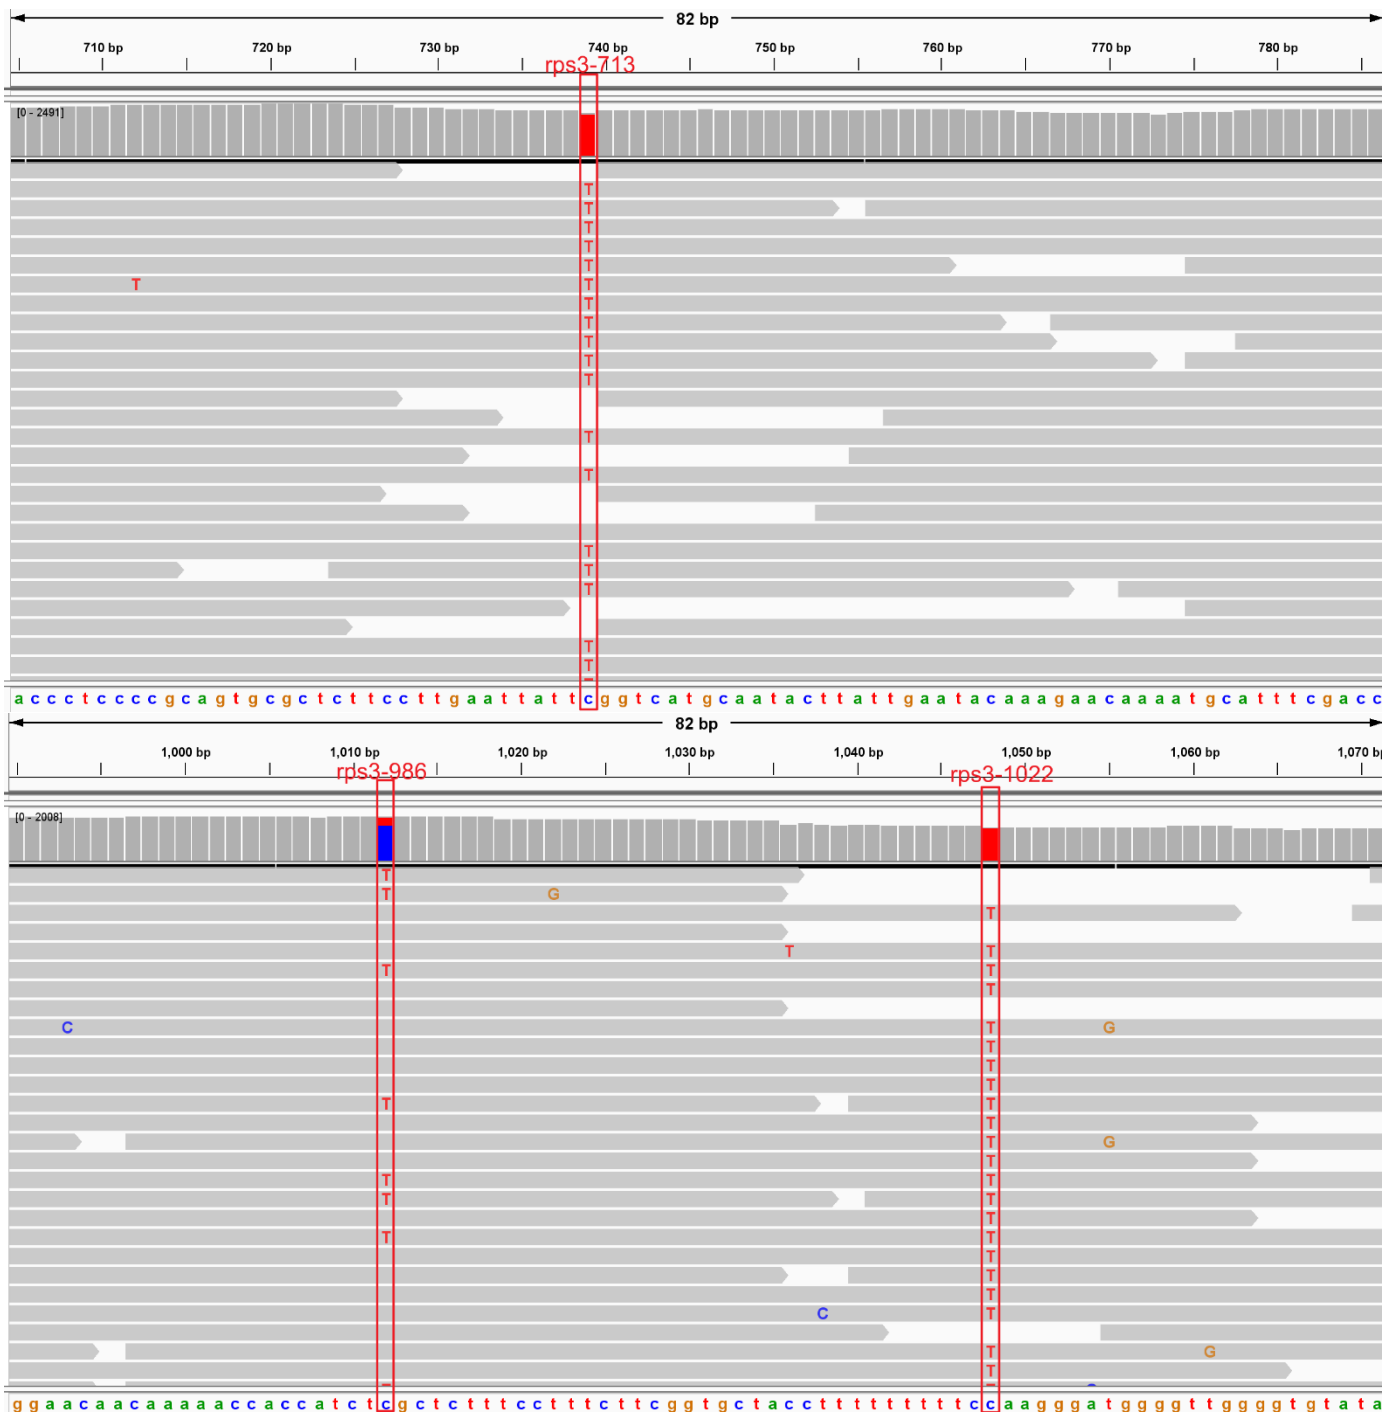

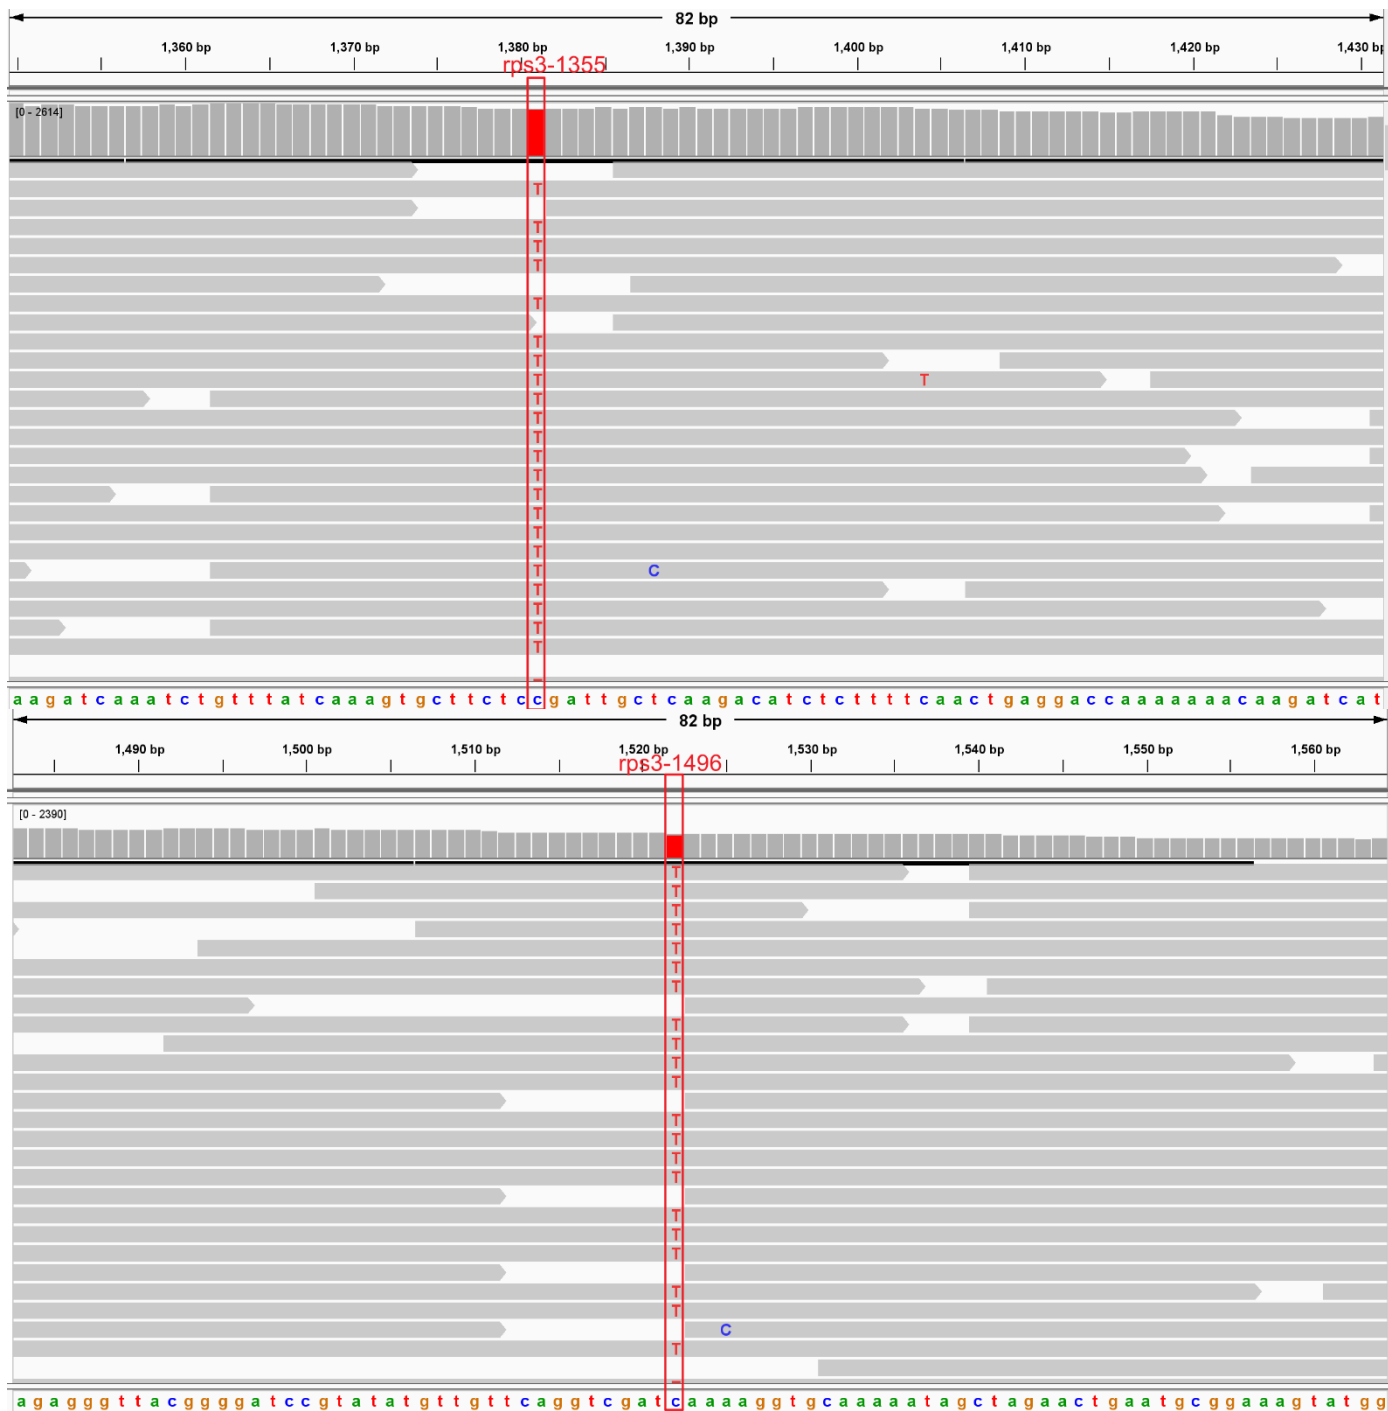

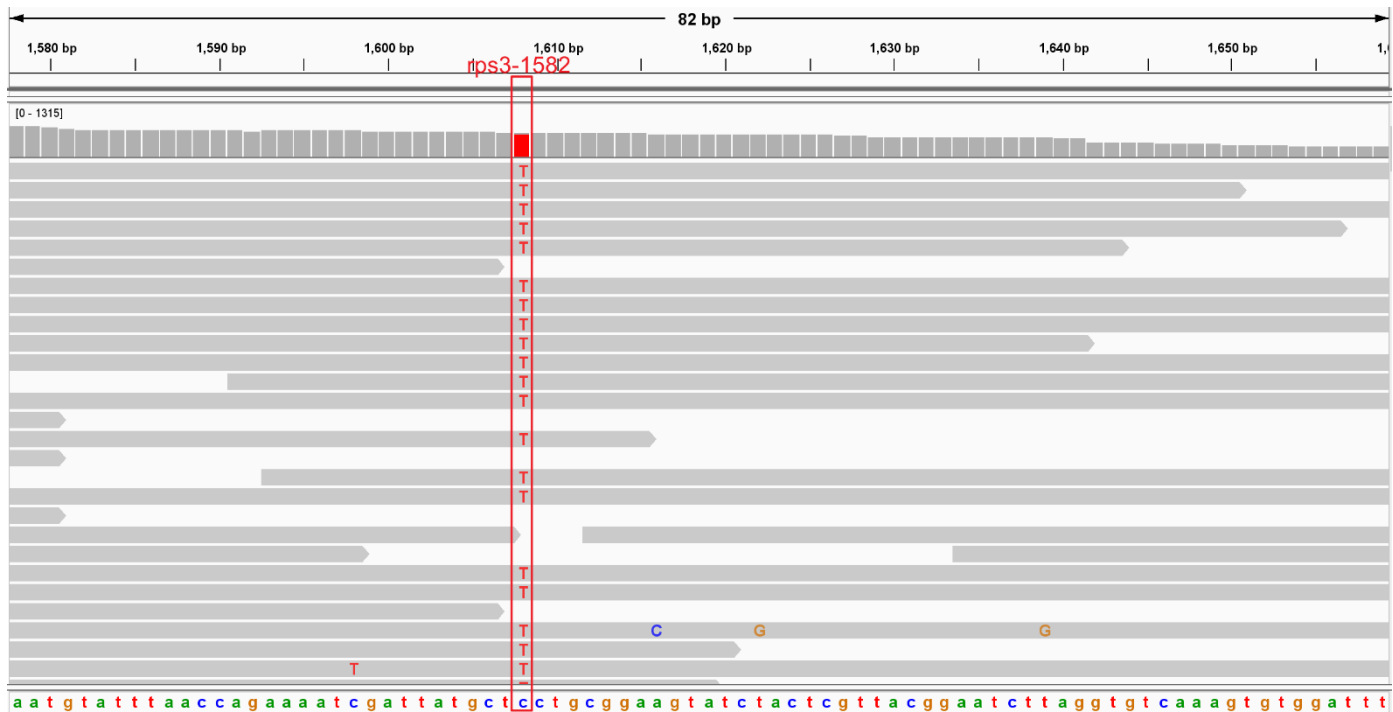



B alignment of RNA-seq reads to the coding sequence of *rps4*. 20 RNA-seq editing sites: *rps4*-176, 205, 219, 275, 287, 299, 316, 344, 443, 483, 491, 592, 848, 852, 941, 952, 962, 977, 1028, 1042 were highlighted in red squares.

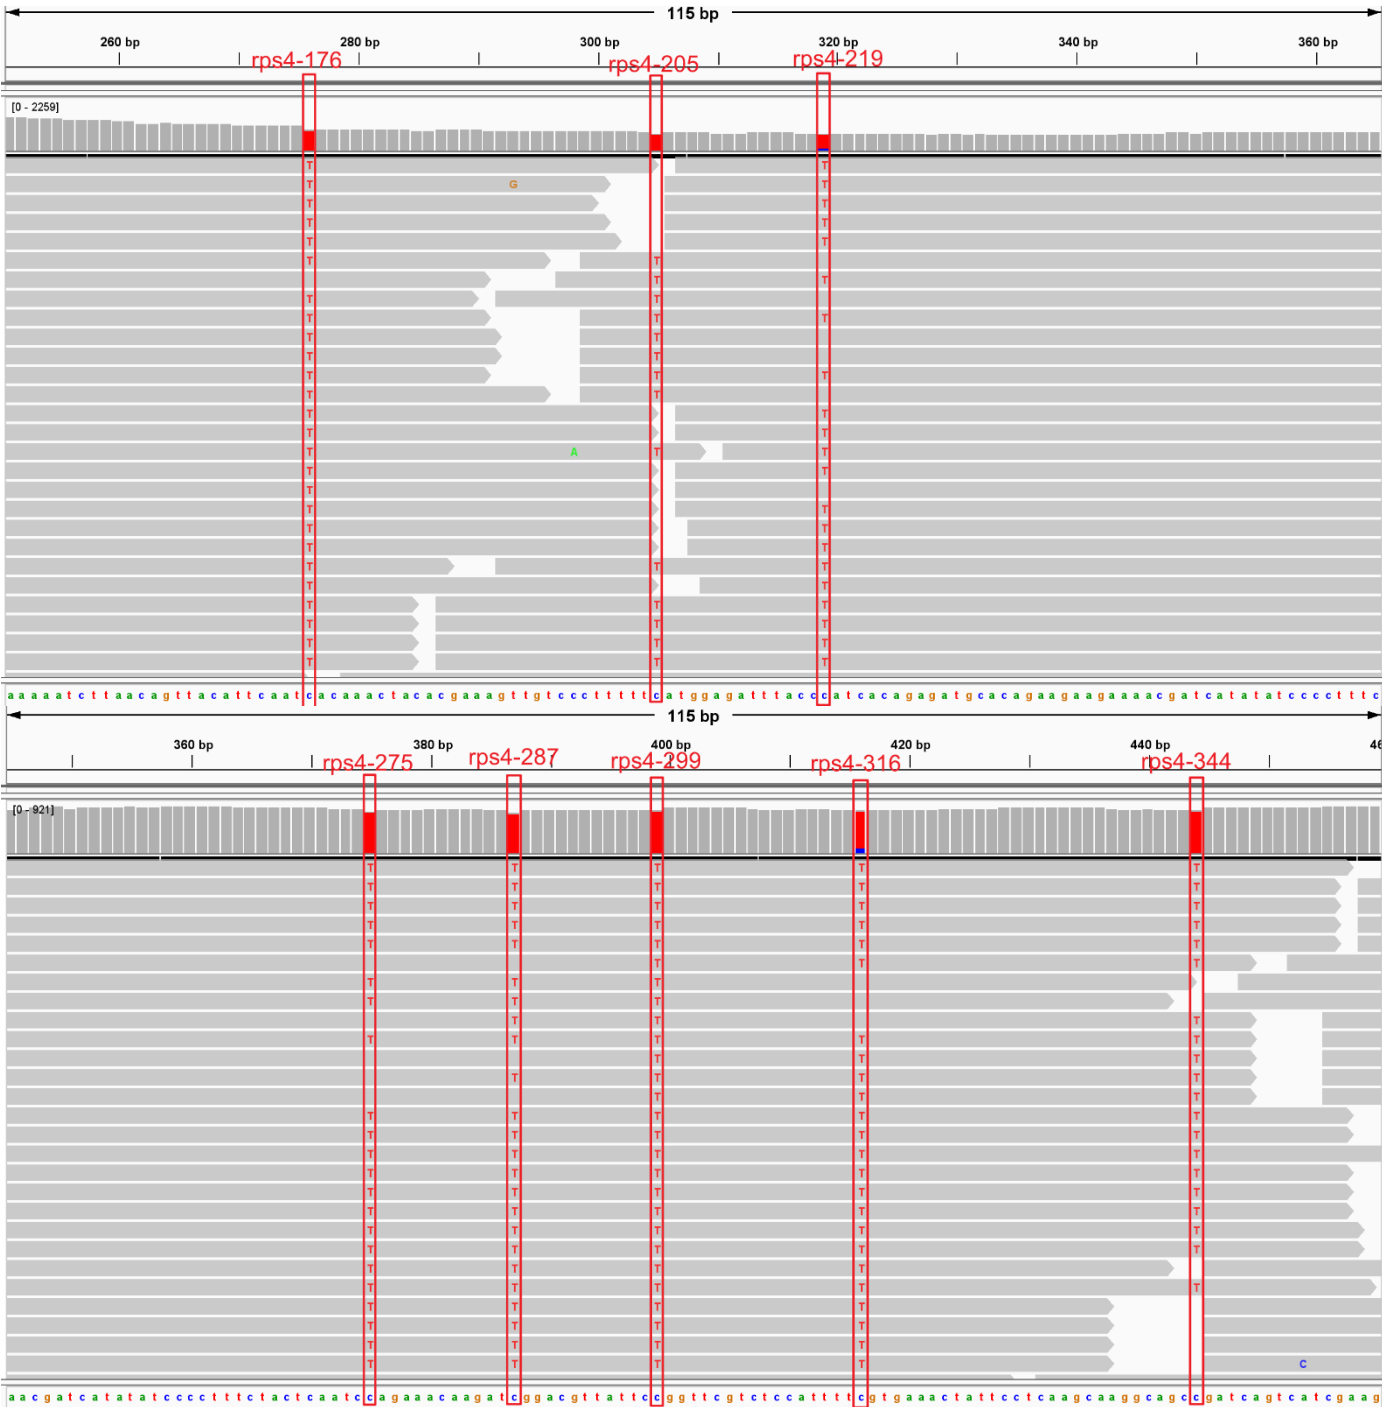

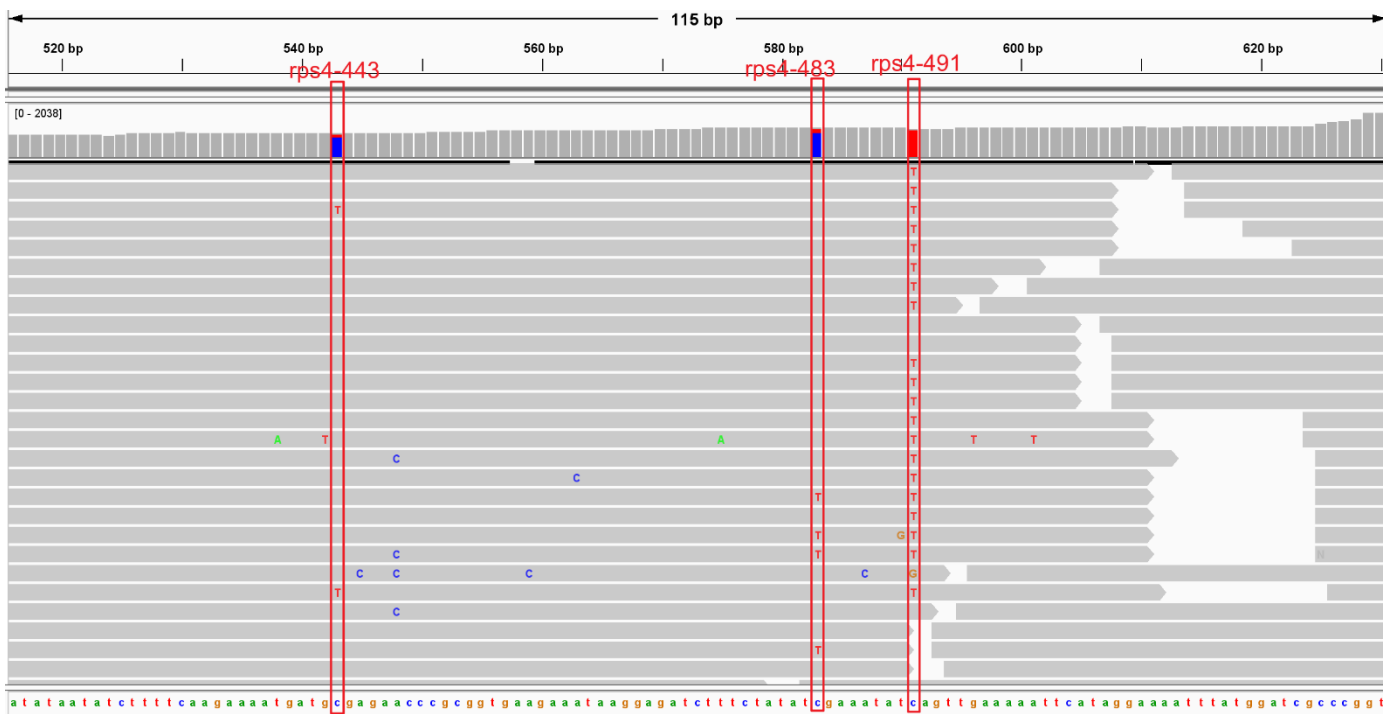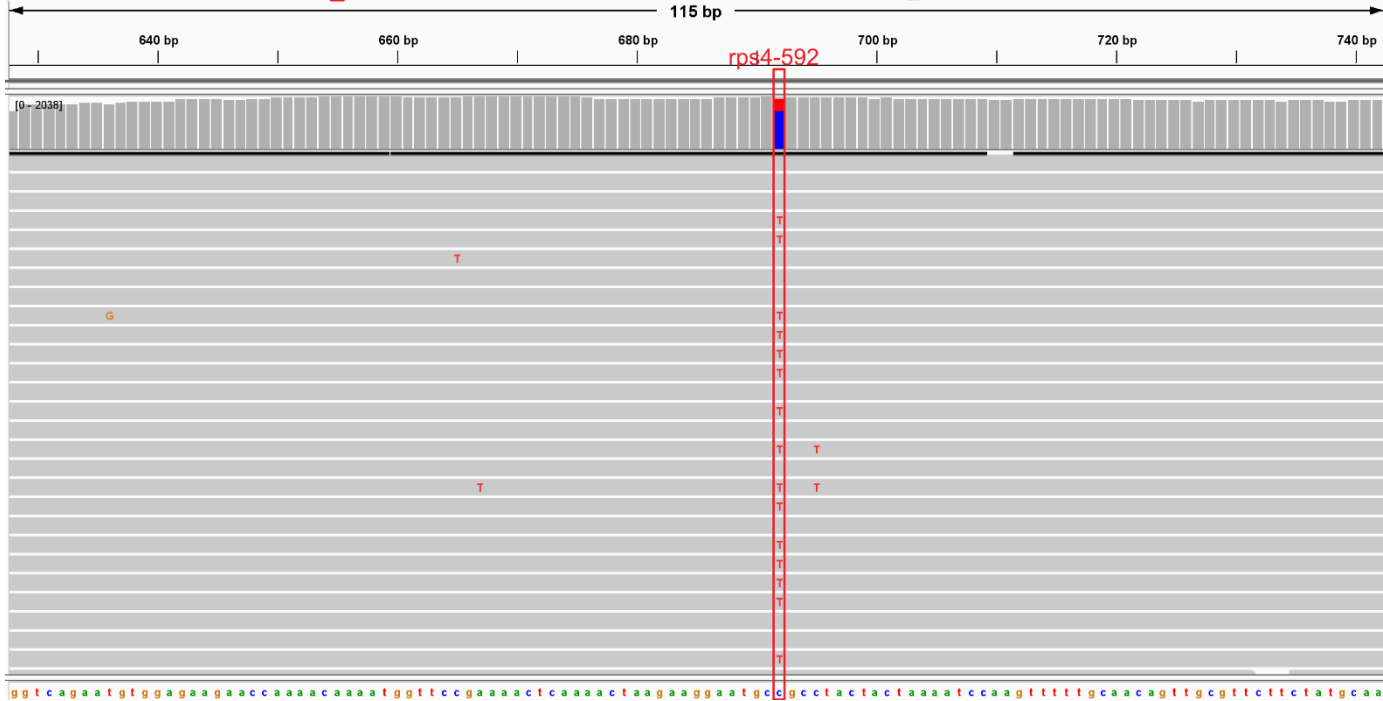

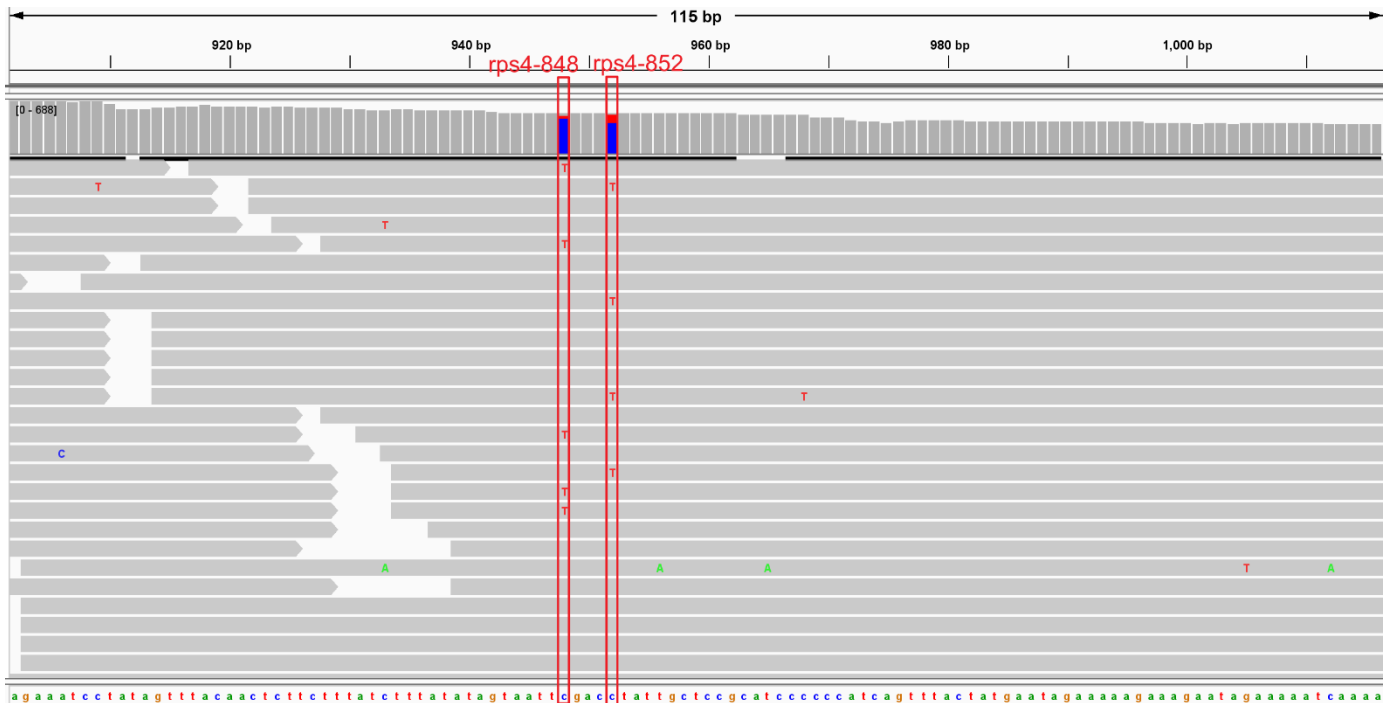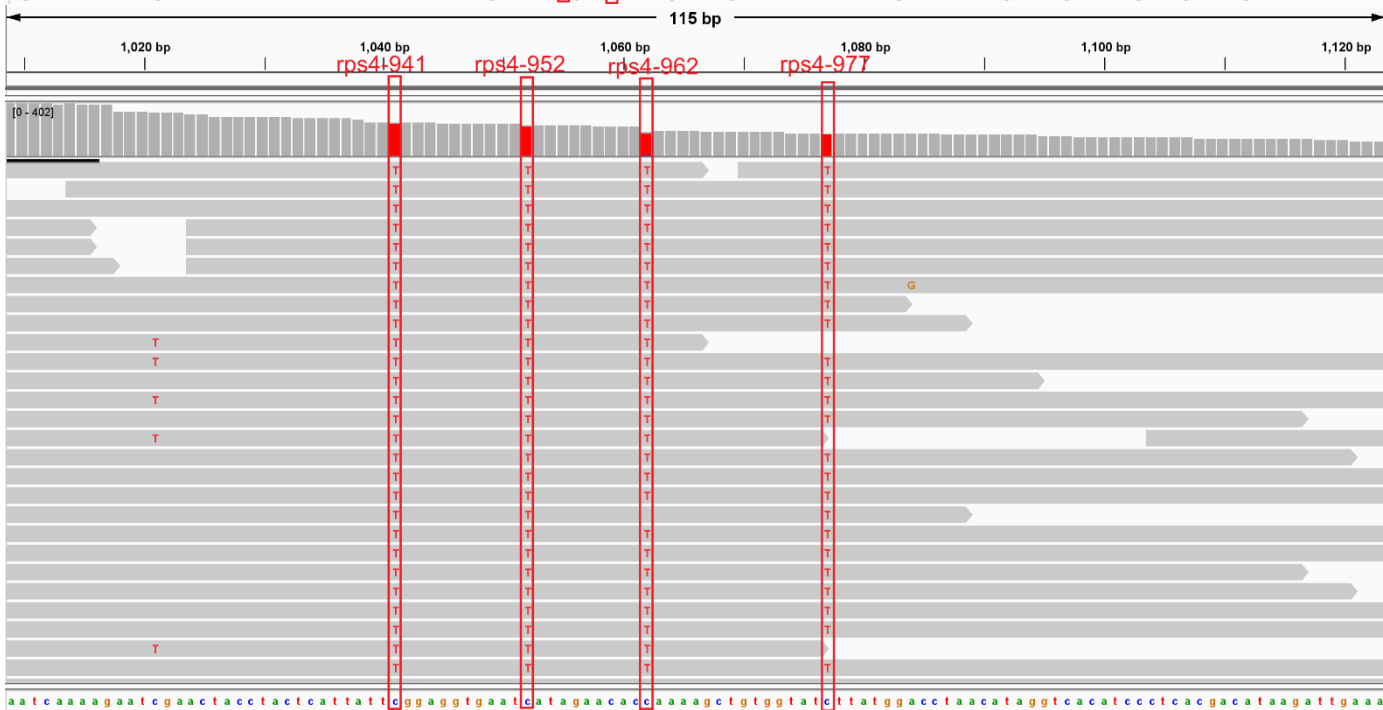

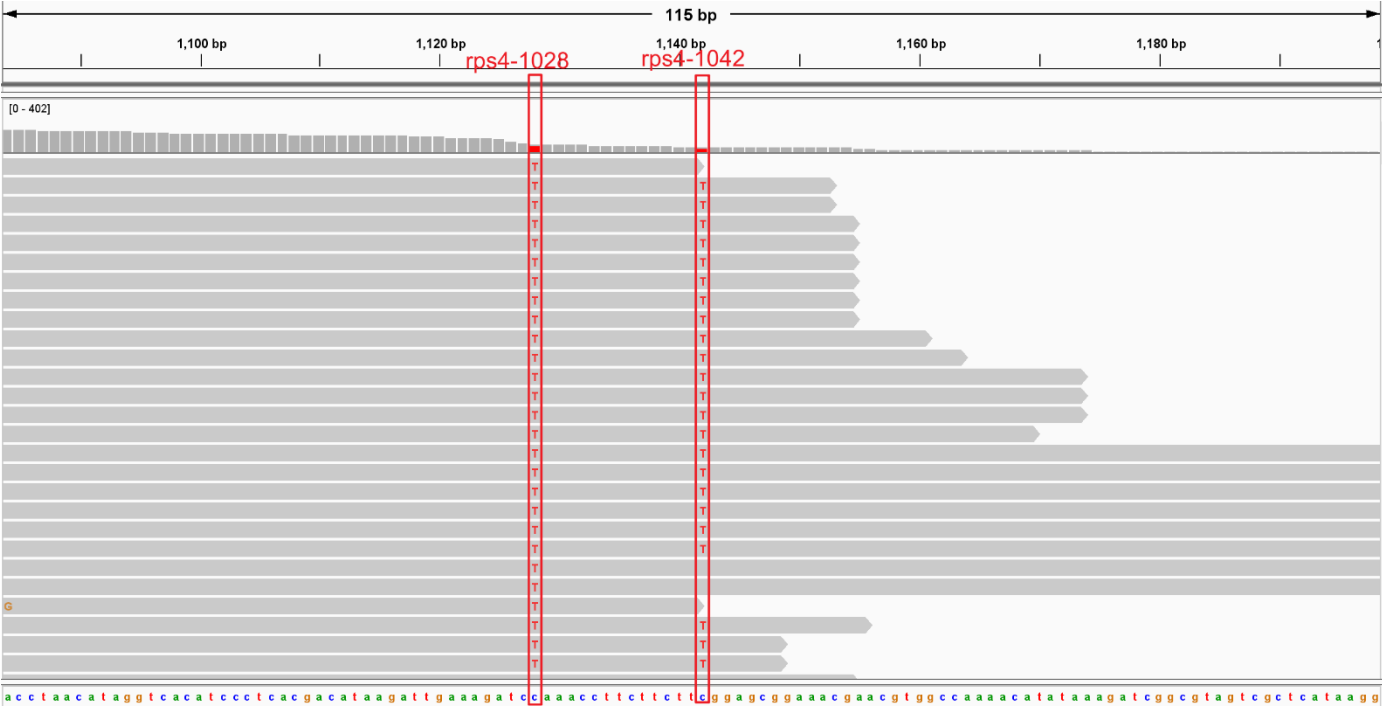

C alignment of RNA-seq reads to the coding sequence of *rps10*. Six RNA-seq editing sites: *rps10*-102, 132, 210, 214, 278, 307 were highlighted in red squares.

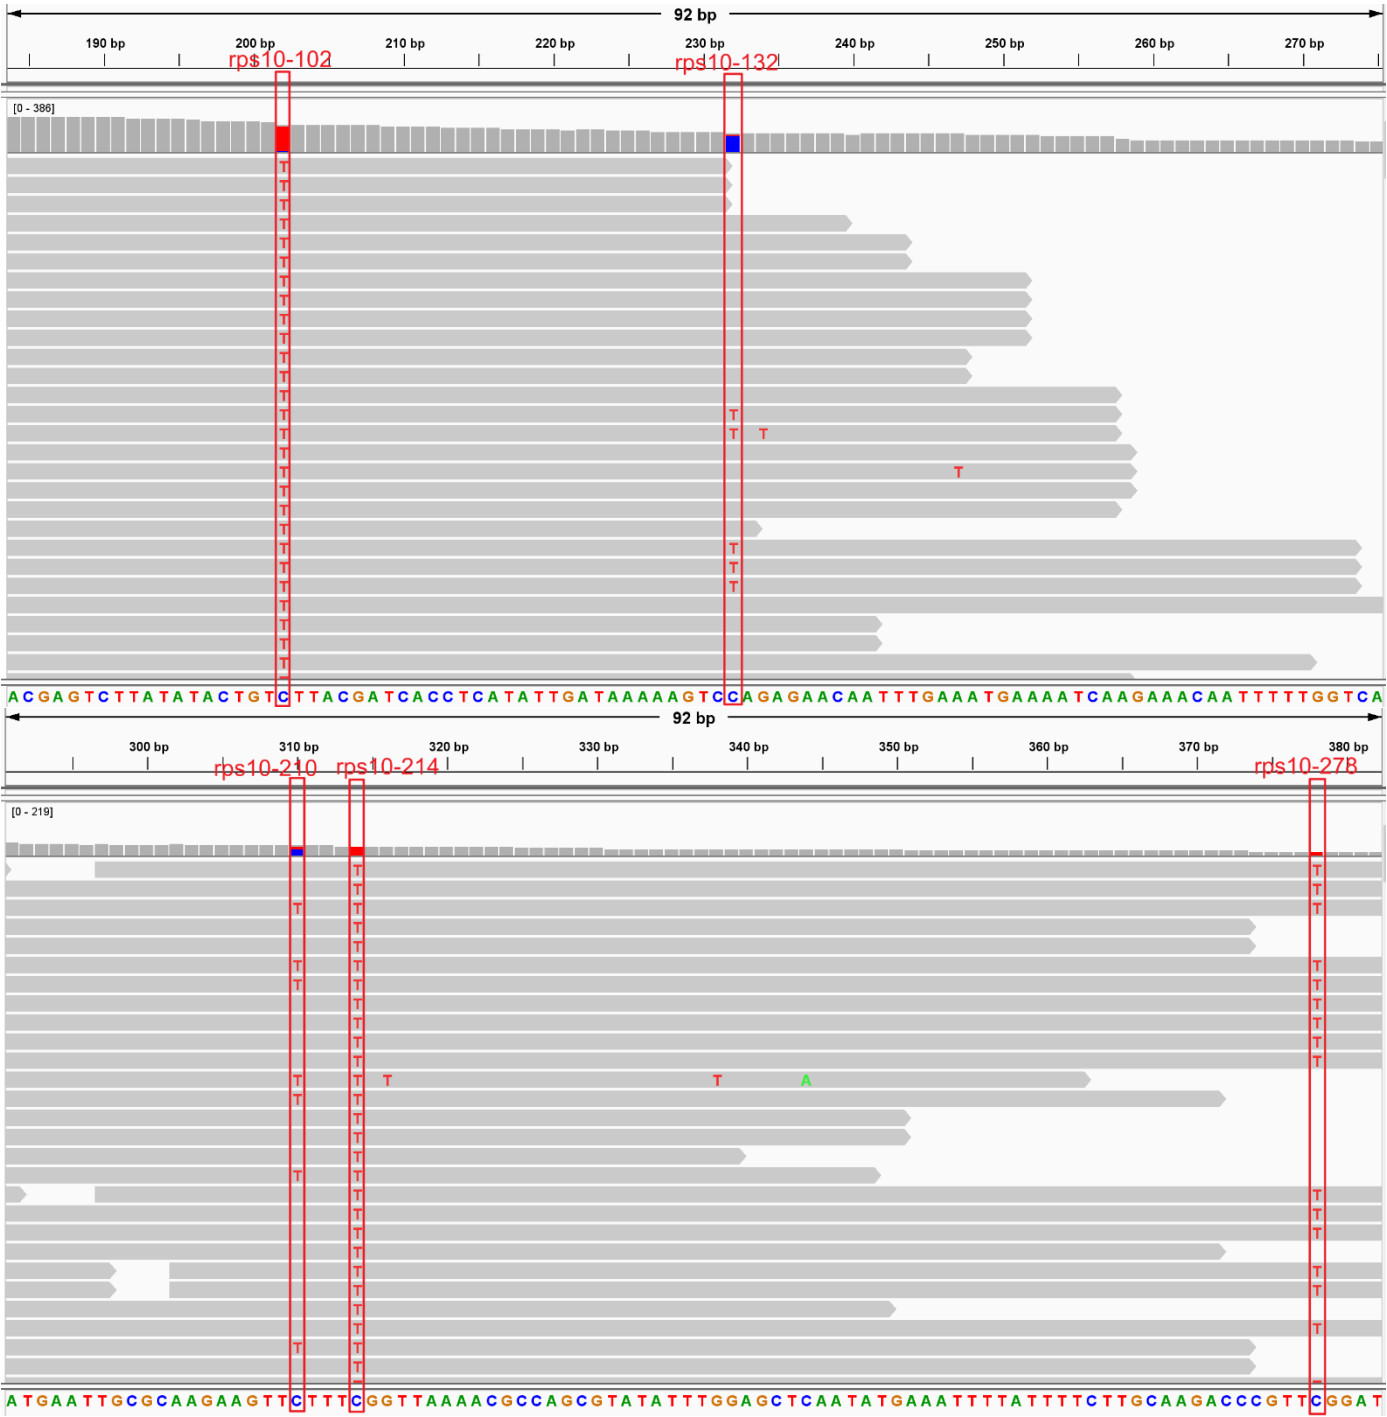

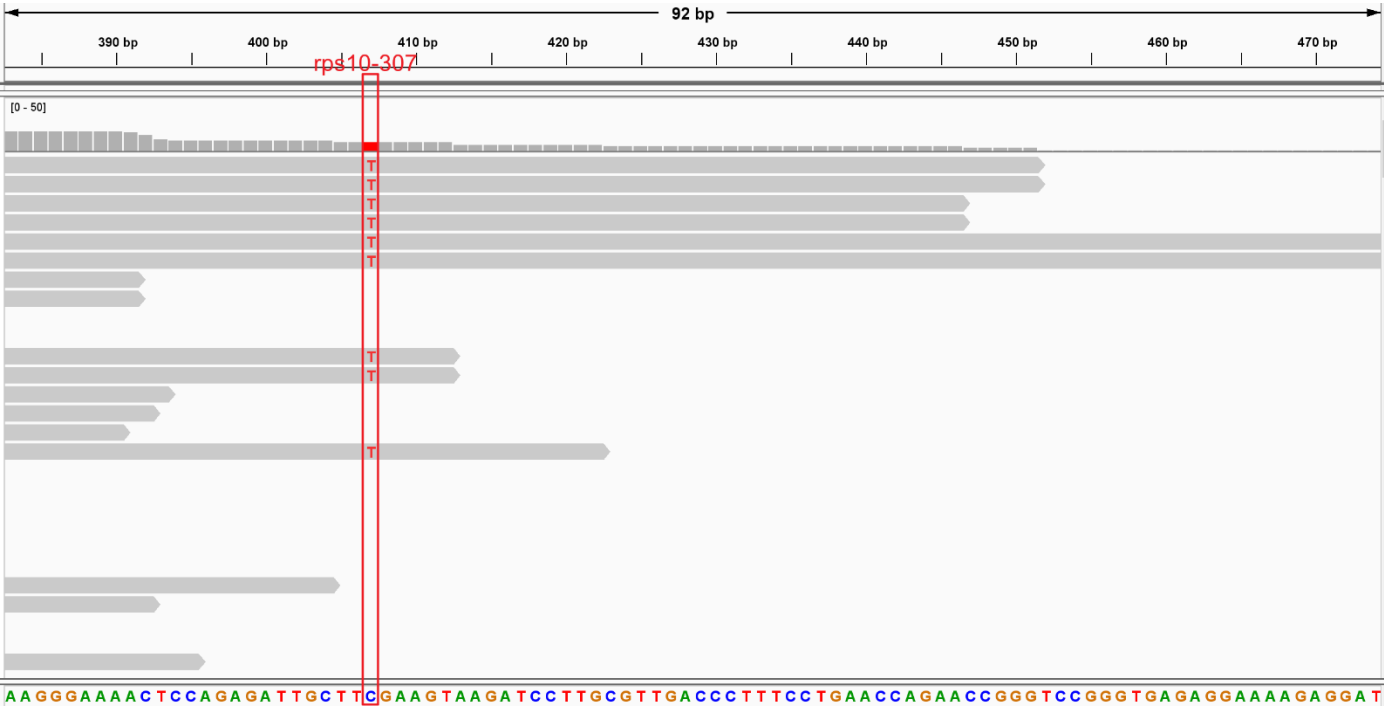

D alignment of RNA-seq reads to the coding sequence of *rps12*. Five RNA-seq editing sites: *rps12*-104, 159, 196, 221, 284 were highlighted in red squares.

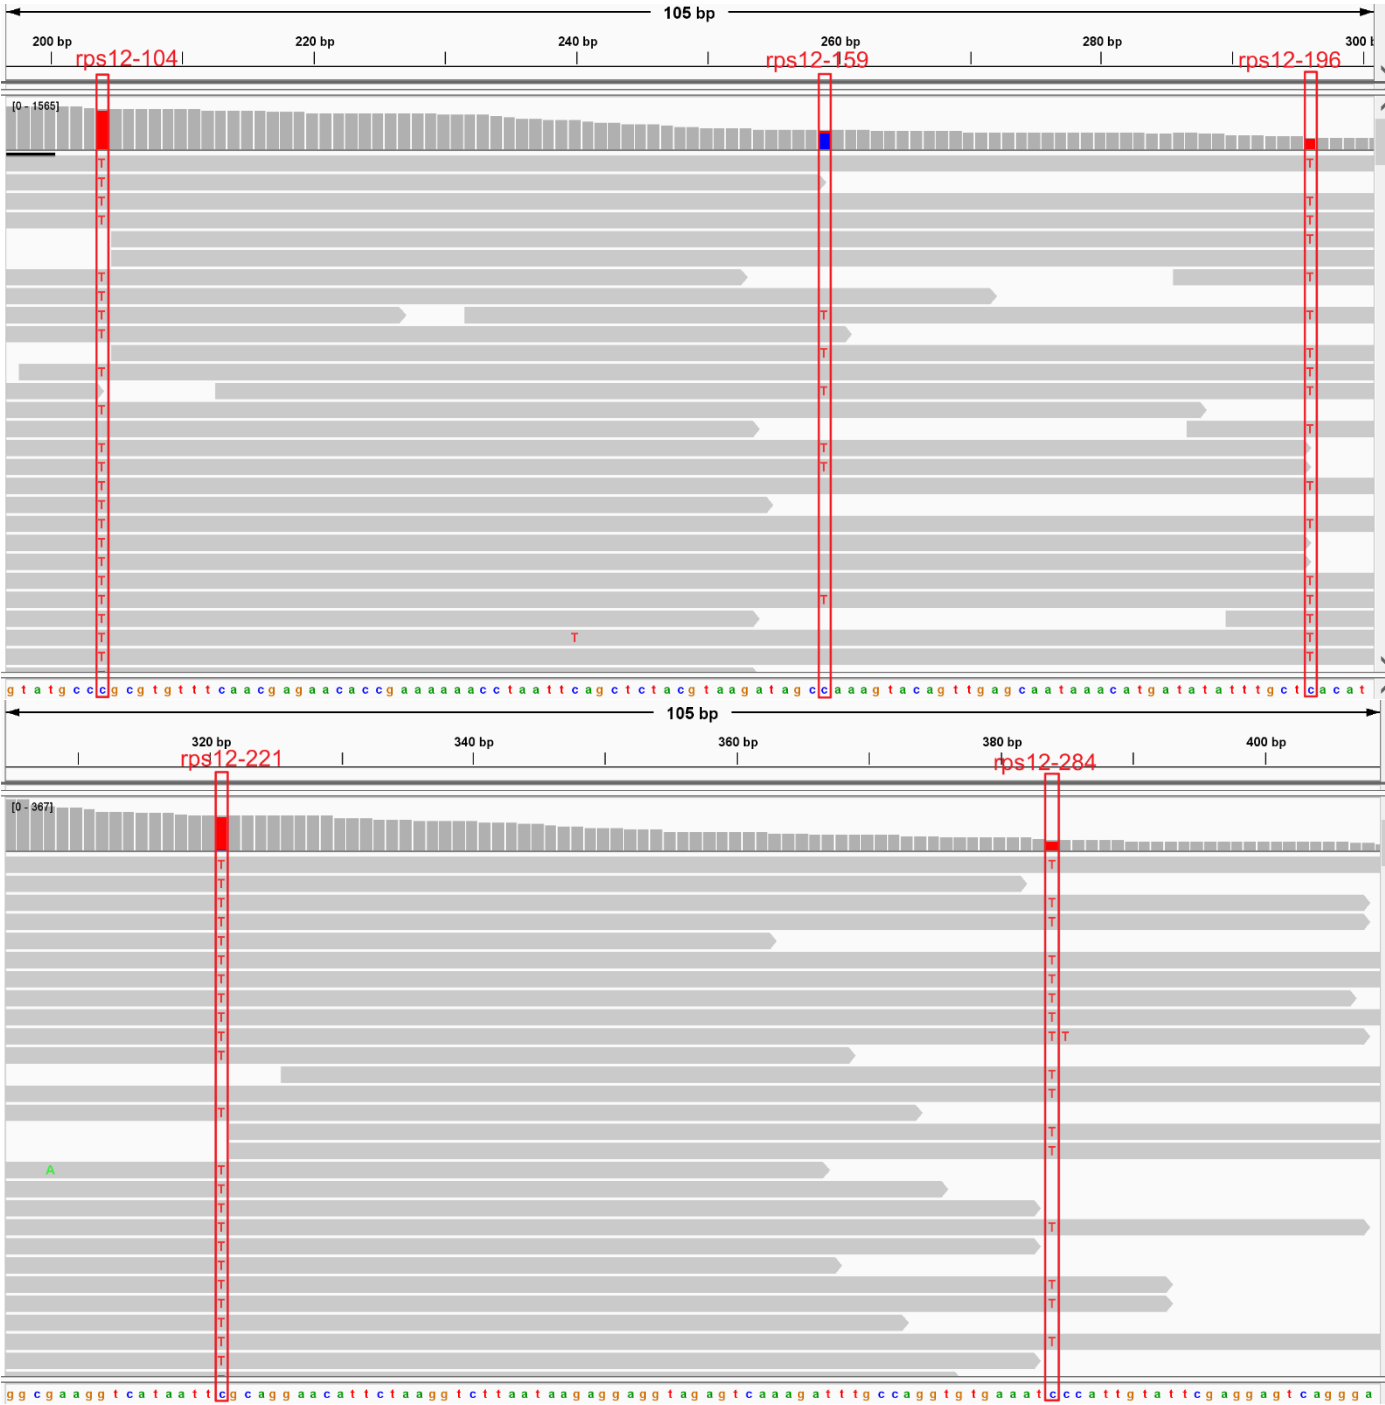

E alignment of RNA-seq reads to the coding sequence of *rps13*. Three RNA-seq editing sites: *rps13*-56, 100, 287 were highlighted in red squares.

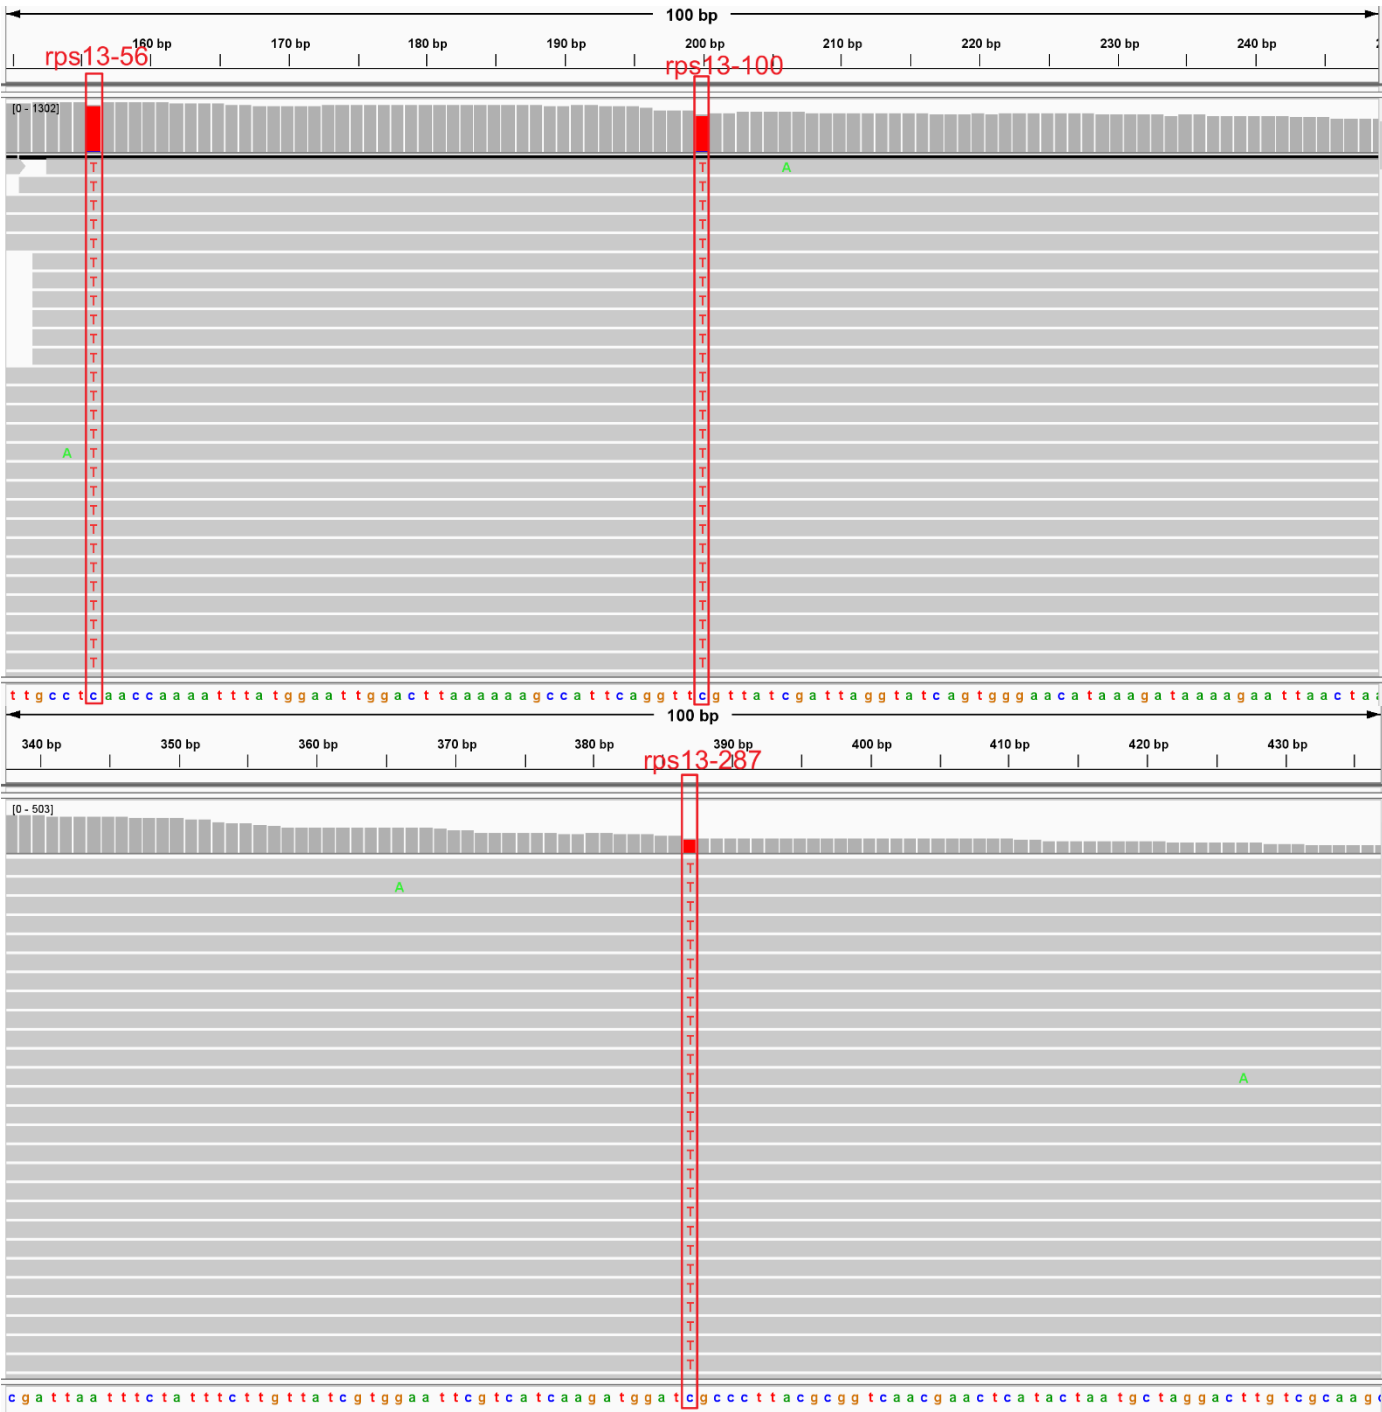



Figure S7 Validation of the RNA editing sites within eleven PCGs using PCR and Sanger sequencing. The top panel shows the sequences and chromatographs from the PCR products amplified using the genomic DNA (gDNA) and complementary DNA (cDNA) as templates. The bottom panel shows the sequences from the PCR products amplified using the gDNA and cDNA. The gene names and the RNA editing sites' positions on the CDs are shown at the bottom of the figure, separated with "-". The red squares highlight the focal RNA editing site.

a validation of the *atp4-59*, *atp4-71*, *atp4-89*, *atp4-118*, *atp4-215*, *atp4-227*, *atp4-248*, *atp4-251*, *atp4-395*, *atp4-407*, and *atp4-416* using PCR amplification and Sanger sequencing experiments.

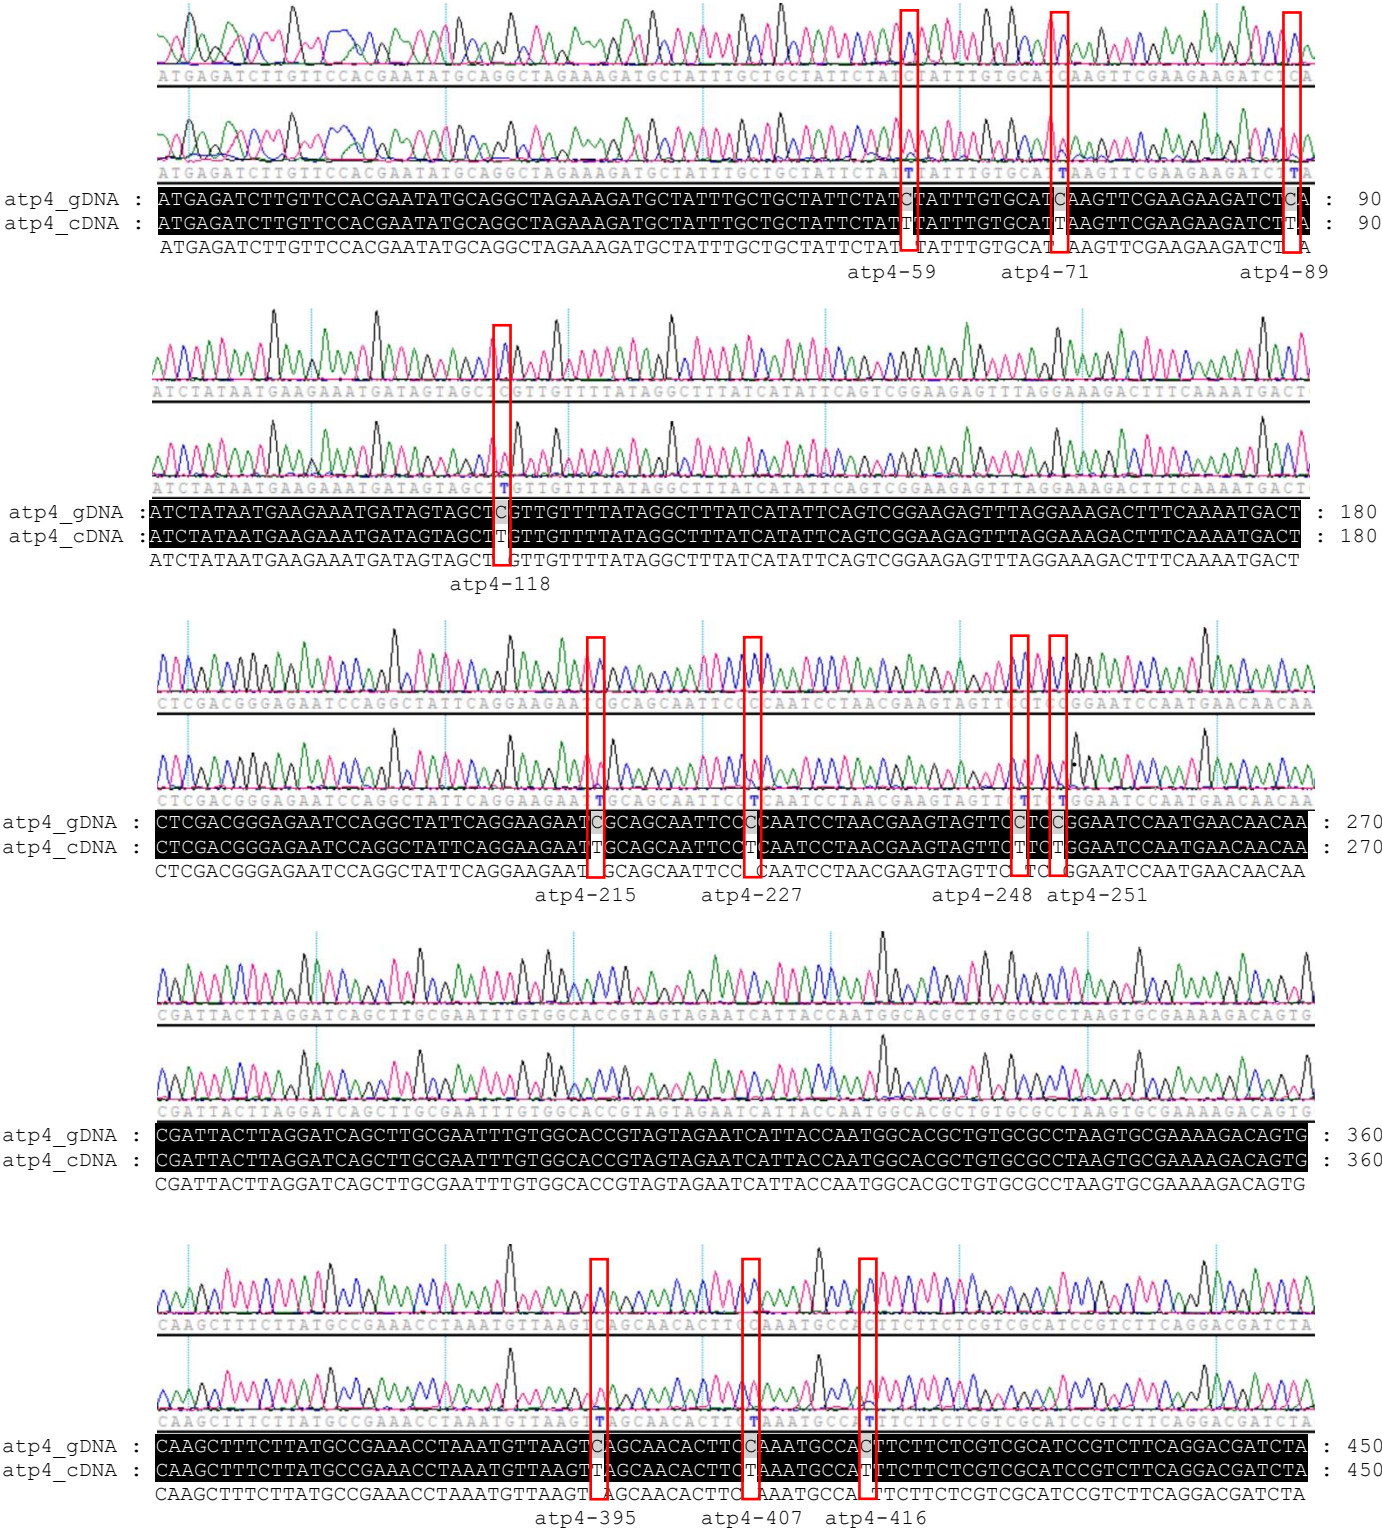

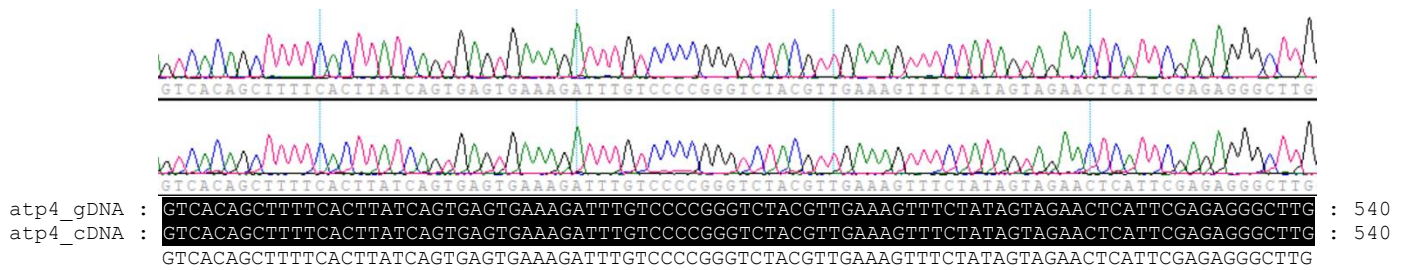

b validation of the *atp8-58* using PCR amplification and Sanger sequencing experiments.

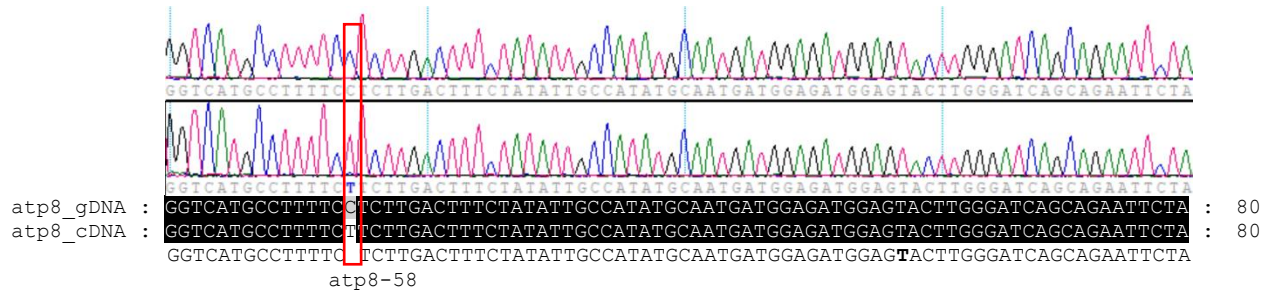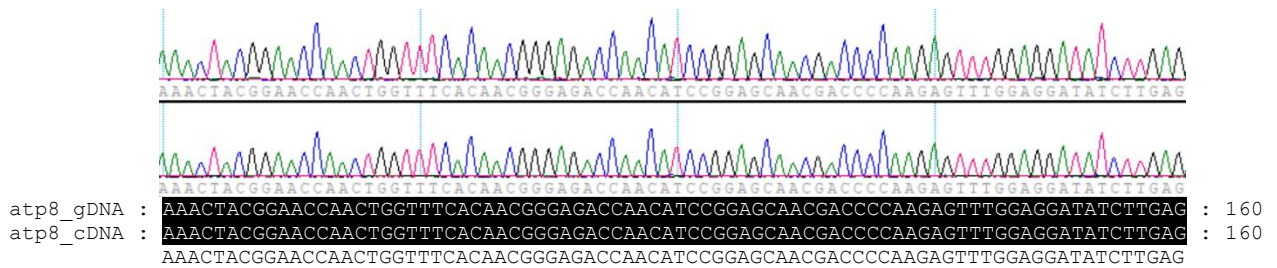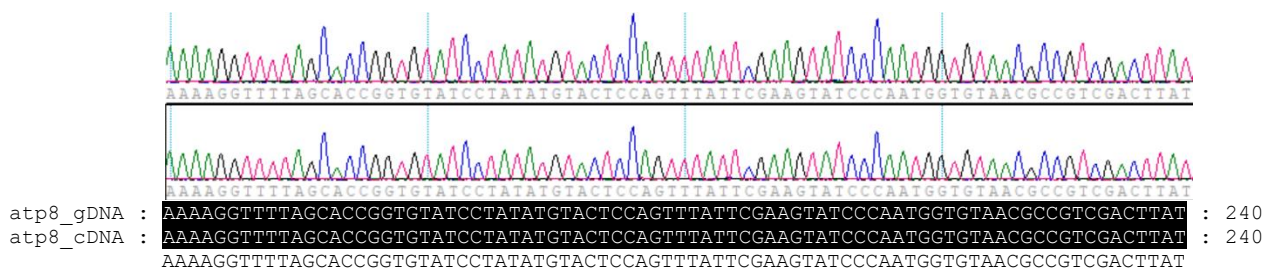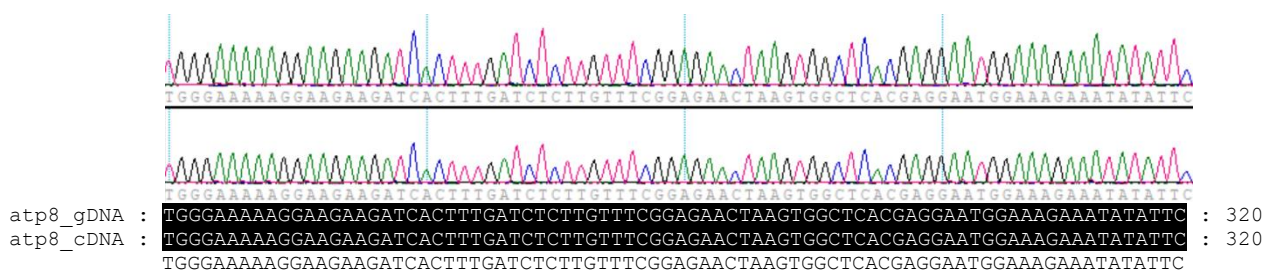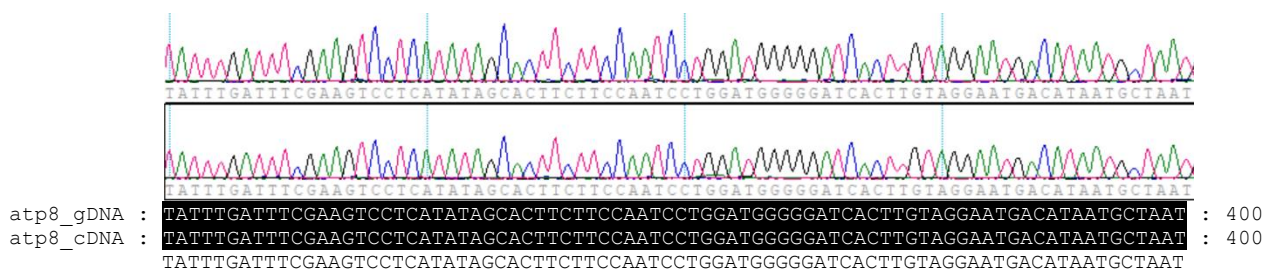



c validation of the *cox1*-242, *cox1*-254, *cox1*-452, *cox1*-515, *cox1*-551, *cox1*-590, *cox1*-715, *cox1*-1186, *cox1*-1405, *cox1*-1433, and *cox1*-1499 using PCR amplification and Sanger sequencing experiments.

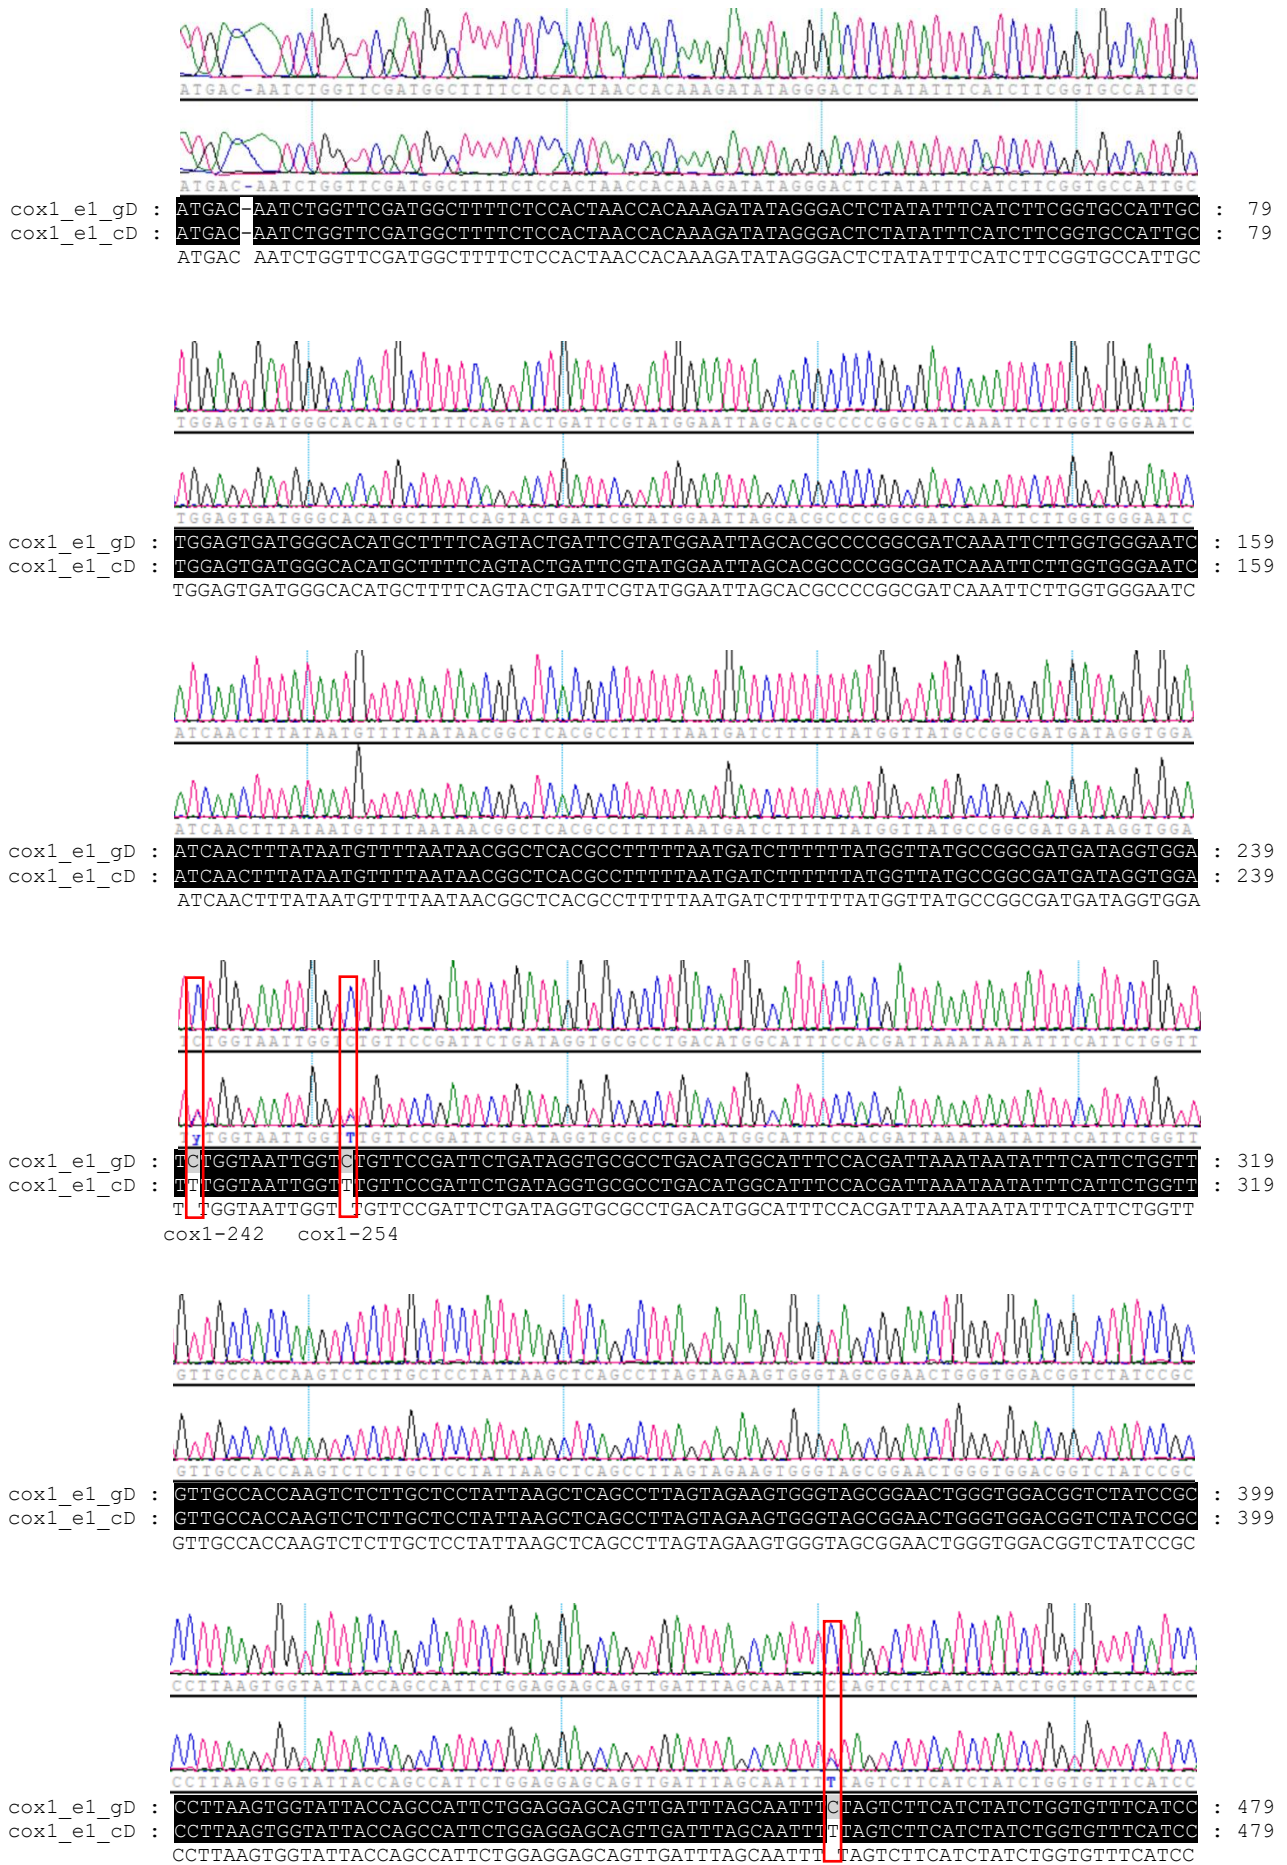

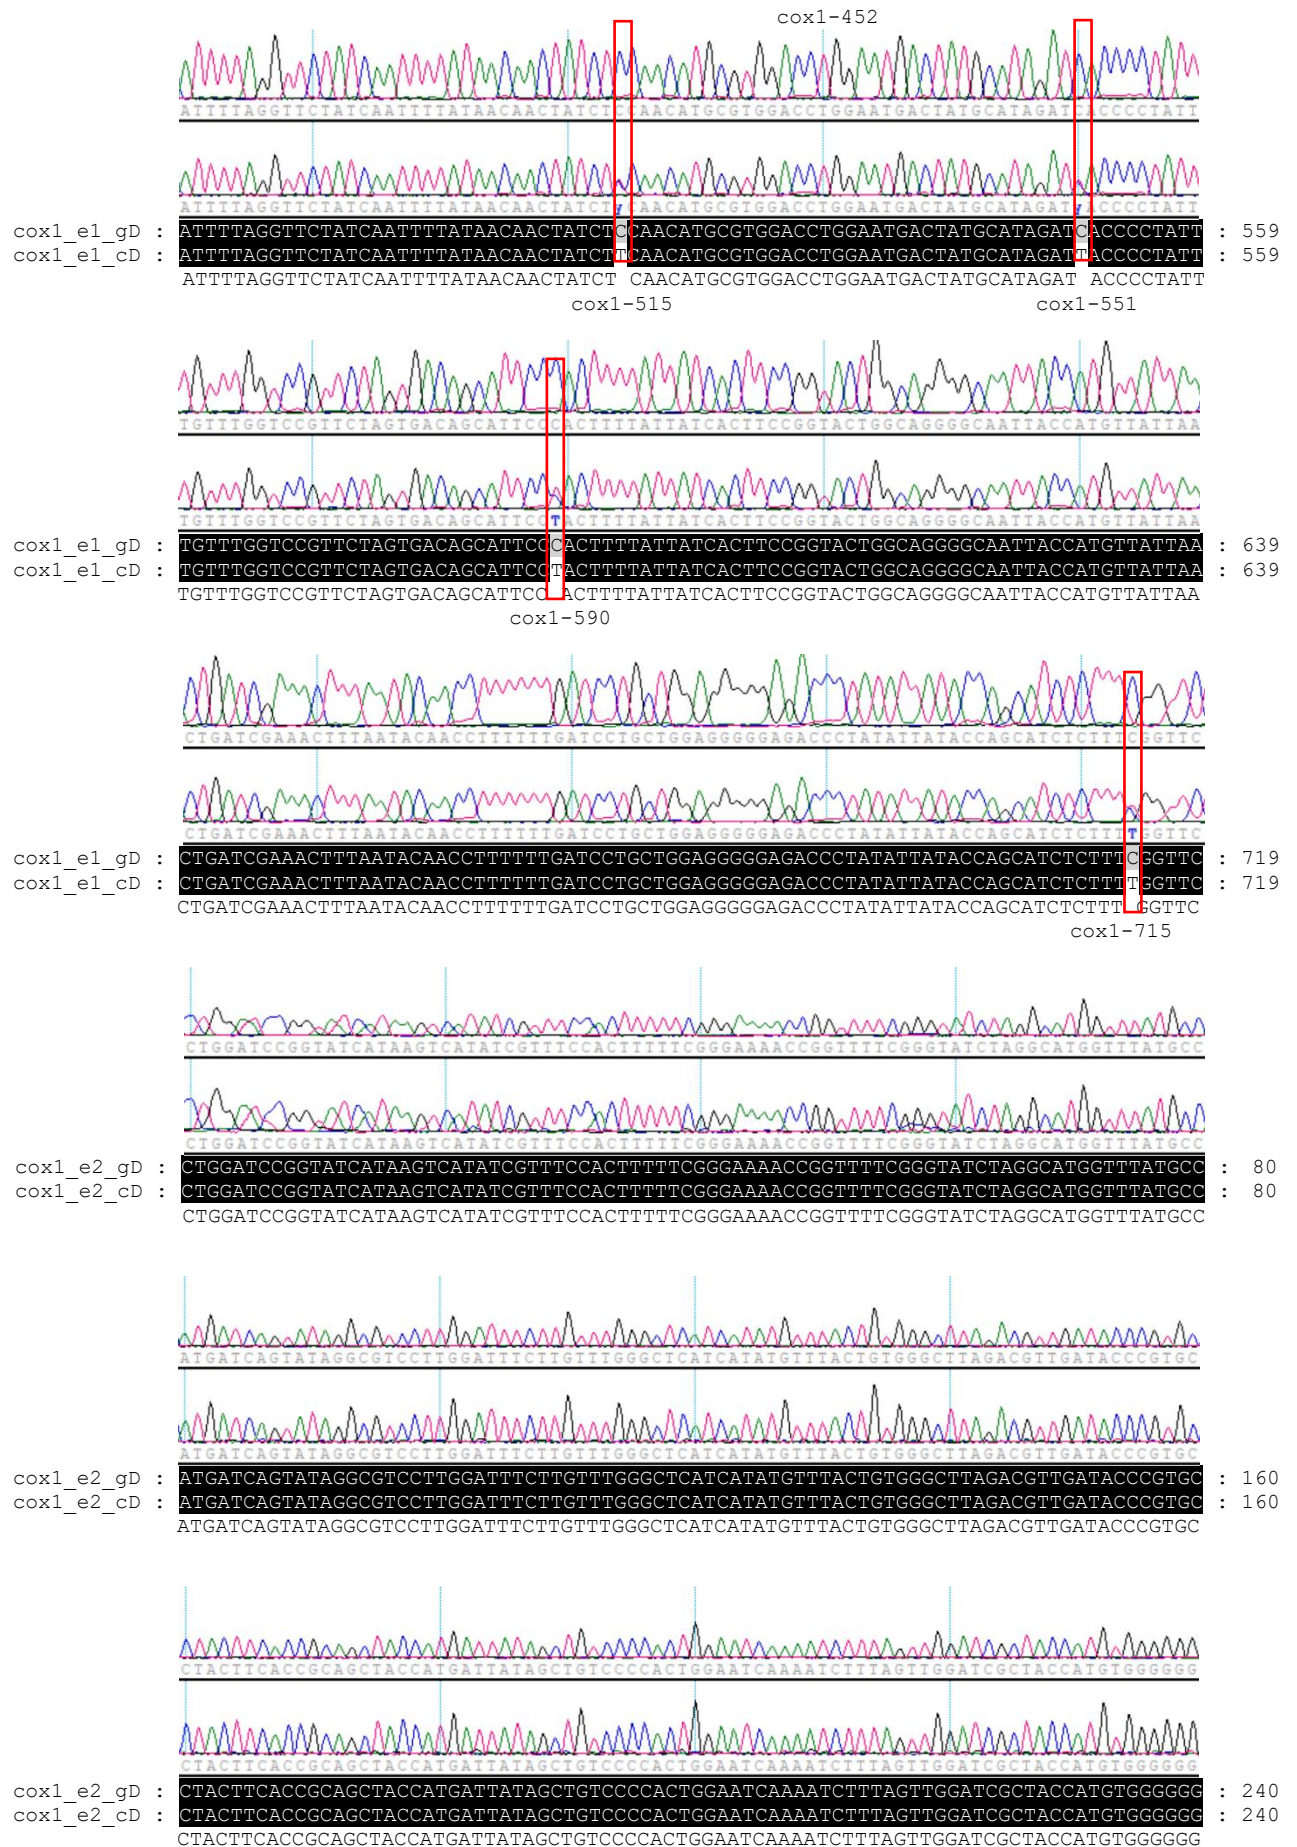

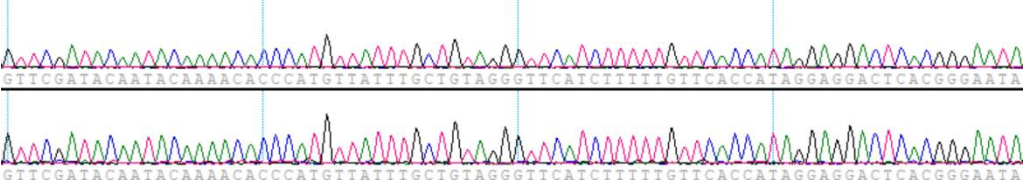

cox1\_e2\_gD : GTTCGATACAATACAAAACACCCATGTTATTTGCTGTAGGGTTCATCTTTTGTTCACCATAGGAGGACTCACGGGAATA : 320  
 cox1\_e2\_cD : GTTCGATACAATACAAAACACCCATGTTATTTGCTGTAGGGTTCATCTTTTGTTCACCATAGGAGGACTCACGGGAATA : 320  
 GTTCGATACAATACAAAACACCCATGTTATTTGCTGTAGGGTTCATCTTTTGTTCACCATAGGAGGACTCACGGGAATA

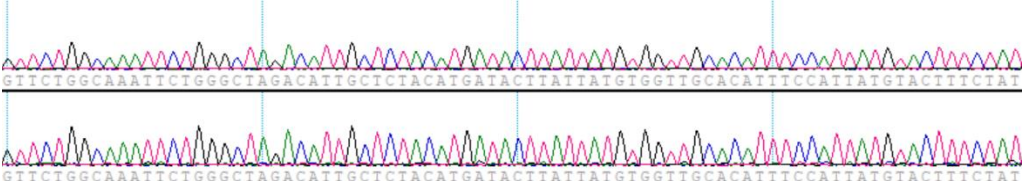

cox1\_e2\_gD : GTTCTGGCAAATCTCTGGGCTAGACATTGCTCTACATGATACTTATTATGTGGTTGCACATTTCCATTATGTACTTTCTAT : 400  
 cox1\_e2\_cD : GTTCTGGCAAATCTCTGGGCTAGACATTGCTCTACATGATACTTATTATGTGGTTGCACATTTCCATTATGTACTTTCTAT : 400  
 GTTCTGGCAAATCTCTGGGCTAGACATTGCTCTACATGATACTTATTATGTGGTTGCACATTTCCATTATGTACTTTCTAT



cox1\_e2\_gD : GGGAGCCGTTTTTGCTTTATTTGCAGGATTTTACTATTGGGTAGGTAAAATCTTTGGTTCGGACATACCCTGAAACTTTAG : 480  
 cox1\_e2\_cD : GGGAGCCGTTTTTGCTTTATTTGCAGGATTTTACTATTGGGTAGGTAAAATCTTTGGTTCGGACATACCCTGAAACTTTAG : 480  
 GGGAGCCGTTTTTGCTTTATTTGCAGGATTTTACTATTGGGTAGGTAAAATCTTTGGTTCGGACATACCCTGAAACTTTAG  
 cox1-1186

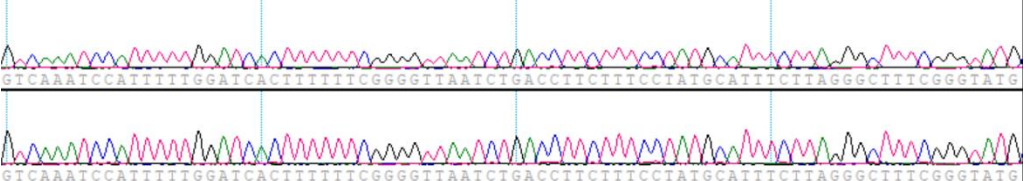

cox1\_e2\_gD : GTCAAATCCATTTTGGATCACTTTTTTCGGGGTTAATCTGACCTTCTTTCCATATGCATTTCTAGGGCTTTTCGGGTATG : 560  
 cox1\_e2\_cD : GTCAAATCCATTTTGGATCACTTTTTTCGGGGTTAATCTGACCTTCTTTCCATATGCATTTCTAGGGCTTTTCGGGTATG : 560  
 GTCAAATCCATTTTGGATCACTTTTTTCGGGGTTAATCTGACCTTCTTTCCATATGCATTTCTAGGGCTTTTCGGGTATG

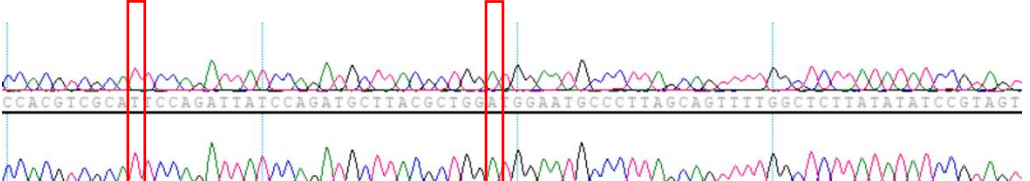

cox1\_e2\_gD : CCACGTCGCATTCCAGATTATCCAGATGCTTACGCTGGATGGAATGCCCTTAGCAGTTTGGCTCTTATATATCCGTAGT : 640  
 cox1\_e2\_cD : CCACGTCGCATTCCAGATTATCCAGATGCTTACGCTGGATGGAATGCCCTTAGCAGTTTGGCTCTTATATATCCGTAGT : 640  
 CCACGTCGCATTCCAGATTATCCAGATGCTTACGCTGGATGGAATGCCCTTAGCAGTTTGGCTCTTATATATCCGTAGT

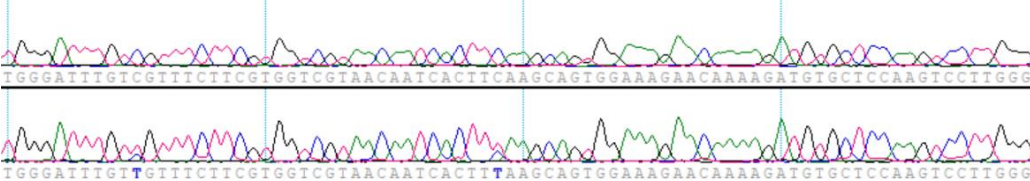

cox1\_e2\_gD : TGGGATTGTGTTTCTTCGTGGTTCGTAACAATCACTTTAAGCAGTGGAAAGAACAAAAGATGTGCTCCAAGTCCTTGGG : 720  
 cox1\_e2\_cD : TGGGATTGTGTTTCTTCGTGGTTCGTAACAATCACTTTAAGCAGTGGAAAGAACAAAAGATGTGCTCCAAGTCCTTGGG : 720  
 TGGGATTGTGTTTCTTCGTGGTTCGTAACAATCACTTTAAGCAGTGGAAAGAACAAAAGATGTGCTCCAAGTCCTTGGG  
 cox1-1405 cox1-1433



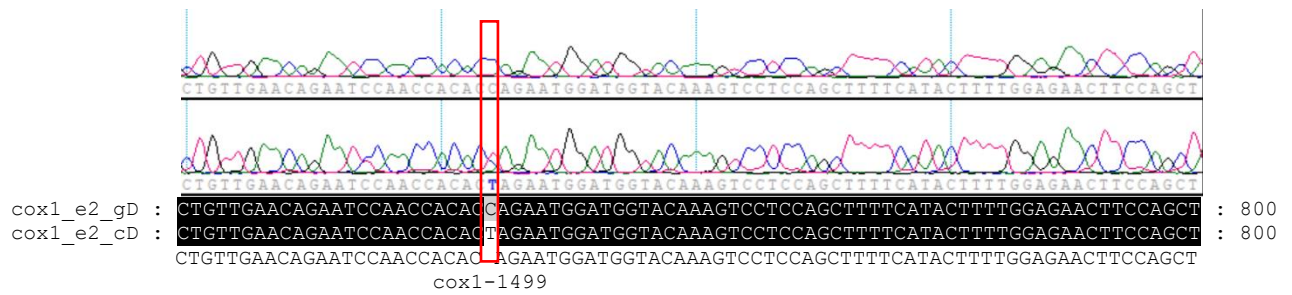

d validation of the *cox3*-245, *cox3*-304, *cox3*-311, *cox3*-314, *cox3*-419, *cox3*-422, *cox3*-566, *cox3*-754, and *cox3*-764 using PCR amplification and Sanger sequencing experiments.

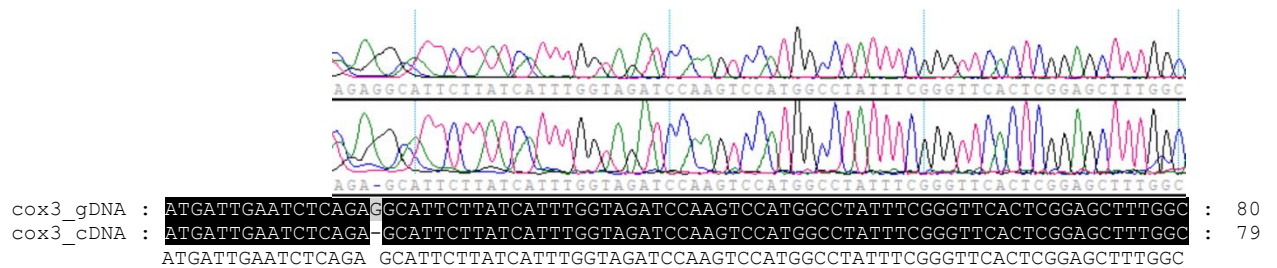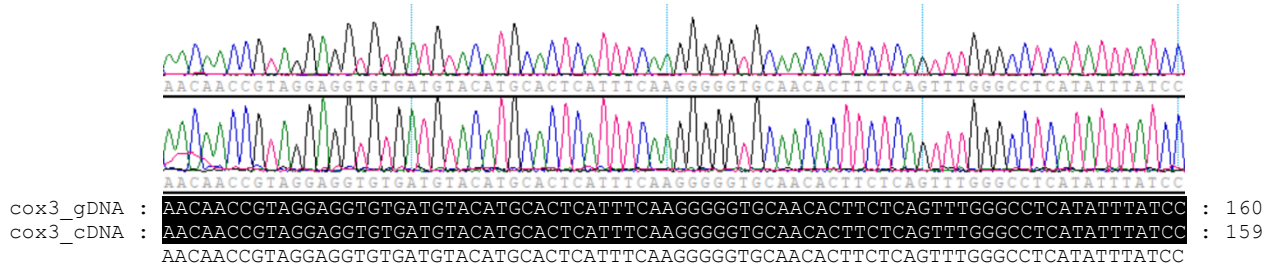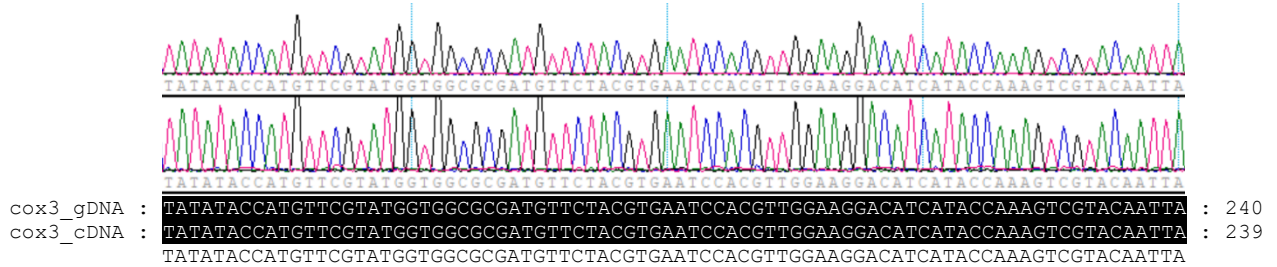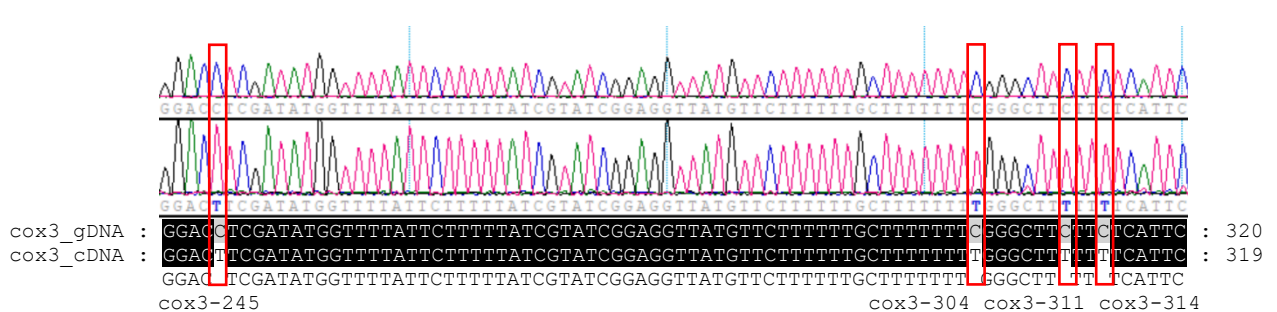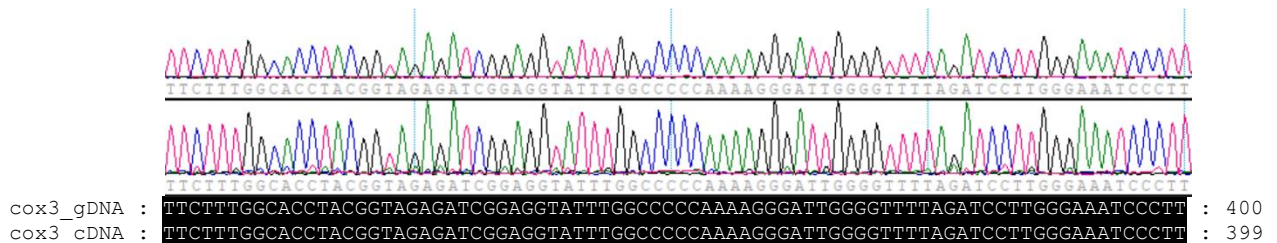

TTCTTTGGCACCTACGGTAGAGATCGGAGGTATTTGGCCCCAAAAGGGATTGGGGTTTTAGATCCTTGGGAAATCCCTT

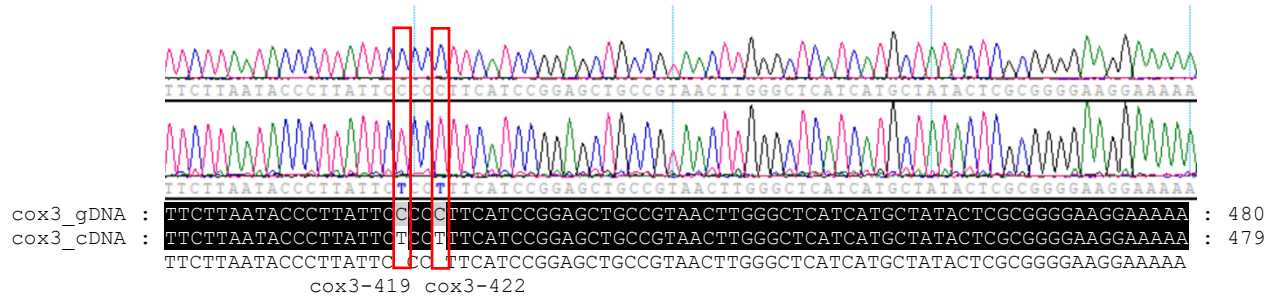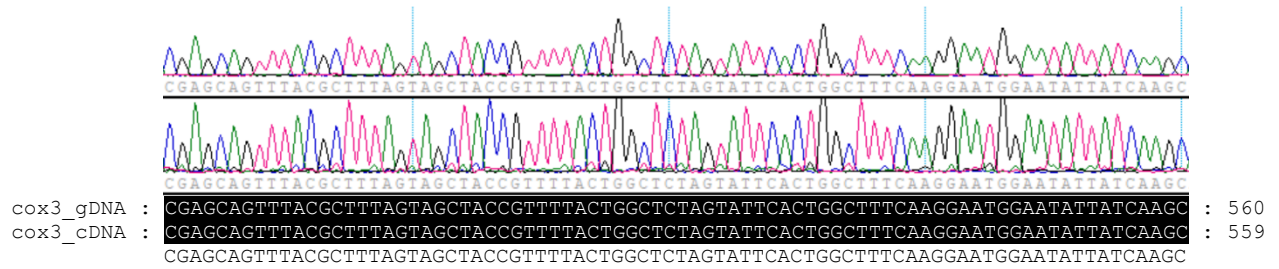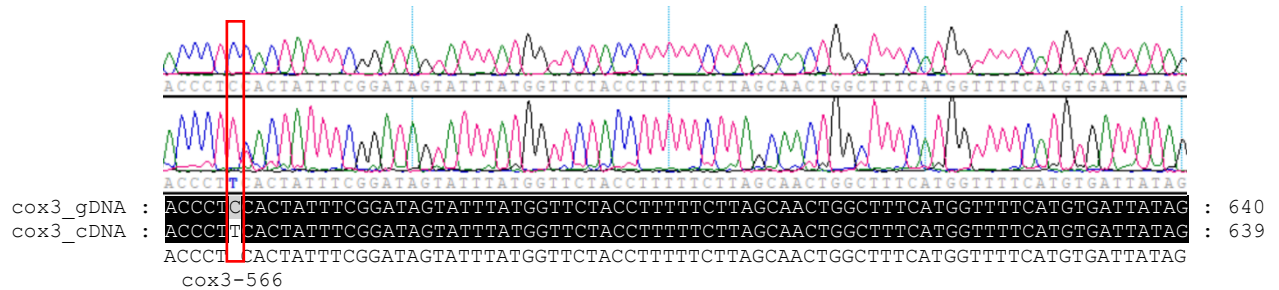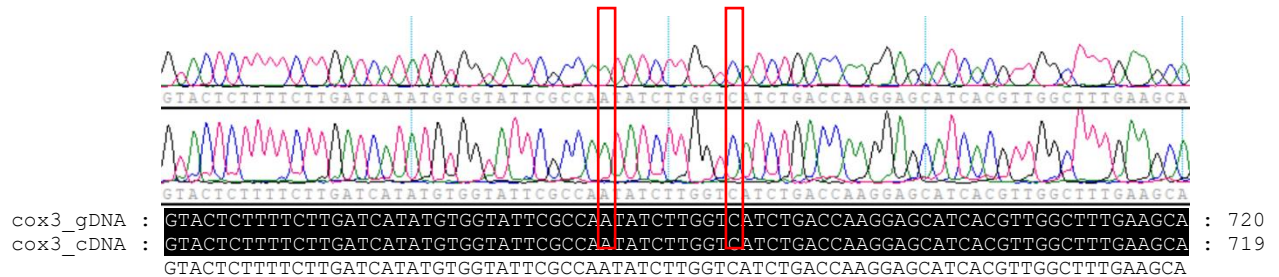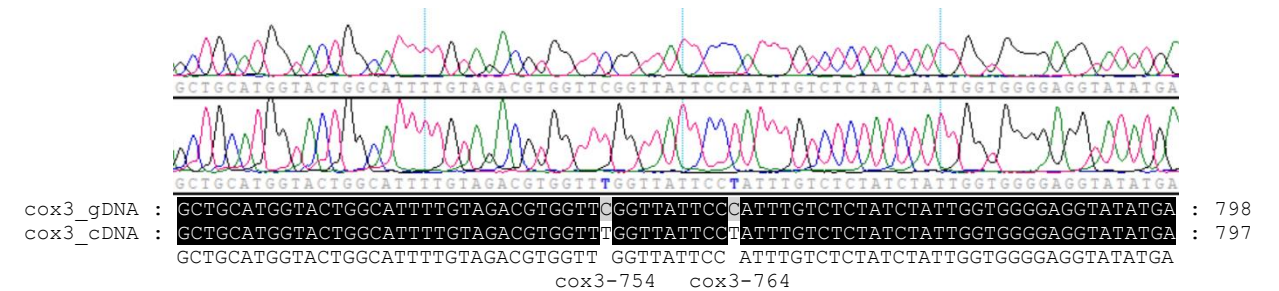

e validation of the *mttB*-16, *mttB*-26, *mttB*-64, *mttB*-100, *mttB*-112, *mttB*-128, *mttB*-131, *mttB*-178, *mttB*-188, *mttB*-202, *mttB*-236, *mttB*-262, *mttB*-328, *mttB*-331, *mttB*-344, *mttB*-346, *mttB*-373, *mttB*-376, *mttB*-379, *mttB*-407, *mttB*-472, *mttB*-497, *mttB*-505, *mttB*-541, *mttB*-554, *mttB*-578, *mttB*-610, *mttB*-616, *mttB*-667, and *mttB*-713 using PCR amplification and Sanger sequencing experiments.

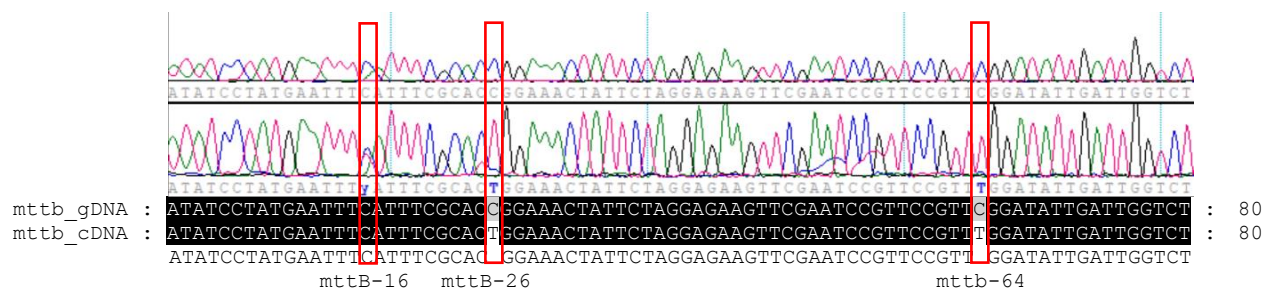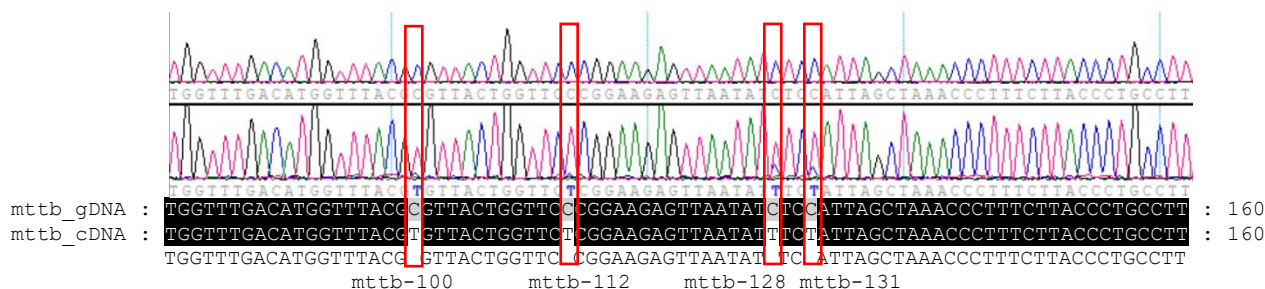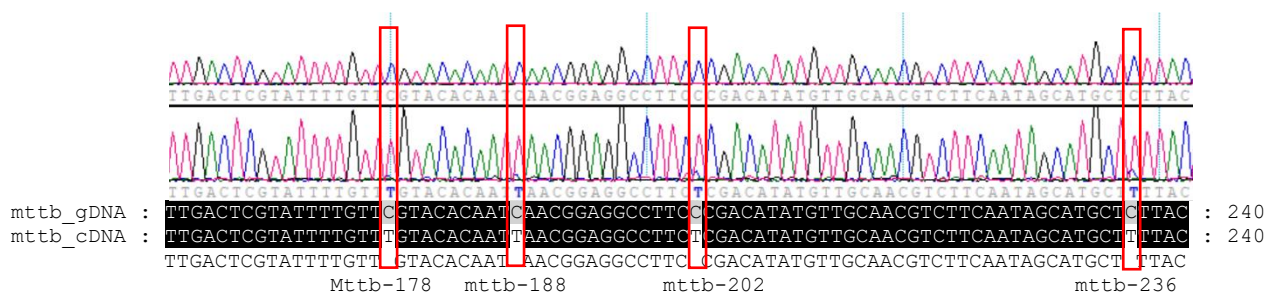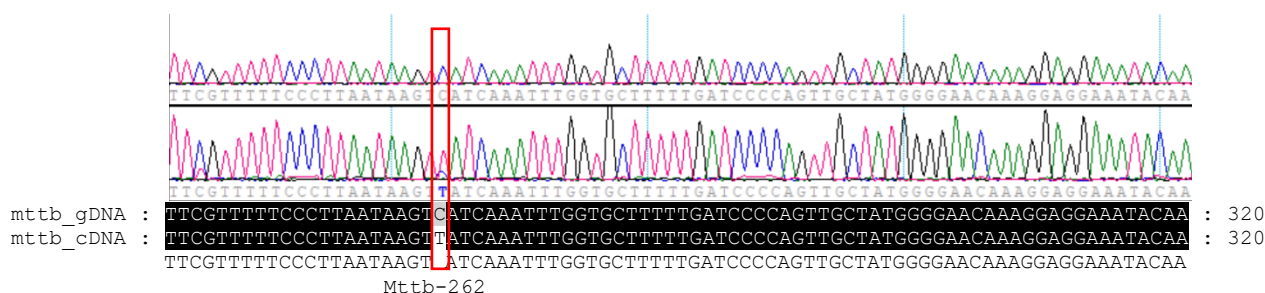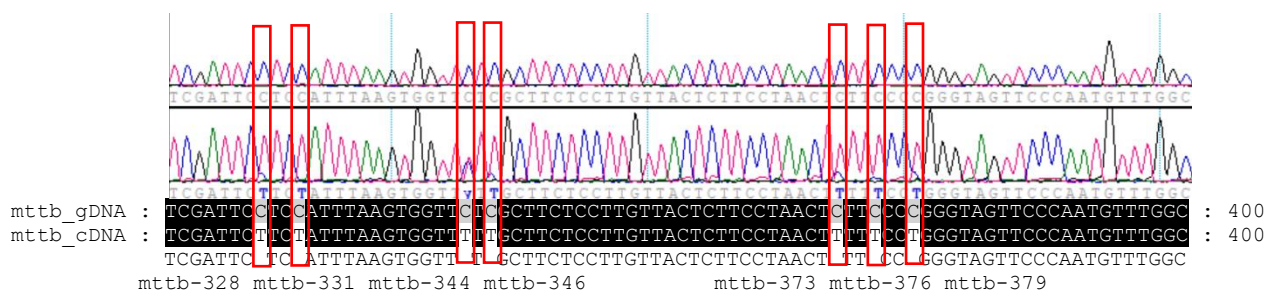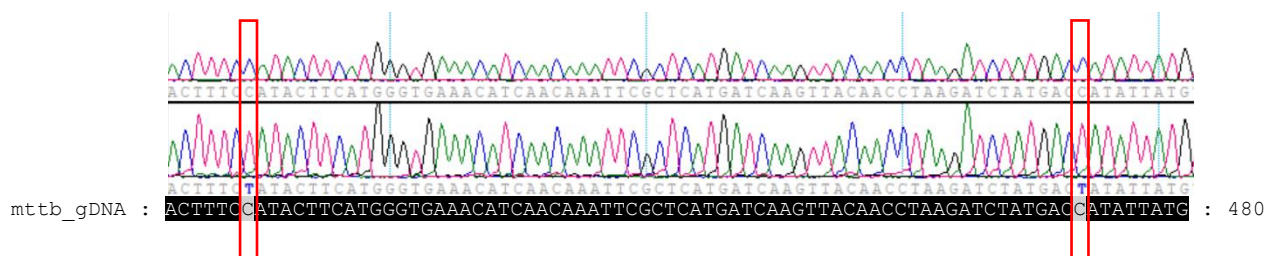



mttb\_cDNA : ACTTTCATACTTCATGGGTGAAACATCAACAAATTCGCTCATGATCAAGTTACAACCTAAGATCTATGACTATATTATG : 480  
 ACTTTCATACTTCATGGGTGAAACATCAACAAATTCGCTCATGATCAAGTTACAACCTAAGATCTATGACATATTATG  
 mttb-407 mttb-472

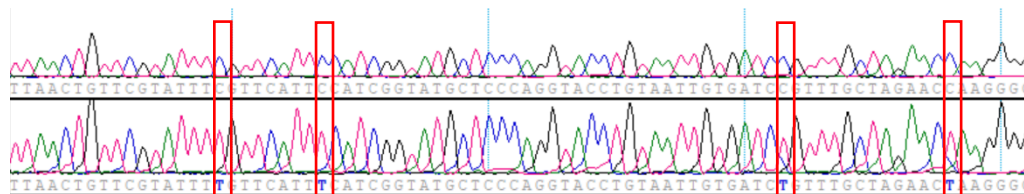

mttb\_gDNA : TTAACGTTCGTATTTCTTCATTTCATCGGTATGCTCCAGGTACCTGTAATTGTGATCTTTTGCTAGAACCAAGGGG : 560  
 mttb\_cDNA : TTAACGTTCGTATTTCTTCATTTCATCGGTATGCTCCAGGTACCTGTAATTGTGATCTTTTGCTAGAACCAAGGGG : 560  
 mttb-497 mttb-505 mttb-541 mttb-554

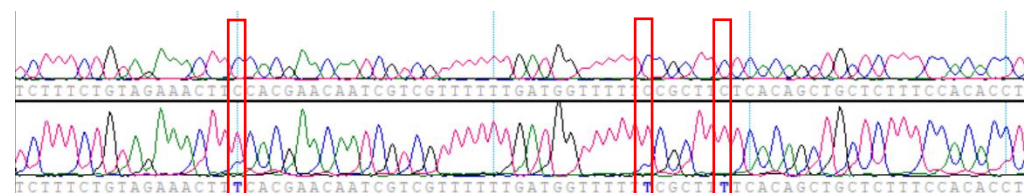

mttb\_gDNA : TCTTTCTGTAGAACTTCACGAACAATCGTCGTTTTTGTGGTTTTTCGCTTCACAGCTGCTCTTTCCACACCTC : 640  
 mttb\_cDNA : TCTTTCTGTAGAACTTCACGAACAATCGTCGTTTTTGTGGTTTTTCGCTTCACAGCTGCTCTTTCCACACCTC : 640  
 mttb-578 mttb-610 mttb-616

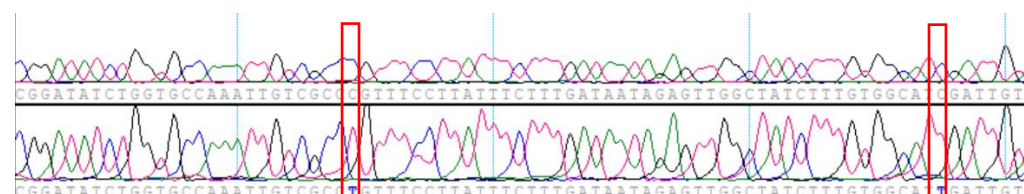

mttb\_gDNA : CCGATATCTGGTGCCAAATTGTCGCCCTTTCCTTATTTCTTTGATAATAGAGTTGGCTATCTTTGTGGCATCGATTGTA : 720  
 mttb\_cDNA : CCGATATCTGGTGCCAAATTGTCGCCCTTTCCTTATTTCTTTGATAATAGAGTTGGCTATCTTTGTGGCATCGATTGTA : 720  
 mttb-667 mttb-713

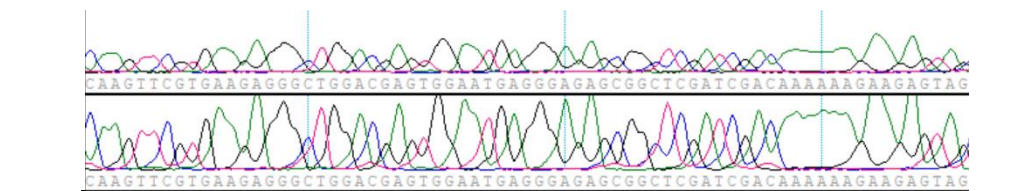

mttb\_gDNA : CAAGTTCGTGAAGAGGGCTGGACGAGTGGAATGAGGGAGAGCGGCTCGATCGACAAAAAAGAAGAGTAG : 789  
 mttb\_cDNA : CAAGTTCGTGAAGAGGGCTGGACGAGTGGAATGAGGGAGAGCGGCTCGATCGACAAAAAAGAAGAGTAG : 789  
 CAAGTTCGTGAAGAGGGCTGGACGAGTGGAATGAGGGAGAGCGGCTCGATCGACAAAAAAGAAGAGTAG

f validation of the *nad3-44*, *nad3-62*, *nad3-79*, *nad3-80*, *nad3-124*, *nad3-146*, *nad3-208*, *nad3-209*, *nad3-215*, *nad3-230*, *nad3-247*, *nad3-251*, *nad3-266*, *nad3-275*, *nad3-317*, *nad3-344*, and *nad3-349* using PCR amplification and Sanger sequencing experiments.

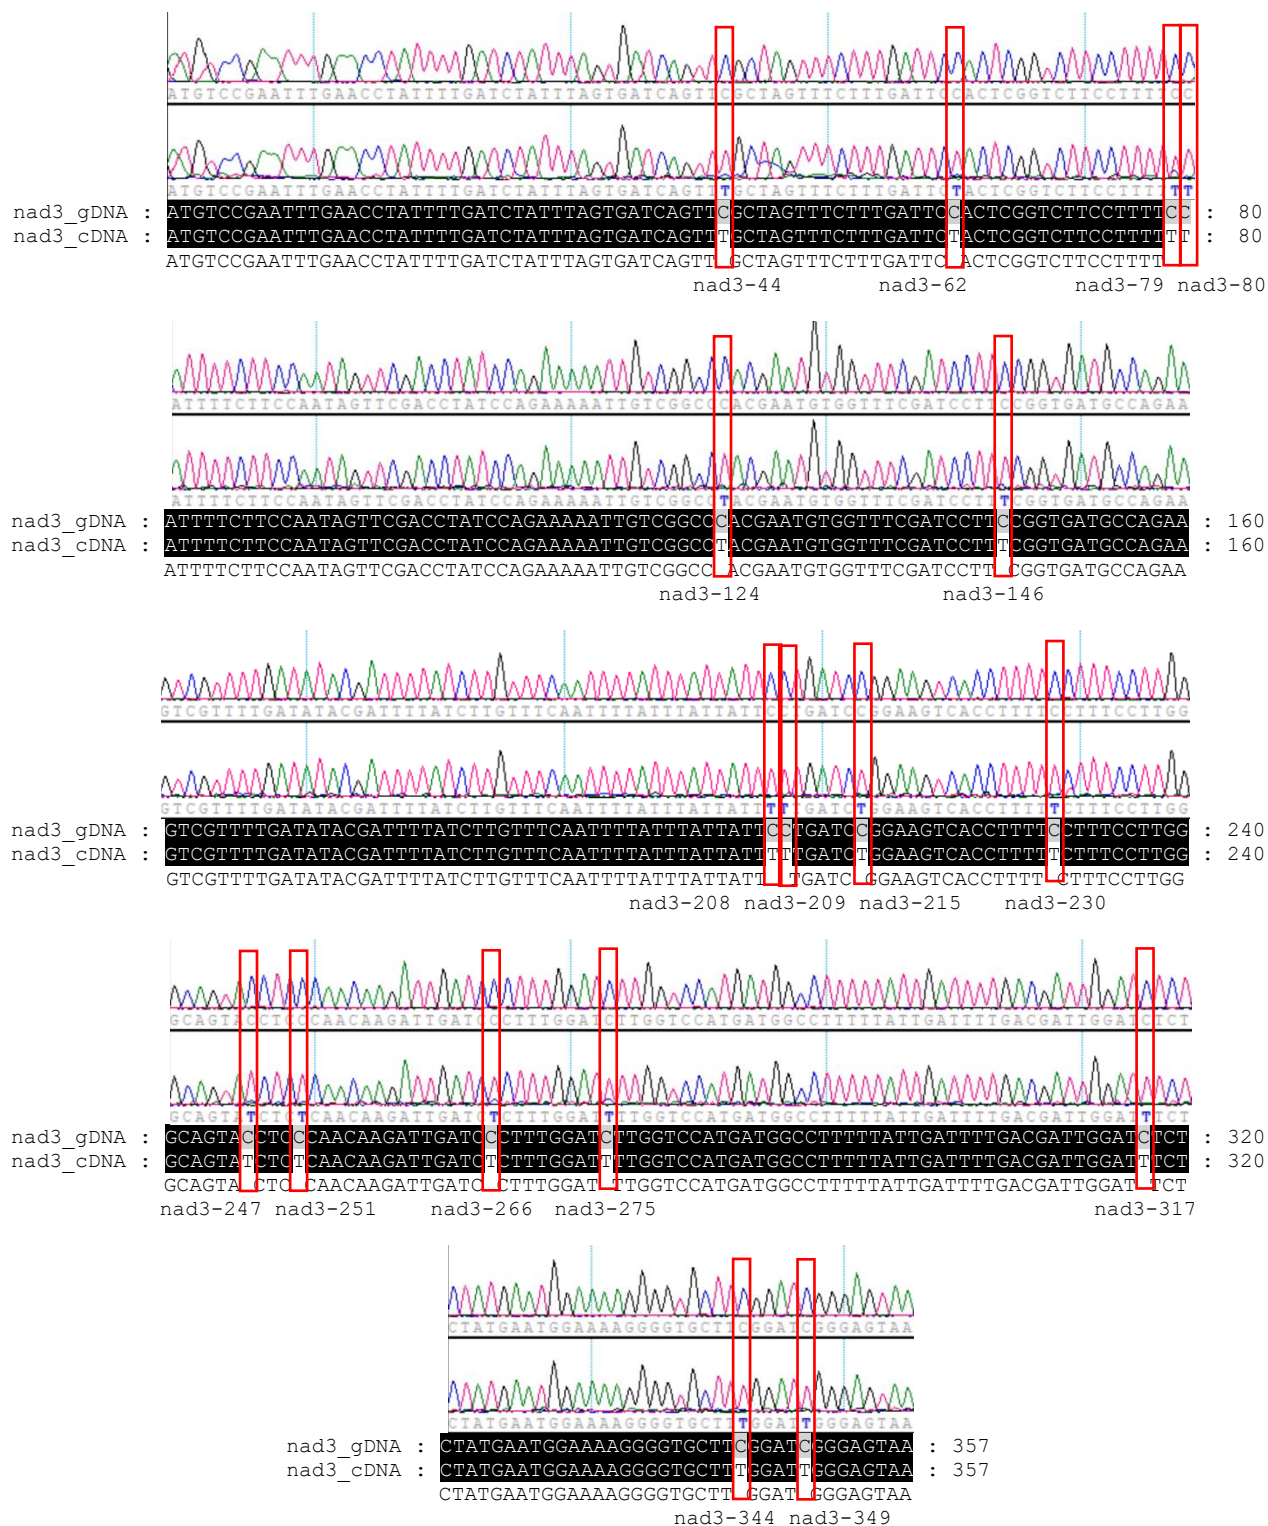

g validation of the *nad4L*-11, *nad4L*-17, *nad4L*-25, *nad4L*-56, *nad4L*-65, *nad4L*-70, *nad4L*-80, *nad4L*-101, *nad4L*-128, *nad4L*-149, *nad4L*-158, *nad4L*-167, *nad4L*-222, and *nad4L*-251 using PCR amplification and Sanger sequencing experiments.

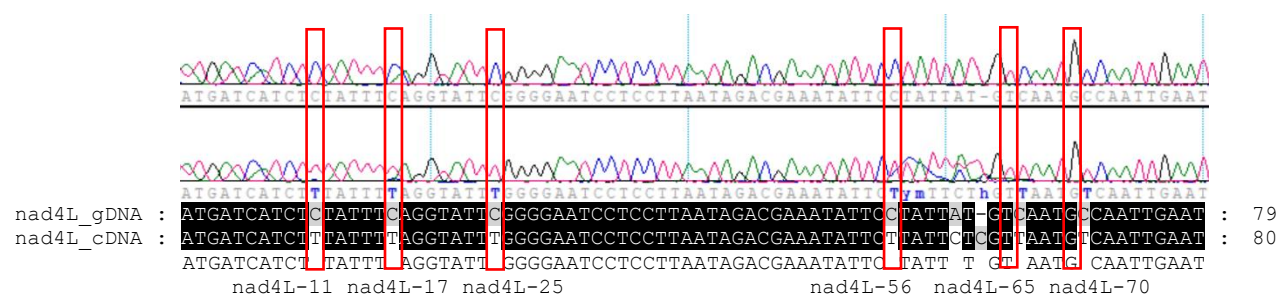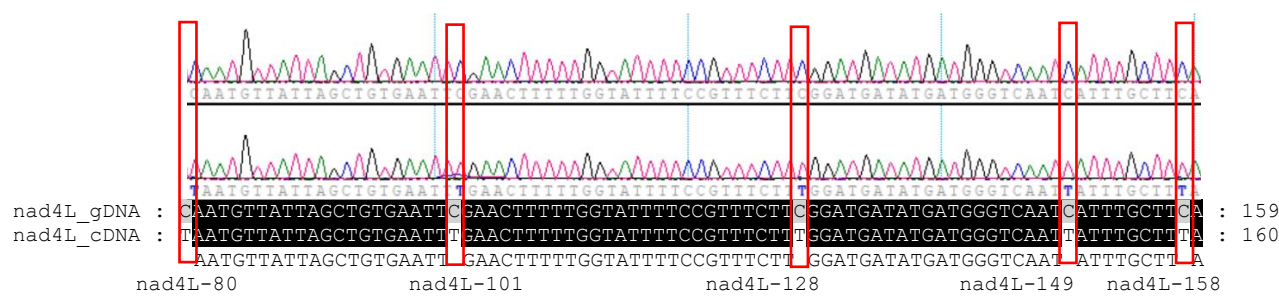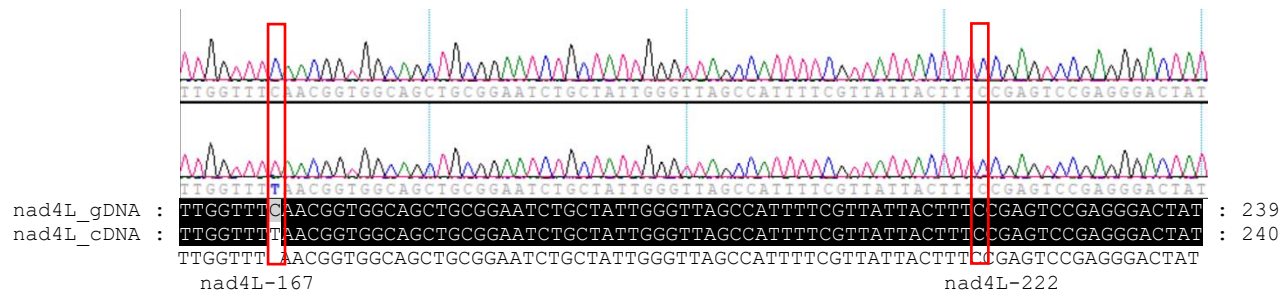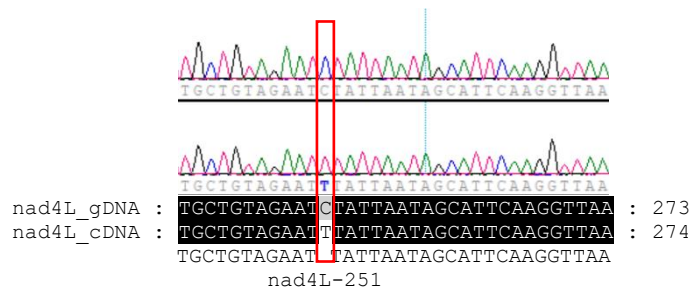



h validation of the *nad9-15*, *nad9-92*, *nad9-113*, *nad9-167*, *nad9-298*, *nad9-328*, *nad9-368*, *nad9-398*, and *nad9-439* using PCR amplification and Sanger sequencing experiments.

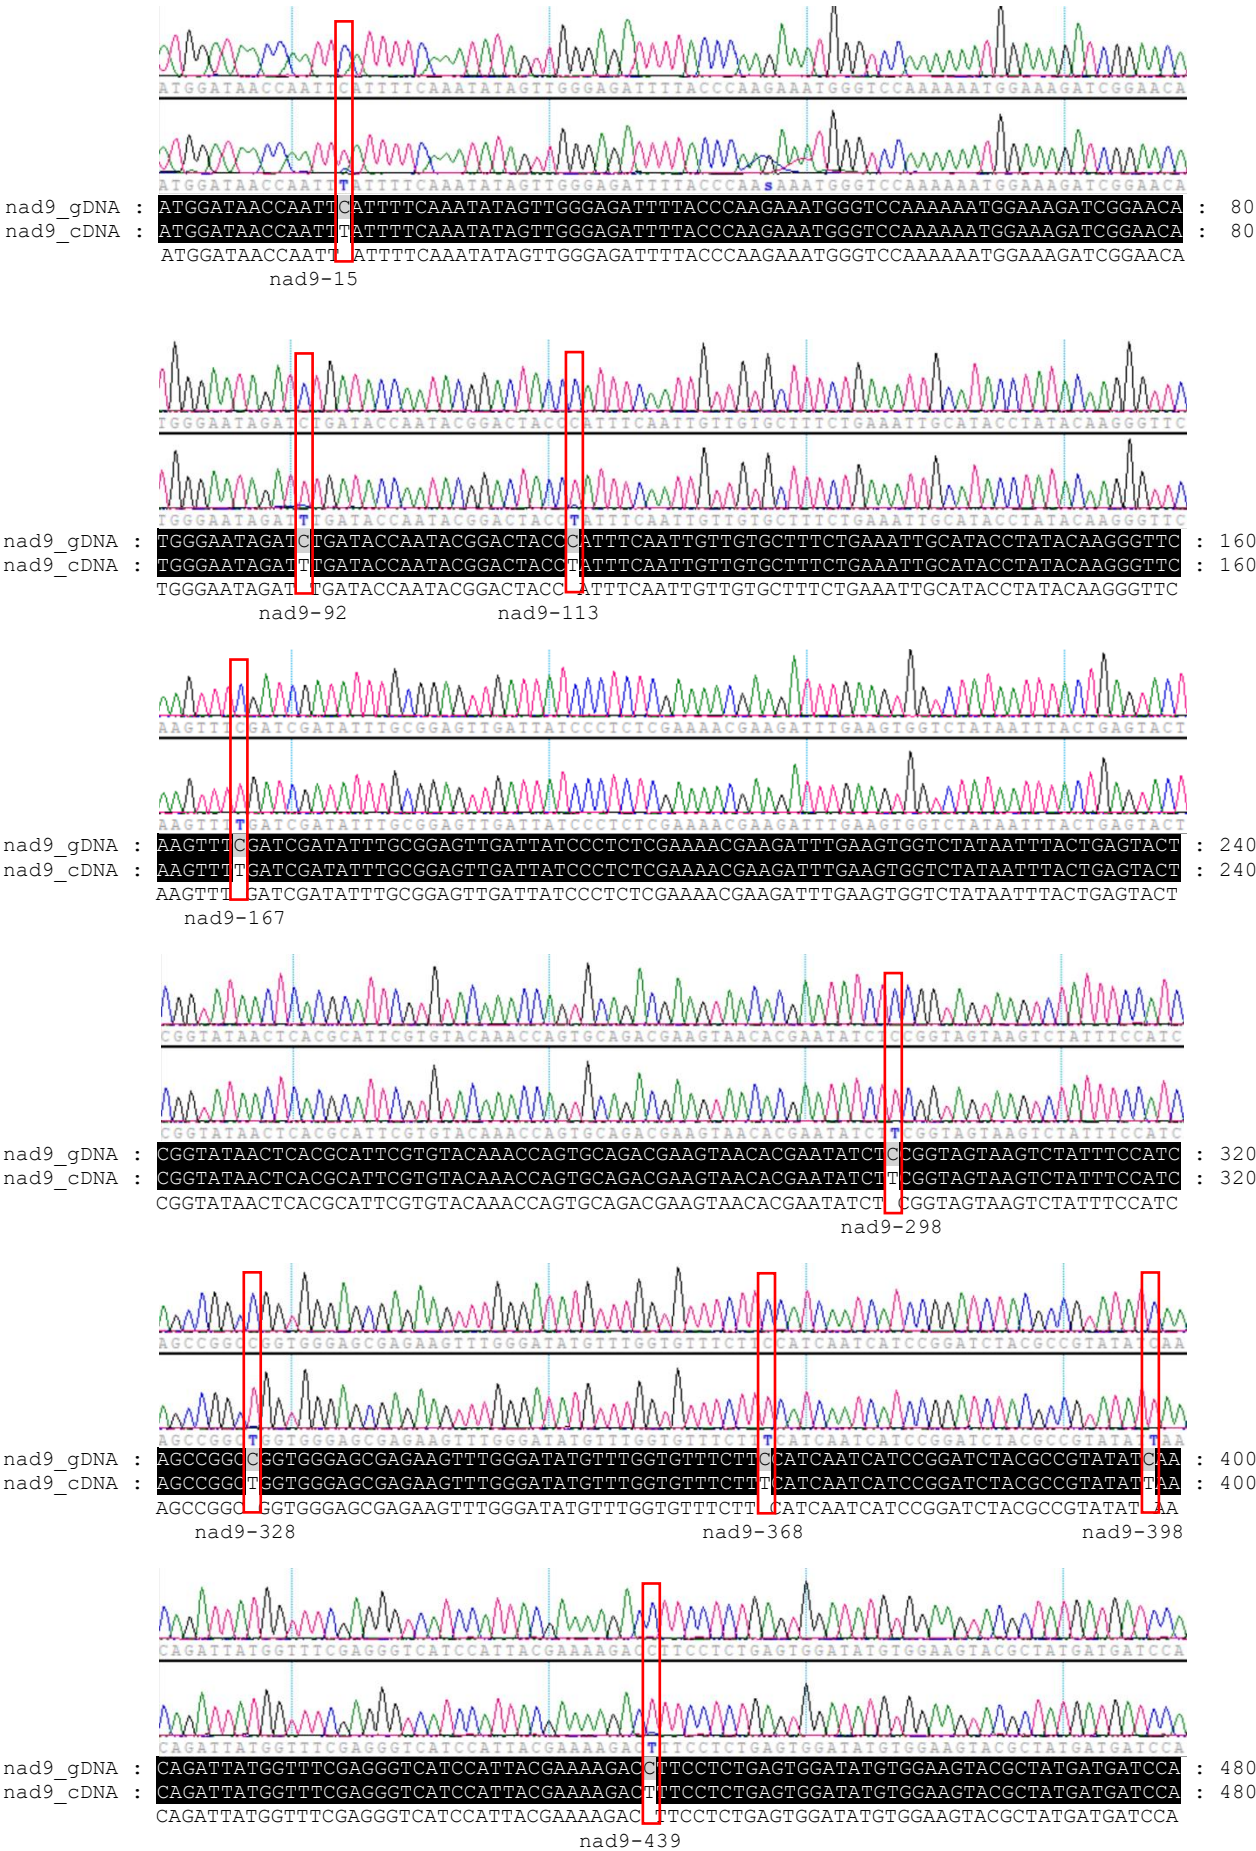

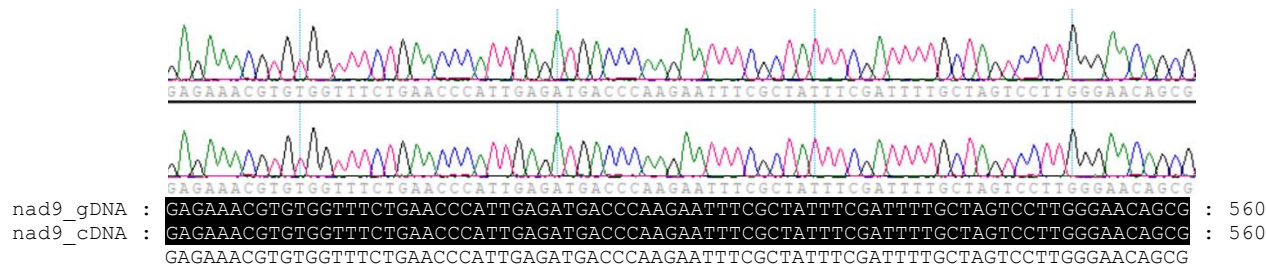

i validation of the *rp15-35*, *rp15-47*, *rp15-160*, *rp15-509*, *rp15-512*, and *rp15-529* using PCR amplification and Sanger sequencing experiments.

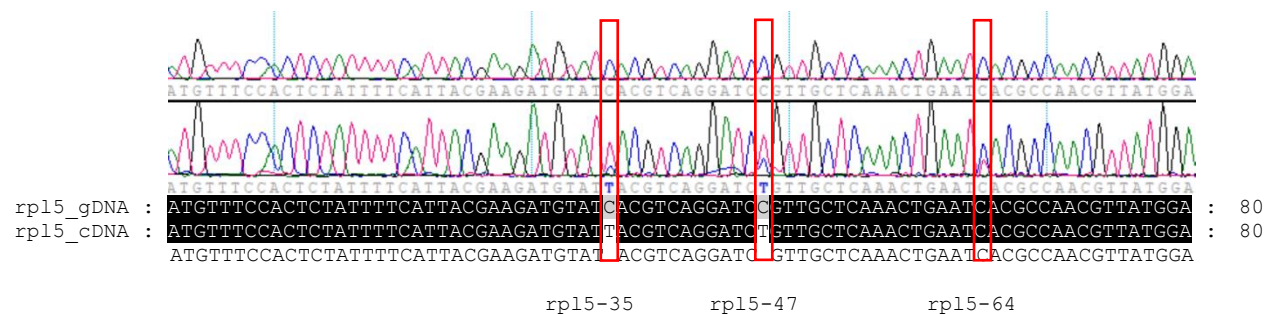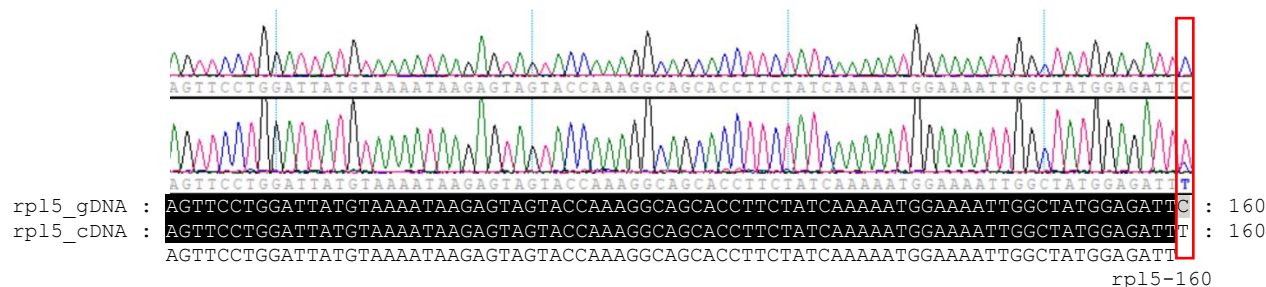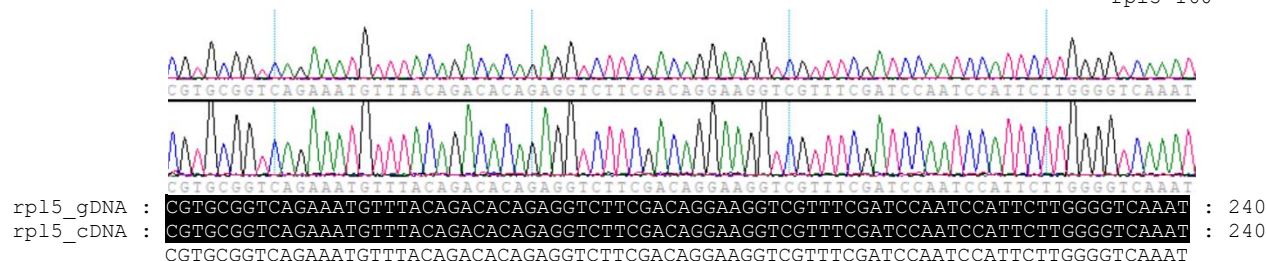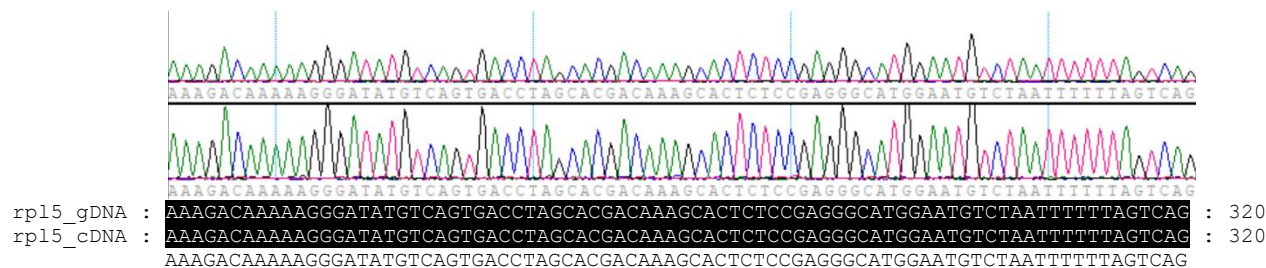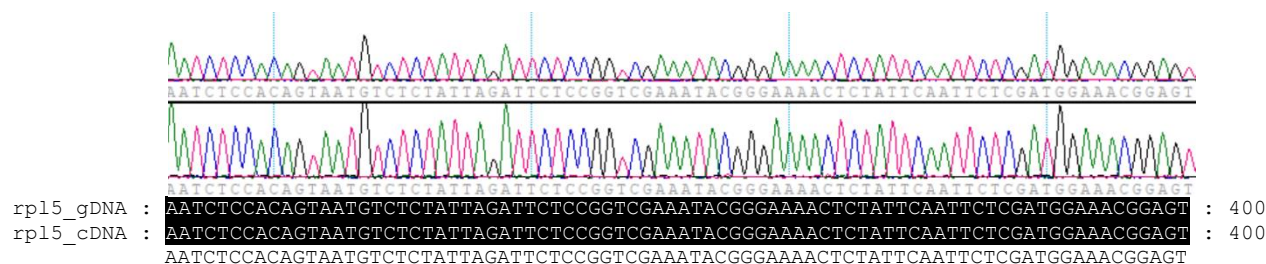



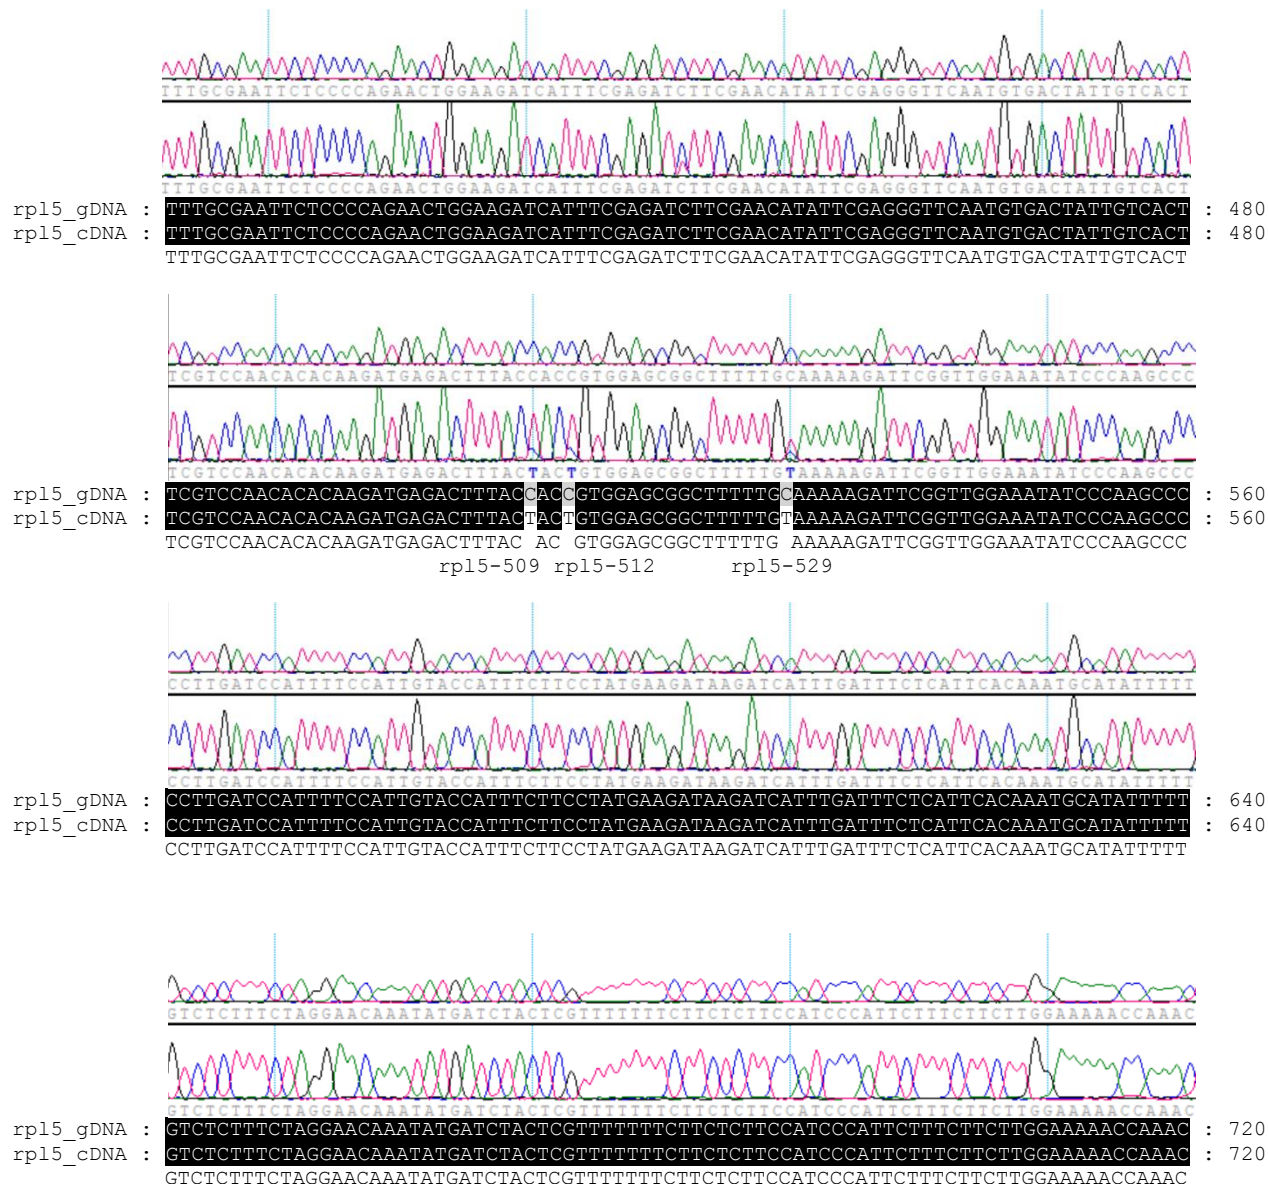

j validation of the *rpl16*-221 using PCR amplification and Sanger sequencing experiments.

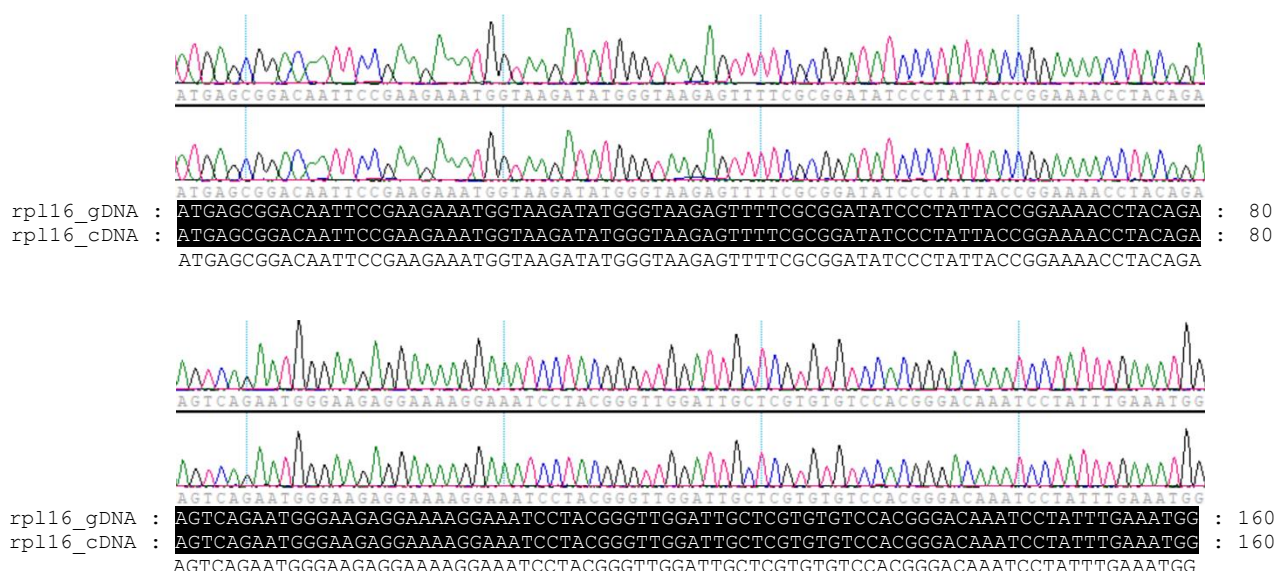

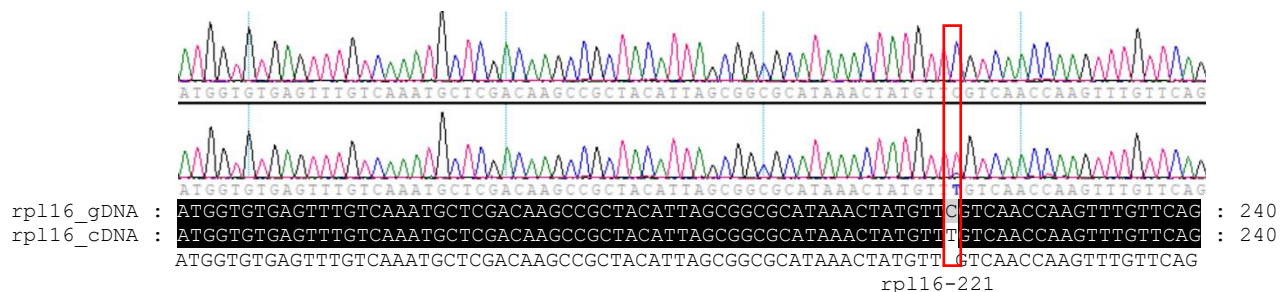

k validation of the *rps13-56*, *rps13-100*, *rps13-287* using PCR amplification and Sanger sequencing experiments.

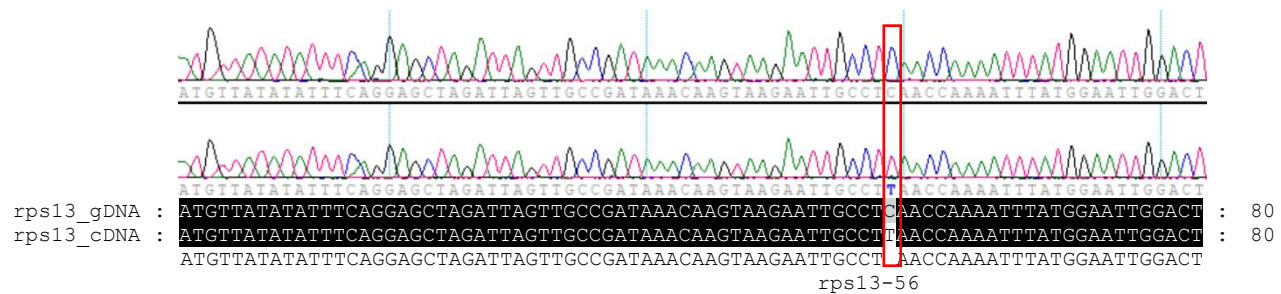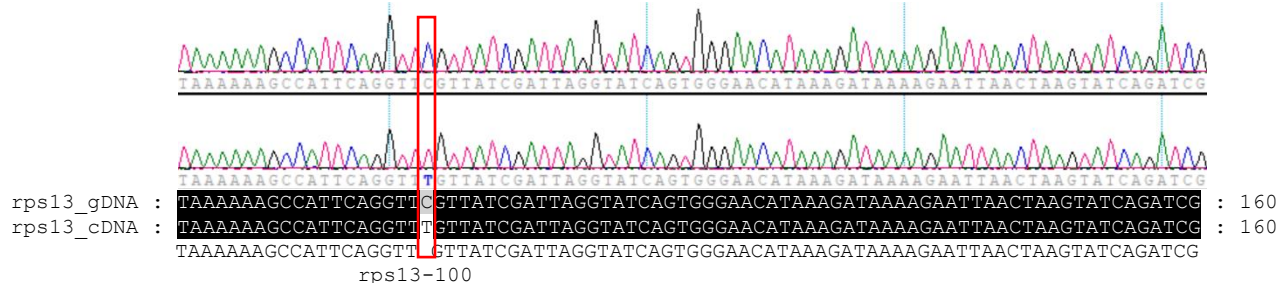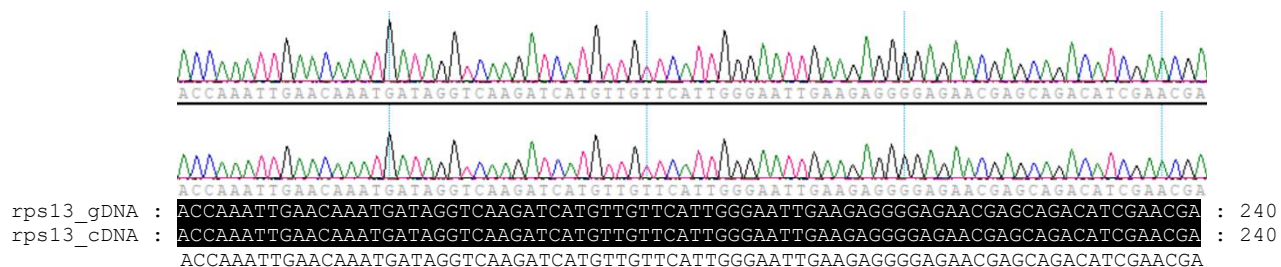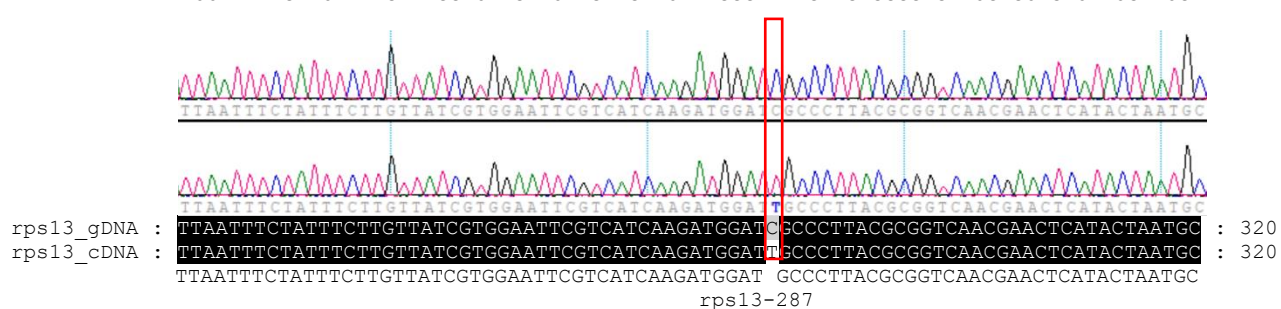

Supplement: s1 [file s1]
